# Supplementary material
Source: publisher site journal article supplement (https://vcs.pensoft.net/article/65469/download/suppl/35/)
Supplement: Supplementary file 1

Supplementary material to the paper Wells AF et al. Vegetation classification for northwestern Arctic Alaska using an EcoVeg approach: tussock tundra and low and tall willow groups and alliances. Vegetation Classification and Survey. DOI: 10.3897/VCS.65469

**Supplementary material 5. Descriptions of preliminary (n = 4–9) and provisional (n ≥ 10) low/tall willow and tussock tundra plant associations from the Ecological Land Survey Legacy Database (ELD) Arctic Plant Association Classification, Alaska.**

This supplementary material provides descriptions of the preliminary (n = 4–9) and provisional (n ≥ 10) low/tall willow and tussock tundra plant associations from the ELD Arctic Plant Association Classification, Alaska. *The plant associations are ordered alphabetically by code (e.g., ALNFRU/BETNAN/ERIVAG).* The codes can be used to link the descriptions to the table of associations presented in supplementary material 6. Each description includes the following elements:

- Plant association code and title (separated by a colon),
- sample size (e.g., n = 14),
- the alliance that the plant association occurs in (top right on the first page each description),
- a narrative description,
- a map of the sample locations,
- representative photos,
- an environmental data summary table,
- a chart displaying the median and 25<sup>th</sup> and 75<sup>th</sup> percentiles of foliar cover for the most common species in 3 lifeform groups, and
- a constancy/cover table.



**ALNFRU/BETNAN/ERIVAG: *Alnus viridis* ssp. *fruticosa*/Betula nana/Eriophorum vaginatum (n = 14)**

A4344p: Arctic Acidic Shrub Tussock Tundra Alliance (proposed)

The plant association *Alnus viridis* ssp. *fruticosa*/Betula nana/Eriophorum vaginatum occurs in Upland physiography most commonly on the following geomorphic units: Hillside Colluvium; Solifluction Deposit; and Bogs. The average elevation in this plant association is 149 m ( $\pm 35$  m), and the slope gradient typically ranges between gently sloping and strongly sloping. This plant association was associated most commonly with the surface form Nonpatterned, but is also regularly associated with Hummocks; Non-sorted Circles, boils and scars; and Peat mounds. Soils are poorly drained to somewhat poorly drained, surface organic thickness typically ranges from very thin to moderately thick, coarse fragments are rare, but when they do occur the average top depth is 24 cm ( $\pm 0$  cm), and permafrost was common with an average active layer thickness of 34 cm ( $\pm 11$  cm). Soil pH typically ranges from acidic to circumacidic, and the average electrical conductivity is 131  $\mu$ S/cm ( $\pm 128$   $\mu$ S/cm). The most common vegetation type is Open Mixed Low Shrub-Sedge Tussock Tundra. *Alnus viridis* ssp. *fruticosa* dominates the site, typically forming an open low shrub canopy, and *Eriophorum vaginatum* forms conspicuous tussocks with a cover of whole tussocks of at least 25%. *Betula nana* occurs between the tussocks at moderate to high cover, and often exhibits a dwarf shrub growth form. Other plant taxa that commonly occur in this plant association at low abundance include, the shrubs *Ledum palustre* ssp. *decumbens*, *Vaccinium vitis-idaea*, and *Vaccinium uliginosum*; the herbs *Pedicularis labradorica*, *Polygonum bistorta*, *Arctagrostis latifolia*, and *Carex bigelowii*; and the nonvasculars *Dicranum elongatum*, *Aulacomnium turgidum*, *Hylocomium splendens*, *Dactylina arctica*, and *Flavocetraria cucullata*. Throughout most of the Alaskan arctic, *A. viridis* ssp. *fruticosa* in this plant association exhibits a low shrub (0.2–1.5 m) growth form and a very open canopy, and the microtopography is commonly characterized by frost boils. However, in the southern arctic, *A. viridis* ssp. *fruticosa* sometimes exhibits a tall shrub (>1.5 m) growth form, canopies are generally more dense, and frost boils are less common.

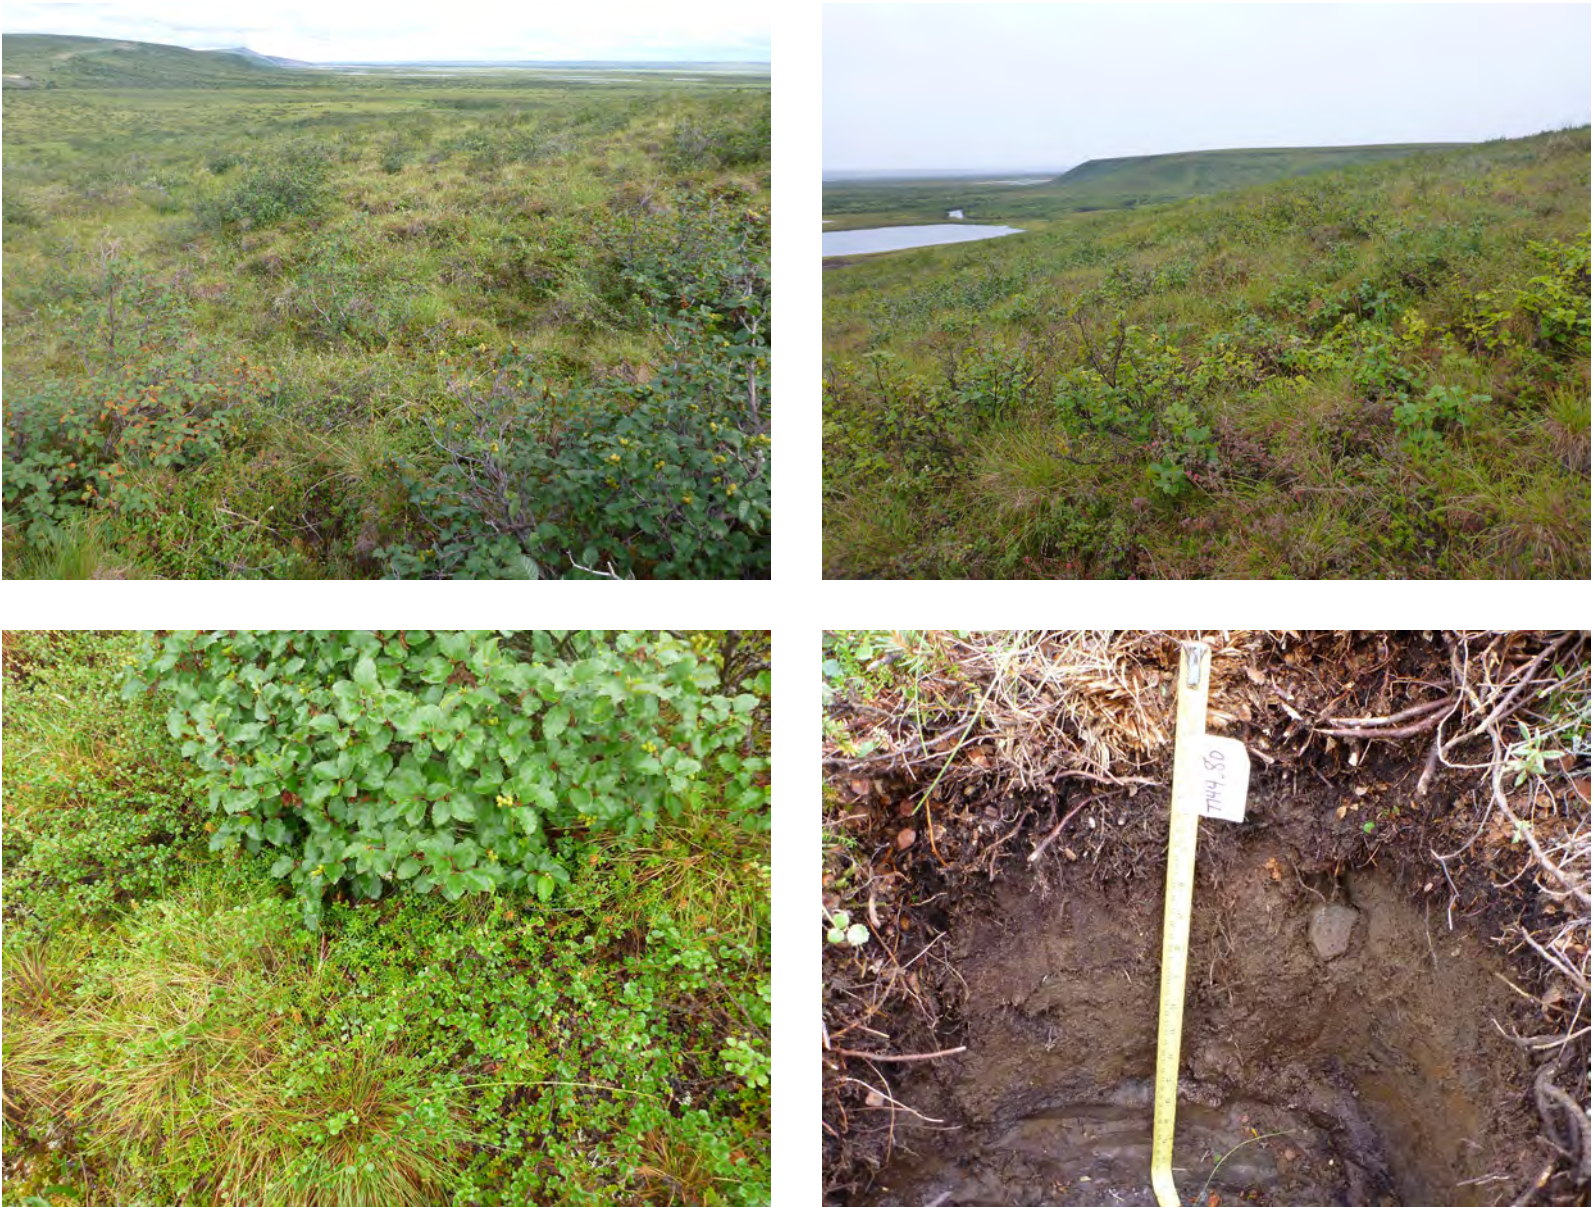

Representative photos (if available) for *Alnus viridis* ssp. *fruticosa*/Betula nana/Eriophorum vaginatum. Top row: landscape photos, bottom row: ground photo (left), soil photo (right).

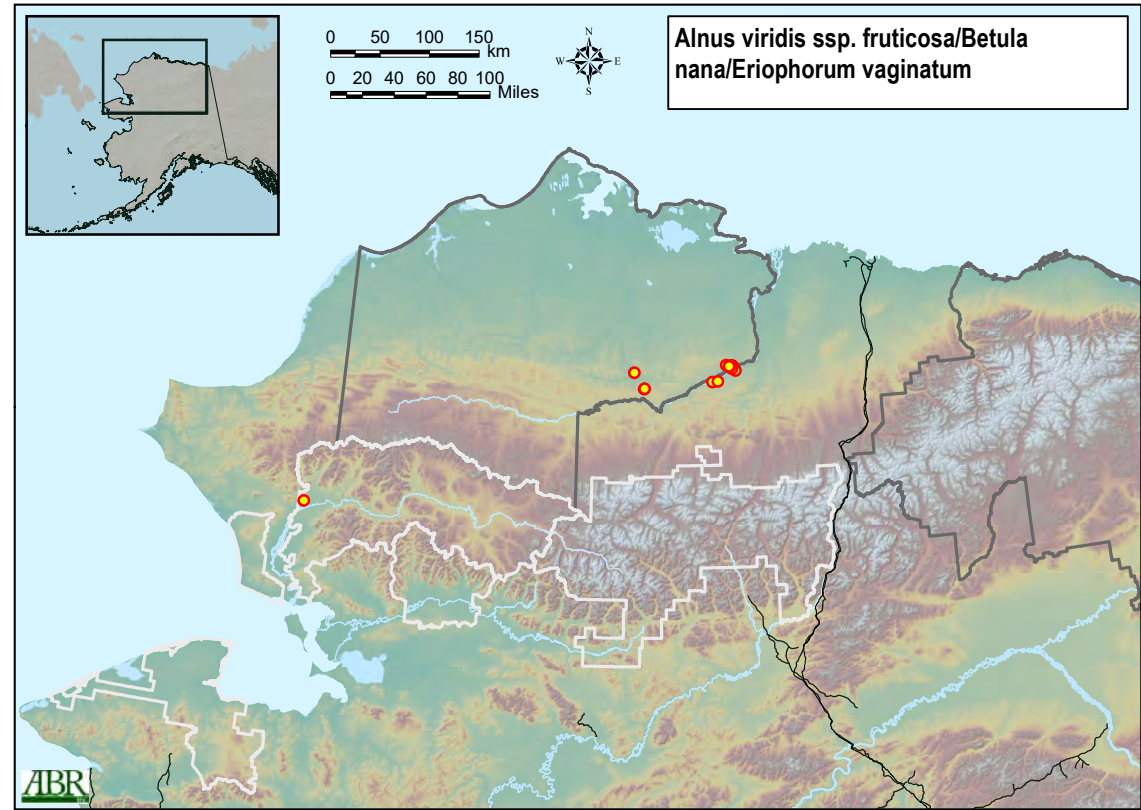

Distribution of *Alnus viridis* ssp. *fruticosa*/Betula nana/Eriophorum vaginatum in the study area.



ALNFRU/BETNAN/ERIVAG: *Alnus viridis* ssp. *fruticosa*/*Betula nana*/*Eriophorum vaginatum*, continued

|                                   | Avg. | Std Dev. | Percentile |      |      | n  |
|-----------------------------------|------|----------|------------|------|------|----|
|                                   |      |          | 10th       | 50th | 90th |    |
| Elevation (m)                     | 149  | 35       | 105        | 157  | 187  | 14 |
| Slope (degrees)                   | 8    | 6        | 2          | 8    | 13   | 14 |
| Surface Organic Thickness (cm)    | 13.1 | 11.4     | 3.0        | 9.5  | 28.0 | 14 |
| Cumul. Org. Thickness (cm)        | 15.9 | 11.0     | 4.3        | 14.0 | 29.8 | 14 |
| Depth to >15% Rock Fragments (cm) | 24   |          | 24         | 24   | 24   | 1  |
| Water Table Depth (cm)            | -30  | 12       | -42        | -29  | -20  | 4  |
| Active Layer Thickness (cm)       | 34   | 11       | 24         | 33   | 40   | 14 |
| Site pH                           | 5.0  | 1.0      | 3.7        | 5.1  | 5.9  | 14 |
| Electrical Conductivity (uS/cm)   | 131  | 128      | 40         | 80   | 318  | 14 |
| Whole Tussock Cover (%)           | 22   | 16       | 8          | 20   | 34   | 14 |

Environmental data summaries for *Alnus viridis* ssp. *fruticosa*/*Betula nana*/*Eriophorum vaginatum*.

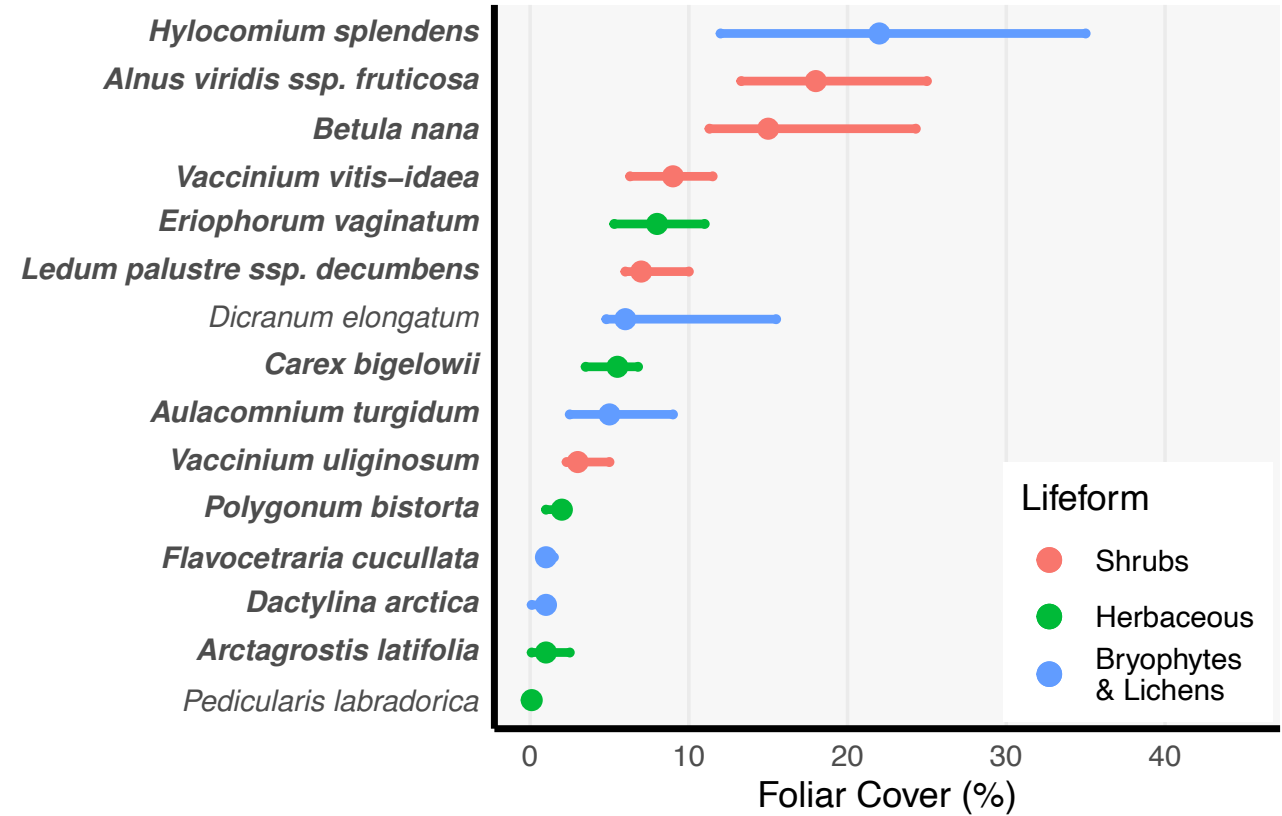

Median and 25th and 75th percentiles of foliar cover for the most common species in 3 lifeform groups in *Alnus viridis* ssp. *fruticosa*/*Betula nana*/*Eriophorum vaginatum*. Latin names on y-axis in bold font occur in ≥70% of plots in this plant association.

| Lifeform         | Code   | USDA Scientific Name                           | Const. | Avg. | Std Dev. | Percentile |      |      |
|------------------|--------|------------------------------------------------|--------|------|----------|------------|------|------|
|                  |        |                                                |        |      |          | 10th       | 50th | 90th |
| Deciduous Shrubs | ALVIF  | <i>Alnus viridis</i> ssp. <i>fruticosa</i>     | 100    | 21.1 | 10.8     | 12.0       | 18.0 | 36.4 |
| Deciduous Shrubs | ARRU   | <i>Arctostaphylos rubra</i>                    | 50     | 5.9  | 5.3      | 1.8        | 3.0  | 11.2 |
| Deciduous Shrubs | BENA   | <i>Betula nana</i>                             | 100    | 19.4 | 13.8     | 7.6        | 15.0 | 28.5 |
| Deciduous Shrubs | SAPU15 | <i>Salix pulchra</i>                           | 93     | 5.9  | 7.6      | 1.2        | 3.0  | 8.6  |
| Deciduous Shrubs | VAUL   | <i>Vaccinium uliginosum</i>                    | 100    | 4.6  | 4.8      | 1.3        | 3.0  | 6.0  |
| Evergreen Shrubs | CATE11 | <i>Cassiope tetragona</i>                      | 86     | 2.4  | 1.8      | 0.1        | 2.0  | 4.0  |
| Evergreen Shrubs | EMNI   | <i>Empetrum nigrum</i>                         | 79     | 7.3  | 6.2      | 3.0        | 5.0  | 15.0 |
| Evergreen Shrubs | LEPAD  | <i>Ledum palustre</i> ssp. <i>decumbens</i>    | 93     | 10.7 | 10.6     | 5.2        | 7.0  | 14.0 |
| Evergreen Shrubs | VAVI   | <i>Vaccinium vitis-idaea</i>                   | 100    | 10.4 | 6.5      | 4.0        | 9.0  | 19.4 |
| Forbs            | POBIP2 | <i>Polygonum bistorta</i> ssp. <i>plumosum</i> | 79     | 1.3  | 0.9      | 0.1        | 2.0  | 2.0  |
| Grasses          | ARLA2  | <i>Arctagrostis latifolia</i>                  | 79     | 1.5  | 1.6      | 0.1        | 1.0  | 3.0  |
| Sedges           | CABI5  | <i>Carex bigelowii</i>                         | 71     | 5.2  | 2.9      | 1.8        | 5.5  | 8.2  |
| Sedges           | ERVA4  | <i>Eriophorum vaginatum</i>                    | 100    | 8.4  | 4.2      | 4.3        | 8.0  | 13.4 |
| Mosses           | AUTU70 | <i>Aulacomnium turgidum</i>                    | 79     | 8.7  | 10.3     | 1.0        | 5.0  | 20.0 |
| Mosses           | DIEL70 | <i>Dicranum elongatum</i>                      | 57     | 9.9  | 7.1      | 4.0        | 6.0  | 18.5 |
| Mosses           | HYSP70 | <i>Hylocomium splendens</i>                    | 93     | 24.9 | 15.7     | 10.4       | 22.0 | 48.0 |
| Lichens          | DAAR60 | <i>Dactylina arctica</i>                       | 86     | 1.0  | 0.6      | 0.1        | 1.0  | 1.0  |
| Lichens          | FLCU   | <i>Flavocetraria cucullata</i>                 | 79     | 1.2  | 1.0      | 0.1        | 1.0  | 3.0  |

Constancy and foliar cover data summaries for *Alnus viridis* ssp. *fruticosa*/*Betula nana*/*Eriophorum vaginatum*. Constancy/cover summaries limited to taxa occurring in this plant association with a constancy ≥60 and average cover >0, or taxa with a constancy ≥40 and average cover ≥3.



**BETNAN–LEDDEC/ERIVAG: *Betula nana*–*Ledum palustre* ssp. *decumbens*/*Eriophorum vaginatum* (n = 77)**

A4344p: Arctic Acidic Shrub Tussock Tundra Alliance (proposed)

The plant association *Betula nana*–*Ledum palustre* ssp. *decumbens*/*Eriophorum vaginatum* occurs in Upland physiography most commonly on the following geomorphic units: Eolian Sand Sheet Upland; Frozen Upland Silt; and Upland Loess. The average elevation in this plant association is 126 m (±135 m), and the slope gradient typically ranges between flat and nearly level. This plant association was associated most commonly with the surface form High-centered, Low-relief Polygons, but is also regularly associated with Nonpatterned; Mixed pits and polygons; and High-centered, High-relief Polygons. Soils are poorly drained to somewhat poorly drained, surface organic thickness typically ranges from thin to moderately thick, coarse fragments are rare, but when they do occur the average top depth is 59 cm (±82 cm), dominant soil texture in the upper 40 cm is typically Organic-rich or Loamy, and permafrost was common with an average active layer thickness of 31 cm (±8 cm). Soil pH typically ranges from acidic to circumacidic, and the average electrical conductivity is 86 µS/cm (±75 µS/cm). The most common vegetation types include Open Mixed Low Shrub-Sedge Tussock Tundra and Tussock Tundra-Ericaceous. The vegetation is co-dominated by *Betula nana* and *Ledum palustre* ssp. *decumbens* which typically form an open low shrub canopy, and *Eriophorum vaginatum* forms conspicuous tussocks with a cover of whole tussocks of at least 25%. Other plant taxa that commonly occur in this plant association at low abundance include, the shrubs *Salix pulchra*, *Vaccinium vitis-idaea*, and *Cassiope tetragona*; the herbs *Arctagrostis latifolia*, *Carex bigelowii*, *Rubus chamaemorus*, and *Polygonum bistorta*; and the nonvasculars *Dicranum elongatum*, *Flavocetraria cucullata*, *Aulacomnium turgidum*, *Dactylina arctica*, and *Hylocomium splendens*.

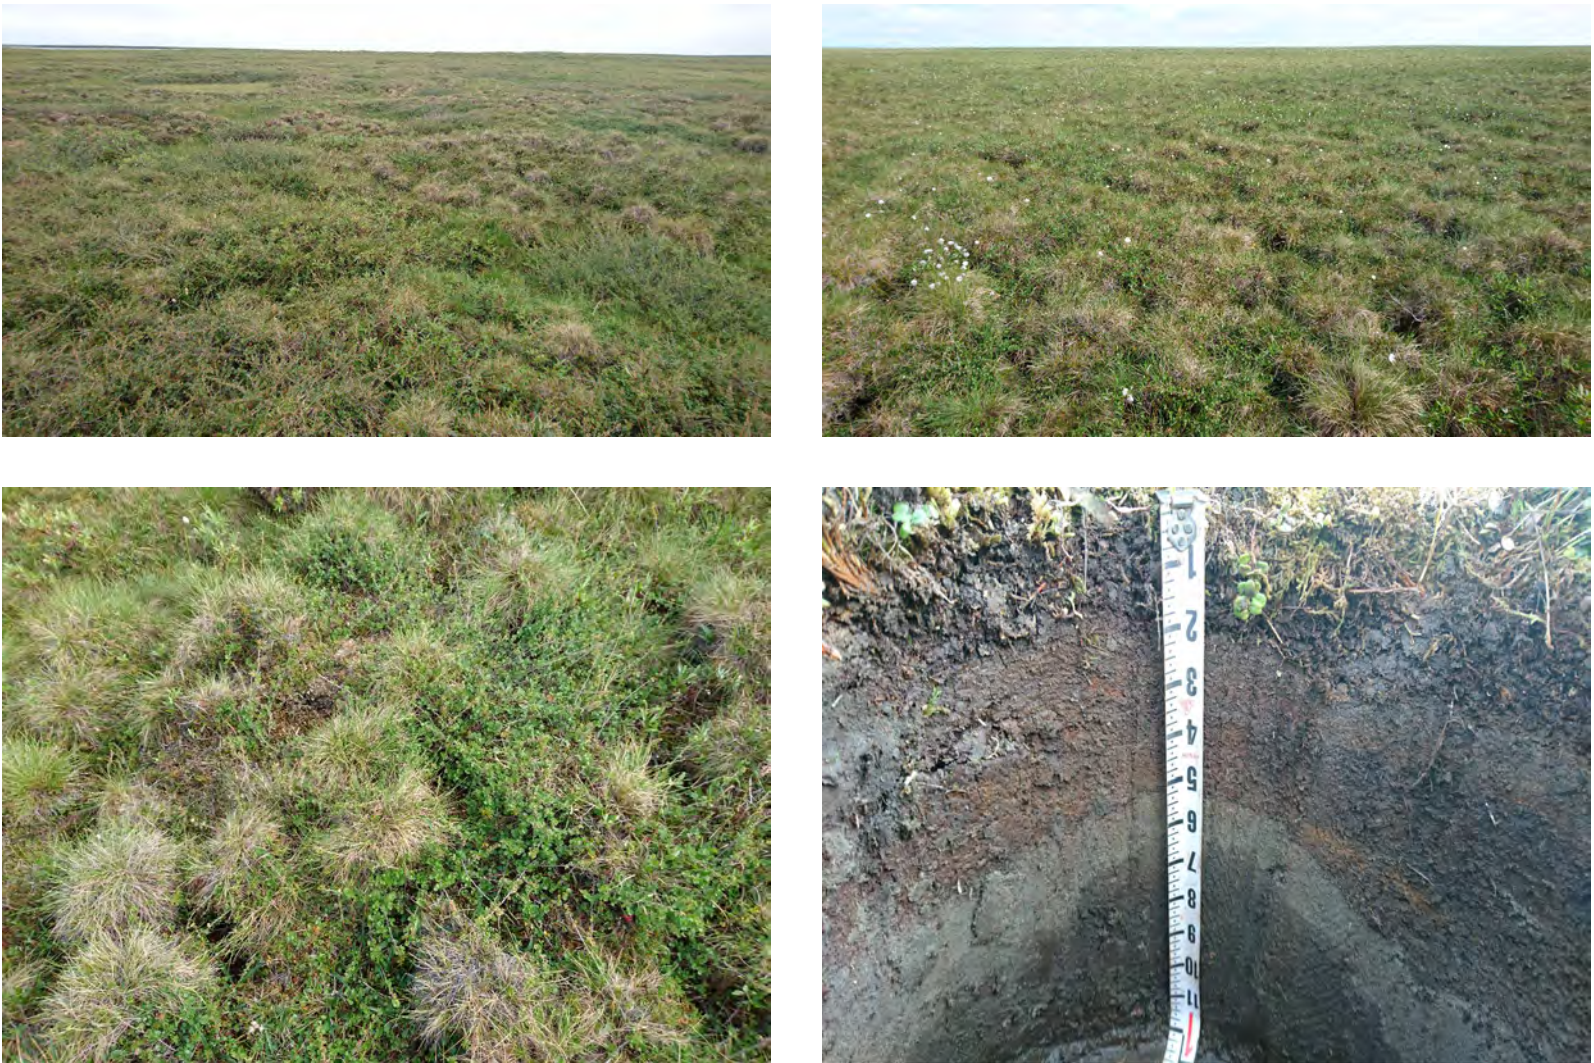

Representative photos (if available) for *Betula nana*–*Ledum palustre* ssp. *decumbens*/*Eriophorum vaginatum*. Top row: landscape photos, bottom row: ground photo (left), soil photo (right).

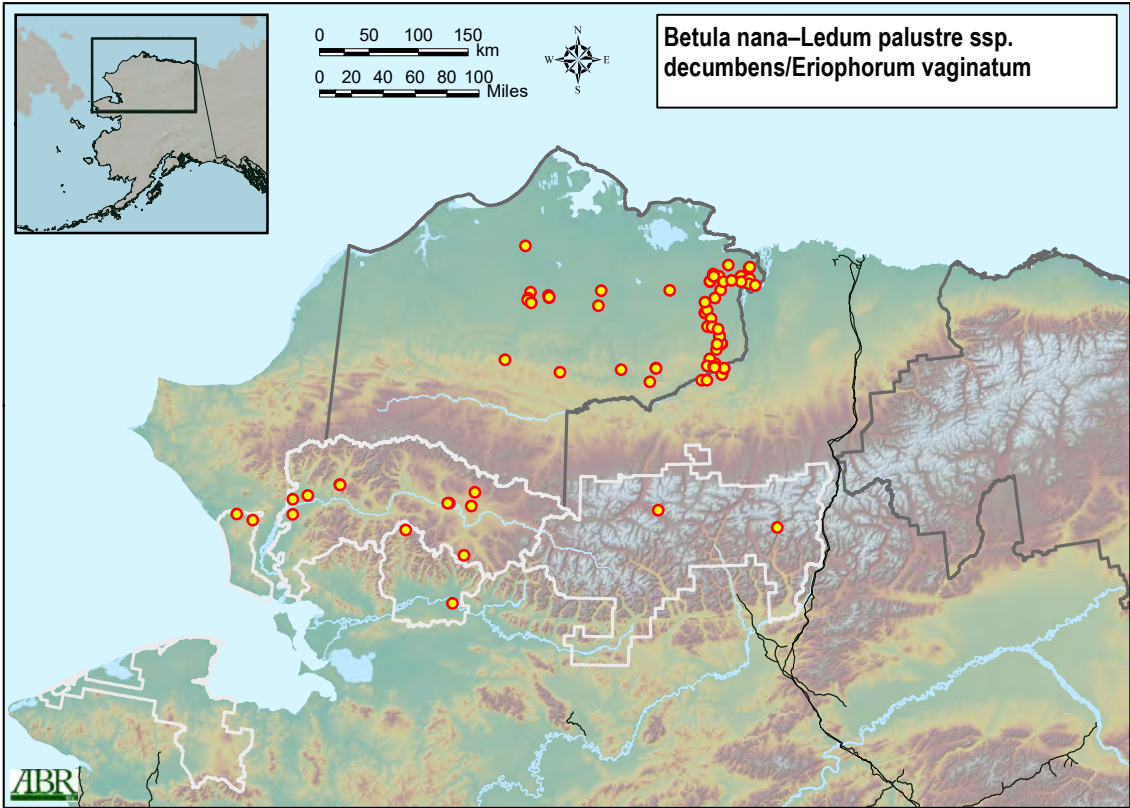

Distribution of *Betula nana*–*Ledum palustre* ssp. *decumbens*/*Eriophorum vaginatum* in the study area.



BETNAN–LEDDEC/ERIVAG: *Betula nana*–*Ledum palustre* ssp. *decumbens*/*Eriophorum vaginatum*, continued

|                                   | Avg. | Std Dev. | Percentile |      |      | n  |
|-----------------------------------|------|----------|------------|------|------|----|
|                                   |      |          | 10th       | 50th | 90th |    |
| Elevation (m)                     | 126  | 135      | 24         | 86   | 265  | 75 |
| Slope (degrees)                   | 1    | 2        | 0          | 1    | 4    | 76 |
| Surface Organic Thickness (cm)    | 17.6 | 9.1      | 7.4        | 17.0 | 30.7 | 77 |
| Cumul. Org. Thickness (cm)        | 20.5 | 8.6      | 10.6       | 20.7 | 30.0 | 76 |
| Depth to >15% Rock Fragments (cm) | 59   | 82       | 0          | 22   | 200  | 9  |
| Water Table Depth (cm)            | -27  | 9        | -39        | -30  | -13  | 35 |
| Active Layer Thickness (cm)       | 31   | 8        | 21         | 32   | 39   | 69 |
| Site pH                           | 5.3  | 0.7      | 4.3        | 5.4  | 6.2  | 75 |
| Electrical Conductivity (uS/cm)   | 86   | 75       | 20         | 60   | 175  | 76 |
| Whole Tussock Cover (%)           | 36   | 18       | 12         | 35   | 61   | 70 |

Environmental data summaries for *Betula nana*–*Ledum palustre* ssp. *decumbens*/*Eriophorum vaginatum*.

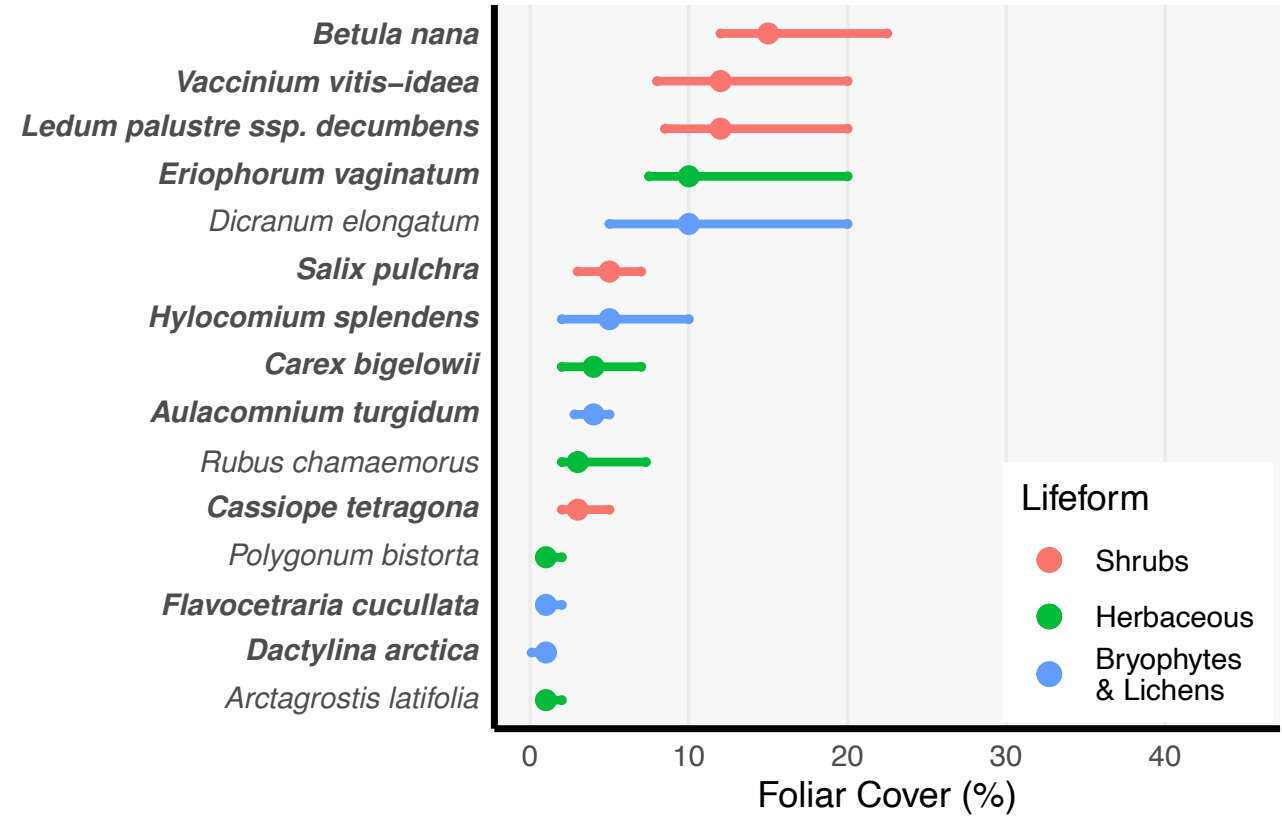

Median and 25th and 75th percentiles of foliar cover for the most common species in 3 lifeform groups in *Betula nana*–*Ledum palustre* ssp. *decumbens*/*Eriophorum vaginatum*. Latin names on y-axis in bold font occur in ≥70% of plots in this plant association.

| Lifeform         | Code   | USDA Scientific Name                        | Const. | Avg. | Std Dev. | Percentile |      |      |
|------------------|--------|---------------------------------------------|--------|------|----------|------------|------|------|
|                  |        |                                             |        |      |          | 10th       | 50th | 90th |
| Deciduous Shrubs | BENA   | <i>Betula nana</i>                          | 100    | 18.3 | 8.2      | 10.0       | 15.0 | 28.4 |
| Deciduous Shrubs | SAPU15 | <i>Salix pulchra</i>                        | 93     | 5.7  | 3.3      | 2.0        | 5.0  | 10.0 |
| Deciduous Shrubs | VAUL   | <i>Vaccinium uliginosum</i>                 | 53     | 4.2  | 5.1      | 1.0        | 2.0  | 8.2  |
| Evergreen Shrubs | CATE11 | <i>Cassiope tetragona</i>                   | 80     | 3.3  | 2.1      | 1.0        | 3.0  | 5.0  |
| Evergreen Shrubs | EMNI   | <i>Empetrum nigrum</i>                      | 67     | 3.2  | 2.6      | 1.0        | 2.0  | 5.1  |
| Evergreen Shrubs | LEPAD  | <i>Ledum palustre</i> ssp. <i>decumbens</i> | 100    | 13.7 | 7.3      | 6.4        | 12.0 | 25.0 |
| Evergreen Shrubs | VAVI   | <i>Vaccinium vitis-idaea</i>                | 100    | 14.1 | 8.8      | 5.0        | 12.0 | 25.0 |
| Forbs            | RUCH   | <i>Rubus chamaemorus</i>                    | 64     | 5.0  | 4.7      | 1.0        | 3.0  | 10.0 |
| Sedges           | CABI5  | <i>Carex bigelowii</i>                      | 93     | 5.1  | 4.3      | 1.0        | 4.0  | 10.2 |
| Sedges           | ERVA4  | <i>Eriophorum vaginatum</i>                 | 100    | 14.1 | 9.4      | 5.0        | 10.0 | 25.0 |
| Mosses           | AUTU70 | <i>Aulacomnium turgidum</i>                 | 80     | 4.9  | 3.9      | 1.0        | 4.0  | 10.0 |
| Mosses           | DIEL70 | <i>Dicranum elongatum</i>                   | 55     | 14.6 | 14.0     | 3.0        | 10.0 | 35.0 |
| Mosses           | HYSP70 | <i>Hylocomium splendens</i>                 | 75     | 6.7  | 7.4      | 1.0        | 5.0  | 15.0 |
| Lichens          | DAAR60 | <i>Dactylina arctica</i>                    | 80     | 1.0  | 0.7      | 0.1        | 1.0  | 2.0  |
| Lichens          | FLCU   | <i>Flavocetraria cucullata</i>              | 91     | 1.9  | 1.8      | 0.1        | 1.0  | 4.0  |

Constancy and foliar cover data summaries for *Betula nana*–*Ledum palustre* ssp. *decumbens*/*Eriophorum vaginatum*. Constancy/cover summaries limited to taxa occurring in this plant association with a constancy ≥60 and average cover >0, or taxa with a constancy ≥40 and average cover ≥3.



**BETNAN–SALGLA/VACVIT/CARBIG: *Betula nana*–*Salix glauca*/*Vaccinium vitis-idaea*/*Carex bigelowii* (n = 5)**

A4339: Arctic Dwarf Birch Low Shrub Tundra Alliance

The plant association *Betula nana*–*Salix glauca*/*Vaccinium vitis-idaea*/*Carex bigelowii* occurs in Upland physiography most commonly on the following geomorphic units: Hillside Colluvium; Drained Basin, ice-rich center; and Drained Lake Basin, pingo. The average elevation in this plant association is 407 m ( $\pm 486$  m), and the slope gradient typically ranges between gently sloping and strongly sloping. This plant association was associated most commonly with the surface form Non-sorted Circles, boils and scars, but is also regularly associated with High-centered, High-relief Polygons; High-centered, Low-relief Polygons; and Undifferentiated mounds. Soils are somewhat poorly drained to well drained, surface organic thickness is typically thin, coarse fragments are uncommon, but when they do occur the average top depth is 10 cm ( $\pm 13$  cm), dominant soil texture in the upper 40 cm is typically Clayey or Gravelly, and permafrost was common with an average active layer thickness of 46 cm ( $\pm 18$  cm). Soil pH typically ranges from acidic to circumalkaline, and the average electrical conductivity is 146  $\mu$ S/cm ( $\pm 111$   $\mu$ S/cm). The most common vegetation type is Open Low Shrub Birch-Willow. The vegetation is co-dominated by *Betula nana* and *Salix glauca* which typically form an open low shrub canopy, and *Vaccinium vitis-idaea* is always prevalent in the dwarf shrub layer. In the herbaceous layer, *Carex bigelowii* is consistently present at moderate cover. Other plant taxa that commonly occur in this plant association at low abundance include, the shrubs *Salix pulchra* and *Cassiope tetragona*; the herbs *Arctagrostis latifolia*, *Poa arctica*, *Polygonum bistorta*, and *Saussurea angustifolia*; and the nonvasculars *Rhytidium rugosum*, *Aulacomnium turgidum*, *Flavocetraria cucullata*, *Hylocomium splendens*, and *Peltigera aphthosa*.

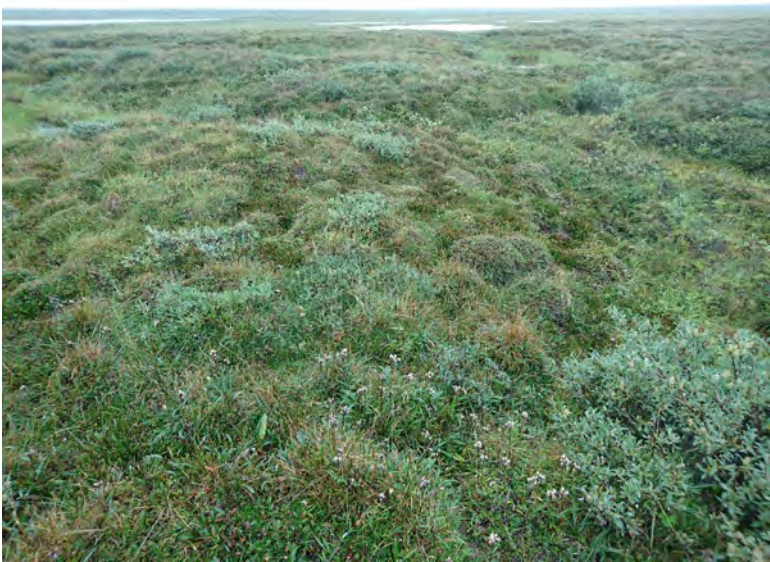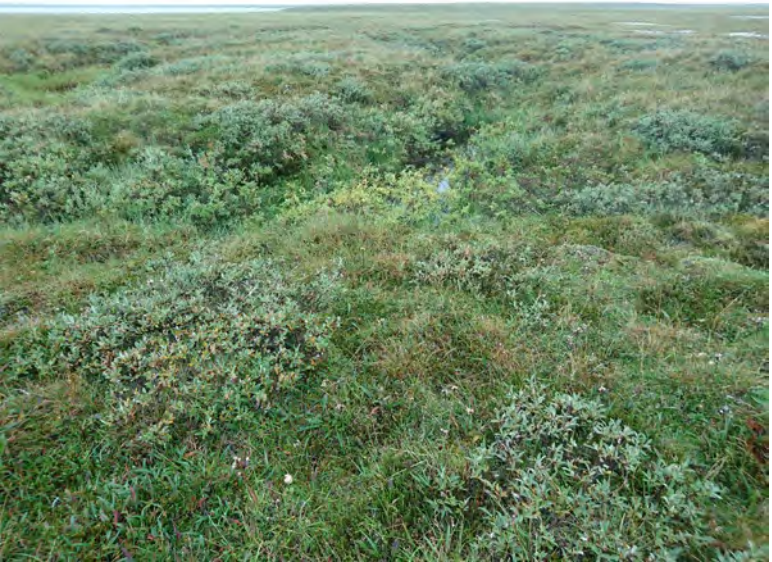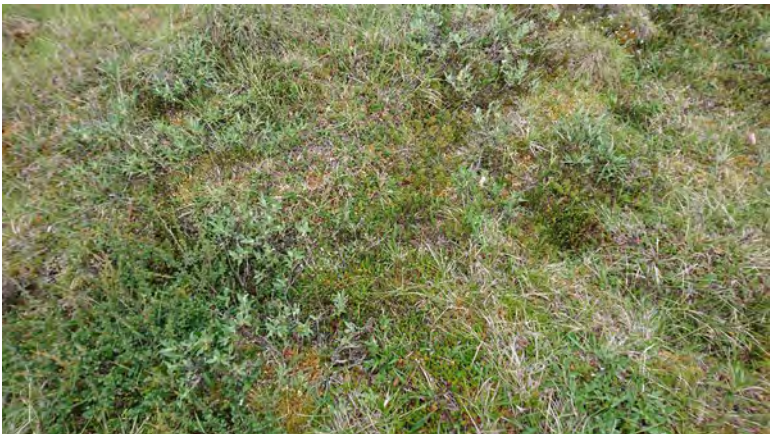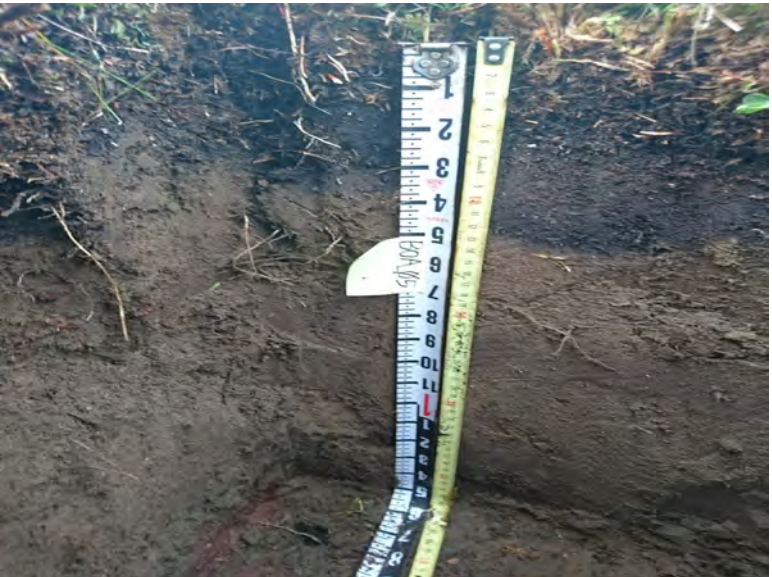

Representative photos (if available) for *Betula nana*–*Salix glauca*/*Vaccinium vitis-idaea*/*Carex bigelowii*. Top row: landscape photos, bottom row: ground photo (left), soil photo (right).

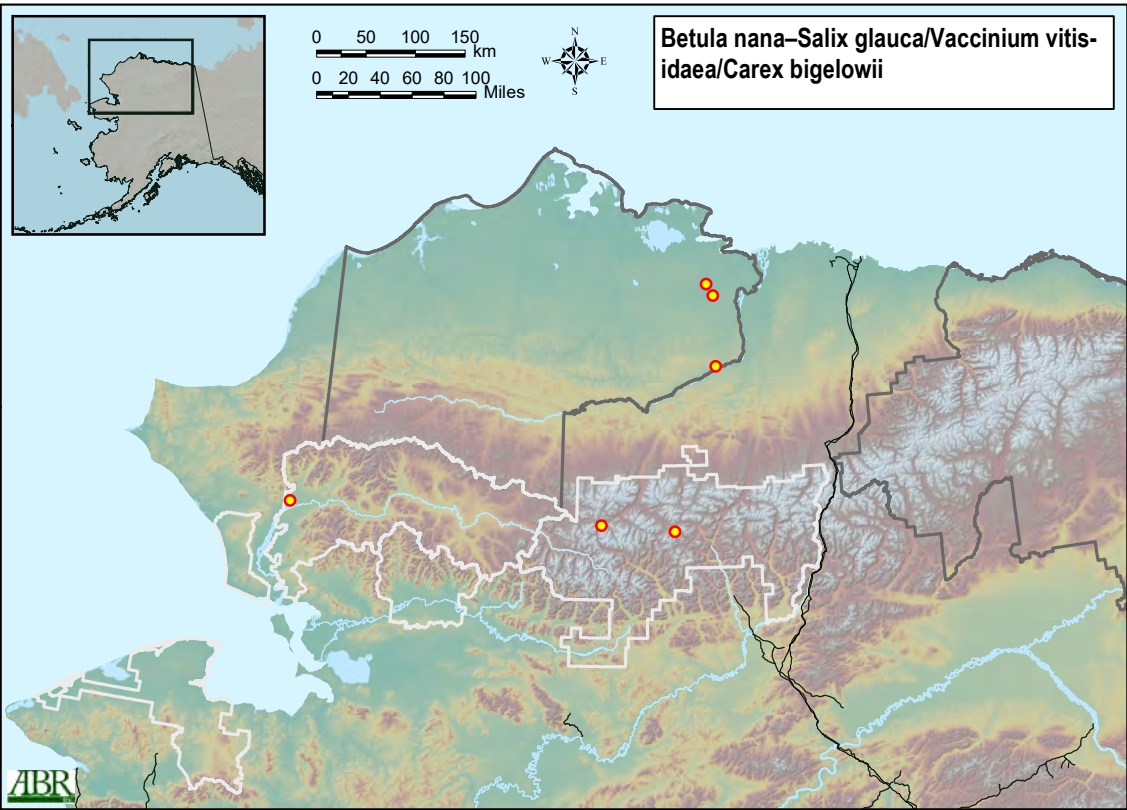

Distribution of *Betula nana*–*Salix glauca*/*Vaccinium vitis-idaea*/*Carex bigelowii* in the study area.



BETNAN–SALGLA/VACVIT/CARBIG: *Betula nana*–*Salix glauca*/*Vaccinium vitis-idaea*/*Carex bigelowii*, continued

|                                   | Avg. | Std Dev. | Percentile |      |      | n |
|-----------------------------------|------|----------|------------|------|------|---|
|                                   |      |          | 10th       | 50th | 90th |   |
| Elevation (m)                     | 407  | 486      | 30         | 98   | 938  | 5 |
| Slope (degrees)                   | 6    | 4        | 2          | 7    | 9    | 5 |
| Surface Organic Thickness (cm)    | 8.6  | 4.2      | 4.2        | 8.9  | 12.6 | 5 |
| Cumul. Org. Thickness (cm)        | 8.6  | 4.2      | 4.2        | 8.9  | 12.6 | 5 |
| Depth to >15% Rock Fragments (cm) | 10   | 13       | 2          | 10   | 17   | 2 |
| Water Table Depth (cm)            | -18  |          | -18        | -18  | -18  | 1 |
| Active Layer Thickness (cm)       | 46   | 18       | 33         | 44   | 61   | 3 |
| Site pH                           | 6.0  | 1.1      | 4.9        | 6.1  | 7.1  | 5 |
| Electrical Conductivity (uS/cm)   | 146  | 111      | 44         | 140  | 262  | 5 |
| Whole Tussock Cover (%)           | 2    | 2        | 0          | 2    | 3    | 4 |

Environmental data summaries for *Betula nana*–*Salix glauca*/*Vaccinium vitis-idaea*/*Carex bigelowii*.

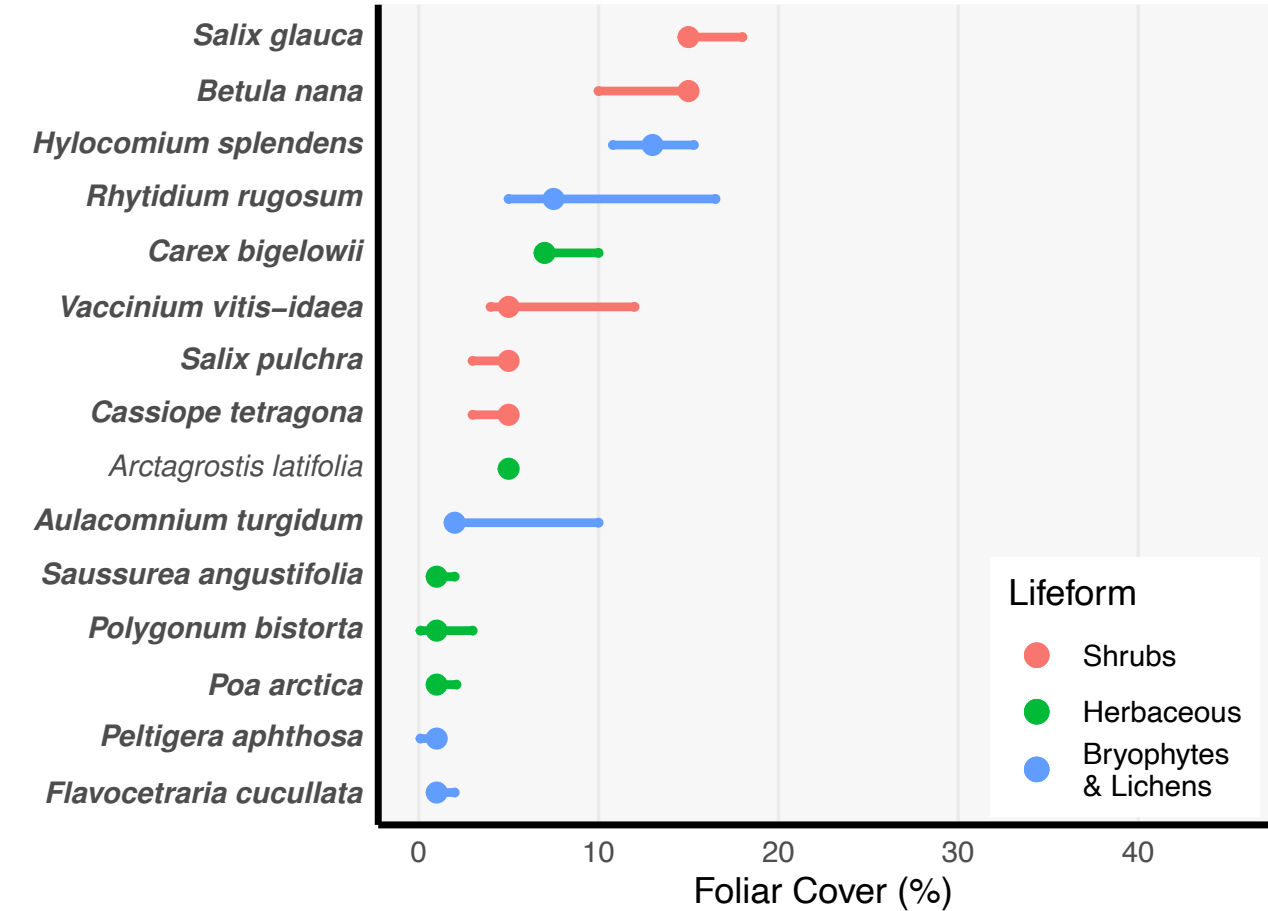

Median and 25th and 75th percentiles of foliar cover for the most common species in 3 lifeform groups in *Betula nana*–*Salix glauca*/*Vaccinium vitis-idaea*/*Carex bigelowii*. Latin names on y-axis in bold font occur in ≥70% of plots in this plant association.

| Lifeform         | Code   | USDA Scientific Name                                | Const. | Avg. | Std Dev. | Percentile |      |      |
|------------------|--------|-----------------------------------------------------|--------|------|----------|------------|------|------|
|                  |        |                                                     |        |      |          | 10th       | 50th | 90th |
| Deciduous Shrubs | ARAL13 | <i>Arctous alpina</i>                               | 40     | 6.0  | 1.4      | 5.2        | 6.0  | 6.8  |
| Deciduous Shrubs | BENA   | <i>Betula nana</i>                                  | 100    | 13.0 | 2.7      | 10.0       | 15.0 | 15.0 |
| Deciduous Shrubs | SAGL   | <i>Salix glauca</i>                                 | 100    | 16.6 | 5.5      | 12.0       | 15.0 | 22.2 |
| Deciduous Shrubs | SAPH   | <i>Salix phlebophylla</i>                           | 60     | 2.3  | 1.2      | 1.4        | 3.0  | 3.0  |
| Deciduous Shrubs | SAPU15 | <i>Salix pulchra</i>                                | 100    | 5.2  | 2.9      | 3.0        | 5.0  | 8.0  |
| Deciduous Shrubs | SARE2  | <i>Salix reticulata</i>                             | 60     | 5.7  | 4.0      | 2.6        | 5.0  | 9.0  |
| Deciduous Shrubs | VAUL   | <i>Vaccinium uliginosum</i>                         | 100    | 4.8  | 3.1      | 2.4        | 4.0  | 8.0  |
| Evergreen Shrubs | CATE11 | <i>Cassiope tetragona</i>                           | 100    | 5.0  | 3.1      | 2.4        | 5.0  | 8.0  |
| Evergreen Shrubs | DRIN4  | <i>Dryas integrifolia</i>                           | 60     | 6.7  | 1.5      | 5.4        | 7.0  | 7.8  |
| Evergreen Shrubs | DROC   | <i>Dryas octopetala</i>                             | 40     | 6.5  | 4.9      | 3.7        | 6.5  | 9.3  |
| Evergreen Shrubs | EMNI   | <i>Empetrum nigrum</i>                              | 80     | 3.8  | 1.5      | 2.3        | 4.0  | 5.0  |
| Evergreen Shrubs | LEPAD  | <i>Ledum palustre</i> ssp. <i>decumbens</i>         | 80     | 6.5  | 4.7      | 2.2        | 6.5  | 10.8 |
| Evergreen Shrubs | VAVI   | <i>Vaccinium vitis-idaea</i>                        | 100    | 7.6  | 5.6      | 2.8        | 5.0  | 13.8 |
| Forbs            | PECA2  | <i>Pedicularis capitata</i>                         | 60     | 1.0  | 0.0      | 1.0        | 1.0  | 1.0  |
| Forbs            | PEFR5  | <i>Petasites frigidus</i>                           | 60     | 3.0  | 1.0      | 2.2        | 3.0  | 3.8  |
| Forbs            | POBIP2 | <i>Polygonum bistorta</i> ssp. <i>plumosum</i>      | 100    | 1.4  | 1.5      | 0.1        | 1.0  | 3.0  |
| Forbs            | POVI3  | <i>Polygonum viviparum</i>                          | 60     | 0.1  | 0.5      | 0.1        | 0.1  | 1.0  |
| Forbs            | PYAS   | <i>Pyrola asarifolia</i>                            | 60     | 1.4  | 1.5      | 0.1        | 1.0  | 2.6  |
| Forbs            | PYGR   | <i>Pyrola grandiflora</i>                           | 40     | 4.1  | 5.6      | 1.0        | 4.1  | 7.2  |
| Forbs            | SAAN3  | <i>Saussurea angustifolia</i>                       | 100    | 1.4  | 0.5      | 1.0        | 1.0  | 2.0  |
| Forbs            | STLO2  | <i>Stellaria longipes</i>                           | 60     | 1.0  | 0.5      | 0.1        | 1.0  | 1.0  |
| Grasses          | ANMOA3 | <i>Anthoxanthum monticola</i> ssp. <i>alpinum</i>   | 60     | 1.7  | 1.2      | 1.0        | 1.0  | 2.6  |
| Grasses          | ARLA2  | <i>Arctagrostis latifolia</i>                       | 60     | 5.0  | 0.0      | 5.0        | 5.0  | 5.0  |
| Grasses          | ARLAL6 | <i>Arctagrostis latifolia</i> ssp. <i>latifolia</i> | 40     | 3.0  | 2.8      | 1.4        | 3.0  | 4.6  |
| Grasses          | POAR2  | <i>Poa arctica</i>                                  | 100    | 1.4  | 1.1      | 0.1        | 1.0  | 2.6  |
| Sedges           | CABI5  | <i>Carex bigelowii</i>                              | 100    | 7.8  | 2.2      | 5.8        | 7.0  | 10.0 |
| Mosses           | AUTU70 | <i>Aulacomnium turgidum</i>                         | 100    | 5.8  | 5.8      | 1.4        | 2.0  | 12.4 |
| Mosses           | DIEL70 | <i>Dicranum elongatum</i>                           | 60     | 7.3  | 4.6      | 3.6        | 10.0 | 10.0 |
| Mosses           | HYSP70 | <i>Hylocomium splendens</i>                         | 80     | 13.0 | 2.9      | 10.3       | 13.0 | 15.7 |
| Mosses           | POJU70 | <i>Polytrichum juniperinum</i>                      | 40     | 3.0  | 2.8      | 1.4        | 3.0  | 4.6  |
| Mosses           | RHRU70 | <i>Rhytidium rugosum</i>                            | 80     | 14.0 | 14.9     | 5.0        | 7.5  | 28.2 |
| Mosses           | SPFI4  | <i>Sphagnum fimbriatum</i>                          | 40     | 3.5  | 2.1      | 2.3        | 3.5  | 4.7  |
| Mosses           | SPWA70 | <i>Sphagnum warnstorffii</i>                        | 40     | 5.0  | 2.8      | 3.4        | 5.0  | 6.6  |
| Mosses           | TONI70 | <i>Tomentypnum nitens</i>                           | 40     | 16.0 | 5.7      | 12.8       | 16.0 | 19.2 |
| Lichens          | CLRA60 | <i>Cladina rangiferina</i>                          | 60     | 1.7  | 1.5      | 0.1        | 2.0  | 2.8  |
| Lichens          | FLCU   | <i>Flavocetraria cucullata</i>                      | 100    | 1.6  | 0.9      | 1.0        | 1.0  | 2.6  |
| Lichens          | FLNI   | <i>Flavocetraria nivalis</i>                        | 60     | 1.0  | 1.0      | 0.1        | 1.0  | 1.8  |
| Lichens          | PEAP60 | <i>Peltigera aphthosa</i>                           | 80     | 1.0  | 0.9      | 0.1        | 1.0  | 1.7  |

Constancy and foliar cover data summaries for *Betula nana*–*Salix glauca*/*Vaccinium vitis-idaea*/*Carex bigelowii*. Constancy/cover summaries limited to taxa occurring in this plant association with a constancy ≥60 and average cover >0, or taxa with a constancy ≥40 and average cover ≥3.



**BETNAN–SALGLA/VACVIT/SAUANG: *Betula nana*–*Salix glauca*/*Vaccinium vitis-idaea*/*Saussurea angustifolia* (n = 7)**

A4339: Arctic Dwarf Birch Low Shrub Tundra Alliance

The plant association *Betula nana*–*Salix glauca*/*Vaccinium vitis-idaea*/*Saussurea angustifolia* occurs in Upland physiography most commonly on the following geomorphic units: Hillside Colluvium; Alluvial-Marine Deposit; and Moraine, older. The average elevation in this plant as- association is 231m (±292m), and the slope gradient typically ranges between strongly sloping and steep. This plant association was associated most commonly with the surface form Hum- mocks, but is also regularly associated with Rocky Mounds/Outcrops and Undifferentiated mounds. Soils are moderately well drained to well drained, surface organic thickness typi- cally ranges from very thin to thin, coarse fragments are uncommon, but when they do oc- cur the average top depth is 18cm (±9cm), dominant soil texture in the upper 40 cm is typ- ically Loamy or Blocky, and permafrost was common with an average active layer thickness of 39cm (±10cm). Soil pH is typically circumacidic, and the average electrical conductivity is 144µS/cm (±116µS/cm). The most common vegetation types include Open Low Shrub Birch- Willow and Open Low Mesic Shrub Birch-Ericaceous Shrub. The vegetation is co-dominated by *Betula nana* and *Salix glauca* which typically form an open low shrub canopy, and *Vac- cinium vitis-idaea* is always prevalent in the dwarf shrub layer. In the herbaceous layer, *Saus- surea angustifolia* is consistently present at low cover. Other plant taxa that commonly occur in this plant association at low abundance include, the shrubs *Salix reticulata* and *Empetrum nigrum*; the herbs *Carex bigelowii*, *Poa arctica*, *Polygonum bistorta*, and *Arctagrostis latifolia*; and the nonvasculars *Aulacomnium turgidum*, *Hylocomium splendens*, *Flavocetraria cucullata*, *Rhytidium rugosum*, and *Thamnolia vermicularis*.

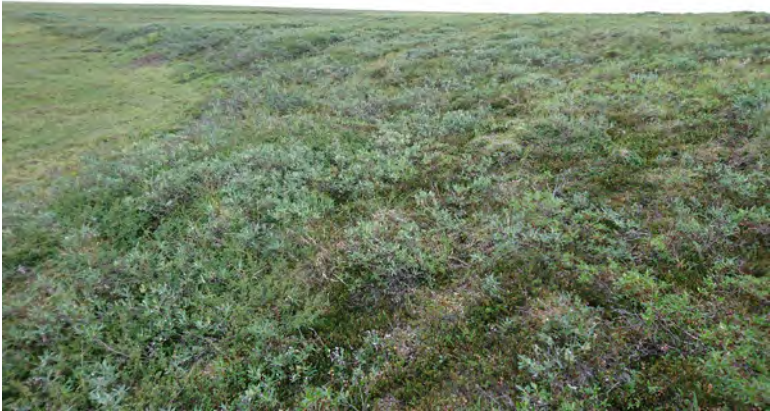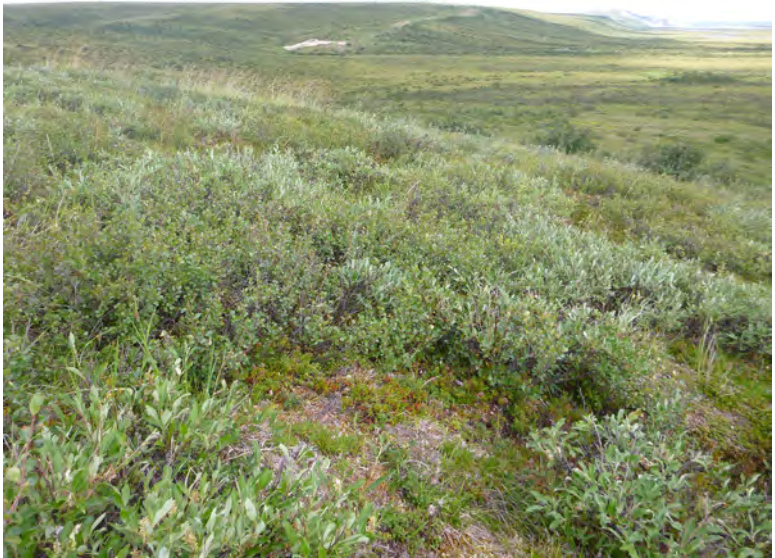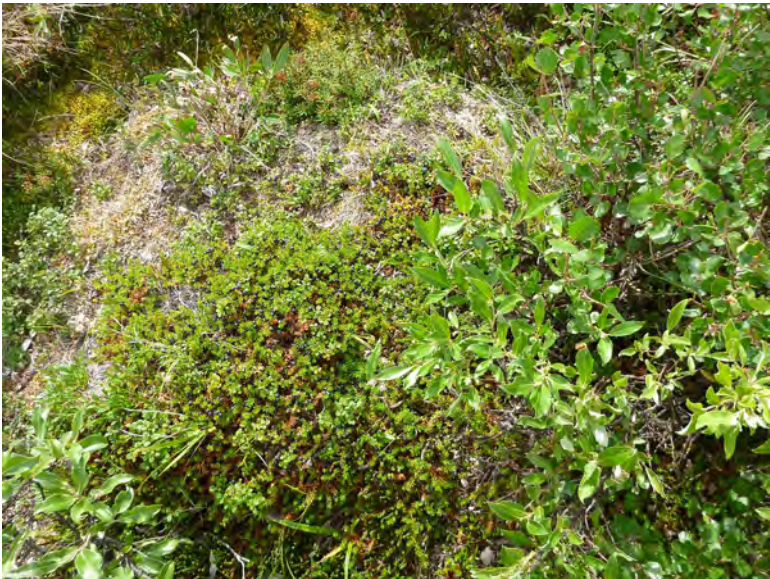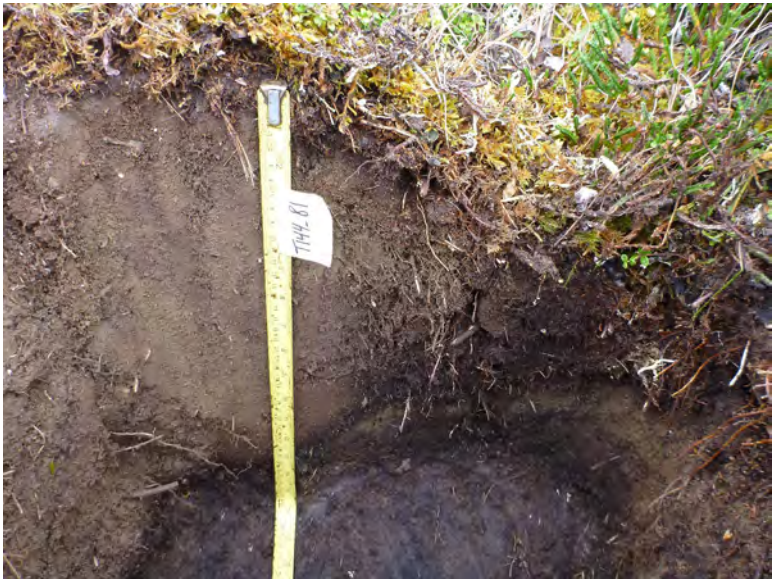

Representative photos (if available) for *Betula nana*–*Salix glauca*/*Vaccinium vitis-idaea*/*Saussurea angustifolia*. Top row: landscape photos, bottom row: ground photo (left), soil photo (right).

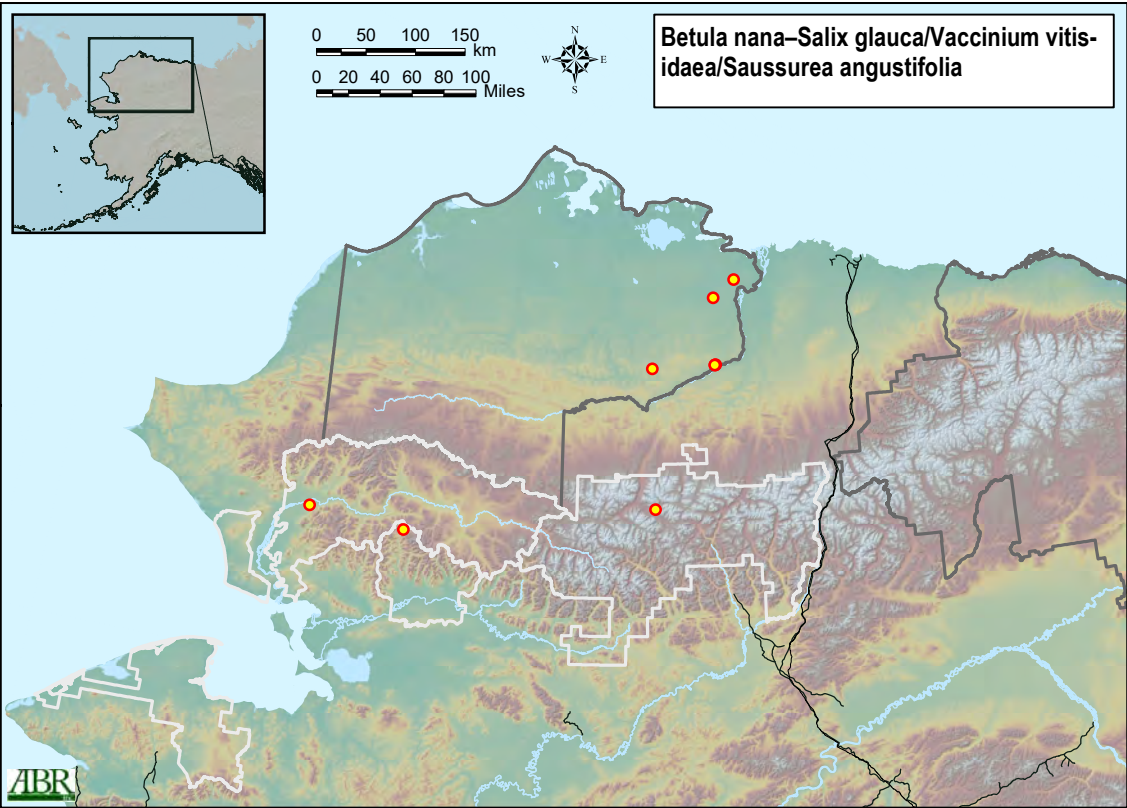

Distribution of *Betula nana*–*Salix glauca*/*Vaccinium vitis-idaea*/*Saussurea angustifolia* in the study area.



BETNAN–SALGLA/VACVIT/SAUANG: *Betula nana*–*Salix glauca*/*Vaccinium vitis-idaea*/*Saussurea angustifolia*, continued

|                                   | Avg. | Std Dev. | Percentile |      |      | n |
|-----------------------------------|------|----------|------------|------|------|---|
|                                   |      |          | 10th       | 50th | 90th |   |
| Elevation (m)                     | 231  | 292      | 29         | 169  | 476  | 7 |
| Slope (degrees)                   | 13   | 5        | 7          | 15   | 17   | 7 |
| Surface Organic Thickness (cm)    | 8.6  | 5.1      | 3.8        | 9.0  | 14.0 | 7 |
| Cumul. Org. Thickness (cm)        | 11.6 | 5.6      | 7.4        | 10.0 | 16.4 | 7 |
| Depth to >15% Rock Fragments (cm) | 18   | 9        | 10         | 21   | 24   | 4 |
| Water Table Depth (cm)            |      |          |            |      |      | 7 |
| Active Layer Thickness (cm)       | 39   | 10       | 31         | 42   | 47   | 3 |
| Site pH                           | 5.9  | 0.2      | 5.7        | 5.8  | 6.1  | 7 |
| Electrical Conductivity (uS/cm)   | 144  | 116      | 52         | 100  | 280  | 7 |
| Whole Tussock Cover (%)           | 0    | 0        | 0          | 0    | 0    | 7 |

Environmental data summaries for *Betula nana*–*Salix glauca*/*Vaccinium vitis-idaea*/*Saussurea angustifolia*.

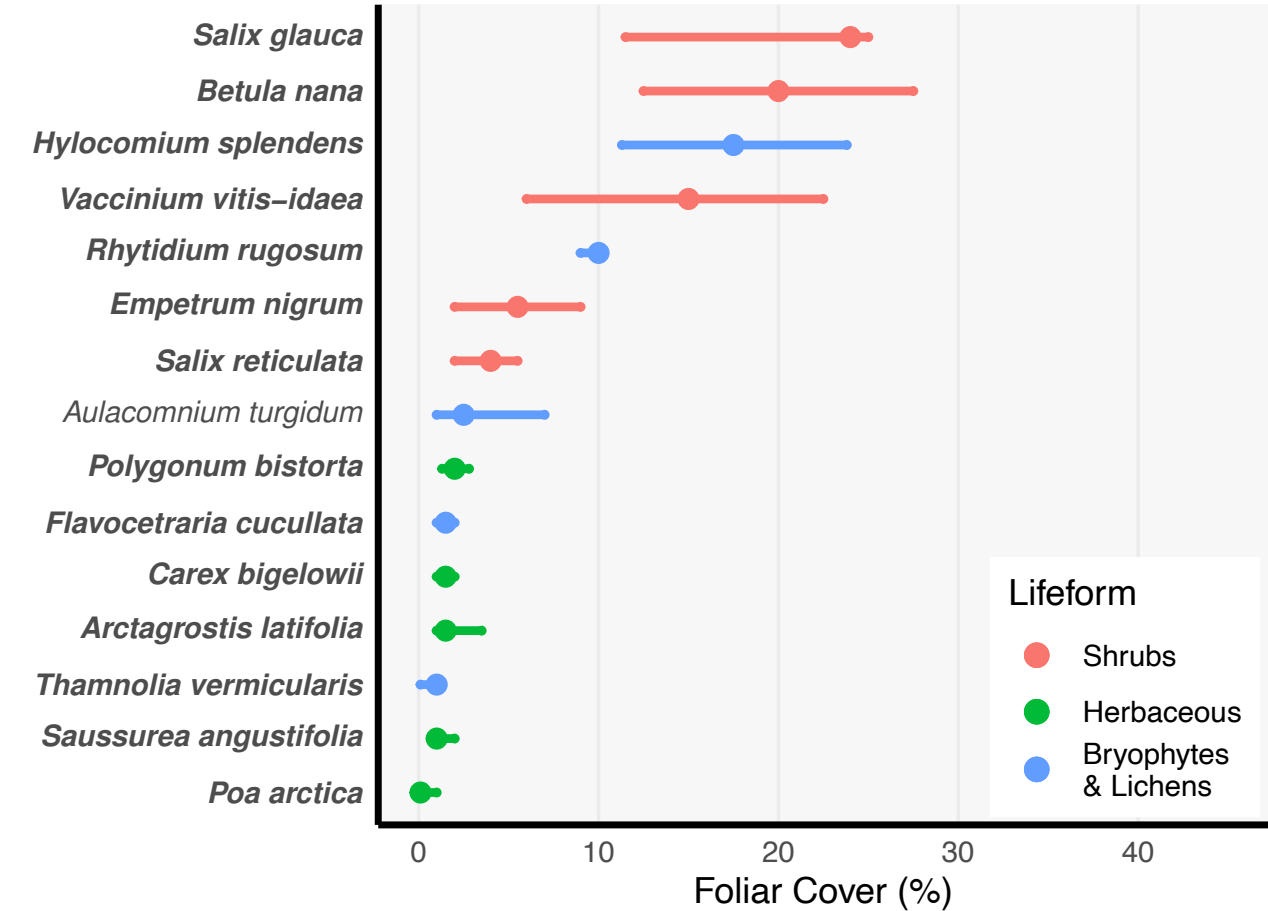

Median and 25th and 75th percentiles of foliar cover for the most common species in 3 lifeform groups in *Betula nana*–*Salix glauca*/*Vaccinium vitis-idaea*/*Saussurea angustifolia*. Latin names on y-axis in bold font occur in ≥70% of plots in this plant association.

| Lifeform         | Code   | USDA Scientific Name                           | Const. | Avg. | Std Dev. | Percentile |      |      |
|------------------|--------|------------------------------------------------|--------|------|----------|------------|------|------|
|                  |        |                                                |        |      |          | 10th       | 50th | 90th |
| Deciduous Shrubs | ARAL13 | <i>Arctous alpina</i>                          | 86     | 6.5  | 7.1      | 1.1        | 4.5  | 14.0 |
| Deciduous Shrubs | BENA   | <i>Betula nana</i>                             | 100    | 22.0 | 12.9     | 10.0       | 20.0 | 38.6 |
| Deciduous Shrubs | SAGL   | <i>Salix glauca</i>                            | 100    | 19.6 | 10.7     | 6.8        | 24.0 | 29.0 |
| Deciduous Shrubs | SAPH   | <i>Salix phlebophylla</i>                      | 43     | 3.7  | 3.8      | 1.2        | 2.0  | 6.8  |
| Deciduous Shrubs | SAPU15 | <i>Salix pulchra</i>                           | 43     | 5.3  | 4.5      | 1.8        | 5.0  | 9.0  |
| Deciduous Shrubs | SARE2  | <i>Salix reticulata</i>                        | 100    | 4.9  | 4.9      | 1.0        | 4.0  | 9.6  |
| Deciduous Shrubs | VAUL   | <i>Vaccinium uliginosum</i>                    | 71     | 8.8  | 4.5      | 4.8        | 7.0  | 13.8 |
| Evergreen Shrubs | CATE11 | <i>Cassiope tetragona</i>                      | 71     | 13.8 | 14.8     | 5.4        | 8.0  | 28.0 |
| Evergreen Shrubs | DRIN4  | <i>Dryas integrifolia</i>                      | 57     | 9.5  | 7.0      | 3.3        | 9.5  | 15.7 |
| Evergreen Shrubs | EMNI   | <i>Empetrum nigrum</i>                         | 86     | 5.5  | 4.0      | 1.0        | 5.5  | 10.0 |
| Evergreen Shrubs | LEPAD  | <i>Ledum palustre</i> ssp. <i>decumbens</i>    | 71     | 4.8  | 2.4      | 2.4        | 5.0  | 7.2  |
| Evergreen Shrubs | VAVI   | <i>Vaccinium vitis-idaea</i>                   | 100    | 15.3 | 10.1     | 5.0        | 15.0 | 27.0 |
| Forbs            | LUAR2  | <i>Lupinus arcticus</i>                        | 57     | 3.8  | 1.5      | 2.3        | 4.0  | 5.0  |
| Forbs            | POBIP2 | <i>Polygonum bistorta</i> ssp. <i>plumosum</i> | 86     | 2.2  | 1.7      | 1.0        | 2.0  | 4.0  |
| Forbs            | SAAN3  | <i>Saussurea angustifolia</i>                  | 100    | 1.4  | 1.0      | 1.0        | 1.0  | 2.4  |
| Grasses          | ARLA2  | <i>Arctagrostis latifolia</i>                  | 86     | 2.2  | 1.9      | 1.0        | 1.5  | 4.5  |
| Grasses          | POAR2  | <i>Poa arctica</i>                             | 100    | 0.1  | 0.4      | 0.1        | 0.1  | 1.0  |
| Sedges           | CABI5  | <i>Carex bigelowii</i>                         | 86     | 1.5  | 1.0      | 1.0        | 1.5  | 2.5  |
| Mosses           | AUTU70 | <i>Aulacomnium turgidum</i>                    | 57     | 5.5  | 7.1      | 1.0        | 2.5  | 12.4 |
| Mosses           | DIEL70 | <i>Dicranum elongatum</i>                      | 43     | 5.0  | 2.6      | 2.8        | 6.0  | 6.8  |
| Mosses           | HYSP70 | <i>Hylocomium splendens</i>                    | 86     | 17.3 | 7.1      | 9.5        | 17.5 | 25.0 |
| Mosses           | RHRU70 | <i>Rhytidium rugosum</i>                       | 71     | 13.4 | 9.3      | 8.4        | 10.0 | 22.0 |
| Lichens          | FLCU   | <i>Flavocetraria cucullata</i>                 | 86     | 2.5  | 2.7      | 1.0        | 1.5  | 5.0  |
| Lichens          | THVE60 | <i>Thamnolia vermicularis</i>                  | 71     | 1.0  | 0.8      | 0.1        | 1.0  | 1.6  |

Constancy and foliar cover data summaries for *Betula nana*–*Salix glauca*/*Vaccinium vitis-idaea*/*Saussurea angustifolia*. Constancy/cover summaries limited to taxa occurring in this plant association with a constancy ≥60 and average cover >0, or taxa with a constancy ≥40 and average cover ≥3.



**BETNAN–SALPUL1/CARAQU1–ERIAN1: *Betula nana*–*Salix pulchra*/*Carex aquatilis*–*Eriophorum angustifolium* (n = 7)**

The plant association *Betula nana*–*Salix pulchra*/*Carex aquatilis*–*Eriophorum angustifolium* occurs in Lowland physiography most commonly on the following geomorphic units: Lowland Loess; Lowland Headwater Floodplain; and Moraine, older. The average elevation in this plant association is 229 m ( $\pm 318$  m), and the slope gradient typically ranges between flat and nearly level. This plant association was associated most commonly with the surface form Nonpatterned, but is also regularly associated with High-centered, Low-relief Polygons; Low-centered, Low-relief, High-density Polygons; and Undifferentiated mounds. Soils are very poorly drained to poorly drained, surface organic thickness is typically moderately thick, coarse fragments are uncommon, but when they do occur the average top depth is 114 cm ( $\pm 122$  cm), and permafrost was common with an average active layer thickness of 34 cm ( $\pm 10$  cm). Water pH typically ranges from acidic to circumacidic, and the average electrical conductivity is 107  $\mu$ S/cm ( $\pm 74$   $\mu$ S/cm). The most common vegetation type is Open Low Shrub Birch-Willow. The vegetation is co-dominated by *Betula nana* and *Salix pulchra*, which typically form an open low shrub canopy. In the understory, *Carex aquatilis* and *Eriophorum angustifolium* are codominant. Other plant taxa that commonly occur in this plant association at low abundance include, the shrubs *Vaccinium uliginosum*, *Ledum palustre* ssp. *decumbens*, and *Vaccinium vitis-idaea*; the herbs *Eriophorum vaginatum*, *Pyrola grandiflora*, and *Carex bigelowii*; and the non-vasculars *Aulacomnium palustre*, *Aulacomnium turgidum*, *Sphagnum* sp., *Hylocomium splendens*, and *Tomentypnum nitens*. The soils in this plant association range from wet to flooded, and dwarf shrubs are generally limited to moist micro-highs.

A4366p: Arctic Ombrotrophic Wet Low Shrublands (proposed)

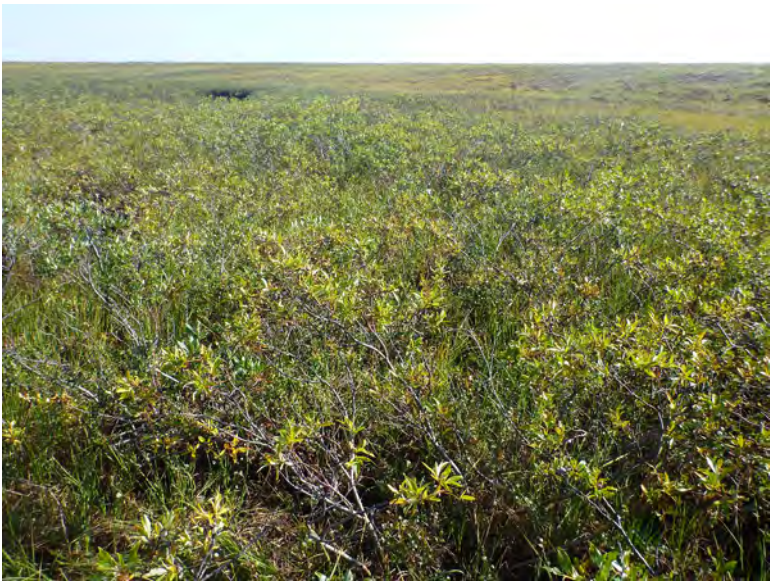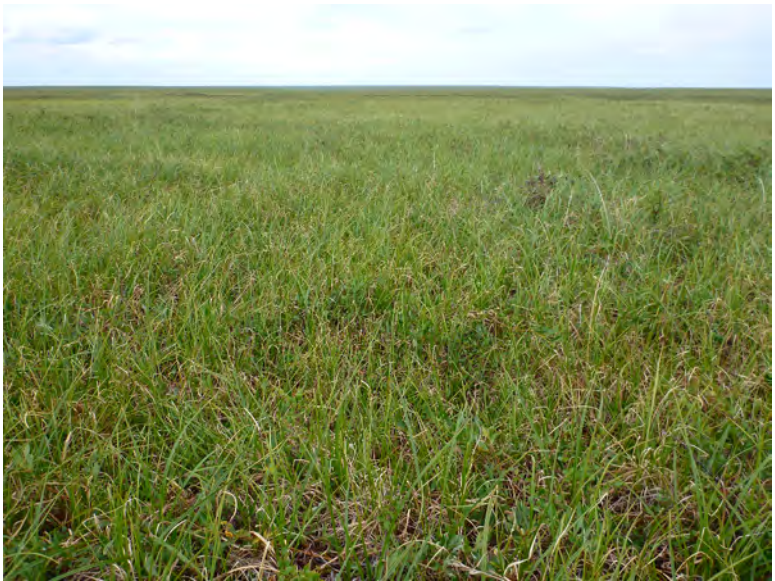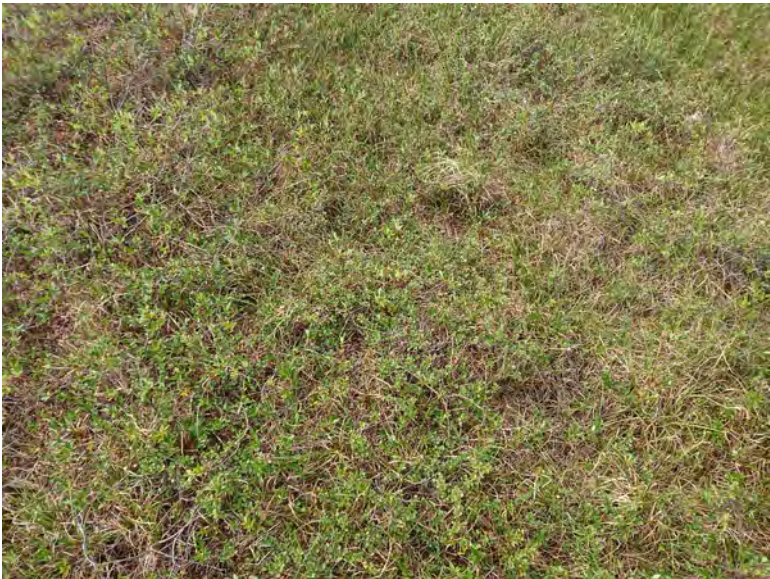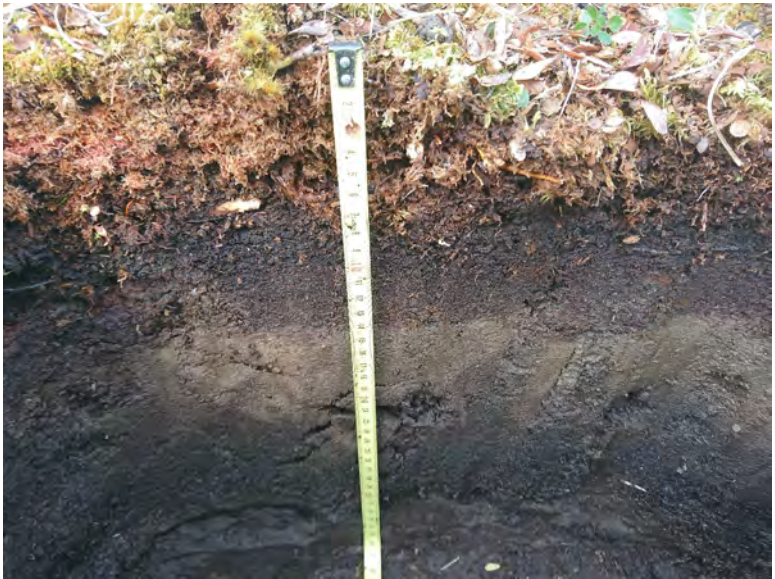

Representative photos (if available) for *Betula nana*–*Salix pulchra*/*Carex aquatilis*–*Eriophorum angustifolium*. Top row: landscape photos, bottom row: ground photo (left), soil photo (right).

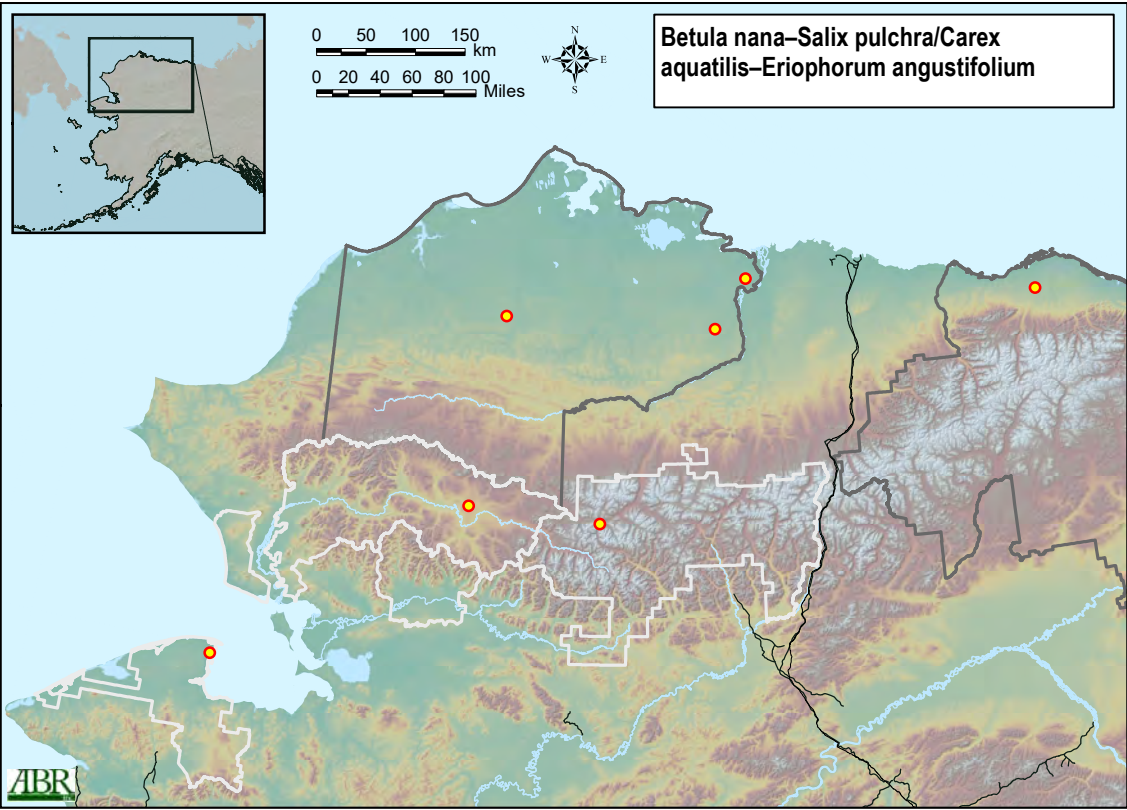

Distribution of *Betula nana*–*Salix pulchra*/*Carex aquatilis*–*Eriophorum angustifolium* in the study area.



BETNAN–SALPUL1/CARAQU1–ERIAN1: *Betula nana*–*Salix pulchra*/*Carex aquatilis*–*Eriophorum angustifolium*, continued

|                                   | Avg. | Std Dev. | Percentile |      |      | n |
|-----------------------------------|------|----------|------------|------|------|---|
|                                   |      |          | 10th       | 50th | 90th |   |
| Elevation (m)                     | 229  | 318      | 19         | 80   | 605  | 7 |
| Slope (degrees)                   | 1    | 1        | 0          | 0    | 1    | 7 |
| Surface Organic Thickness (cm)    | 23.6 | 8.3      | 16.4       | 21.0 | 32.2 | 7 |
| Cumul. Org. Thickness (cm)        | 25.1 | 7.2      | 19.8       | 24.0 | 32.2 | 7 |
| Depth to >15% Rock Fragments (cm) | 114  | 122      | 45         | 114  | 183  | 2 |
| Water Table Depth (cm)            | -14  | 12       | -27        | -8   | -5   | 5 |
| Active Layer Thickness (cm)       | 34   | 10       | 27         | 32   | 44   | 6 |
| Site pH                           | 5.7  | 0.5      | 5.2        | 5.6  | 6.3  | 7 |
| Electrical Conductivity (uS/cm)   | 107  | 74       | 40         | 90   | 200  | 7 |
| Whole Tussock Cover (%)           | 2    | 3        | 0          | 2    | 5    | 7 |

Environmental data summaries for *Betula nana*–*Salix pulchra*/*Carex aquatilis*–*Eriophorum angustifolium*.

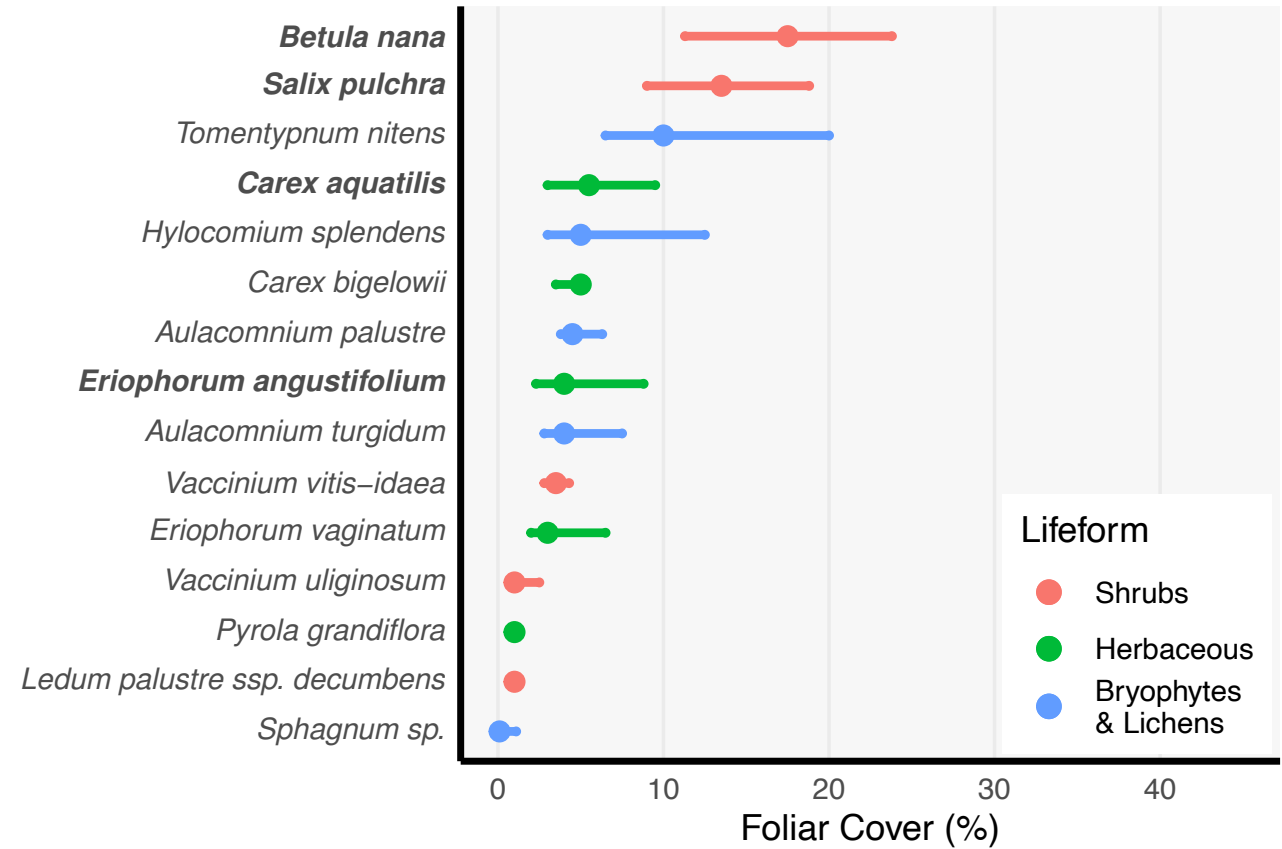

Median and 25th and 75th percentiles of foliar cover for the most common species in 3 lifeform groups in *Betula nana*–*Salix pulchra*/*Carex aquatilis*–*Eriophorum angustifolium*. Latin names on y-axis in bold font occur in ≥70% of plots in this plant association.

| Lifeform         | Code   | USDA Scientific Name                 | Const. | Avg. | Std Dev. | Percentile |      |      |
|------------------|--------|--------------------------------------|--------|------|----------|------------|------|------|
|                  |        |                                      |        |      |          | 10th       | 50th | 90th |
| Deciduous Shrubs | BENA   | <i>Betula nana</i>                   | 100    | 22.5 | 17.0     | 10.0       | 17.5 | 40.0 |
| Deciduous Shrubs | SAPU15 | <i>Salix pulchra</i>                 | 100    | 14.5 | 8.1      | 6.5        | 13.5 | 23.5 |
| Evergreen Shrubs | LEPAD  | <i>Ledum palustre ssp. decumbens</i> | 67     | 1.0  | 0.8      | 0.1        | 1.0  | 1.7  |
| Sedges           | CAAQ   | <i>Carex aquatilis</i>               | 100    | 6.8  | 5.1      | 2.5        | 5.5  | 12.5 |
| Sedges           | CABI5  | <i>Carex bigelowii</i>               | 50     | 4.0  | 1.7      | 2.6        | 5.0  | 5.0  |
| Sedges           | ERAN6  | <i>Eriophorum angustifolium</i>      | 100    | 7.0  | 7.0      | 2.0        | 4.0  | 15.0 |
| Sedges           | ERVA4  | <i>Eriophorum vaginatum</i>          | 50     | 4.7  | 4.7      | 1.4        | 3.0  | 8.6  |
| Mosses           | AUPA70 | <i>Aulacomnium palustre</i>          | 67     | 5.5  | 3.1      | 3.3        | 4.5  | 8.5  |
| Mosses           | AUTU70 | <i>Aulacomnium turgidum</i>          | 67     | 6.3  | 6.0      | 2.3        | 4.0  | 12.0 |
| Mosses           | HYSP70 | <i>Hylocomium splendens</i>          | 50     | 8.7  | 10.0     | 1.8        | 5.0  | 17.0 |
| Mosses           | TONI70 | <i>Tomentypnum nitens</i>            | 50     | 14.3 | 14.0     | 4.4        | 10.0 | 26.0 |

Constancy and foliar cover data summaries for *Betula nana*–*Salix pulchra*/*Carex aquatilis*–*Eriophorum angustifolium*. Constancy/cover summaries limited to taxa occurring in this plant association with a constancy ≥60 and average cover >0, or taxa with a constancy ≥40 and average cover ≥3.



**BETNAN–SALPUL1/ERIVAG: *Betula nana*–*Salix pulchra*/*Eriophorum vaginatum* (n = 31)**

A4345p: Arctic Nonacidic Shrub Tussock Tundra Alliance (proposed)

The plant association *Betula nana*–*Salix pulchra*/*Eriophorum vaginatum* occurs in Upland physiography most commonly on the following geomorphic units: Alluvial-Marine Deposit; Frozen Upland Silt; and Hillside Colluvium. The average elevation in this plant association is 134m ( $\pm 246$ m), and the slope gradient typically ranges between flat and nearly level. This plant association was associated most commonly with the surface form Nonpatterned, but is also regularly associated with High-centered, Low-relief Polygons; Mixed pits and polygons; and High-centered, High-relief Polygons. Soils are poorly drained to somewhat poorly drained, surface organic thickness typically ranges from thin to moderately thick, coarse fragments are rare, but when they do occur the average top depth is 54 cm ( $\pm 98$ cm), dominant soil texture in the upper 40 cm is typically Organic-rich or Loamy, and permafrost was common with an average active layer thickness of 29 cm ( $\pm 7$ cm). Soil pH is typically circumacidic, and the average electrical conductivity is 101  $\mu$ S/cm ( $\pm 73 \mu$ S/cm). The most common vegetation type is Open Mixed Low Shrub-Sedge Tussock Tundra. The vegetation is co-dominated by *Betula nana* and *Salix pulchra* which typically form an open low shrub canopy, and *Eriophorum vaginatum* forms conspicuous tussocks with a cover of whole tussocks of at least 25%. Other plant taxa that commonly occur in this plant association at low abundance include, the shrubs *Vaccinium vitis-idaea*, *Ledum palustre* ssp. *decumbens*, and *Cassiope tetragona*; the herbs *Carex bigelowii*, *Arctagrostis latifolia*, *Polygonum bistorta*, and *Saussurea angustifolia*; and the nonvasculars *Dactylina arctica*, *Aulacomnium turgidum*, *Flavocetraria cucullata*, *Hylocomium splendens*, and *Peltigera aphthosa*.

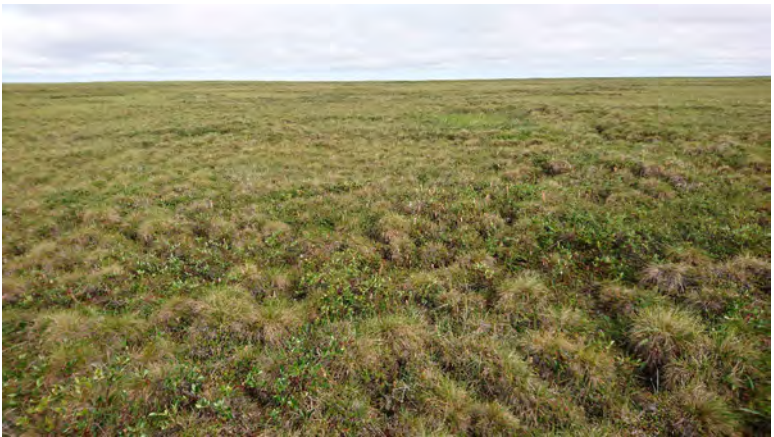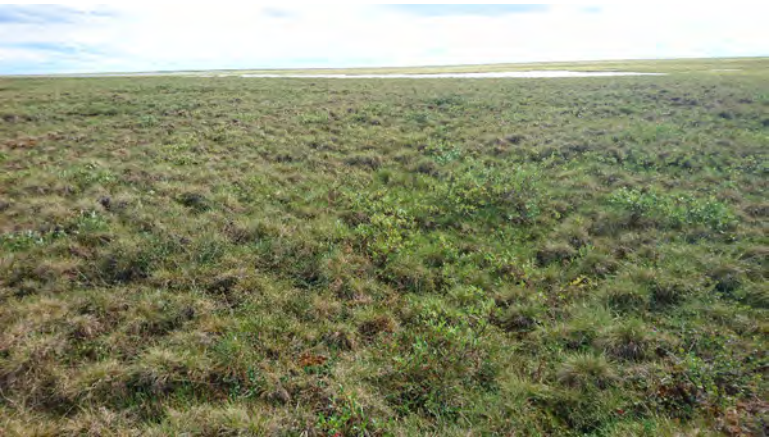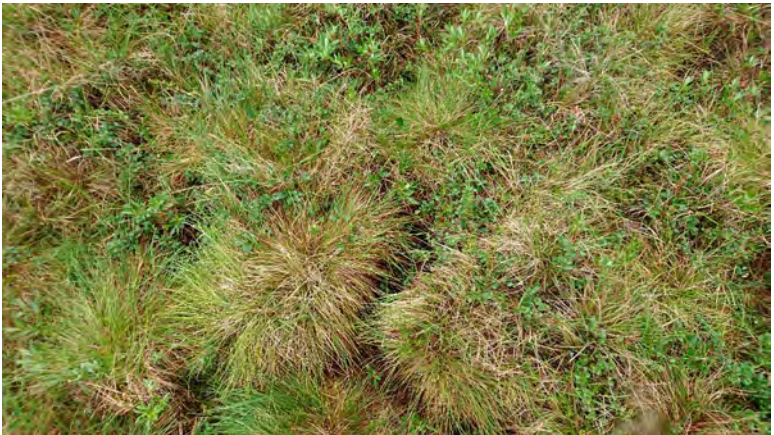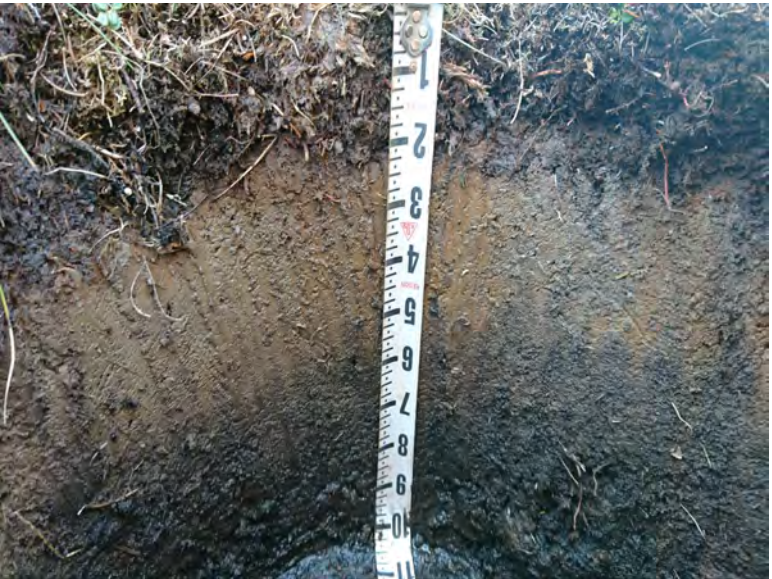

Representative photos (if available) for *Betula nana*–*Salix pulchra*/*Eriophorum vaginatum*. Top row: landscape photos, bottom row: ground photo (left), soil photo (right).

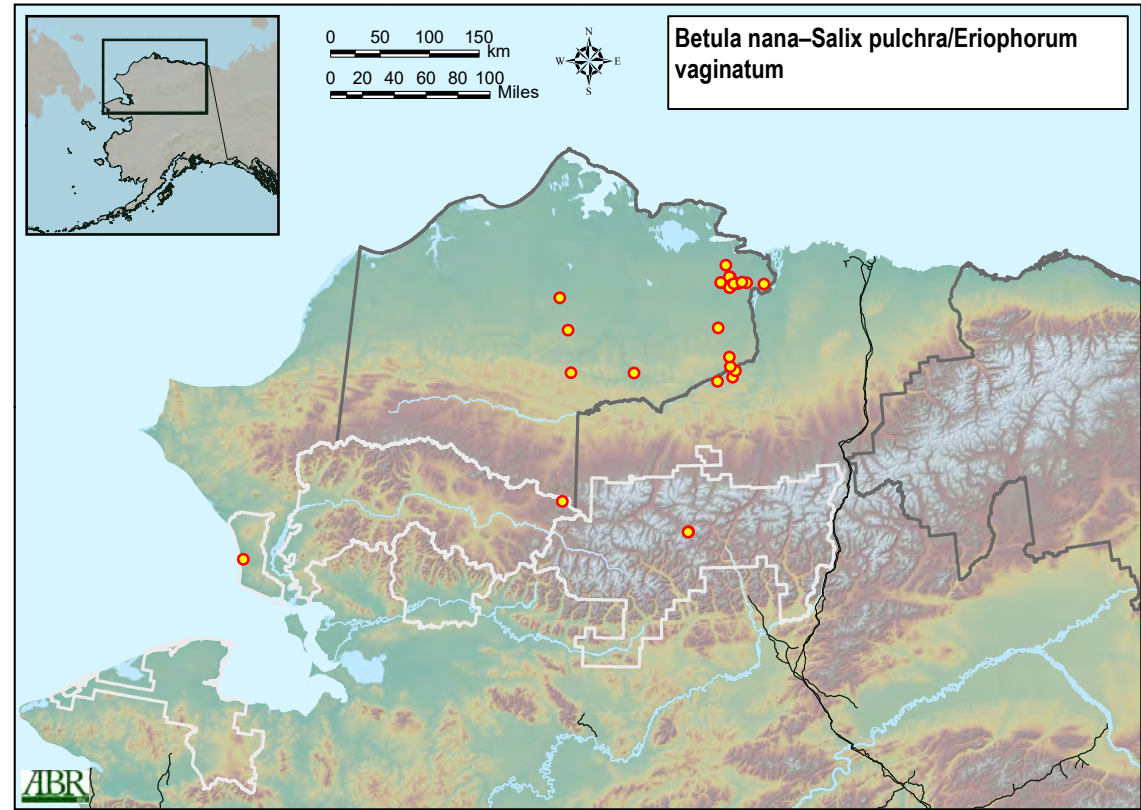

Distribution of *Betula nana*–*Salix pulchra*/*Eriophorum vaginatum* in the study area.



BETNAN–SALPUL1/ERIVAG: *Betula nana*–*Salix pulchra*/*Eriophorum vaginatum*, continued

|                                   | Avg. | Std Dev. | Percentile |      |      | n  |
|-----------------------------------|------|----------|------------|------|------|----|
|                                   |      |          | 10th       | 50th | 90th |    |
| Elevation (m)                     | 134  | 246      | 22         | 28   | 191  | 31 |
| Slope (degrees)                   | 2    | 3        | 0          | 1    | 5    | 30 |
| Surface Organic Thickness (cm)    | 13.0 | 6.8      | 5.0        | 11.4 | 22.0 | 31 |
| Cumul. Org. Thickness (cm)        | 16.1 | 6.6      | 6.4        | 16.5 | 24.1 | 31 |
| Depth to >15% Rock Fragments (cm) | 54   | 98       | 0          | 8    | 145  | 4  |
| Water Table Depth (cm)            | -23  | 9        | -31        | -23  | -16  | 17 |
| Active Layer Thickness (cm)       | 29   | 7        | 23         | 28   | 38   | 31 |
| Site pH                           | 5.9  | 0.4      | 5.5        | 5.8  | 6.4  | 30 |
| Electrical Conductivity (uS/cm)   | 101  | 73       | 40         | 80   | 176  | 30 |
| Whole Tussock Cover (%)           | 40   | 21       | 15         | 39   | 70   | 20 |

Environmental data summaries for *Betula nana*–*Salix pulchra*/*Eriophorum vaginatum*.

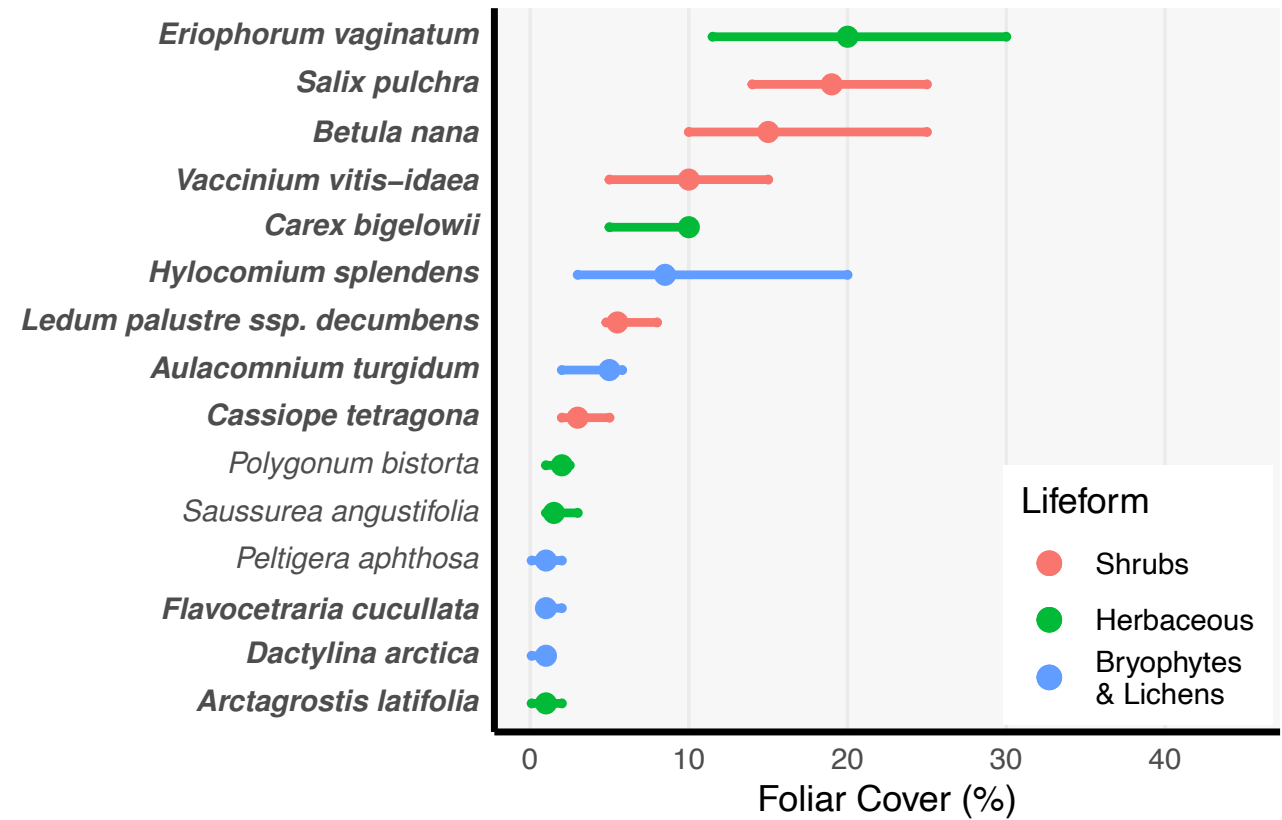

Median and 25th and 75th percentiles of foliar cover for the most common species in 3 lifeform groups in *Betula nana*–*Salix pulchra*/*Eriophorum vaginatum*. Latin names on y-axis in bold font occur in ≥70% of plots in this plant association.

| Lifeform         | Code   | USDA Scientific Name                    | Const. | Avg. | Std Dev. | Percentile |      |      |
|------------------|--------|-----------------------------------------|--------|------|----------|------------|------|------|
|                  |        |                                         |        |      |          | 10th       | 50th | 90th |
| Deciduous Shrubs | BENA   | <i>Betula nana</i>                      | 100    | 18.5 | 9.2      | 10.0       | 15.0 | 30.0 |
| Deciduous Shrubs | SAPU15 | <i>Salix pulchra</i>                    | 100    | 19.0 | 8.1      | 10.0       | 19.0 | 30.0 |
| Evergreen Shrubs | CATE11 | <i>Cassiope tetragona</i>               | 74     | 4.3  | 3.3      | 2.0        | 3.0  | 9.2  |
| Evergreen Shrubs | EMNI   | <i>Empetrum nigrum</i>                  | 48     | 3.4  | 2.0      | 1.4        | 3.0  | 6.0  |
| Evergreen Shrubs | LEPAD  | <i>Ledum palustre ssp. decumbens</i>    | 90     | 6.5  | 3.3      | 3.0        | 5.5  | 10.0 |
| Evergreen Shrubs | VAVI   | <i>Vaccinium vitis-idaea</i>            | 94     | 10.9 | 7.7      | 3.0        | 10.0 | 21.0 |
| Forbs            | POBIP2 | <i>Polygonum bistorta ssp. plumosum</i> | 61     | 1.9  | 1.4      | 0.1        | 2.0  | 3.4  |
| Grasses          | ARLA2  | <i>Arctagrostis latifolia</i>           | 74     | 1.4  | 1.4      | 0.1        | 1.0  | 3.0  |
| Sedges           | CABI5  | <i>Carex bigelowii</i>                  | 94     | 9.4  | 5.5      | 4.6        | 10.0 | 18.0 |
| Sedges           | ERVA4  | <i>Eriophorum vaginatum</i>             | 100    | 21.2 | 12.8     | 10.0       | 20.0 | 35.0 |
| Mosses           | AUPA70 | <i>Aulacomnium palustre</i>             | 45     | 4.0  | 3.2      | 1.0        | 3.0  | 9.1  |
| Mosses           | AUTU70 | <i>Aulacomnium turgidum</i>             | 84     | 6.1  | 7.5      | 1.0        | 5.0  | 11.0 |
| Mosses           | HYSP70 | <i>Hylocomium splendens</i>             | 90     | 11.5 | 10.9     | 1.7        | 8.5  | 26.5 |
| Mosses           | TONI70 | <i>Tomentypnum nitens</i>               | 55     | 4.1  | 3.9      | 0.1        | 3.0  | 10.0 |
| Liverworts       | PTCI   | <i>Ptilidium ciliare</i>                | 65     | 5.5  | 7.8      | 0.1        | 2.5  | 13.0 |
| Lichens          | DAAR60 | <i>Dactylina arctica</i>                | 74     | 1.0  | 1.3      | 0.1        | 1.0  | 1.8  |
| Lichens          | FLCU   | <i>Flavocetraria cucullata</i>          | 94     | 1.6  | 1.4      | 0.1        | 1.0  | 3.0  |
| Lichens          | PEAP60 | <i>Peltigera aphthosa</i>               | 68     | 1.3  | 1.3      | 0.1        | 1.0  | 2.0  |
| Lichens          | THVE60 | <i>Thamnolia vermicularis</i>           | 61     | 1.2  | 1.3      | 0.1        | 1.0  | 2.4  |

Constancy and foliar cover data summaries for *Betula nana*–*Salix pulchra*/*Eriophorum vaginatum*. Constancy/cover summaries limited to taxa occurring in this plant association with a constancy ≥60 and average cover >0, or taxa with a constancy ≥40 and average cover ≥3.



**BETNAN–SALPUL1/PETFRI: *Betula nana*–*Salix pulchra*/*Petasites frigidus* (n = 10)**

A4339: Arctic Dwarf Birch Low Shrub Tundra Alliance

The plant association *Betula nana*–*Salix pulchra*/*Petasites frigidus* occurs in Lowland physiography most commonly on the following geomorphic units: Thaw Basin, ice-rich center and Hillside Colluvium. The average elevation in this plant association is 292 m ( $\pm 383$  m), and the slope gradient typically ranges between flat and gently sloping. This plant association was associated most commonly with the surface form Hummocks, but is also regularly associated with Nonpatterned; Beads; and Gelifluction lobes. Soils are poorly drained to somewhat poorly drained, surface organic thickness typically ranges from thin to moderately thick, coarse fragments are absent, dominant soil texture in the upper 40 cm is typically Loamy or Organic-rich, and permafrost was common with an average active layer thickness of 28 cm ( $\pm 12$  cm). Soil pH typically ranges from acidic to circumacidic, and the average electrical conductivity is 58  $\mu\text{S}/\text{cm}$  ( $\pm 36 \mu\text{S}/\text{cm}$ ). The most common vegetation types include Closed Low Shrub Birch-Willow and Open Low Shrub Birch-Willow. The vegetation is co-dominated by *Betula nana* and *Salix pulchra*, and *Petasites frigidus* is always present at low to moderate cover in the understory. Other plant taxa that commonly occur in this plant association at low abundance include, the shrubs *Vaccinium uliginosum*, *Vaccinium vitis-idaea*, and *Ledum palustre* ssp. *decumbens*; the herbs *Carex bigelowii*, *Arctagrostis latifolia*, *Poa arctica*, and *Eriophorum vaginatum*; and the nonvasculars *Aulacomnium turgidum*, *Cladonia* sp., *Aulacomnium palustre*, *Hylocomium splendens*, and *Flavocetraria cucullata*.

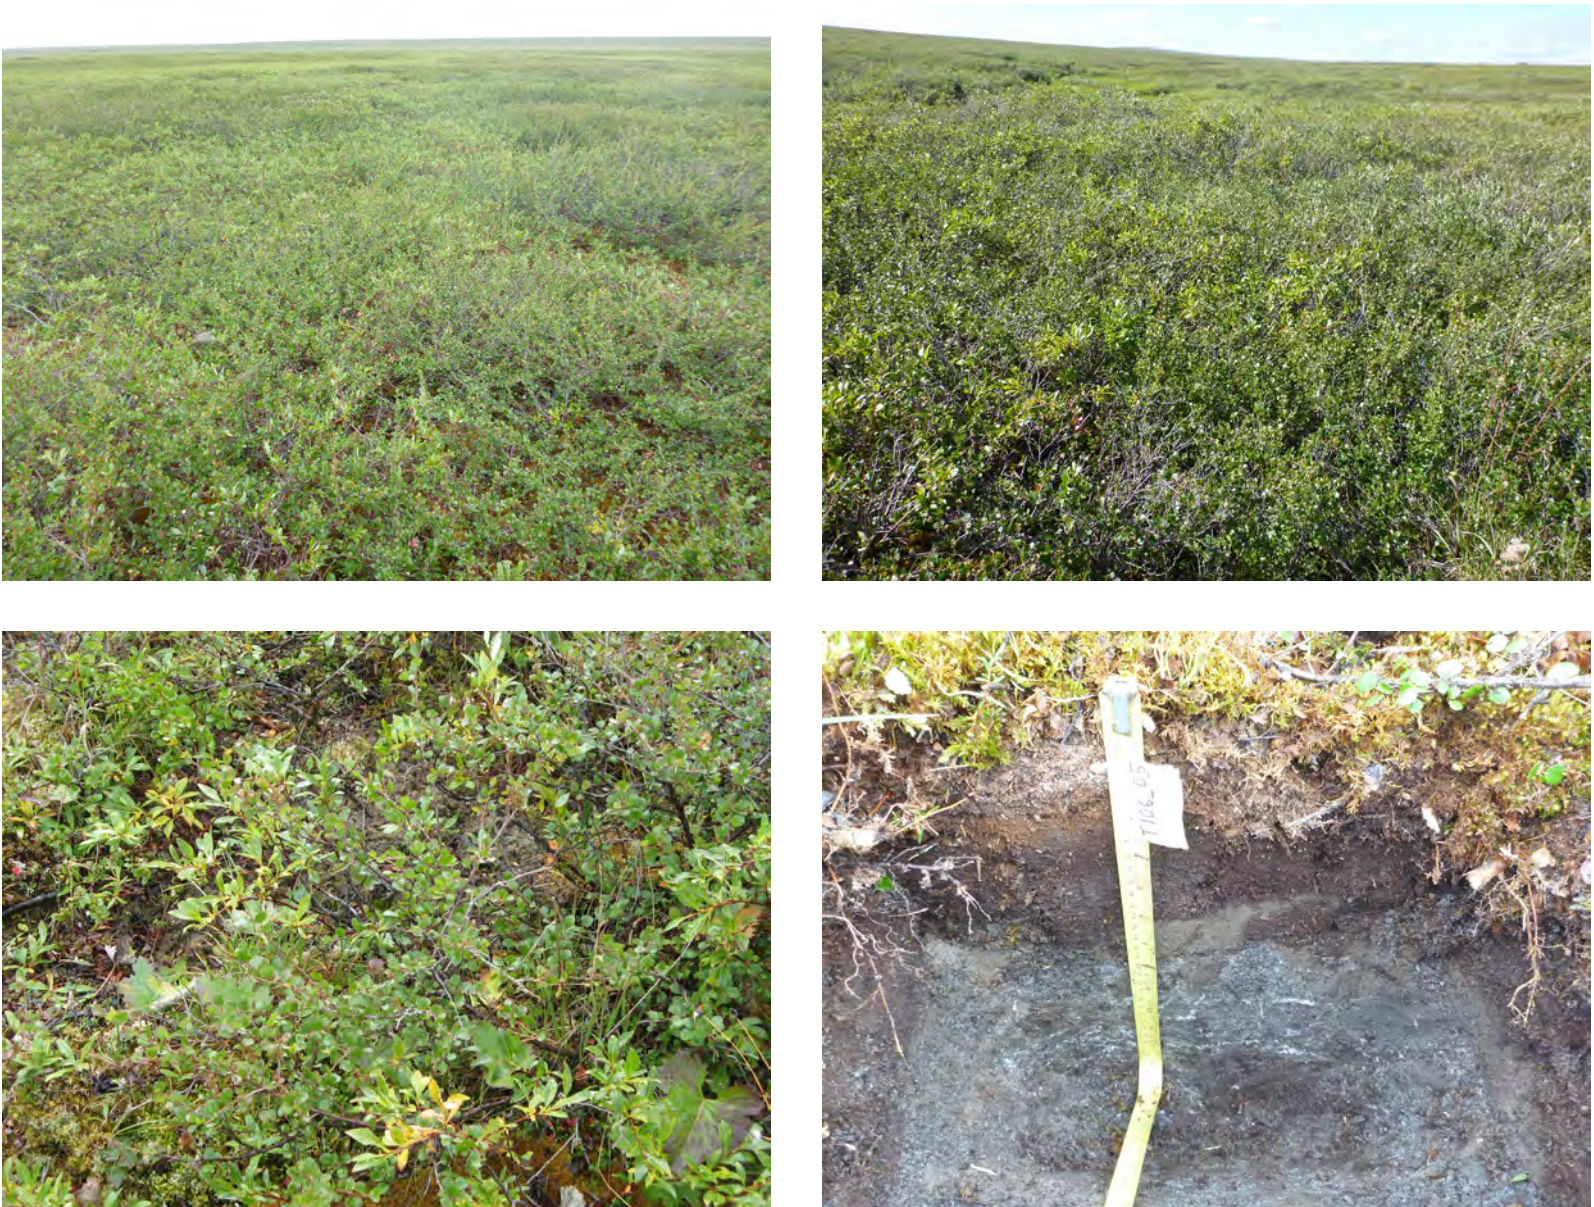

Representative photos (if available) for *Betula nana*–*Salix pulchra*/*Petasites frigidus*. Top row: landscape photos, bottom row: ground photo (left), soil photo (right).

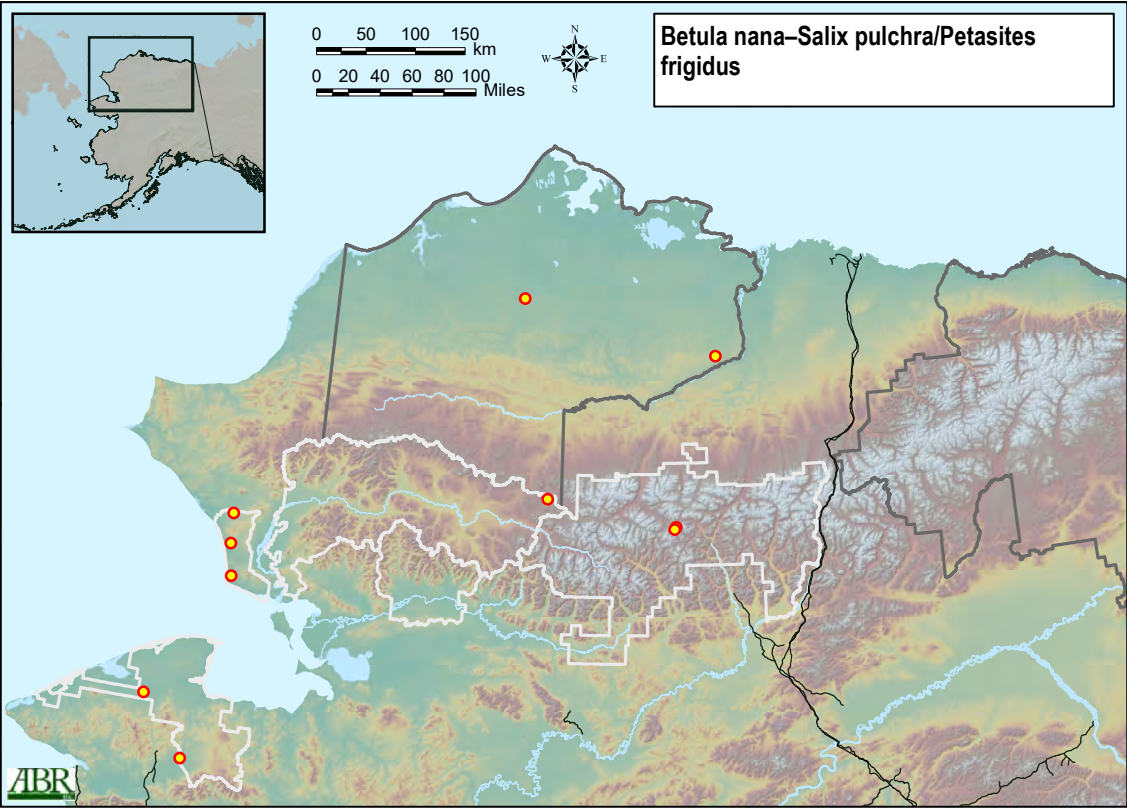

Distribution of *Betula nana*–*Salix pulchra*/*Petasites frigidus* in the study area.



BETNAN–SALPUL1/PETFRI: *Betula nana*–*Salix pulchra*/*Petasites frigidus*, continued

|                                   | Avg. | Std Dev. | Percentile |      |      | n  |
|-----------------------------------|------|----------|------------|------|------|----|
|                                   |      |          | 10th       | 50th | 90th |    |
| Elevation (m)                     | 292  | 383      | 26         | 86   | 927  | 10 |
| Slope (degrees)                   | 3    | 5        | 0          | 1    | 8    | 10 |
| Surface Organic Thickness (cm)    | 14.4 | 8.6      | 4.8        | 14.0 | 21.2 | 10 |
| Cumul. Org. Thickness (cm)        | 13.9 | 8.8      | 4.8        | 13.0 | 22.4 | 9  |
| Depth to >15% Rock Fragments (cm) | 200  | 0        | 200        | 200  | 200  | 4  |
| Water Table Depth (cm)            | -21  | 7        | -29        | -19  | -15  | 6  |
| Active Layer Thickness (cm)       | 28   | 12       | 19         | 25   | 36   | 9  |
| Site pH                           | 5.7  | 0.4      | 5.1        | 5.8  | 6.2  | 10 |
| Electrical Conductivity (uS/cm)   | 58   | 36       | 29         | 40   | 120  | 10 |
| Whole Tussock Cover (%)           | 1    | 2        | 0          | 0    | 3    | 10 |

Environmental data summaries for *Betula nana*–*Salix pulchra*/*Petasites frigidus*.

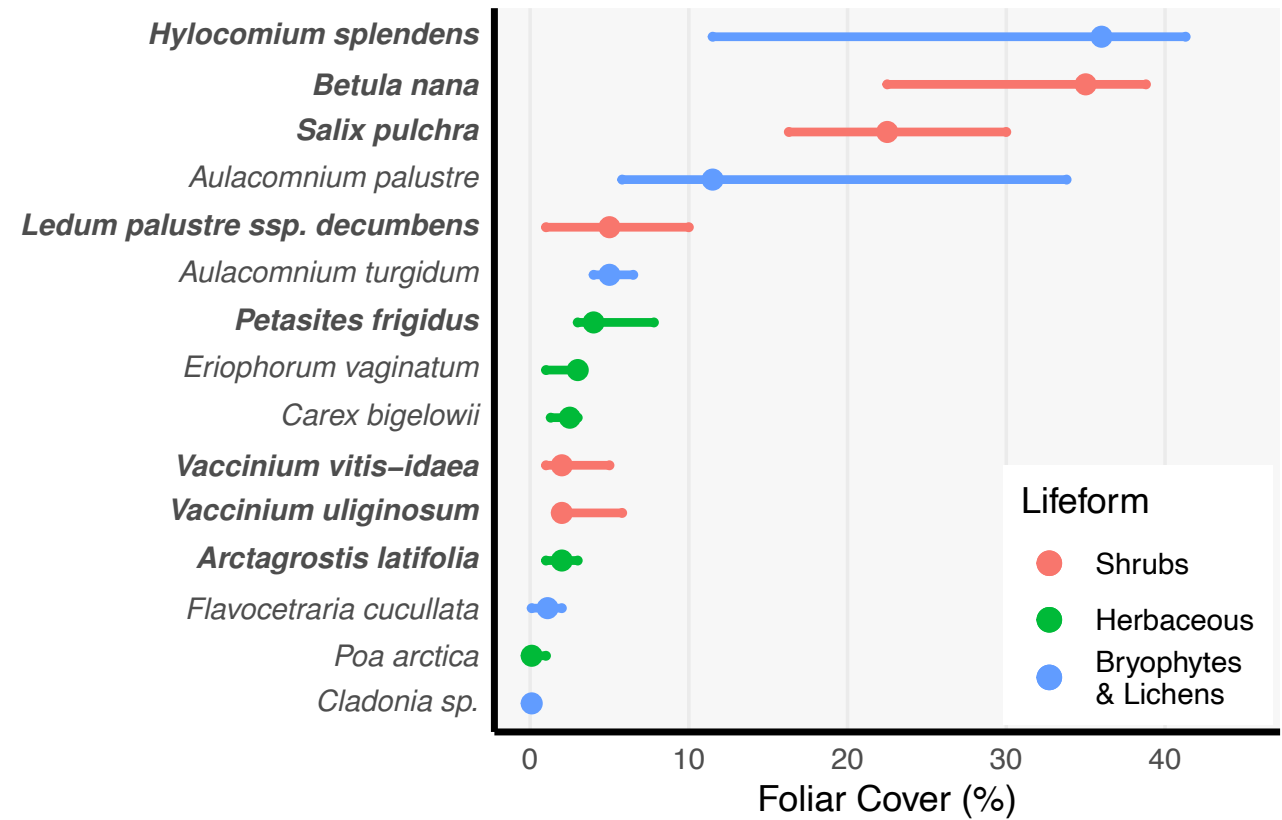

Median and 25th and 75th percentiles of foliar cover for the most common species in 3 lifeform groups in *Betula nana*–*Salix pulchra*/*Petasites frigidus*. Latin names on y-axis in bold font occur in ≥70% of plots in this plant association.

| Lifeform         | Code   | USDA Scientific Name                 | Const. | Avg. | Std Dev. | Percentile |      |      |
|------------------|--------|--------------------------------------|--------|------|----------|------------|------|------|
|                  |        |                                      |        |      |          | 10th       | 50th | 90th |
| Deciduous Shrubs | BENA   | <i>Betula nana</i>                   | 100    | 33.8 | 12.5     | 19.8       | 35.0 | 50.5 |
| Deciduous Shrubs | SAPU15 | <i>Salix pulchra</i>                 | 100    | 23.5 | 10.8     | 10.0       | 22.5 | 31.5 |
| Deciduous Shrubs | VAUL   | <i>Vaccinium uliginosum</i>          | 80     | 4.0  | 3.3      | 1.7        | 2.0  | 8.6  |
| Evergreen Shrubs | EMNI   | <i>Empetrum nigrum</i>               | 40     | 3.5  | 4.5      | 0.1        | 2.0  | 7.9  |
| Evergreen Shrubs | LEPAD  | <i>Ledum palustre ssp. decumbens</i> | 90     | 5.1  | 4.1      | 1.0        | 5.0  | 10.0 |
| Evergreen Shrubs | VAVI   | <i>Vaccinium vitis-idaea</i>         | 90     | 4.6  | 4.9      | 1.0        | 2.0  | 11.0 |
| Forbs            | PEFR5  | <i>Petasites frigidus</i>            | 100    | 5.2  | 3.3      | 1.9        | 4.0  | 10.0 |
| Grasses          | ARLA2  | <i>Arctagrostis latifolia</i>        | 80     | 1.9  | 1.4      | 0.1        | 2.0  | 3.3  |
| Grasses          | POAR2  | <i>Poa arctica</i>                   | 70     | 0.1  | 0.5      | 0.1        | 0.1  | 1.0  |
| Sedges           | CABI5  | <i>Carex bigelowii</i>               | 60     | 3.0  | 2.6      | 1.0        | 2.5  | 5.5  |
| Sedges           | ERVA4  | <i>Eriophorum vaginatum</i>          | 60     | 2.0  | 1.5      | 0.1        | 3.0  | 3.0  |
| Mosses           | AUPA70 | <i>Aulacomnium palustre</i>          | 60     | 18.7 | 17.8     | 3.5        | 11.5 | 41.0 |
| Mosses           | AUTU70 | <i>Aulacomnium turgidum</i>          | 70     | 5.3  | 2.9      | 2.2        | 5.0  | 8.2  |
| Mosses           | DICRA8 | <i>Dicranum sp.</i>                  | 40     | 3.3  | 4.5      | 1.0        | 1.0  | 7.3  |
| Mosses           | HYSP70 | <i>Hylocomium splendens</i>          | 80     | 32.4 | 23.2     | 8.5        | 36.0 | 54.0 |
| Mosses           | PLSC70 | <i>Pleurozium schreberi</i>          | 40     | 6.3  | 9.4      | 0.1        | 2.6  | 15.5 |
| Mosses           | POJU70 | <i>Polytrichum juniperinum</i>       | 40     | 4.5  | 4.0      | 1.3        | 3.5  | 8.5  |
| Lichens          | CLADO3 | <i>Cladonia sp.</i>                  | 70     | 0.1  | 0.7      | 0.1        | 0.1  | 1.0  |
| Lichens          | FLCU   | <i>Flavocetraria cucullata</i>       | 60     | 1.1  | 1.0      | 0.1        | 1.1  | 2.0  |

Constancy and foliar cover data summaries for *Betula nana*–*Salix pulchra*/*Petasites frigidus*. Constancy/cover summaries limited to taxa occurring in this plant association with a constancy ≥60 and average cover >0, or taxa with a constancy ≥40 and average cover ≥3.



**ERIVAG/DRYINT: *Eriophorum vaginatum*/Dryas integrifolia (n = 31)**

The plant association *Eriophorum vaginatum*/Dryas integrifolia occurs in Upland physiography most commonly on the following geomorphic units: Alluvial-Marine Deposit; Frozen Upland Silt; and Thaw Basin, ice-rich center. The average elevation in this plant association is 64 m ( $\pm 71$  m), and the slope gradient typically ranges between flat and nearly level. This plant association was associated most commonly with the surface form Nonpatterned, but is also regularly associated with High-centered, Low-relief Polygons; Mixed pits and polygons; and Mixed High and Low-centered Polygons. Soils are poorly drained to moderately well drained, surface organic thickness typically ranges from thin to moderately thick, coarse fragments are uncommon, but when they do occur the average top depth is 34 cm ( $\pm 18$  cm), dominant soil texture in the upper 40 cm is typically Loamy or Organic-rich, and permafrost was common with an average active layer thickness of 38 cm ( $\pm 8$  cm). Soil pH typically ranges from circumacidic to circumalkaline, and the average electrical conductivity is 272  $\mu$ S/cm ( $\pm 213$   $\mu$ S/cm). The most common vegetation types include Tussock Tundra-Dryas and Tussock Tundra. *Eriophorum vaginatum* dominates the site, forming conspicuous tussocks with a cover of whole tussocks of at least 25%. Between the tussocks *Dryas integrifolia* is always present at moderate to high cover. Other plant taxa that commonly occur in this plant association at low abundance include, the shrubs *Cassiope tetragona*, *Salix richardsonii*, *Salix pulchra*, and *Salix reticulata*; the herbs *Saussurea angustifolia*, *Eriophorum angustifolium*, *Arctagrostis latifolia*, and *Carex bigelowii*; and the nonvasculars *Ptilidium ciliare*, *Tomentypnum nitens*, *Hylocomium splendens*, *Flavocetraria cucullata*, and *Aulacomnium turgidum*.

A4347p: Arctic Nonacidic Tussock Tundra Alliance (proposed)

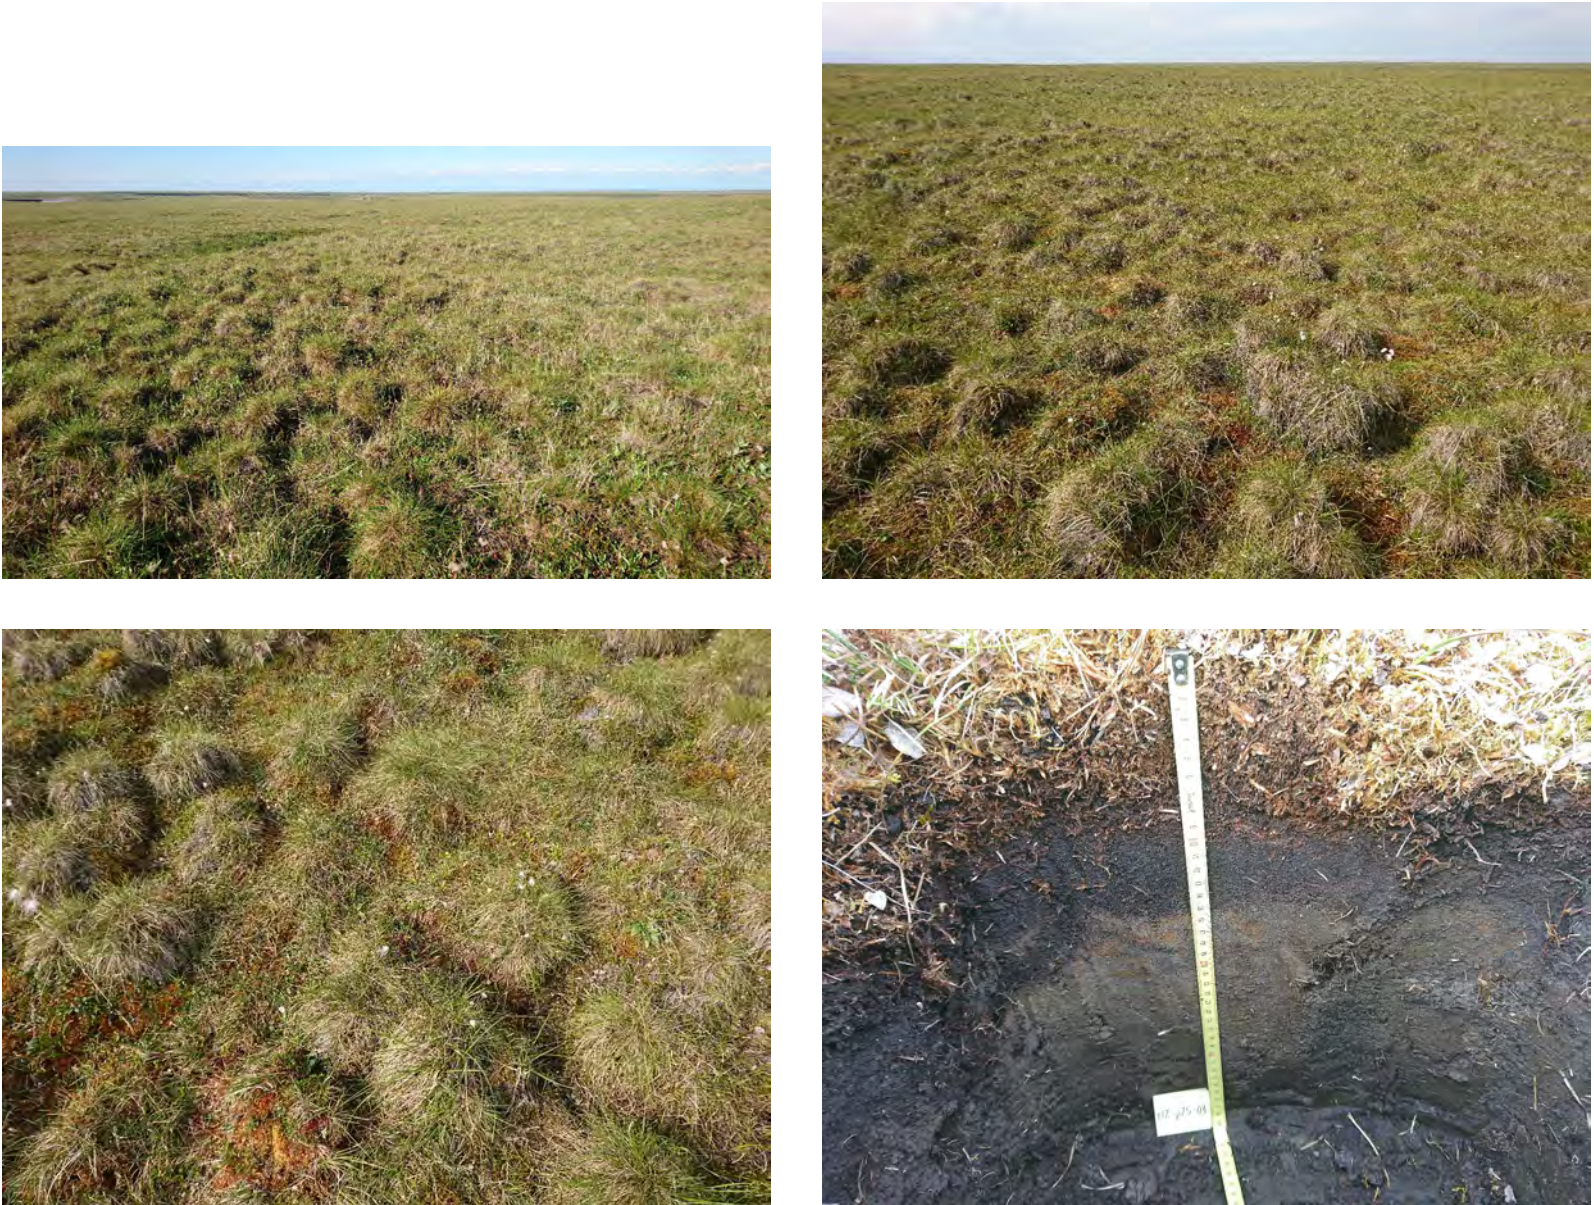

Representative photos (if available) for *Eriophorum vaginatum*/Dryas integrifolia. Top row: landscape photos, bottom row: ground photo (left), soil photo (right).

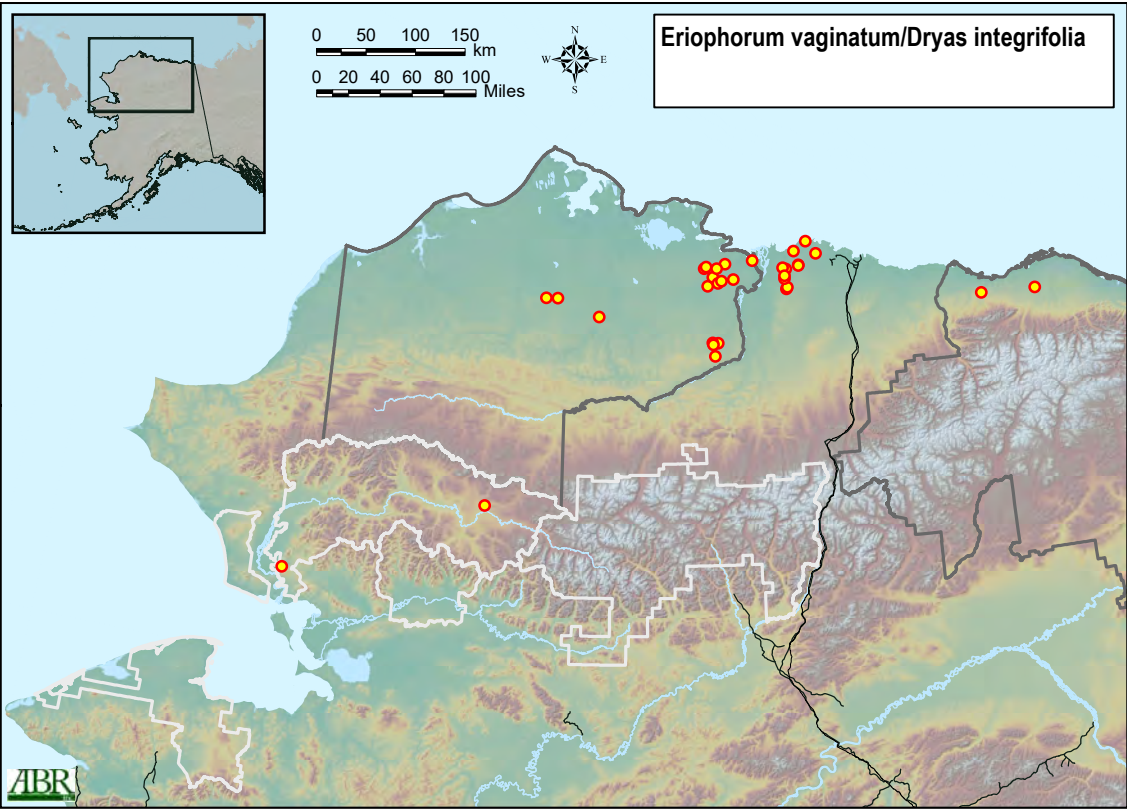

Distribution of *Eriophorum vaginatum*/Dryas integrifolia in the study area.



ERIVAG/DRYINT: *Eriophorum vaginatum*/*Dryas integrifolia*, continued

|                                   | Avg. | Std Dev. | Percentile |      |      | n  |
|-----------------------------------|------|----------|------------|------|------|----|
|                                   |      |          | 10th       | 50th | 90th |    |
| Elevation (m)                     | 64   | 71       | 16         | 34   | 117  | 28 |
| Slope (degrees)                   | 1    | 1        | 0          | 0    | 3    | 28 |
| Surface Organic Thickness (cm)    | 12.3 | 6.3      | 5.0        | 12.0 | 22.9 | 31 |
| Cumul. Org. Thickness (cm)        | 15.8 | 9.5      | 5.6        | 14.0 | 30.0 | 29 |
| Depth to >15% Rock Fragments (cm) | 34   | 18       | 18         | 32   | 50   | 7  |
| Water Table Depth (cm)            | -27  | 9        | -37        | -27  | -16  | 18 |
| Active Layer Thickness (cm)       | 38   | 8        | 30         | 37   | 45   | 19 |
| Site pH                           | 6.7  | 0.7      | 5.8        | 6.6  | 7.2  | 29 |
| Electrical Conductivity (uS/cm)   | 272  | 213      | 88         | 210  | 570  | 29 |
| Whole Tussock Cover (%)           | 28   | 13       | 15         | 25   | 40   | 21 |

Environmental data summaries for *Eriophorum vaginatum*/*Dryas integrifolia*.

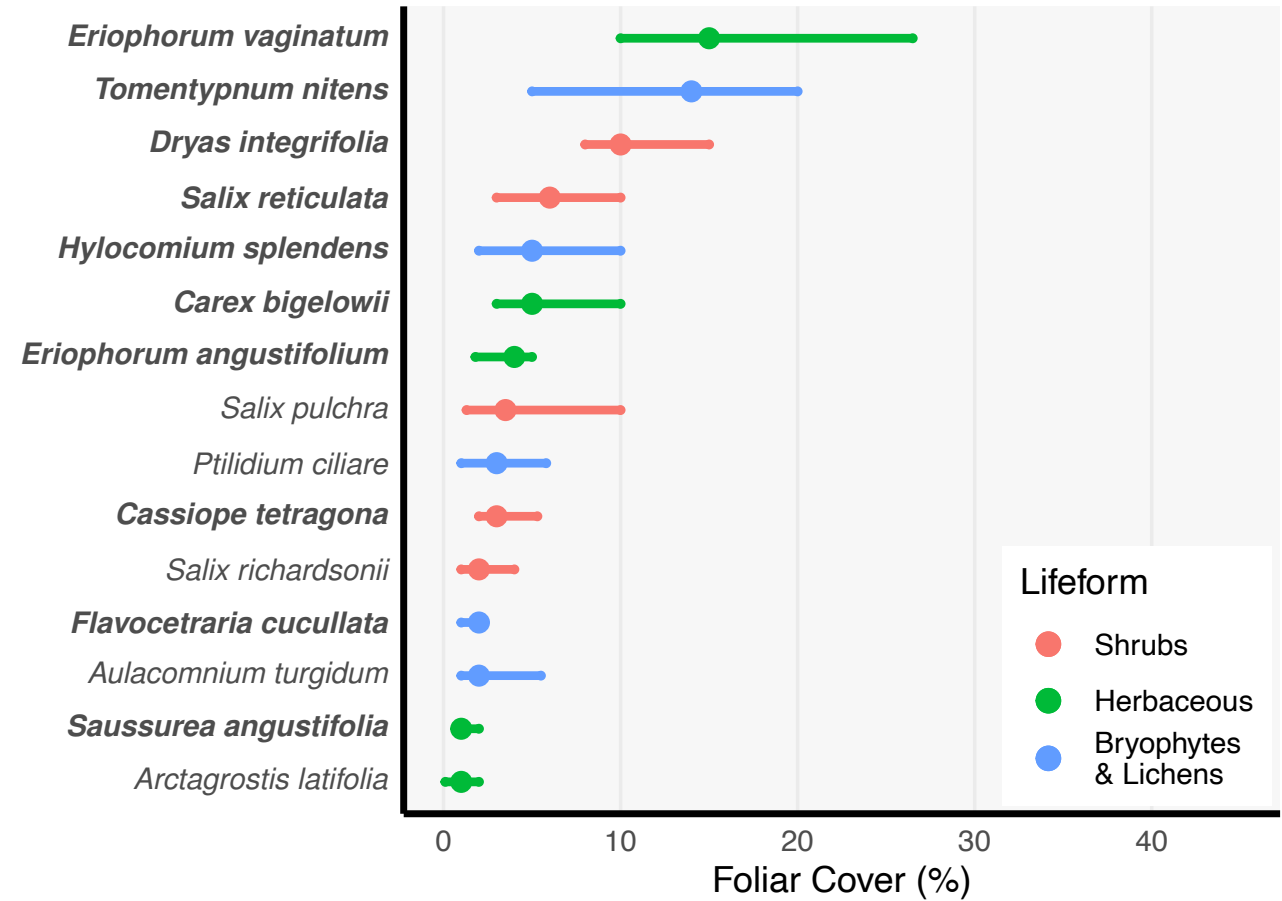

Median and 25th and 75th percentiles of foliar cover for the most common species in 3 lifeform groups in *Eriophorum vaginatum*/*Dryas integrifolia*. Latin names on y-axis in bold font occur in ≥70% of plots in this plant association.

| Lifeform         | Code   | USDA Scientific Name            | Const. | Avg. | Std Dev. | Percentile |      |      |
|------------------|--------|---------------------------------|--------|------|----------|------------|------|------|
|                  |        |                                 |        |      |          | 10th       | 50th | 90th |
| Deciduous Shrubs | SAAR27 | <i>Salix arctica</i>            | 52     | 4.8  | 3.3      | 1.0        | 5.0  | 10.0 |
| Deciduous Shrubs | SAPU15 | <i>Salix pulchra</i>            | 58     | 5.7  | 4.9      | 1.0        | 3.5  | 12.0 |
| Deciduous Shrubs | SARE2  | <i>Salix reticulata</i>         | 94     | 7.3  | 4.9      | 2.0        | 6.0  | 15.0 |
| Deciduous Shrubs | SARI4  | <i>Salix richardsonii</i>       | 61     | 3.0  | 3.1      | 0.1        | 2.0  | 7.6  |
| Evergreen Shrubs | CATE11 | <i>Cassiope tetragona</i>       | 90     | 5.0  | 5.1      | 1.0        | 3.0  | 11.5 |
| Evergreen Shrubs | DRIN4  | <i>Dryas integrifolia</i>       | 100    | 13.5 | 7.6      | 7.0        | 10.0 | 20.0 |
| Forbs            | POVI3  | <i>Polygonum viviparum</i>      | 61     | 1.0  | 0.4      | 0.1        | 0.1  | 1.0  |
| Forbs            | SAAN3  | <i>Saussurea angustifolia</i>   | 81     | 2.2  | 3.2      | 0.1        | 1.0  | 4.2  |
| Grasses          | ARLA2  | <i>Arctagrostis latifolia</i>   | 68     | 1.2  | 1.4      | 0.1        | 1.0  | 3.0  |
| Grasses          | POAR2  | <i>Poa arctica</i>              | 61     | 1.0  | 1.1      | 0.1        | 1.0  | 1.0  |
| Sedges           | CABI5  | <i>Carex bigelowii</i>          | 100    | 7.0  | 6.1      | 2.0        | 5.0  | 15.0 |
| Sedges           | ERAN6  | <i>Eriophorum angustifolium</i> | 77     | 4.4  | 5.1      | 0.1        | 4.0  | 7.7  |
| Sedges           | ERVA4  | <i>Eriophorum vaginatum</i>     | 100    | 20.5 | 13.7     | 7.0        | 15.0 | 40.0 |
| Mosses           | AUTU70 | <i>Aulacomnium turgidum</i>     | 65     | 5.6  | 7.0      | 0.1        | 2.0  | 15.5 |
| Mosses           | HYSP70 | <i>Hylocomium splendens</i>     | 90     | 7.7  | 7.3      | 1.0        | 5.0  | 20.0 |
| Mosses           | TONI70 | <i>Tomentypnum nitens</i>       | 94     | 15.5 | 14.5     | 4.0        | 14.0 | 27.0 |
| Liverworts       | PTCI   | <i>Ptilidium ciliare</i>        | 58     | 4.5  | 5.8      | 1.0        | 3.0  | 7.9  |
| Lichens          | FLCU   | <i>Flavocetraria cucullata</i>  | 81     | 2.1  | 1.8      | 1.0        | 2.0  | 4.6  |

Constancy and foliar cover data summaries for *Eriophorum vaginatum*/*Dryas integrifolia*. Constancy/cover summaries limited to taxa occurring in this plant association with a constancy ≥60 and average cover >0, or taxa with a constancy ≥40 and average cover ≥3.



**ERIVAG/LEDDEC–VACVIT: *Eriophorum vaginatum*/Ledum palustre ssp. decumbens–Vaccinium vitis-idaea (n = 45)**

A4346p: Arctic Acidic Tussock Tundra Alliance (proposed)

The plant association *Eriophorum vaginatum*/Ledum palustre ssp. decumbens–*Vaccinium vitis-idaea* occurs in Upland physiography most commonly on the following geomorphic units: Eolian Sand Sheet Upland; Alluvial-Marine Deposit; and Thaw Basin, ice-rich center. The average elevation in this plant association is 61 m ( $\pm 77$  m), and the slope gradient typically ranges between flat and nearly level. This plant association was associated most commonly with the surface form High-centered, Low-relief Polygons, but is also regularly associated with Non-patterned; Mixed High and Low-centered Polygons; and High-centered, High-relief Polygons. Soils are somewhat poorly drained to moderately well drained, surface organic thickness typically ranges from thin to moderately thick, coarse fragments are rare, but when they do occur the average top depth is 45 cm ( $\pm 64$  cm), dominant soil texture in the upper 40 cm is typically Loamy or Organic-rich, and permafrost was common with an average active layer thickness of 30 cm ( $\pm 8$  cm). Soil pH typically ranges from acidic to circumacidic, and the average electrical conductivity is 83  $\mu$ S/cm ( $\pm 60$   $\mu$ S/cm). The most common vegetation types include Tussock Tundra-Ericaceous and Tussock Tundra. *Eriophorum vaginatum* dominates the site, forming conspicuous tussocks with a cover of whole tussocks of at least 25%. Between the tussocks *Ledum palustre* ssp. decumbens and *Vaccinium vitis-idaea* codominate in the dwarf shrub layer. Other plant taxa that commonly occur in this plant association at low abundance include, the shrubs *Betula nana*, *Salix pulchra*, and *Cassiope tetragona*; the herbs *Arctagrostis latifolia*, *Carex bigelowii*, *Rubus chamaemorus*, and *Polygonum bistorta*; and the nonvasculars *Dactylina arctica*, *Flavocetraria cucullata*, *Aulacomnium turgidum*, *Thamnolia vermicularis*, and *Dicranum* sp.

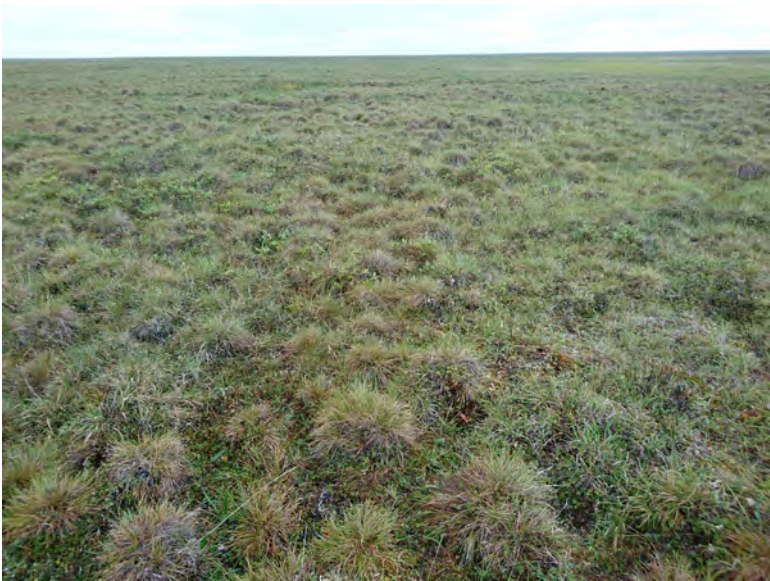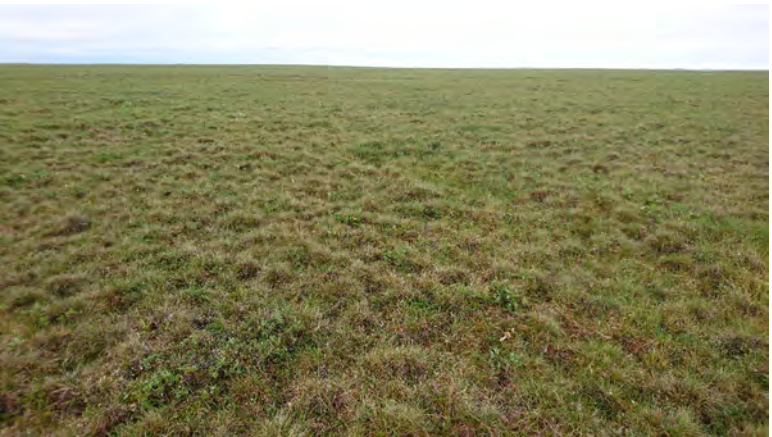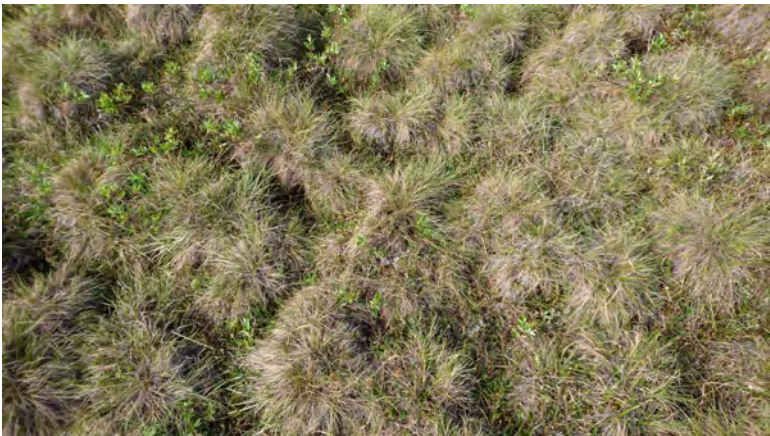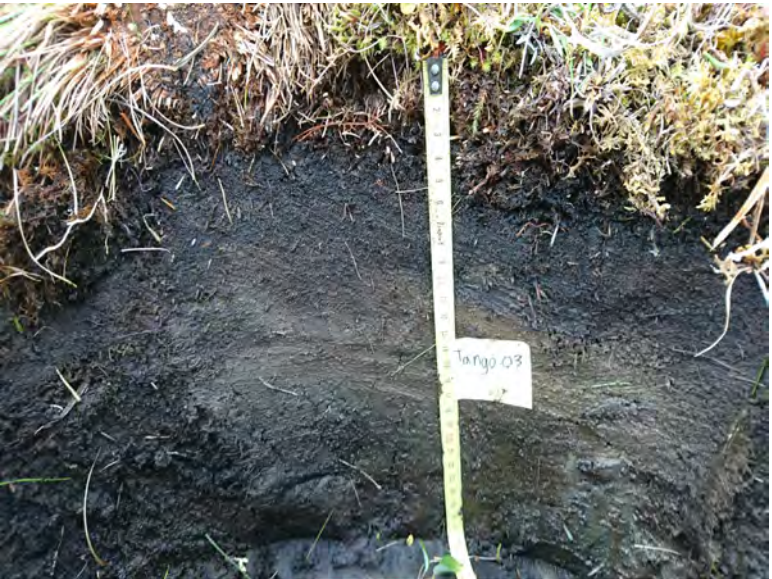

Representative photos (if available) for *Eriophorum vaginatum*/Ledum palustre ssp. decumbens–*Vaccinium vitis-idaea*. Top row: landscape photos, bottom row: ground photo (left), soil photo (right).

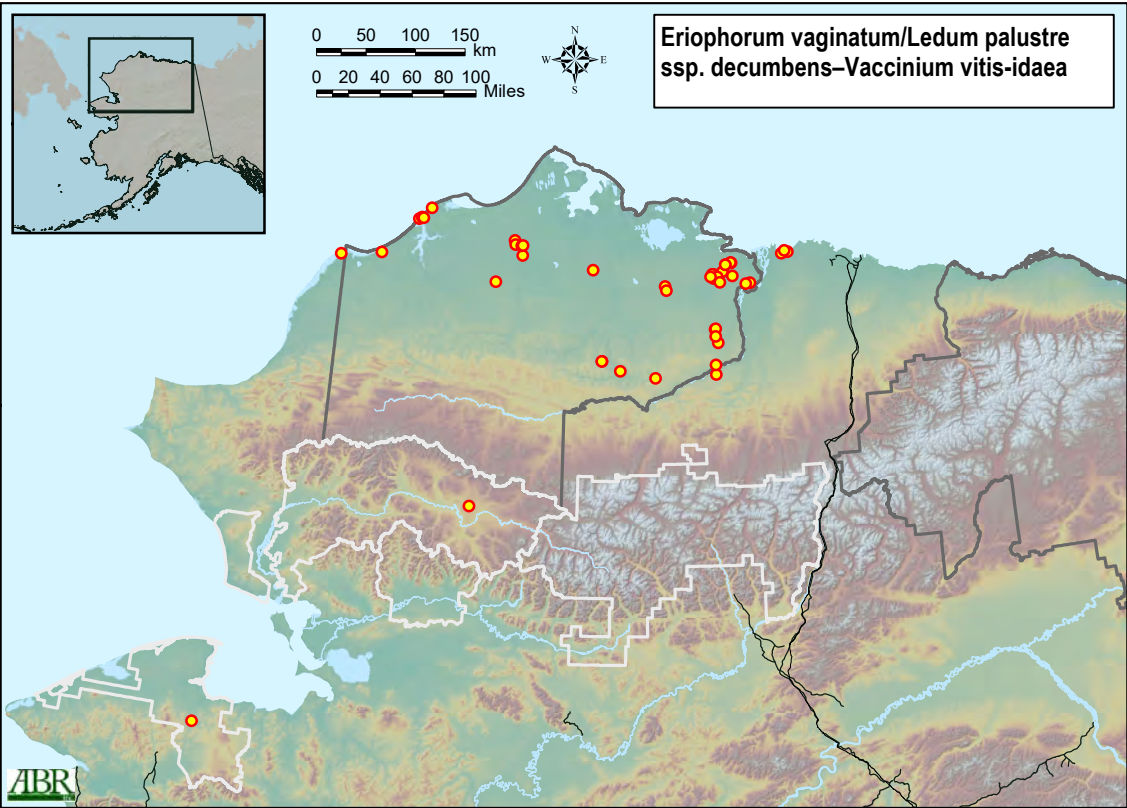

Distribution of *Eriophorum vaginatum*/Ledum palustre ssp. decumbens–*Vaccinium vitis-idaea* in the study area.



ERIVAG/LEDDEC–VACVIT: *Eriophorum vaginatum*/*Ledum palustre* ssp. *decumbens*–*Vaccinium vitis-idaea*, continued

|                                   | Avg. | Std Dev. | Percentile |      |      | n  |
|-----------------------------------|------|----------|------------|------|------|----|
|                                   |      |          | 10th       | 50th | 90th |    |
| Elevation (m)                     | 61   | 77       | 12         | 27   | 157  | 44 |
| Slope (degrees)                   | 1    | 1        | 0          | 0    | 3    | 45 |
| Surface Organic Thickness (cm)    | 13.2 | 7.8      | 5.4        | 11.0 | 25.6 | 45 |
| Cumul. Org. Thickness (cm)        | 16.9 | 8.1      | 8.0        | 15.0 | 28.6 | 43 |
| Depth to >15% Rock Fragments (cm) | 45   | 64       | 14         | 27   | 81   | 8  |
| Water Table Depth (cm)            | -25  | 9        | -36        | -24  | -17  | 18 |
| Active Layer Thickness (cm)       | 30   | 8        | 22         | 29   | 38   | 35 |
| Site pH                           | 5.3  | 0.8      | 4.2        | 5.3  | 6.3  | 44 |
| Electrical Conductivity (uS/cm)   | 83   | 60       | 30         | 70   | 150  | 44 |
| Whole Tussock Cover (%)           | 32   | 14       | 20         | 30   | 50   | 41 |

Environmental data summaries for *Eriophorum vaginatum*/*Ledum palustre* ssp. *decumbens*–*Vaccinium vitis-idaea*.

| Lifeform         | Code   | USDA Scientific Name                        | Const. | Avg. | Std Dev. | Percentile |      |      |
|------------------|--------|---------------------------------------------|--------|------|----------|------------|------|------|
|                  |        |                                             |        |      |          | 10th       | 50th | 90th |
| Deciduous Shrubs | BENA   | <i>Betula nana</i>                          | 56     | 4.4  | 2.2      | 2.0        | 5.0  | 7.6  |
| Deciduous Shrubs | SAPU15 | <i>Salix pulchra</i>                        | 80     | 3.5  | 2.4      | 1.0        | 3.0  | 6.0  |
| Evergreen Shrubs | CATE11 | <i>Cassiope tetragona</i>                   | 87     | 3.5  | 2.1      | 1.8        | 3.0  | 6.2  |
| Evergreen Shrubs | LEPAD  | <i>Ledum palustre</i> ssp. <i>decumbens</i> | 100    | 8.9  | 4.2      | 5.0        | 8.0  | 15.0 |
| Evergreen Shrubs | VAVI   | <i>Vaccinium vitis-idaea</i>                | 100    | 8.6  | 4.8      | 3.0        | 7.0  | 15.0 |
| Forbs            | RUCH   | <i>Rubus chamaemorus</i>                    | 44     | 5.0  | 3.9      | 1.0        | 3.5  | 10.0 |
| Sedges           | CABI5  | <i>Carex bigelowii</i>                      | 78     | 4.5  | 3.0      | 1.0        | 5.0  | 9.2  |
| Sedges           | ERVA4  | <i>Eriophorum vaginatum</i>                 | 100    | 16.3 | 9.2      | 8.0        | 15.0 | 21.8 |
| Mosses           | AUTU70 | <i>Aulacomnium turgidum</i>                 | 73     | 5.0  | 5.3      | 1.0        | 3.0  | 10.0 |
| Mosses           | DICRA8 | <i>Dicranum</i> sp.                         | 47     | 13.7 | 10.4     | 5.0        | 10.0 | 30.0 |
| Lichens          | DAAR60 | <i>Dactylina arctica</i>                    | 64     | 1.0  | 0.6      | 0.1        | 1.0  | 2.0  |
| Lichens          | FLCU   | <i>Flavocetraria cucullata</i>              | 96     | 1.8  | 1.4      | 1.0        | 1.0  | 3.0  |

Constancy and foliar cover data summaries for *Eriophorum vaginatum*/*Ledum palustre* ssp. *decumbens*–*Vaccinium vitis-idaea*. Constancy/cover summaries limited to taxa occurring in this plant association with a constancy  $\geq 60$  and average cover  $>0$ , or taxa with a constancy  $\geq 40$  and average cover  $\geq 3$ .

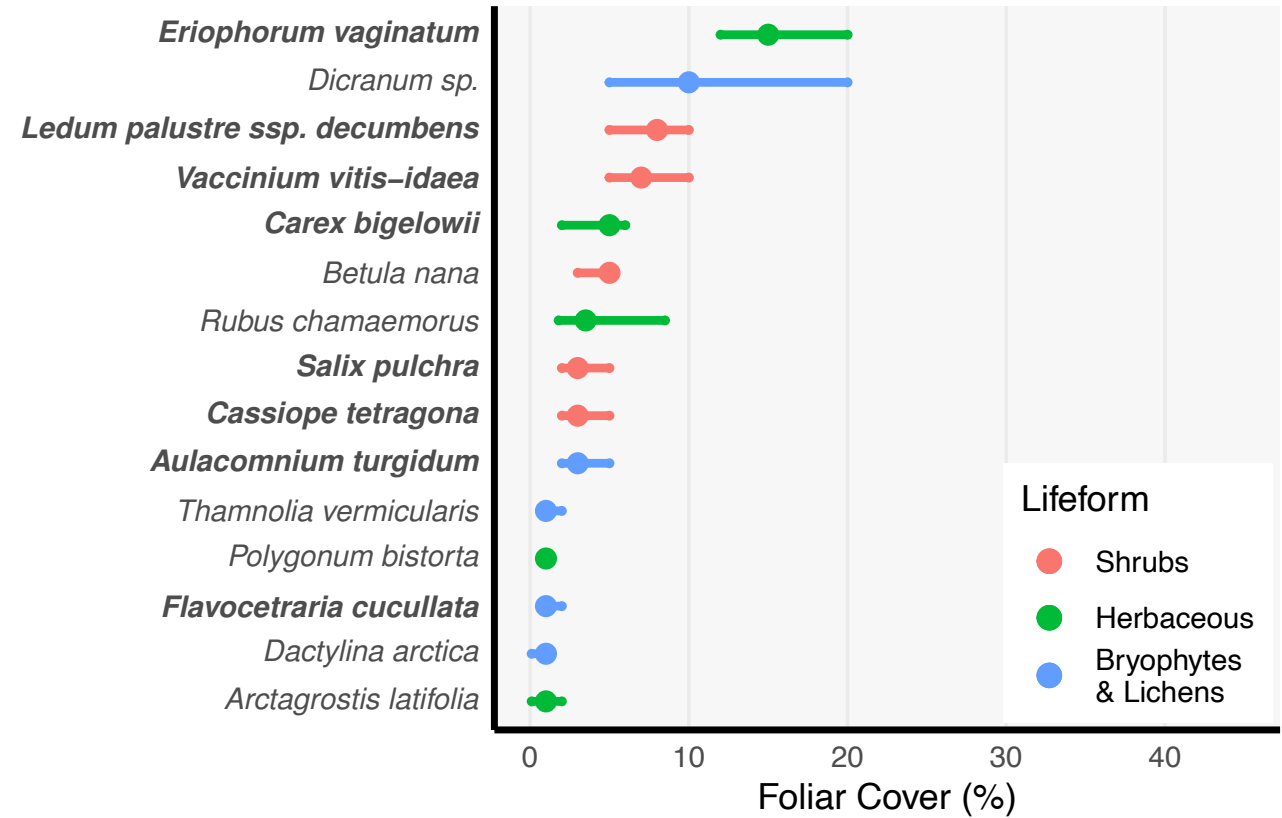

Median and 25th and 75th percentiles of foliar cover for the most common species in 3 lifeform groups in *Eriophorum vaginatum*/*Ledum palustre* ssp. *decumbens*–*Vaccinium vitis-idaea*. Latin names on y-axis in bold font occur in  $\geq 70\%$  of plots in this plant association.



**ERIVAG/VACULI/SPHAG: *Eriophorum vaginatum*/*Vaccinium uliginosum*/*Sphagnum* (n = 5)**

The plant association *Eriophorum vaginatum*/*Vaccinium uliginosum*/*Sphagnum* occurs in Upland physiography most commonly on the following geomorphic units: Bogs; Moraine, older; and Hillside Colluvium. The average elevation in this plant association is 340 m ( $\pm 382$  m), and the slope gradient typically ranges between flat and gently sloping. This plant association was associated most commonly with the surface form High-centered, Low-relief Polygons, but is also regularly associated with Hummocks and Nonpatterned. Soils are poorly drained to somewhat poorly drained, surface organic thickness is typically moderately thick, coarse fragments are rare, but when they do occur the average top depth is 19 cm ( $\pm 0$  cm), dominant soil texture in the upper 40 cm is typically Loamy or Peat, and permafrost was common with an average active layer thickness of 34 cm ( $\pm 9$  cm). Soil pH is typically acidic, and the average electrical conductivity is 96  $\mu$ S/cm ( $\pm 71$   $\mu$ S/cm). The most common vegetation types include Tussock Tundra and Open Mixed Low Shrub-Sedge Tussock Bog Meadow. *Eriophorum vaginatum* dominates the site, forming conspicuous tussocks with a cover of whole tussocks of at least 25%. *Vaccinium uliginosum* and *Sphagnum* occur between the tussocks at moderate to high cover. Other plant taxa that commonly occur in this plant association at low abundance include, the shrubs *Ledum palustre* ssp. *decumbens*, *Vaccinium vitis-idaea*, *Salix pulchra*, and *Betula nana*; the herbs *Carex aquatilis*, *Carex rotundata*, *Rubus chamaemorus*, and *Carex bigelowii*; and the nonvasculars *Cladina rangiferina*, *Sphagnum* sp., *Flavocetraria cucullata*, *Sphagnum fuscum*, and *Aulacomnium turgidum*.

A4346p: Arctic Acidic Tussock Tundra Alliance (proposed)

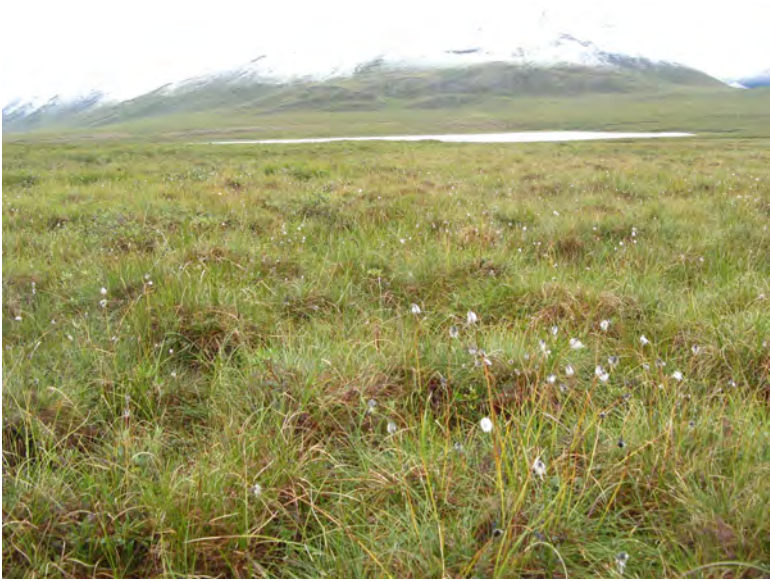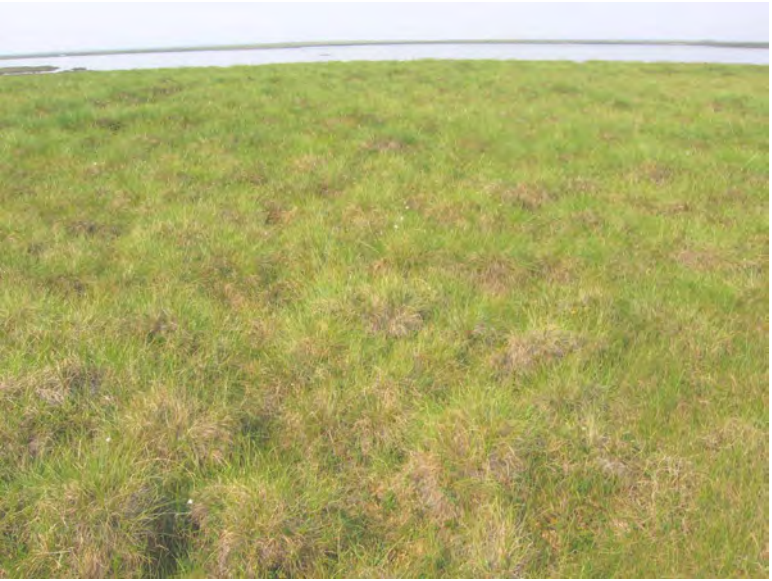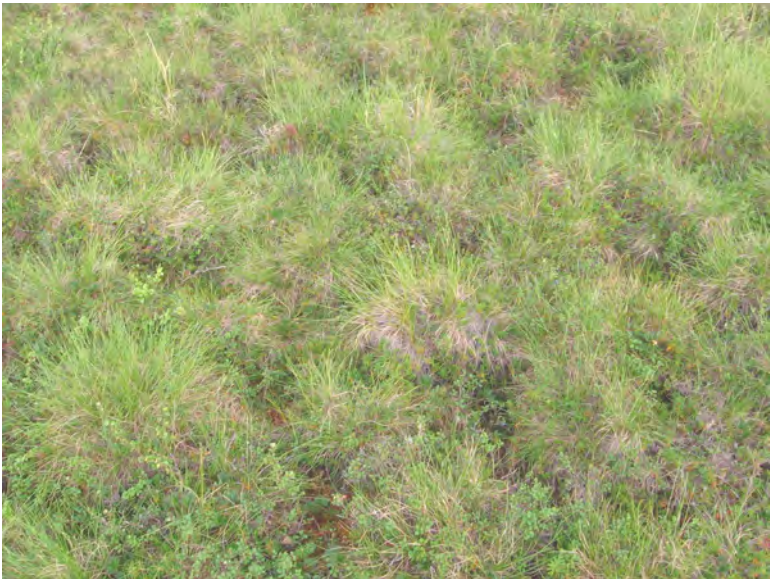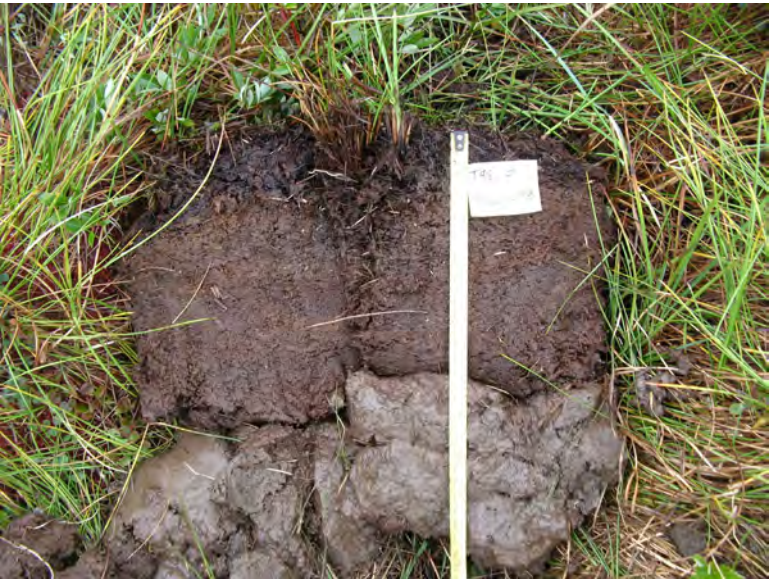

Representative photos (if available) for *Eriophorum vaginatum*/*Vaccinium uliginosum*/*Sphagnum*. Top row: landscape photos, bottom row: ground photo (left), soil photo (right).

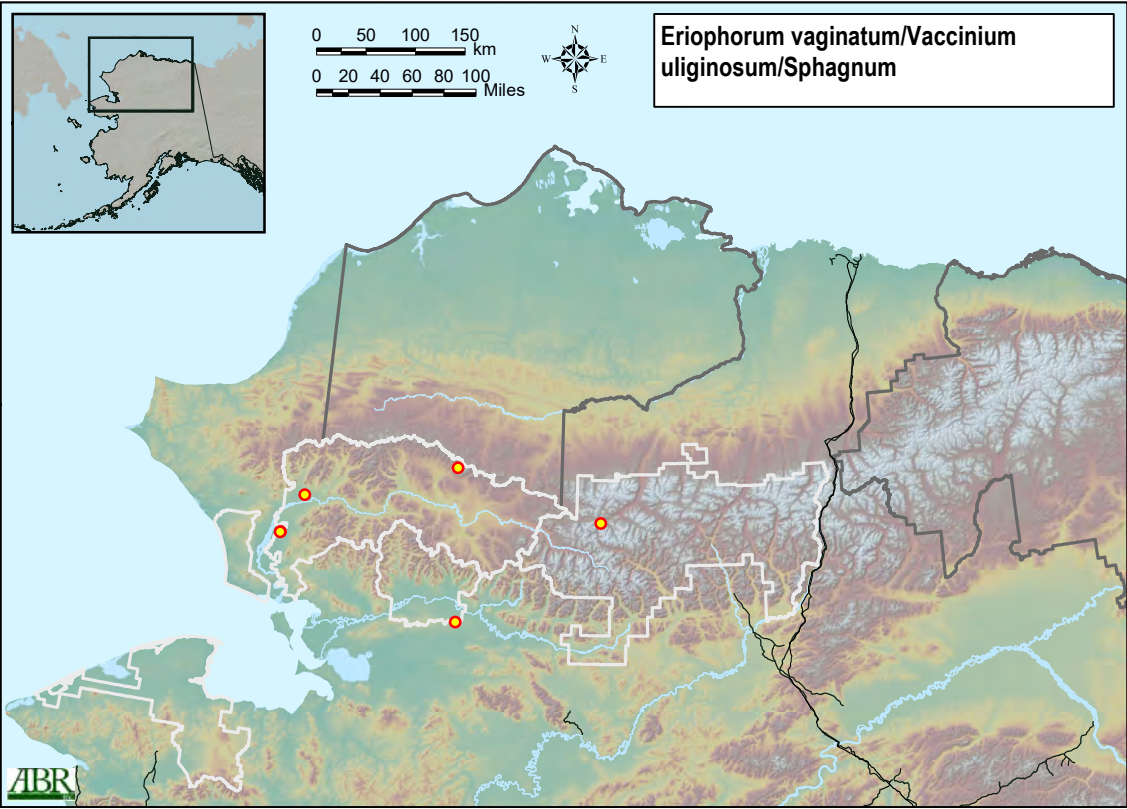

Distribution of *Eriophorum vaginatum*/*Vaccinium uliginosum*/*Sphagnum* in the study area.



ERIVAG/VACULI/SPHAG: *Eriophorum vaginatum*/*Vaccinium uliginosum*/*Sphagnum*, continued

|                                   | Avg. | Std Dev. | Percentile |      |      | n |
|-----------------------------------|------|----------|------------|------|------|---|
|                                   |      |          | 10th       | 50th | 90th |   |
| Elevation (m)                     | 340  | 382      | 53         | 109  | 771  | 5 |
| Slope (degrees)                   | 2    | 2        | 0          | 0    | 4    | 5 |
| Surface Organic Thickness (cm)    | 22.4 | 10.5     | 12.6       | 19.0 | 33.2 | 5 |
| Cumul. Org. Thickness (cm)        | 23.0 | 10.3     | 12.6       | 22.0 | 33.2 | 5 |
| Depth to >15% Rock Fragments (cm) | 19   |          | 19         | 19   | 19   | 1 |
| Water Table Depth (cm)            | -25  | 18       | -39        | -35  | -5   | 5 |
| Active Layer Thickness (cm)       | 34   | 9        | 25         | 38   | 39   | 5 |
| Site pH                           | 4.9  | 0.8      | 4.2        | 4.7  | 5.8  | 5 |
| Electrical Conductivity (uS/cm)   | 96   | 71       | 20         | 130  | 158  | 5 |
| Whole Tussock Cover (%)           | 43   | 31       | 17         | 30   | 77   | 5 |

Environmental data summaries for *Eriophorum vaginatum*/*Vaccinium uliginosum*/*Sphagnum*.

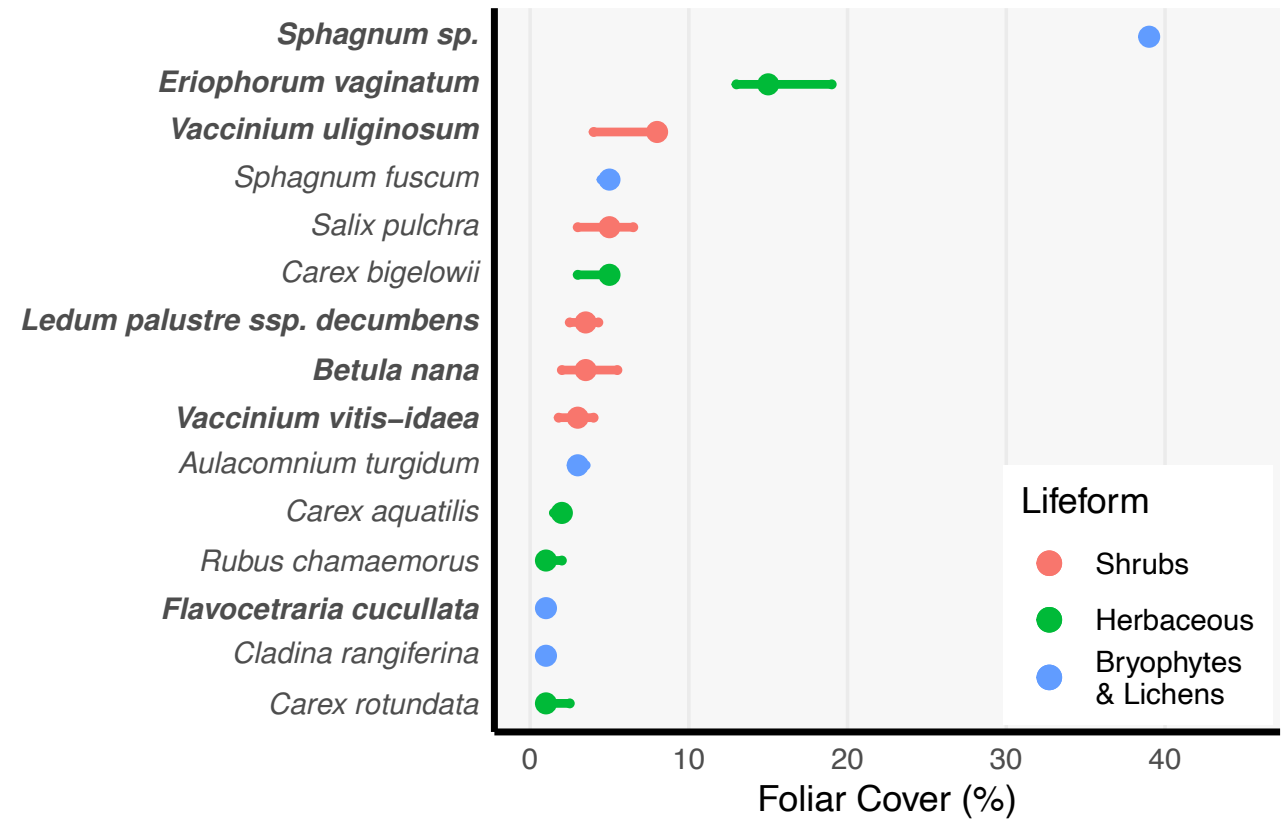

Median and 25th and 75th percentiles of foliar cover for the most common species in 3 lifeform groups in *Eriophorum vaginatum*/*Vaccinium uliginosum*/*Sphagnum*. Latin names on y-axis in bold font occur in ≥70% of plots in this plant association.

| Lifeform         | Code   | USDA Scientific Name                 | Const. | Avg. | Std Dev. | Percentile |      |      |
|------------------|--------|--------------------------------------|--------|------|----------|------------|------|------|
|                  |        |                                      |        |      |          | 10th       | 50th | 90th |
| Deciduous Shrubs | BENA   | <i>Betula nana</i>                   | 80     | 4.0  | 2.4      | 2.0        | 3.5  | 6.4  |
| Deciduous Shrubs | SAPU15 | <i>Salix pulchra</i>                 | 60     | 4.7  | 3.5      | 1.8        | 5.0  | 7.4  |
| Deciduous Shrubs | VAUL   | <i>Vaccinium uliginosum</i>          | 100    | 6.8  | 2.7      | 4.0        | 8.0  | 9.2  |
| Evergreen Shrubs | CATE11 | <i>Cassiope tetragona</i>            | 40     | 3.0  | 2.8      | 1.4        | 3.0  | 4.6  |
| Evergreen Shrubs | LEPAD  | <i>Ledum palustre ssp. decumbens</i> | 80     | 3.3  | 1.7      | 1.6        | 3.5  | 4.7  |
| Evergreen Shrubs | VAVI   | <i>Vaccinium vitis-idaea</i>         | 80     | 2.8  | 1.5      | 1.3        | 3.0  | 4.0  |
| Forbs            | RUCH   | <i>Rubus chamaemorus</i>             | 60     | 1.7  | 1.2      | 1.0        | 1.0  | 2.6  |
| Sedges           | CAAQ   | <i>Carex aquatilis</i>               | 60     | 1.7  | 0.6      | 1.2        | 2.0  | 2.0  |
| Sedges           | CABI5  | <i>Carex bigelowii</i>               | 60     | 3.7  | 2.3      | 1.8        | 5.0  | 5.0  |
| Sedges           | CARO7  | <i>Carex rotundata</i>               | 60     | 2.0  | 1.7      | 1.0        | 1.0  | 3.4  |
| Sedges           | ERAN6  | <i>Eriophorum angustifolium</i>      | 40     | 8.5  | 9.2      | 3.3        | 8.5  | 13.7 |
| Sedges           | ERVA4  | <i>Eriophorum vaginatum</i>          | 100    | 16.4 | 5.8      | 11.2       | 15.0 | 22.6 |
| Mosses           | AUTU70 | <i>Aulacomnium turgidum</i>          | 60     | 3.3  | 0.6      | 3.0        | 3.0  | 3.8  |
| Mosses           | SASA19 | <i>Sarmenthyphnum sarmentosum</i>    | 40     | 3.5  | 2.1      | 2.3        | 3.5  | 4.7  |
| Mosses           | SPFU70 | <i>Sphagnum fuscum</i>               | 60     | 4.7  | 0.6      | 4.2        | 5.0  | 5.0  |
| Mosses           | SPHAG2 | <i>Sphagnum sp.</i>                  | 80     | 40.8 | 33.0     | 11.5       | 39.0 | 71.4 |
| Lichens          | CLAR60 | <i>Cladina arbuscula</i>             | 60     | 0.1  | 0.5      | 0.1        | 0.1  | 1.0  |
| Lichens          | CLRA60 | <i>Cladina rangiferina</i>           | 60     | 1.0  | 0.0      | 1.0        | 1.0  | 1.0  |
| Lichens          | CLADI3 | <i>Cladina sp.</i>                   | 60     | 1.0  | 1.0      | 0.1        | 1.0  | 1.8  |
| Lichens          | FLCU   | <i>Flavocetraria cucullata</i>       | 80     | 1.3  | 0.5      | 1.0        | 1.0  | 1.7  |

Constancy and foliar cover data summaries for *Eriophorum vaginatum*/*Vaccinium uliginosum*/*Sphagnum*. Constancy/cover summaries limited to taxa occurring in this plant association with a constancy ≥60 and average cover >0, or taxa with a constancy ≥40 and average cover ≥3.



**LEDDEC/ERIVAG: *Ledum palustre* ssp. *decumbens*/Eriophorum vaginatum (n = 31)**

A4344p: Arctic Acidic Shrub Tussock Tundra Alliance (proposed)

The plant association *Ledum palustre* ssp. *decumbens*/Eriophorum vaginatum occurs in Upland physiography most commonly on the following geomorphic units: Frozen Upland Silt; Thaw Basin, ice-rich center; and Alluvial-Marine Deposit. The average elevation in this plant association is 102 m ( $\pm 107$  m), and the slope gradient typically ranges between flat and nearly level. This plant association was associated most commonly with the surface form High-centered, Low-relief Polygons, but is also regularly associated with Nonpatterned; Mixed High and Low-centered Polygons; and Mixed pits and polygons. Soils are poorly drained to somewhat poorly drained, surface organic thickness typically ranges from thin to moderately thick, coarse fragments are rare, but when they do occur the average top depth is 112 cm ( $\pm 97$  cm), dominant soil texture in the upper 40 cm is typically Organic-rich or Loamy, and permafrost was common with an average active layer thickness of 29 cm ( $\pm 6$  cm). Soil pH typically ranges from acidic to circumacidic, and the average electrical conductivity is 89  $\mu$ S/cm ( $\pm 51$   $\mu$ S/cm). The most common vegetation types include Open Mixed Low Shrub-Sedge Tussock Tundra and Tussock Tundra-Ericaceous. The vegetation is dominated by *Ledum palustre* ssp. *decumbens* which typically forms an open low shrub canopy, and *Eriophorum vaginatum* forms conspicuous tussocks with a cover of whole tussocks of at least 25%. Other plant taxa that commonly occur in this plant association at low abundance include, the shrubs *Vaccinium vitis-idaea*, *Betula nana*, *Salix pulchra*, and *Cassiope tetragona*; the herbs *Polygonum bistorta*, *Rubus chamaemorus*, *Arctagrostis latifolia*, and *Carex bigelowii*; and the nonvasculars *Dicranum elongatum*, *Flavocetraria cucullata*, *Dactylina arctica*, *Aulacomnium turgidum*, and *Hylocomium splendens*.

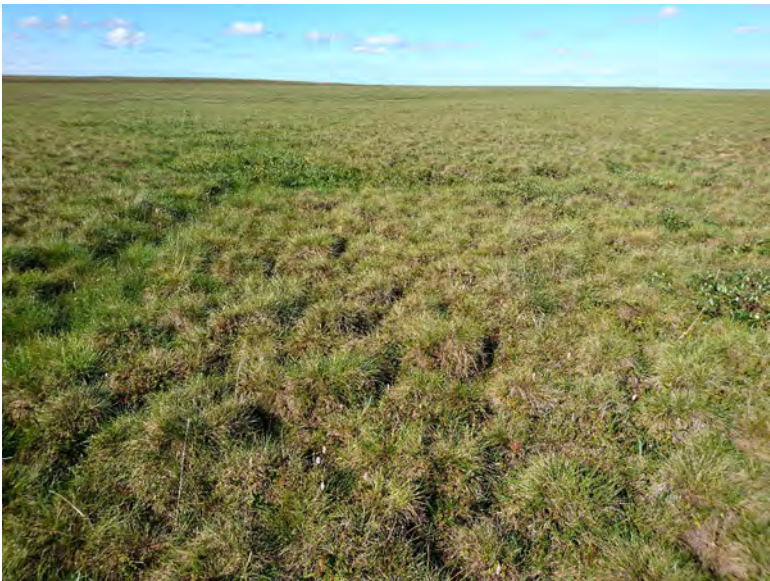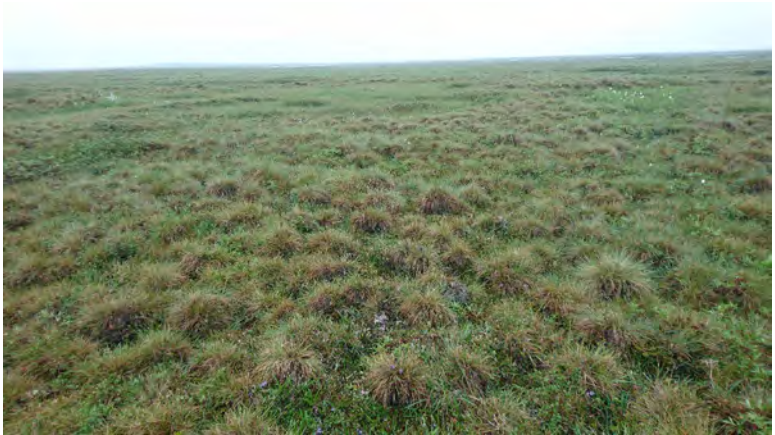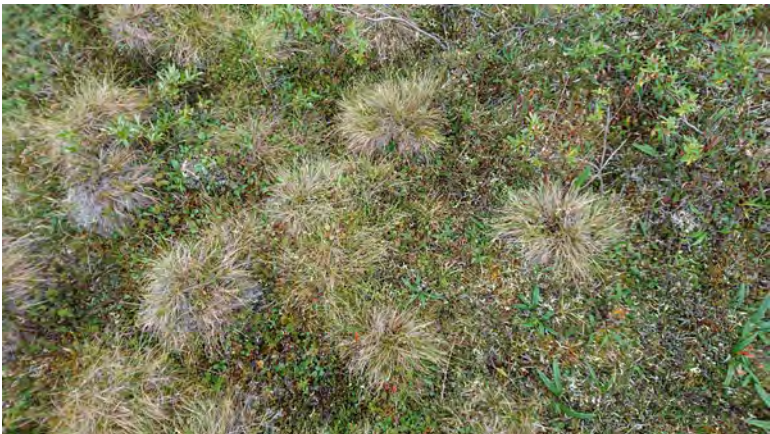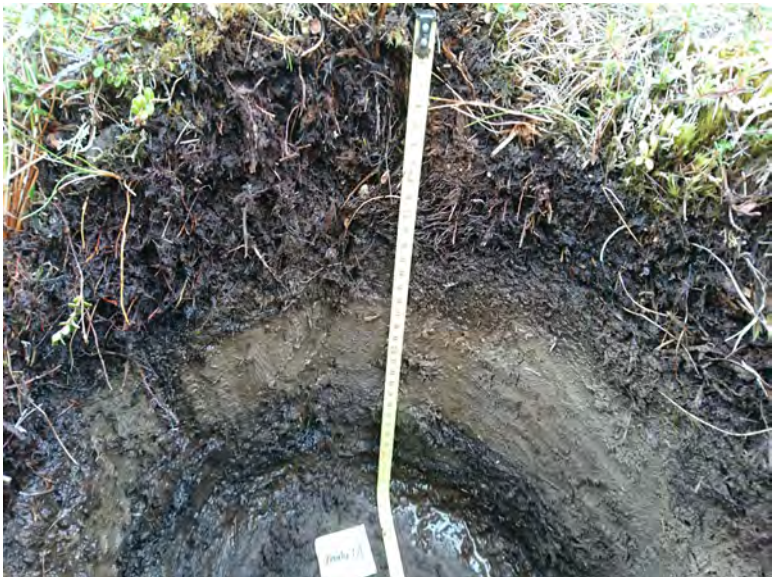

Representative photos (if available) for *Ledum palustre* ssp. *decumbens*/Eriophorum vaginatum. Top row: landscape photos, bottom row: ground photo (left), soil photo (right).

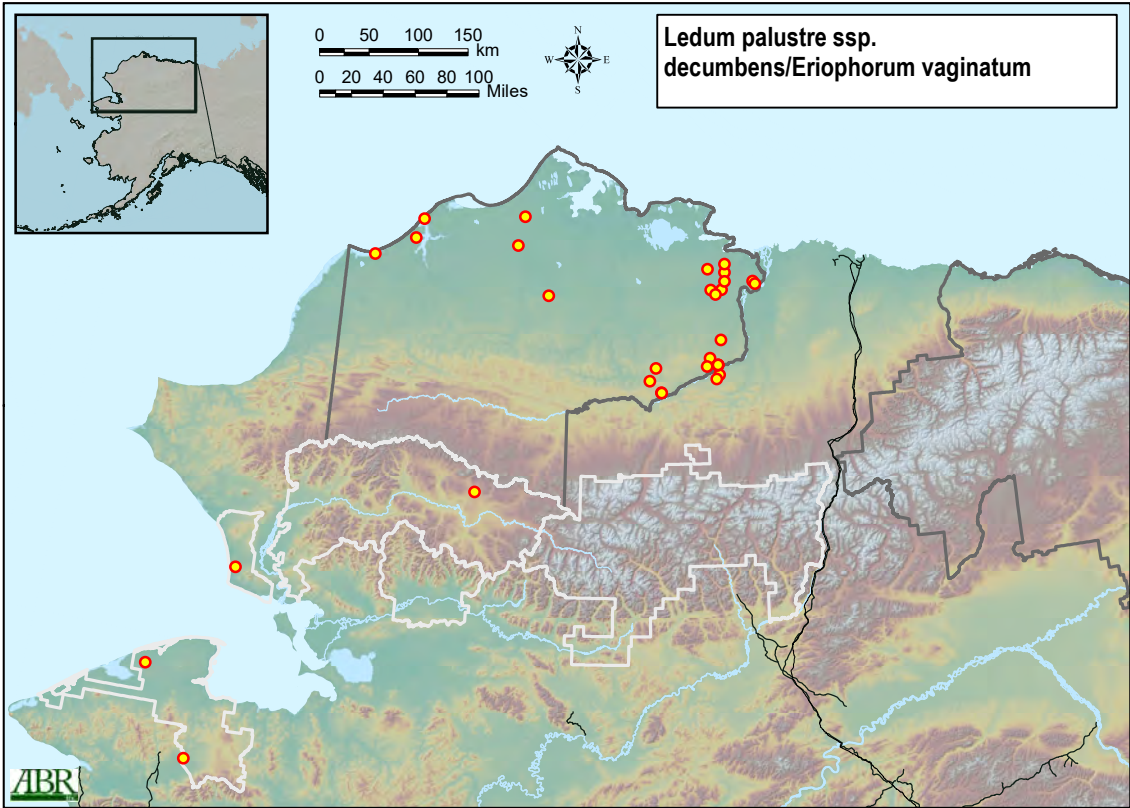

Distribution of *Ledum palustre* ssp. *decumbens*/Eriophorum vaginatum in the study area.



LEDDEC/ERIVAG: *Ledum palustre* ssp. *decumbens*/*Eriophorum vaginatum*, continued

|                                   | Avg. | Std Dev. | Percentile |      |      | n  |
|-----------------------------------|------|----------|------------|------|------|----|
|                                   |      |          | 10th       | 50th | 90th |    |
| Elevation (m)                     | 102  | 107      | 13         | 39   | 231  | 30 |
| Slope (degrees)                   | 2    | 3        | 0          | 0    | 4    | 31 |
| Surface Organic Thickness (cm)    | 16.5 | 9.1      | 5.0        | 17.0 | 27.0 | 31 |
| Cumul. Org. Thickness (cm)        | 19.8 | 7.6      | 11.8       | 19.0 | 27.1 | 30 |
| Depth to >15% Rock Fragments (cm) | 112  | 97       | 19         | 118  | 200  | 6  |
| Water Table Depth (cm)            | -23  | 12       | -35        | -27  | -12  | 11 |
| Active Layer Thickness (cm)       | 29   | 6        | 24         | 27   | 37   | 28 |
| Site pH                           | 5.1  | 1.0      | 4.0        | 5.0  | 6.2  | 31 |
| Electrical Conductivity (uS/cm)   | 89   | 51       | 40         | 80   | 140  | 31 |
| Whole Tussock Cover (%)           | 34   | 16       | 18         | 30   | 56   | 30 |

Environmental data summaries for *Ledum palustre* ssp. *decumbens*/*Eriophorum vaginatum*.

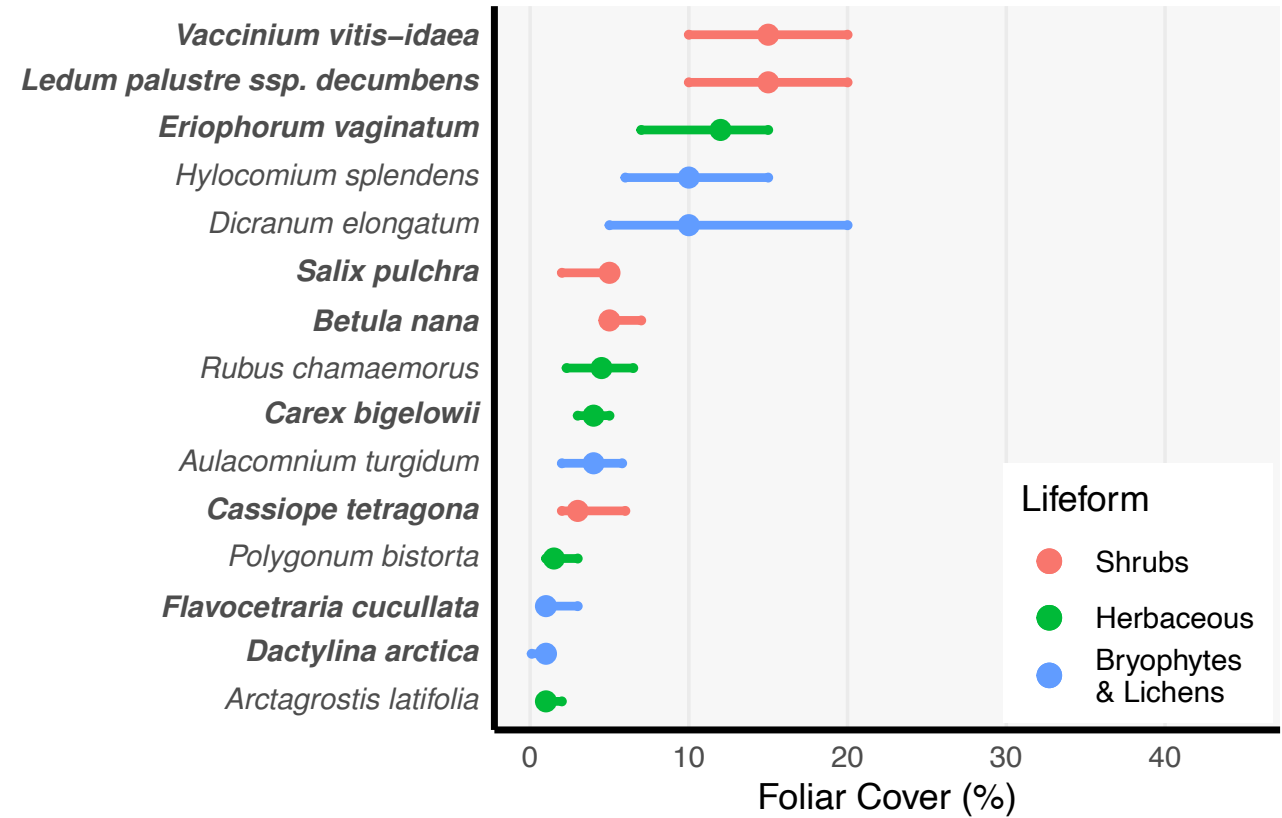

Median and 25th and 75th percentiles of foliar cover for the most common species in 3 lifeform groups in *Ledum palustre* ssp. *decumbens*/*Eriophorum vaginatum*. Latin names on y-axis in bold font occur in ≥70% of plots in this plant association.

| Lifeform         | Code   | USDA Scientific Name                        | Const. | Avg. | Std Dev. | Percentile |      |      |
|------------------|--------|---------------------------------------------|--------|------|----------|------------|------|------|
|                  |        |                                             |        |      |          | 10th       | 50th | 90th |
| Deciduous Shrubs | BENA   | <i>Betula nana</i>                          | 81     | 5.2  | 2.0      | 2.4        | 5.0  | 7.0  |
| Deciduous Shrubs | SAPU15 | <i>Salix pulchra</i>                        | 81     | 3.6  | 2.3      | 1.0        | 5.0  | 7.0  |
| Evergreen Shrubs | CATE11 | <i>Cassiope tetragona</i>                   | 74     | 4.6  | 3.0      | 2.0        | 3.0  | 9.8  |
| Evergreen Shrubs | EMNI   | <i>Empetrum nigrum</i>                      | 61     | 5.9  | 6.1      | 1.0        | 3.0  | 11.0 |
| Evergreen Shrubs | LEPAD  | <i>Ledum palustre</i> ssp. <i>decumbens</i> | 100    | 15.7 | 8.9      | 8.0        | 15.0 | 30.0 |
| Evergreen Shrubs | VAVI   | <i>Vaccinium vitis-idaea</i>                | 100    | 16.2 | 8.3      | 8.0        | 15.0 | 30.0 |
| Forbs            | RUCH   | <i>Rubus chamaemorus</i>                    | 45     | 6.1  | 6.6      | 1.3        | 4.5  | 12.9 |
| Sedges           | CABI5  | <i>Carex bigelowii</i>                      | 71     | 4.4  | 2.4      | 2.0        | 4.0  | 7.0  |
| Sedges           | ERVA4  | <i>Eriophorum vaginatum</i>                 | 100    | 11.9 | 5.8      | 5.0        | 12.0 | 20.0 |
| Mosses           | AUTU70 | <i>Aulacomnium turgidum</i>                 | 65     | 4.5  | 3.4      | 1.0        | 4.0  | 10.0 |
| Mosses           | DIEL70 | <i>Dicranum elongatum</i>                   | 55     | 13.9 | 11.6     | 4.0        | 10.0 | 31.6 |
| Mosses           | HYSP70 | <i>Hylocomium splendens</i>                 | 48     | 12.2 | 11.7     | 2.4        | 10.0 | 18.0 |
| Lichens          | DAAR60 | <i>Dactylina arctica</i>                    | 77     | 1.0  | 0.6      | 0.1        | 1.0  | 2.0  |
| Lichens          | FLCU   | <i>Flavocetraria cucullata</i>              | 97     | 2.6  | 2.4      | 1.0        | 1.0  | 5.2  |

Constancy and foliar cover data summaries for *Ledum palustre* ssp. *decumbens*/*Eriophorum vaginatum*. Constancy/cover summaries limited to taxa occurring in this plant association with a constancy ≥60 and average cover >0, or taxa with a constancy ≥40 and average cover ≥3.



**SALALA/ASTSIB: *Salix alaxensis*/*Eurybia sibirica* (n = 8)**

The plant association *Salix alaxensis*/*Eurybia sibirica* occurs in Riverine physiography most commonly on the following geomorphic units: Braided Active Overbank Deposit; Meander Active Overbank Deposit; and Meander Coarse Active Channel Deposit. The average elevation in this plant association is 91 m (±120 m), and the slope gradient is typically flat. This plant association was associated most commonly with the surface form Nonpatterned, but is also regularly associated with Scour channels-ridges and Tree mounds (downed logs and root balls). Soils are well drained to somewhat excessively drained, surface organic thickness typically ranges from absent to very thin, coarse fragments are common with an average top depth of 61 cm (±54 cm), dominant soil texture in the upper 40 cm is typically Sandy or Gravelly, and permafrost was rarely encountered, with an average active layer thickness of 128 cm (±0 cm). Soil pH typically ranges from circumacidic to alkaline, and the average electrical conductivity is 91 µS/cm (±68 µS/cm). The most common vegetation types include Open Tall Willow and Closed Low Willow. The vegetation is dominated by *Salix alaxensis*, and *Eurybia sibirica* is always present in the understory at moderate to high cover. Other plant taxa that commonly occur in this plant association at low abundance include, the shrubs *Dasiphora fruticosa*, *Salix arbusculoides*, *Salix glauca*, and *Salix hastata*; the herbs *Arctagrostis latifolia*, *Festuca rubra*, *Astragalus alpinus*, and *Equisetum arvense*; and the nonvasculars *Campylium polygamum*, *Brachythecium* sp., *Sanionia uncinata*, *Racomitrium lanuginosum*, and *Hylocomium splendens*.

A4363p: *Salix alaxensis* River Bar Alliance (proposed)

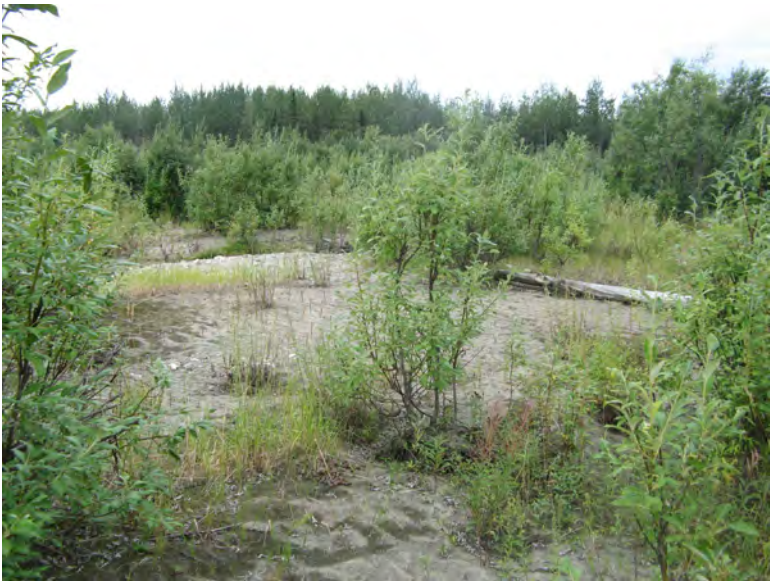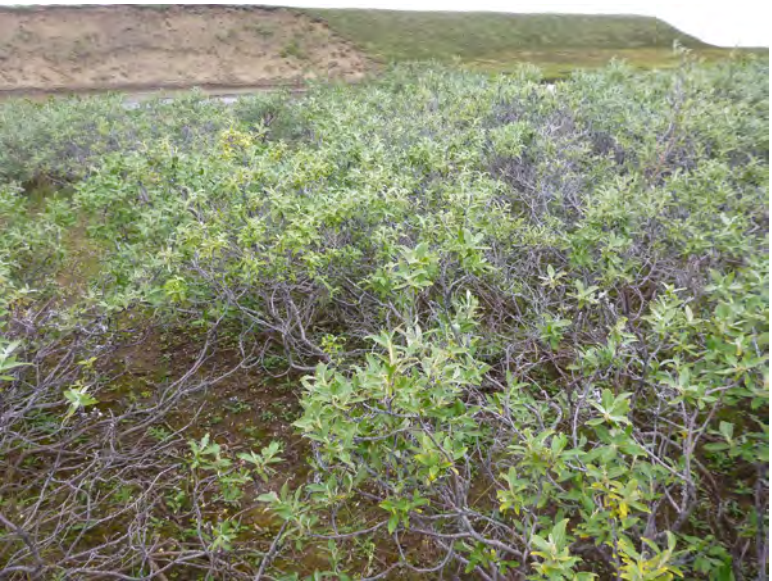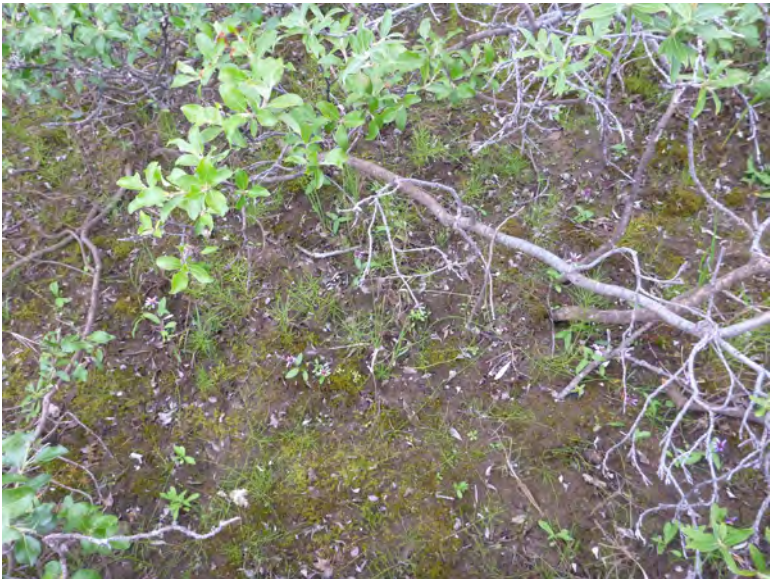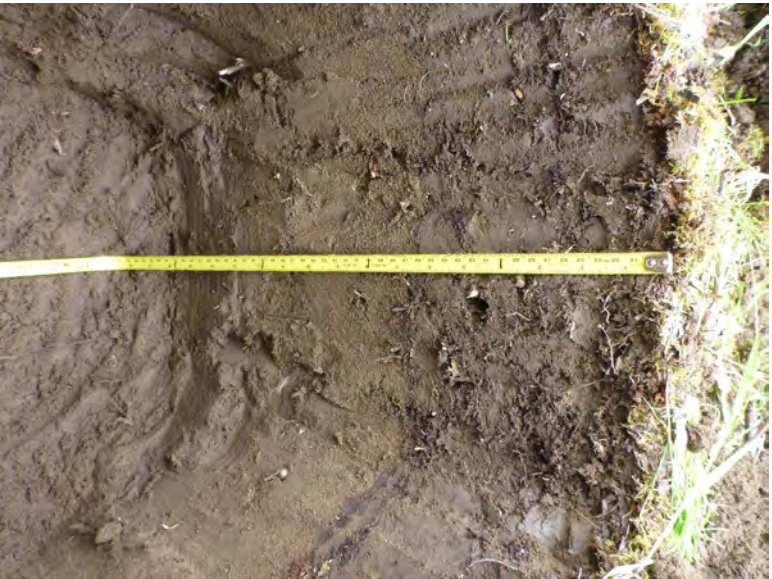

Representative photos (if available) for *Salix alaxensis*/*Eurybia sibirica*. Top row: landscape photos, bottom row: ground photo (left), soil photo (right).

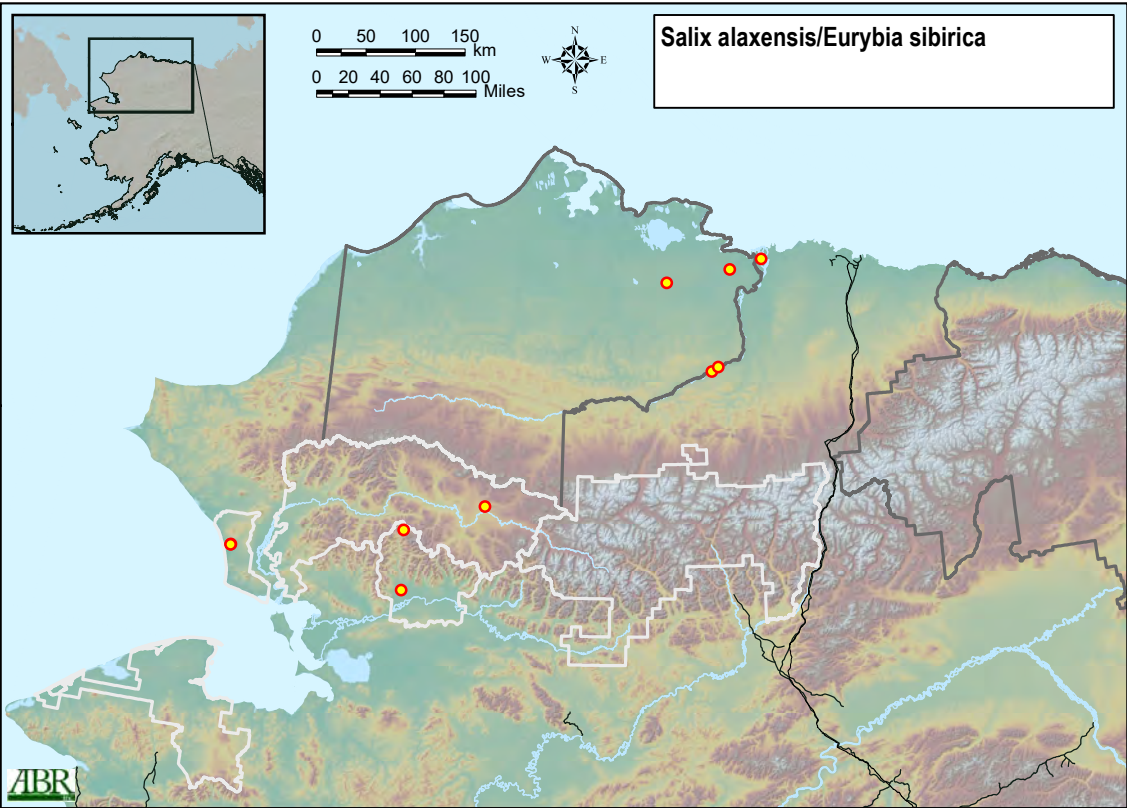

Distribution of *Salix alaxensis*/*Eurybia sibirica* in the study area.



SALALA/ASTSIB: *Salix alaxensis*/*Eurybia sibirica*, continued

|                                   | Avg. | Std Dev. | Percentile |      |      | n |
|-----------------------------------|------|----------|------------|------|------|---|
|                                   |      |          | 10th       | 50th | 90th |   |
| Elevation (m)                     | 91   | 120      | 24         | 37   | 193  | 7 |
| Slope (degrees)                   | 0    | 0        | 0          | 0    | 0    | 7 |
| Surface Organic Thickness (cm)    | 0.8  | 1.2      | 0.0        | 0.0  | 2.3  | 8 |
| Cumul. Org. Thickness (cm)        | 2.0  | 2.3      | 0.0        | 2.0  | 4.8  | 7 |
| Depth to >15% Rock Fragments (cm) | 61   | 54       | 3          | 60   | 119  | 6 |
| Water Table Depth (cm)            |      |          |            |      |      | 8 |
| Active Layer Thickness (cm)       | 128  |          | 128        | 128  | 128  | 1 |
| Site pH                           | 7.4  | 0.8      | 6.2        | 7.5  | 8.1  | 8 |
| Electrical Conductivity (uS/cm)   | 91   | 68       | 16         | 80   | 174  | 7 |
| Whole Tussock Cover (%)           | 0    | 0        | 0          | 0    | 0    | 7 |

Environmental data summaries for *Salix alaxensis*/*Eurybia sibirica*.

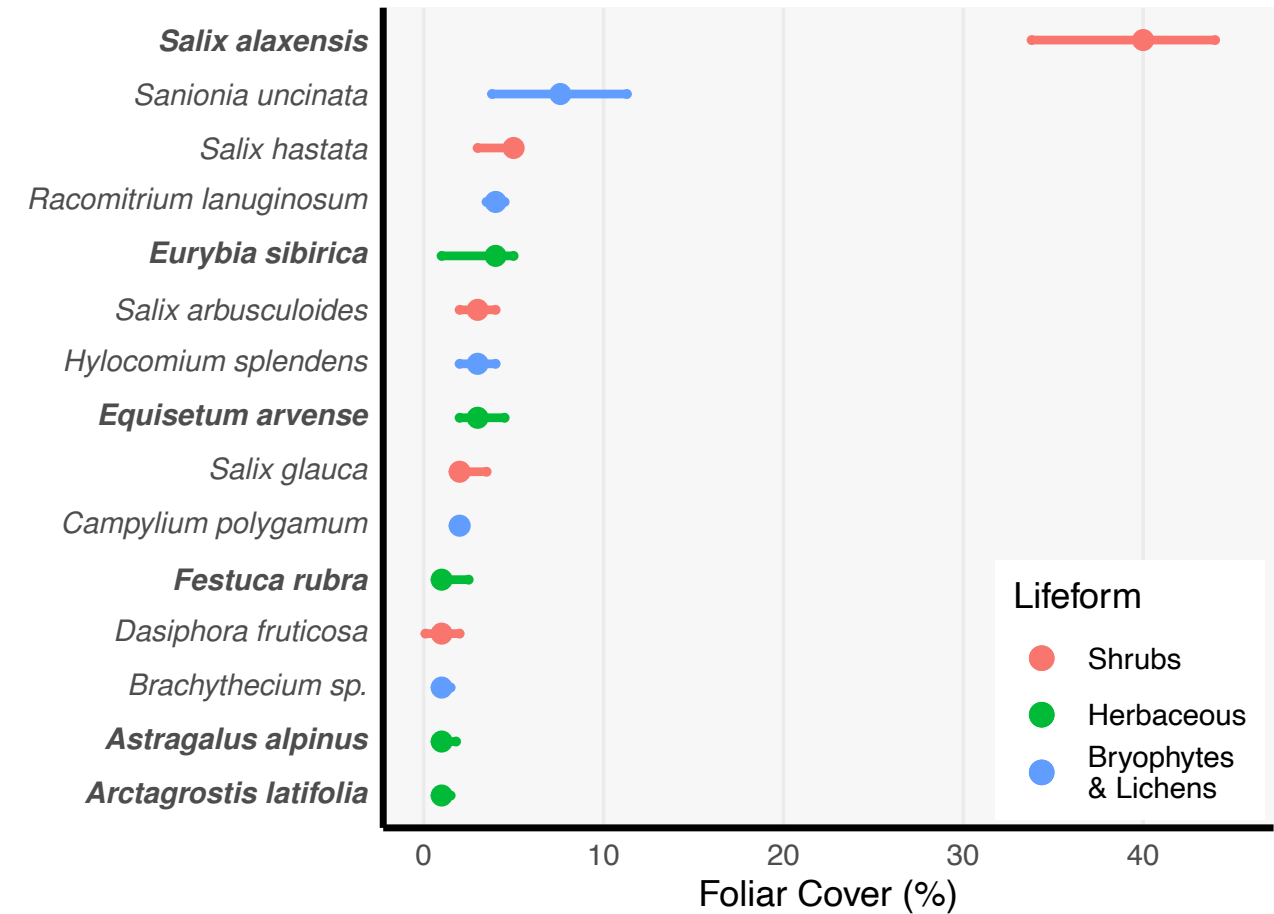

Median and 25th and 75th percentiles of foliar cover for the most common species in 3 lifeform groups in *Salix alaxensis*/*Eurybia sibirica*. Latin names on y-axis in bold font occur in ≥70% of plots in this plant association.

| Lifeform         | Code   | USDA Scientific Name          | Const. | Avg. | Std Dev. | Percentile |      |      |
|------------------|--------|-------------------------------|--------|------|----------|------------|------|------|
|                  |        |                               |        |      |          | 10th       | 50th | 90th |
| Deciduous Shrubs | SAAL   | <i>Salix alaxensis</i>        | 100    | 41.5 | 13.8     | 28.5       | 40.0 | 56.0 |
| Deciduous Shrubs | SAHA   | <i>Salix hastata</i>          | 63     | 5.8  | 5.4      | 1.8        | 5.0  | 11.0 |
| Forbs            | ARTI   | <i>Artemisia tilesii</i>      | 63     | 1.0  | 0.8      | 0.1        | 1.0  | 1.6  |
| Forbs            | ASAL7  | <i>Astragalus alpinus</i>     | 75     | 1.9  | 2.1      | 1.0        | 1.0  | 4.0  |
| Forbs            | CACA20 | <i>Castilleja caudata</i>     | 63     | 1.6  | 2.0      | 0.1        | 1.0  | 3.8  |
| Forbs            | EUSI13 | <i>Eurybia sibirica</i>       | 100    | 3.6  | 2.6      | 1.0        | 4.0  | 5.9  |
| Forbs            | PAPA8  | <i>Parnassia palustris</i>    | 63     | 1.0  | 1.3      | 0.1        | 0.1  | 2.2  |
| Forbs            | POVI3  | <i>Polygonum viviparum</i>    | 63     | 1.0  | 0.4      | 0.1        | 1.0  | 1.0  |
| Ferns & Allies   | EQAR   | <i>Equisetum arvense</i>      | 88     | 3.3  | 1.9      | 1.0        | 3.0  | 5.4  |
| Grasses          | ARLA2  | <i>Arctagrostis latifolia</i> | 88     | 1.5  | 1.2      | 1.0        | 1.0  | 2.8  |
| Grasses          | FERU2  | <i>Festuca rubra</i>          | 88     | 1.7  | 1.4      | 0.1        | 1.0  | 3.4  |
| Grasses          | TRSP2  | <i>Trisetum spicatum</i>      | 63     | 0.1  | 0.4      | 0.1        | 0.1  | 1.0  |

Constancy and foliar cover data summaries for *Salix alaxensis*/*Eurybia sibirica*. Constancy/cover summaries limited to taxa occurring in this plant association with a constancy ≥60 and average cover >0, or taxa with a constancy ≥40 and average cover ≥3.



**SALALA/CHRBIP: *Salix alaxensis*/Tanacetum bipinnatum ssp. bipinnatum (n = 13)**

A4365p: *Salix alaxensis* - *Salix niphoclada* River Bar & Dune Alliance (proposed)

The plant association *Salix alaxensis*/Tanacetum bipinnatum ssp. bipinnatum occurs in Riverine and Upland physiography most commonly on the following geomorphic units: Eolian Active Sand Dune; Eolian Active Sand Deposit; and Delta Inactive Channel Deposit. The average elevation in this plant association is 14 m ( $\pm 8$  m), and the slope gradient typically ranges between flat and moderately steep. This plant association was associated most commonly with the surface form Small dunes, but is also regularly associated with Nonpatterned and Wind deflation. Soils are well drained to somewhat excessively drained, surface organics are typically absent, coarse fragments are uncommon, but when they do occur the average top depth is 115 cm ( $\pm 30$  cm), dominant soil texture in the upper 40 cm is typically Sandy or Loamy, and permafrost was never encountered in the upper 130 cm of the soil profile. Soil pH typically ranges from circumalkaline to alkaline, and the average electrical conductivity is 105  $\mu$ S/cm ( $\pm 189 \mu$ S/cm). The most common vegetation types include Open Low Willow, Open Tall Willow, and Partially Vegetated. The vegetation is dominated by *Salix alaxensis*, and *Tanacetum bipinnatum* ssp. bipinnatum is always present in the understory at low to moderate cover. Other plant taxa that commonly occur in this plant association at low abundance include, the shrubs *Salix niphoclada*, *Salix glauca*, *Dryas integrifolia*, and *Arctostaphylos rubra*; the herbs *Stellaria longipes*, *Festuca rubra*, *Equisetum arvense*, and *Bromus pumpellianus*; and the nonvasculars *Bryum* sp., *Collema ceraniscum*, *Bryum pseudotriquetrum*, *Distichium capillaceum*, and *Ceratodon purpureus*.

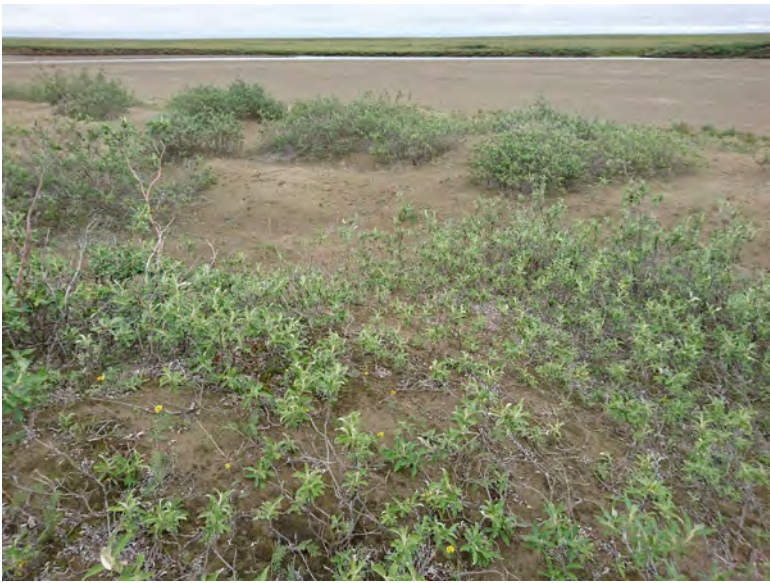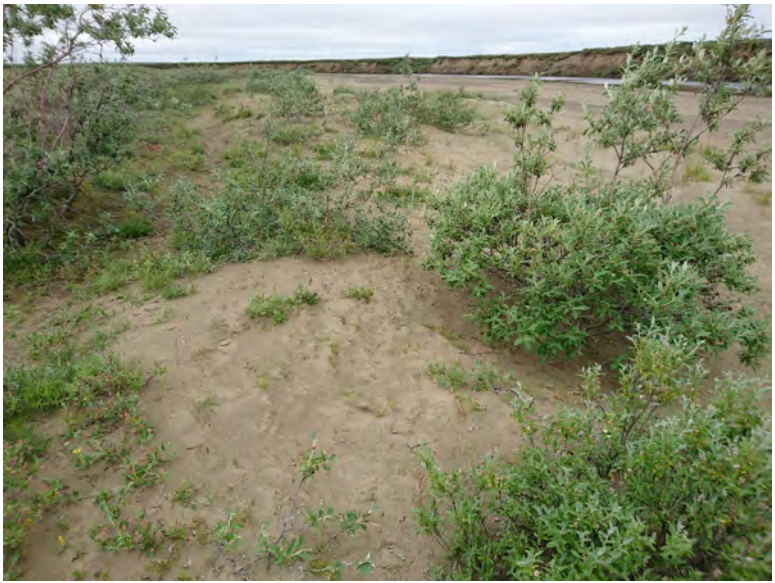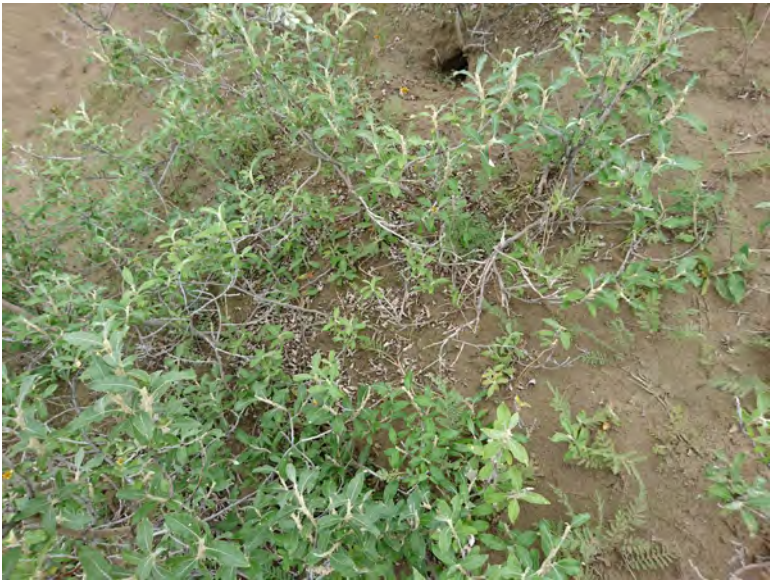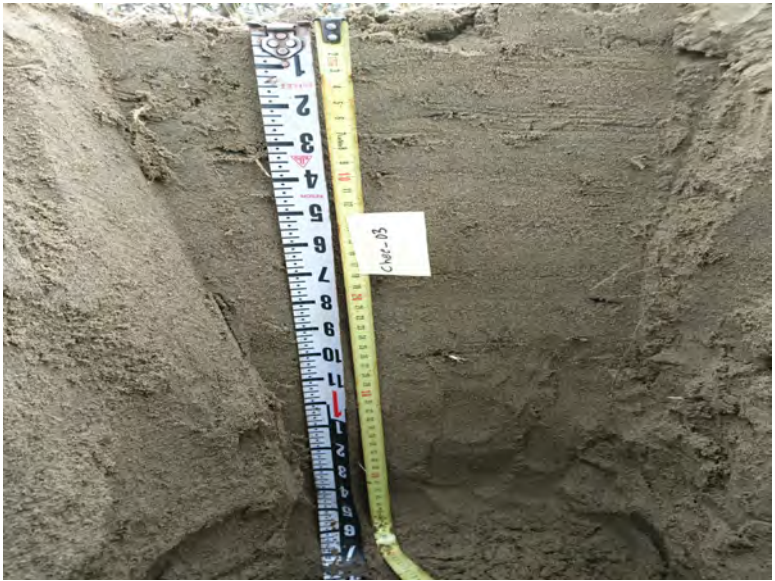

Representative photos (if available) for *Salix alaxensis*/Tanacetum bipinnatum ssp. bipinnatum. Top row: landscape photos, bottom row: ground photo (left), soil photo (right).

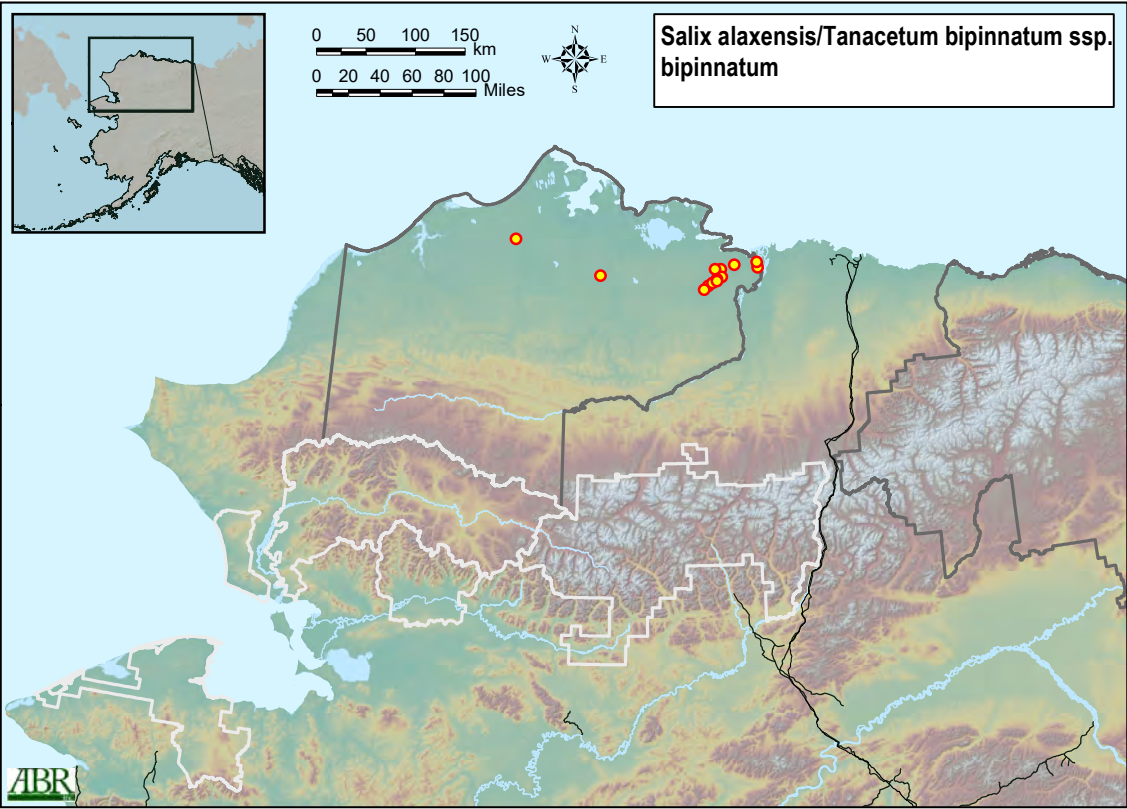

Distribution of *Salix alaxensis*/Tanacetum bipinnatum ssp. bipinnatum in the study area.



SALALA/CHRBIP: *Salix alaxensis*/*Tanacetum bipinnatum* ssp. *bipinnatum*, continued

|                                   | Avg. | Std Dev. | Percentile |      |      | n  |
|-----------------------------------|------|----------|------------|------|------|----|
|                                   |      |          | 10th       | 50th | 90th |    |
| Elevation (m)                     | 14   | 8        | 5          | 14   | 19   | 13 |
| Slope (degrees)                   | 8    | 11       | 0          | 2    | 20   | 12 |
| Surface Organic Thickness (cm)    | 0.1  | 0.3      | 0.0        | 0.0  | 0.0  | 13 |
| Cumul. Org. Thickness (cm)        | 0.5  | 0.9      | 0.0        | 0.0  | 1.0  | 13 |
| Depth to >15% Rock Fragments (cm) | 115  | 30       | 86         | 127  | 134  | 4  |
| Water Table Depth (cm)            |      |          |            |      |      | 13 |
| Soil Thaw Depth (cm)              |      |          |            |      |      | 13 |
| Site pH                           | 7.9  | 0.6      | 6.8        | 8.2  | 8.3  | 13 |
| Electrical Conductivity (uS/cm)   | 105  | 189      | 40         | 50   | 88   | 13 |
| Whole Tussock Cover (%)           | 0    | 0        | 0          | 0    | 0    | 8  |

Environmental data summaries for *Salix alaxensis*/*Tanacetum bipinnatum* ssp. *bipinnatum*.

| Lifeform         | Code  | USDA Scientific Name                               | Const. | Avg. | Std Dev. | Percentile |      |      |
|------------------|-------|----------------------------------------------------|--------|------|----------|------------|------|------|
|                  |       |                                                    |        |      |          | 10th       | 50th | 90th |
| Deciduous Shrubs | SAAL  | <i>Salix alaxensis</i>                             | 100    | 17.2 | 8.4      | 8.4        | 18.0 | 25.0 |
| Deciduous Shrubs | SAGL  | <i>Salix glauca</i>                                | 46     | 4.1  | 3.1      | 1.0        | 4.0  | 7.4  |
| Forbs            | STLO2 | <i>Stellaria longipes</i>                          | 69     | 0.1  | 0.5      | 0.1        | 0.1  | 1.1  |
| Forbs            | TABIB | <i>Tanacetum bipinnatum</i> ssp. <i>bipinnatum</i> | 100    | 2.7  | 2.3      | 0.1        | 2.0  | 5.0  |
| Ferns & Allies   | EQAR  | <i>Equisetum arvense</i>                           | 85     | 1.7  | 1.9      | 0.1        | 1.0  | 5.0  |
| Grasses          | BRPU3 | <i>Bromus pumpellianus</i>                         | 69     | 1.1  | 0.9      | 0.1        | 1.0  | 2.2  |
| Grasses          | FERU2 | <i>Festuca rubra</i>                               | 100    | 2.2  | 2.1      | 0.1        | 2.0  | 5.0  |

Constancy and foliar cover data summaries for *Salix alaxensis*/*Tanacetum bipinnatum* ssp. *bipinnatum*. Constancy/cover summaries limited to taxa occurring in this plant association with a constancy  $\geq 60$  and average cover  $> 0$ , or taxa with a constancy  $\geq 40$  and average cover  $\geq 3$ .

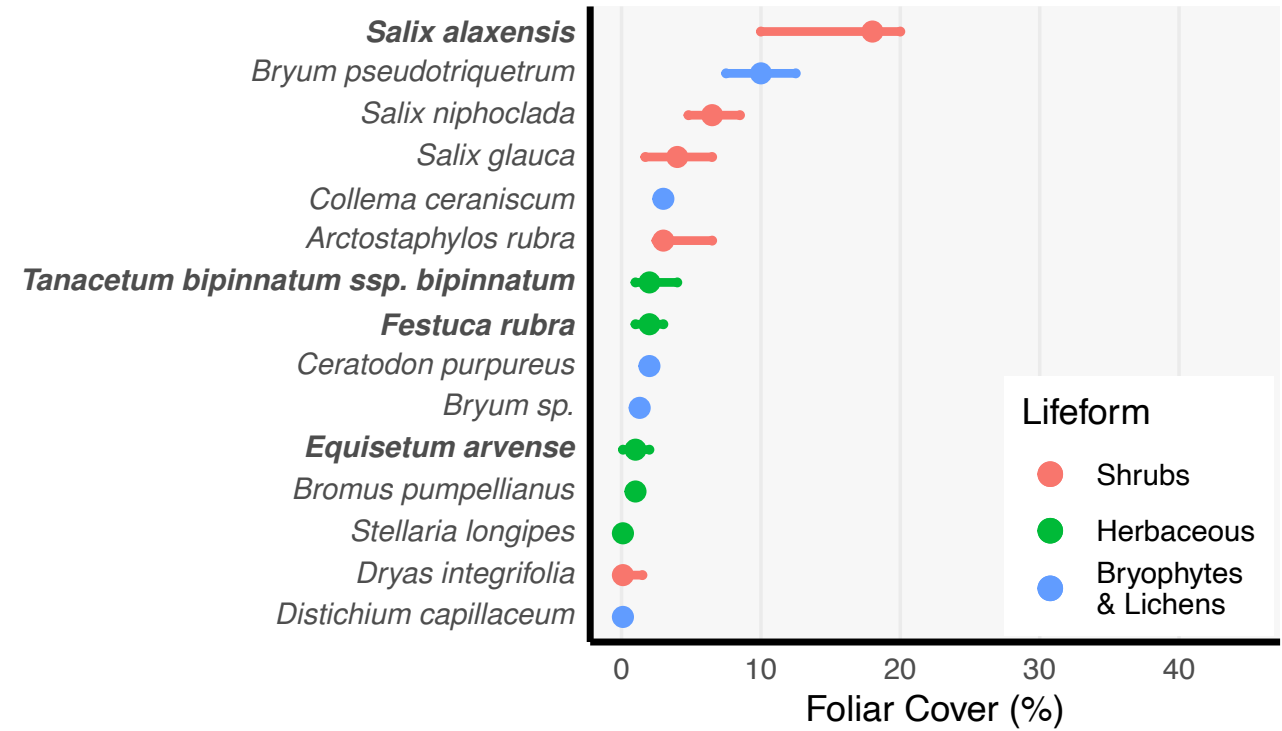

Median and 25th and 75th percentiles of foliar cover for the most common species in 3 lifeform groups in *Salix alaxensis*/*Tanacetum bipinnatum* ssp. *bipinnatum*. Latin names on y-axis in bold font occur in  $\geq 70\%$  of plots in this plant association.



**SALALA/EPILAT: *Salix alaxensis*/*Chamerion latifolium* (n = 8)**

The plant association *Salix alaxensis*/*Chamerion latifolium* occurs in Riverine physiography on the following geomorphic units: Braided Coarse Active Channel Deposit and Meander Coarse Active Channel Deposit. The average elevation in this plant association is 160 m ( $\pm 159$  m), and the slope gradient typically ranges between flat and nearly level. This plant association was associated most commonly with the surface form Nonpatterned, but is also regularly associated with Riverbed Cobbles or Boulders; Rocks, Blockfields; and Scour channels-ridges. Soils are somewhat excessively drained to excessively drained, surface organics are typically absent, coarse fragments are common with an average top depth of 26 cm ( $\pm 70$  cm), dominant soil texture in the upper 40 cm is typically Gravelly or Bouldery, and permafrost was never encountered in the upper 130 cm of the soil profile. Soil pH typically ranges from circumalkaline to alkaline, and the average electrical conductivity is 80  $\mu$ S/cm ( $\pm 57$   $\mu$ S/cm). The most common vegetation type is Partially Vegetated. The vegetation is dominated by *Salix alaxensis*, and *Chamerion latifolium* is always present in the understory at low to moderate cover. Other plant taxa that commonly occur in this plant association at low abundance include, the shrubs *Dasiphora fruticosa*, *Betula nana*, *Vaccinium uliginosum*, and *Salix niphoclada*; the herbs *Artemisia tilesii*, *Astragalus alpinus*, *Wilhelmsia physodes*, and *Eurybia sibirica*; and the nonvasculars *Racomitrium lanuginosum*, *Ceratodon purpureus*, *Aongstroemia longipes*, *Bryoerythrophyllum recurvirostrum*, and *Campylium polygamum*.

A4363p: *Salix alaxensis* River Bar Alliance (proposed)

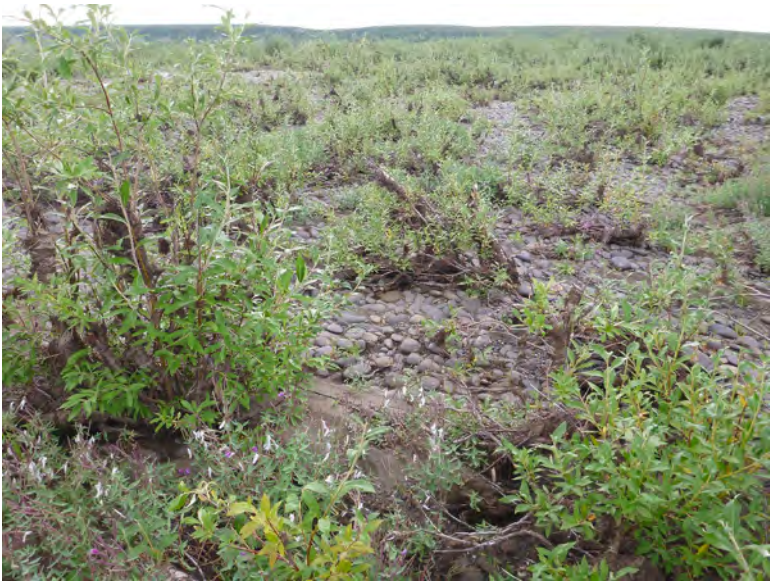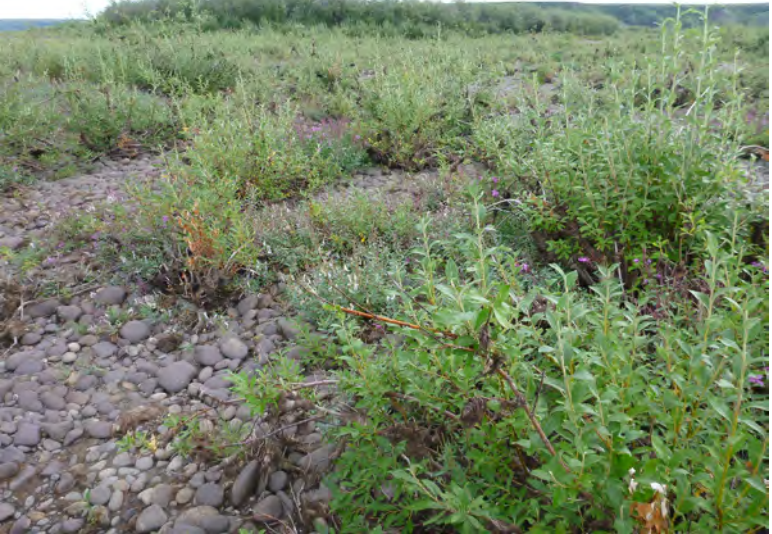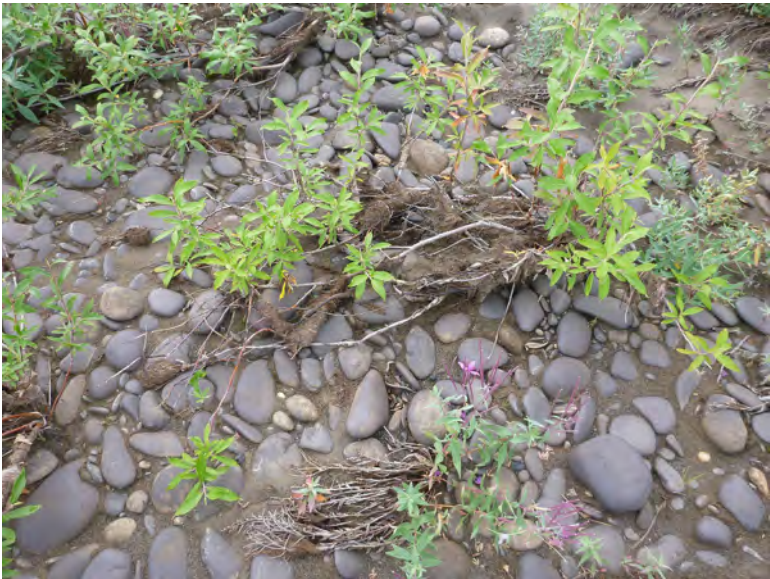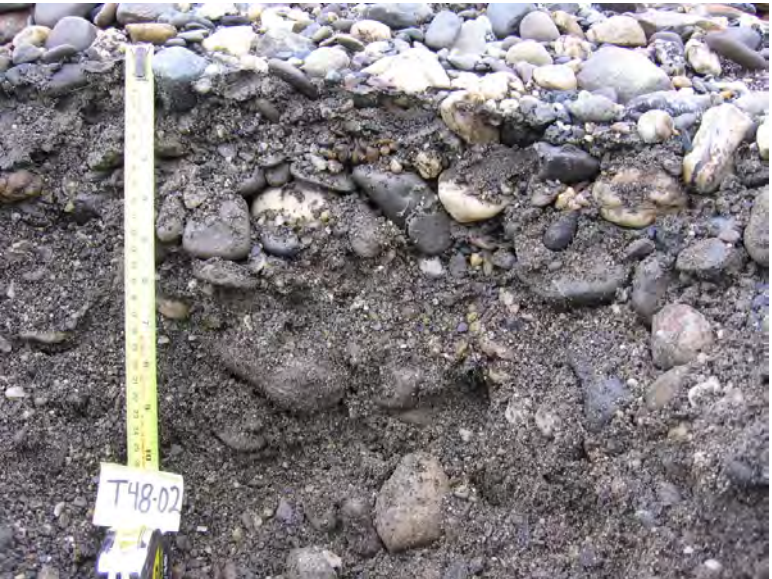

Representative photos (if available) for *Salix alaxensis*/*Chamerion latifolium*. Top row: landscape photos, bottom row: ground photo (left), soil photo (right).

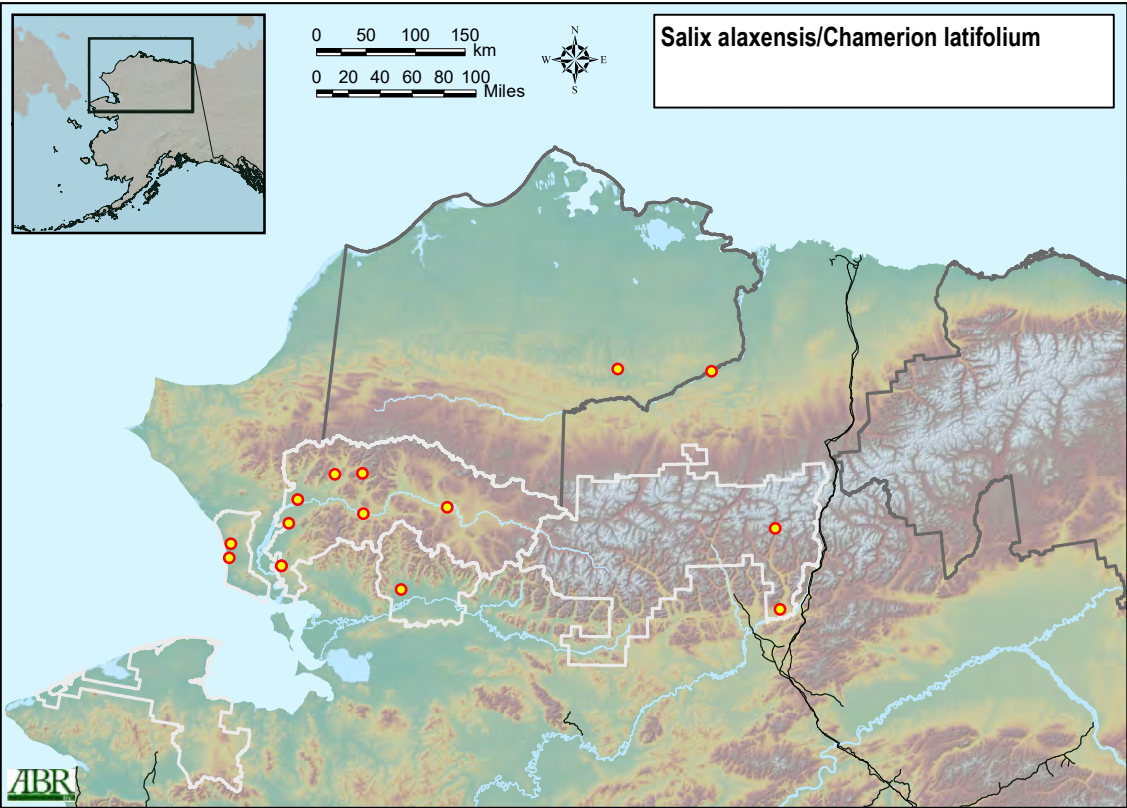

Distribution of *Salix alaxensis*/*Chamerion latifolium* in the study area.



SALALA/EPILAT: *Salix alaxensis*/*Chamerion latifolium*, continued

|                                   | Avg. | Std Dev. | Percentile |      |      | n |
|-----------------------------------|------|----------|------------|------|------|---|
|                                   |      |          | 10th       | 50th | 90th |   |
| Elevation (m)                     | 160  | 159      | 18         | 119  | 322  | 8 |
| Slope (degrees)                   | 1    | 1        | 0          | 0    | 1    | 8 |
| Surface Organic Thickness (cm)    | 0.0  | 0.0      | 0.0        | 0.0  | 0.0  | 8 |
| Cumul. Org. Thickness (cm)        | 0.0  | 0.0      | 0.0        | 0.0  | 0.0  | 8 |
| Depth to >15% Rock Fragments (cm) | 26   | 70       | 0          | 0    | 67   | 8 |
| Water Table Depth (cm)            | -30  |          | -30        | -30  | -30  | 1 |
| Soil Thaw Depth (cm)              |      |          |            |      |      | 8 |
| Site pH                           | 7.8  | 0.5      | 7.0        | 8.0  | 8.3  | 8 |
| Electrical Conductivity (uS/cm)   | 80   | 57       | 30         | 60   | 154  | 7 |
| Whole Tussock Cover (%)           | 0    | 0        | 0          | 0    | 0    | 8 |

Environmental data summaries for *Salix alaxensis*/*Chamerion latifolium*.

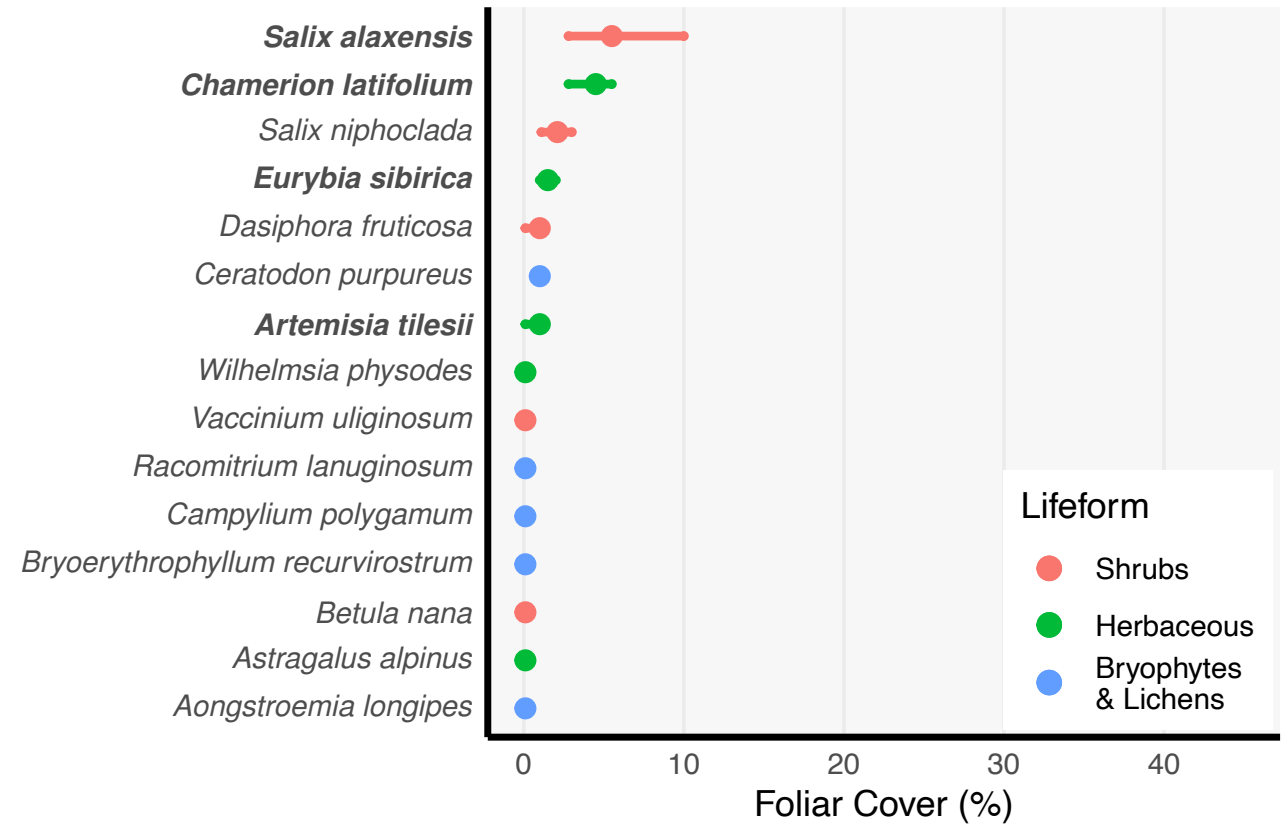

Median and 25th and 75th percentiles of foliar cover for the most common species in 3 lifeform groups in *Salix alaxensis*/*Chamerion latifolium*. Latin names on y-axis in bold font occur in ≥70% of plots in this plant association.

| Lifeform         | Code   | USDA Scientific Name        | Const. | Avg. | Std Dev. | Percentile |      |      |
|------------------|--------|-----------------------------|--------|------|----------|------------|------|------|
|                  |        |                             |        |      |          | 10th       | 50th | 90th |
| Deciduous Shrubs | SAAL   | <i>Salix alaxensis</i>      | 100    | 8.4  | 9.5      | 1.7        | 5.5  | 16.0 |
| Forbs            | ARTI   | <i>Artemisia tilesii</i>    | 75     | 1.0  | 0.5      | 0.1        | 1.0  | 1.0  |
| Forbs            | ASAL7  | <i>Astragalus alpinus</i>   | 63     | 0.1  | 0.0      | 0.1        | 0.1  | 0.1  |
| Forbs            | CHLA13 | <i>Chamerion latifolium</i> | 100    | 5.5  | 5.5      | 1.4        | 4.5  | 10.3 |
| Forbs            | EUSI13 | <i>Eurybia sibirica</i>     | 75     | 1.9  | 1.7      | 1.0        | 1.5  | 3.5  |
| Forbs            | WIPH   | <i>Wilhelmsia physodes</i>  | 63     | 0.1  | 0.4      | 0.1        | 0.1  | 1.0  |

Constancy and foliar cover data summaries for *Salix alaxensis*/*Chamerion latifolium*. Constancy/cover summaries limited to taxa occurring in this plant association with a constancy ≥60 and average cover >0, or taxa with a constancy ≥40 and average cover ≥3.



**SALALA/EQUARV: *Salix alaxensis*/*Equisetum arvense* (n = 11)**

The plant association *Salix alaxensis*/*Equisetum arvense* occurs in Riverine physiography most commonly on the following geomorphic units: Braided Active Overbank Deposit; Delta Inactive Channel Deposit; and Meander Active Overbank Deposit. The average elevation in this plant association is 34 m ( $\pm 50$  m), and the slope gradient is typically flat. This plant association was associated most commonly with the surface form Nonpatterned, but is also regularly associated with Small dunes and Tree mounds (downed logs and root balls). Soils are somewhat poorly drained to well drained, surface organic thickness typically ranges from absent to very thin, coarse fragments are uncommon, but when they do occur the average top depth is 101 cm ( $\pm 72$  cm), dominant soil texture in the upper 40 cm is typically Loamy or Sandy, and permafrost was common with an average active layer thickness of 100 cm ( $\pm 35$  cm). Soil pH is typically alkaline, and the average electrical conductivity is 319  $\mu$ S/cm ( $\pm 228$   $\mu$ S/cm). The most common vegetation types include Open Tall Willow, Closed Tall Willow, and Open Low Willow. The vegetation is dominated by *Salix alaxensis*, and *Equisetum arvense* is always present in the understory at moderate to high cover. Other plant taxa that commonly occur in this plant association at low abundance include, the shrubs *Alnus viridis* ssp. *fruticosa*, *Salix richardsonii*, *Salix glauca*, and *Arctostaphylos rubra*; the herbs *Festuca rubra*, *Artemisia tilesii*, *Petasites frigidus*, and *Eurybia sibirica*; and the nonvasculars *Brachythecium mildeanum*, *Bryum* sp., *Leptobryum pyriforme*, *Campylium stellatum*, and *Brachythecium* sp.

A4363p: *Salix alaxensis* River Bar Alliance (proposed)

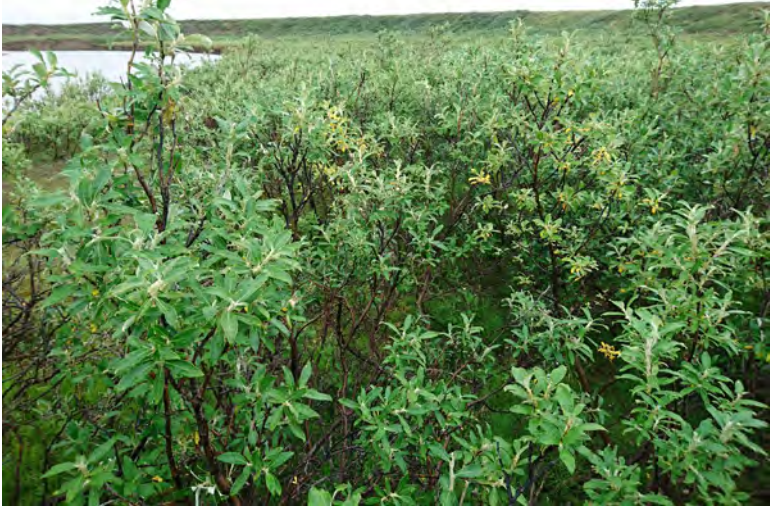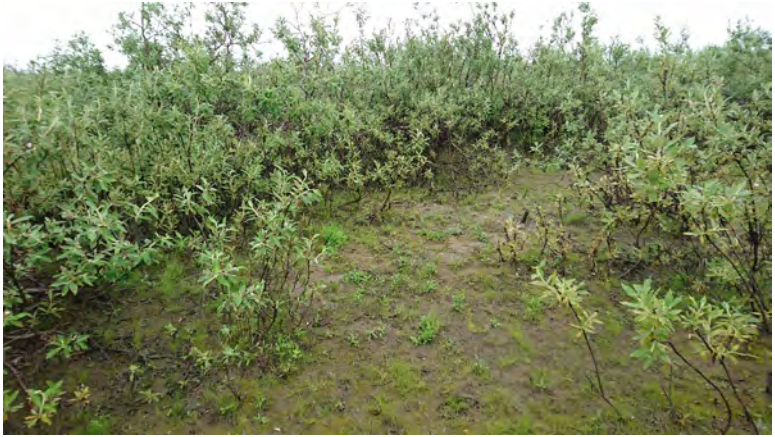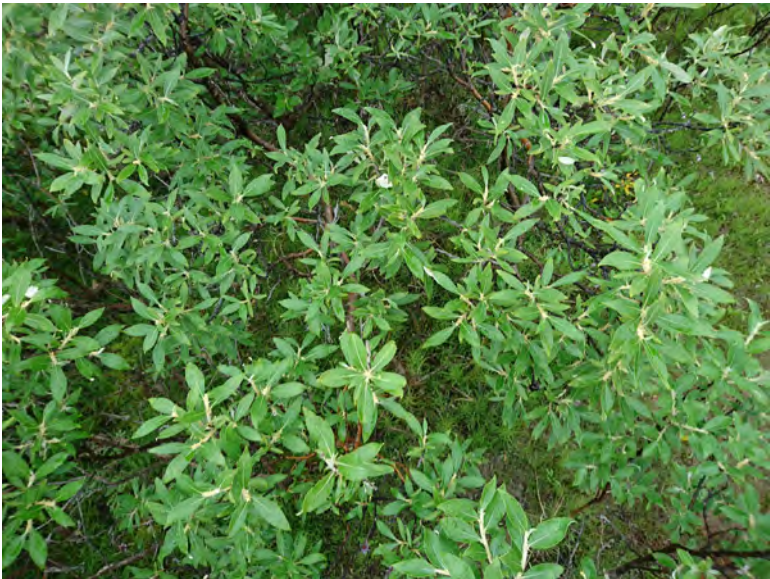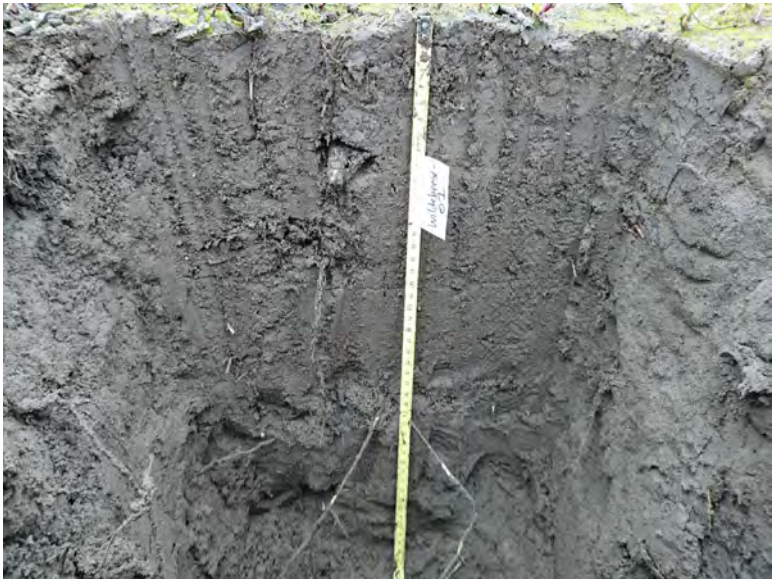

Representative photos (if available) for *Salix alaxensis*/*Equisetum arvense*. Top row: landscape photos, bottom row: ground photo (left), soil photo (right).

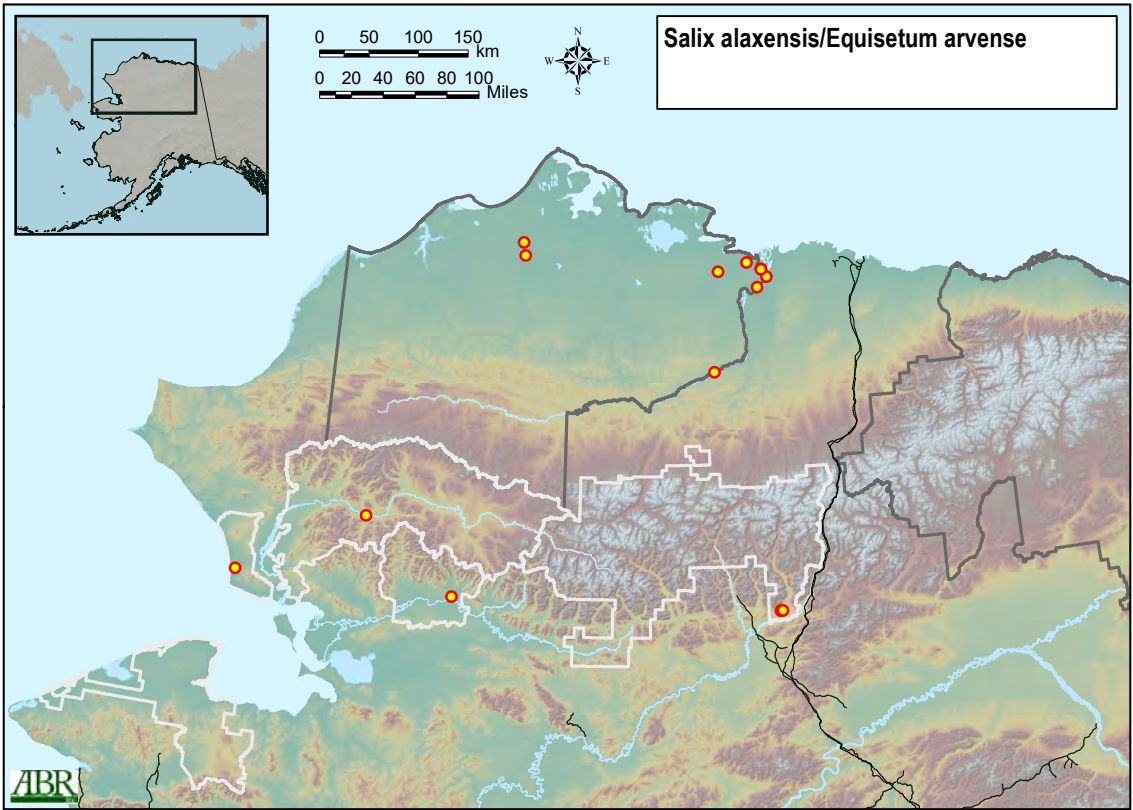

Distribution of *Salix alaxensis*/*Equisetum arvense* in the study area.



SALALA/EQUARV: *Salix alaxensis*/*Equisetum arvense*, continued

|                                   | Avg. | Std Dev. | Percentile |      |      | n  |
|-----------------------------------|------|----------|------------|------|------|----|
|                                   |      |          | 10th       | 50th | 90th |    |
| Elevation (m)                     | 34   | 50       | 2          | 10   | 100  | 10 |
| Slope (degrees)                   | 0    | 0        | 0          | 0    | 0    | 10 |
| Surface Organic Thickness (cm)    | 0.5  | 1.0      | 0.0        | 0.0  | 2.0  | 11 |
| Cumul. Org. Thickness (cm)        | 0.9  | 1.2      | 0.0        | 0.0  | 2.6  | 10 |
| Depth to >15% Rock Fragments (cm) | 101  | 72       | 34         | 98   | 168  | 5  |
| Water Table Depth (cm)            |      |          |            |      |      | 11 |
| Active Layer Thickness (cm)       | 100  | 35       | 69         | 93   | 135  | 5  |
| Site pH                           | 7.7  | 0.3      | 7.3        | 7.8  | 8.0  | 10 |
| Electrical Conductivity (uS/cm)   | 319  | 228      | 90         | 270  | 662  | 9  |
| Whole Tussock Cover (%)           | 0    | 0        | 0          | 0    | 0    | 7  |

Environmental data summaries for *Salix alaxensis*/*Equisetum arvense*.

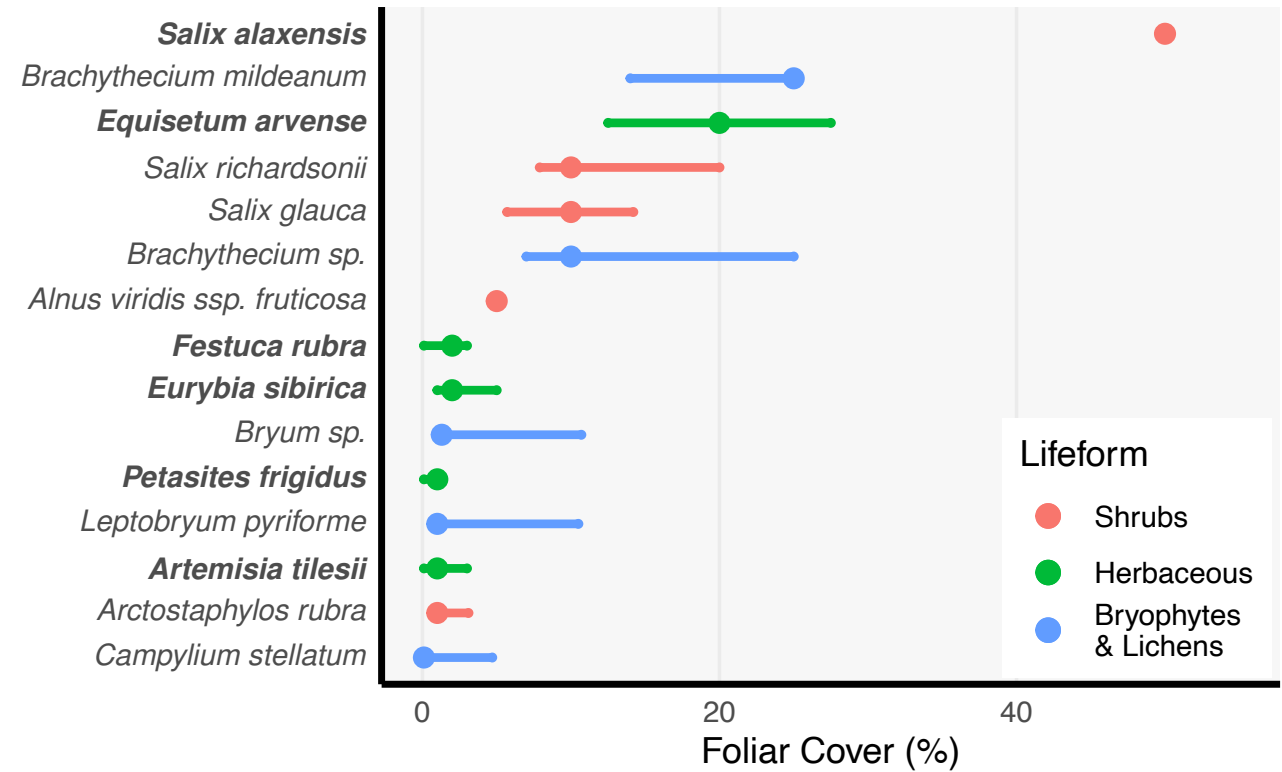

Median and 25th and 75th percentiles of foliar cover for the most common species in 3 lifeform groups in *Salix alaxensis*/*Equisetum arvense*. Latin names on y-axis in bold font occur in ≥70% of plots in this plant association.

| Lifeform         | Code   | USDA Scientific Name                        | Const. | Avg. | Std Dev. | Percentile |      |      |
|------------------|--------|---------------------------------------------|--------|------|----------|------------|------|------|
|                  |        |                                             |        |      |          | 10th       | 50th | 90th |
| Deciduous Shrubs | SAAL   | <i>Salix alaxensis</i>                      | 100    | 51.2 | 22.6     | 24.0       | 50.0 | 75.0 |
| Deciduous Shrubs | SARI4  | <i>Salix richardsonii</i>                   | 45     | 12.6 | 9.9      | 3.2        | 10.0 | 23.0 |
| Forbs            | ARTI   | <i>Artemisia tilesii</i>                    | 82     | 1.9  | 2.2      | 0.1        | 1.0  | 5.2  |
| Forbs            | EUSI13 | <i>Eurybia sibirica</i>                     | 91     | 3.1  | 3.2      | 0.1        | 2.0  | 5.5  |
| Forbs            | PEFR5  | <i>Petasites frigidus</i>                   | 73     | 2.5  | 5.1      | 0.1        | 1.0  | 5.4  |
| Forbs            | TABIB  | <i>Tanacetum bipinnatum ssp. bipinnatum</i> | 64     | 2.8  | 1.3      | 1.3        | 3.0  | 3.8  |
| Ferns & Allies   | EQAR   | <i>Equisetum arvense</i>                    | 100    | 21.0 | 11.0     | 10.0       | 20.0 | 30.3 |
| Grasses          | FERU2  | <i>Festuca rubra</i>                        | 82     | 2.6  | 3.6      | 0.1        | 2.0  | 4.8  |

Constancy and foliar cover data summaries for *Salix alaxensis*/*Equisetum arvense*. Constancy/cover summaries limited to taxa occurring in this plant association with a constancy ≥60 and average cover >0, or taxa with a constancy ≥40 and average cover ≥3.



**SALGLA/ARCRUB1: *Salix glauca*/*Arctostaphylos rubra* (n = 8)**

The plant association *Salix glauca*/*Arctostaphylos rubra* occurs in Riverine and Upland physiography most commonly on the following geomorphic units: Eolian Inactive Sand Dune; Meander Inactive Overbank Deposit; and Braided Inactive Overbank Deposit. The average elevation in this plant association is 85 m ( $\pm 126$  m), and the slope gradient typically ranges between flat and nearly level. This plant association was associated most commonly with the surface form Nonpatterned, but is also regularly associated with Small dunes and Undifferentiated mounds. Soils are moderately well drained to well drained, surface organic thickness typically ranges from absent to thin, coarse fragments are uncommon, but when they do occur the average top depth is 85 cm ( $\pm 100$  cm), dominant soil texture in the upper 40 cm is typically Sandy or Loamy, and permafrost was common with an average active layer thickness of 78 cm ( $\pm 27$  cm). Soil pH typically ranges from circumalkaline to alkaline, and the average electrical conductivity is 104  $\mu$ S/cm ( $\pm 79$   $\mu$ S/cm). The most common vegetation type is Open Low Willow. The vegetation is dominated by *Salix glauca*, and *Arctostaphylos rubra* is always present in the understory at moderate to high cover. Other plant taxa that commonly occur in this plant association at low abundance include, the shrubs *Salix richardsonii*, *Salix reticulata*, and *Dryas integrifolia*; the herbs *Festuca rubra*, *Carex krausei*, *Eurybia sibirica*, *Equisetum arvense*, and *Astragalus alpinus*; and the nonvasculars *Aulacomnium palustre*, *Distichium capillaceum*, *Rhytidium rugosum*, *Hylocomium splendens*, and *Tomentypnum nitens*.

A4364p: *Salix glauca* River Bar & Dune Alliance (proposed)

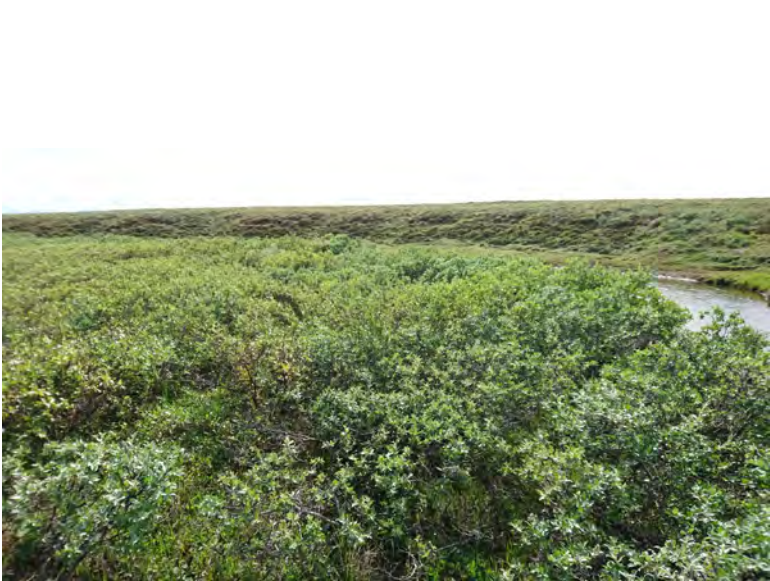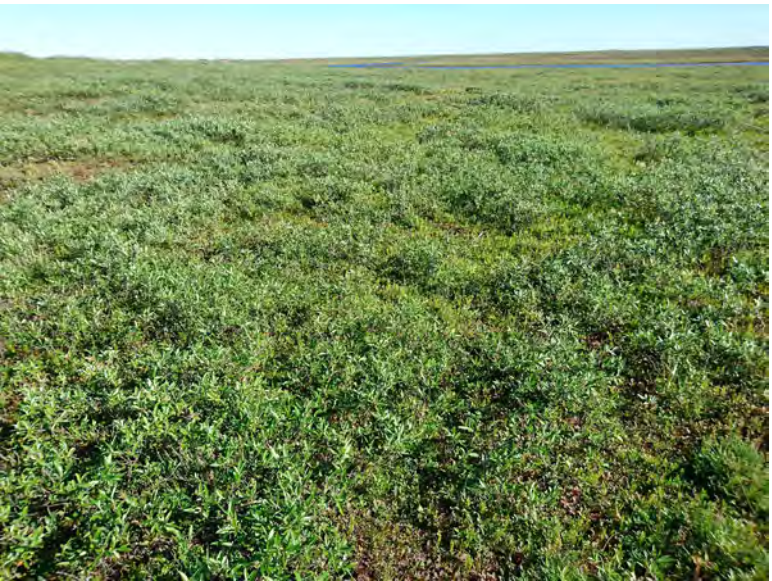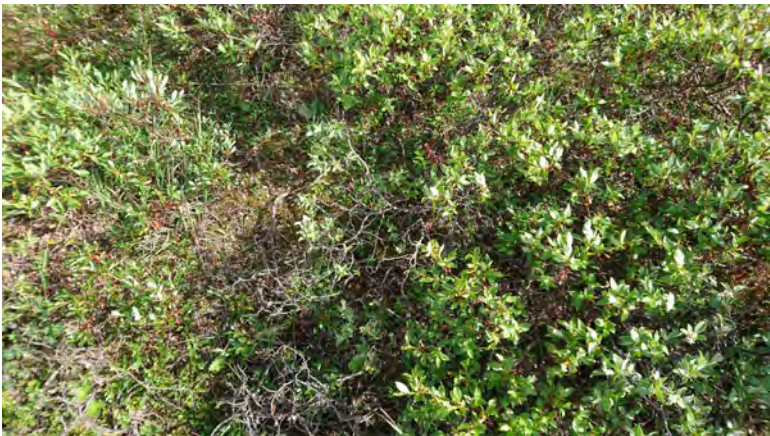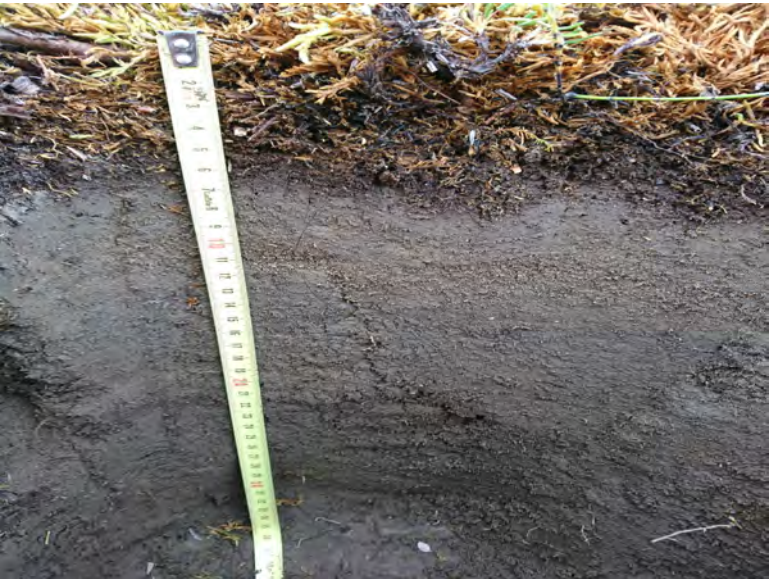

Representative photos (if available) for *Salix glauca*/*Arctostaphylos rubra*. Top row: landscape photos, bottom row: ground photo (left), soil photo (right).

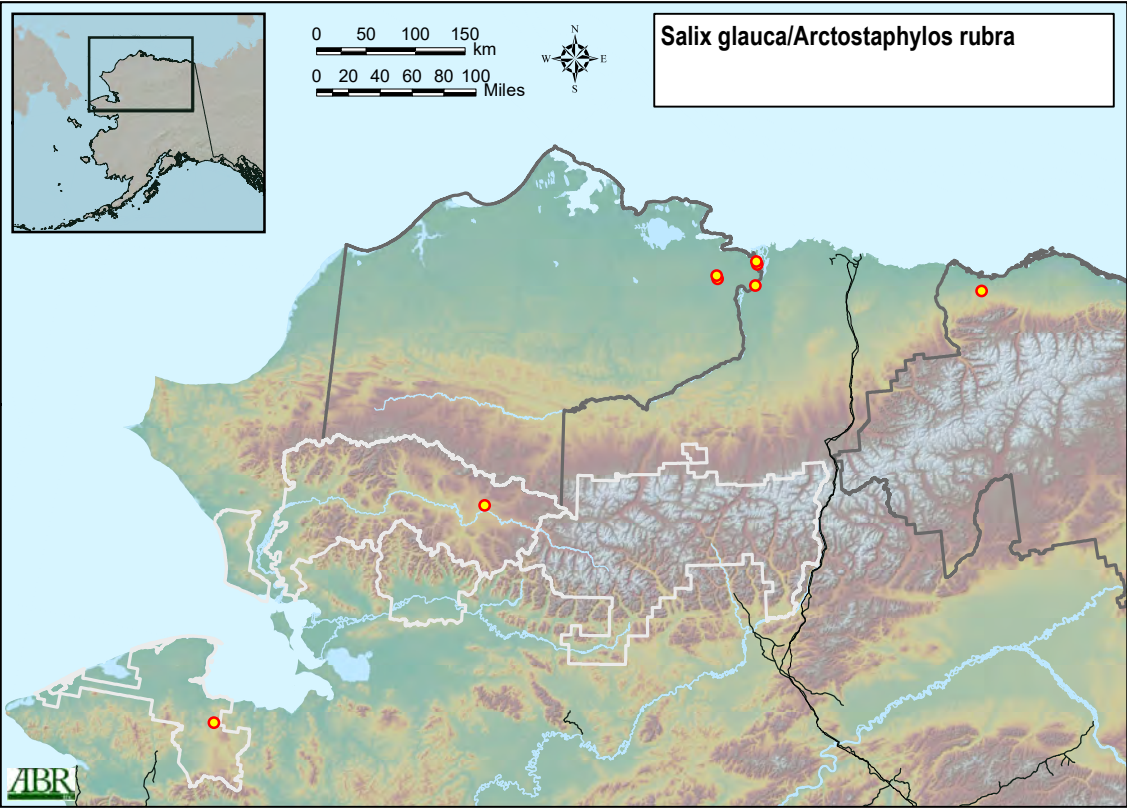

Distribution of *Salix glauca*/*Arctostaphylos rubra* in the study area.



SALGLA/ARCRUB1: *Salix glauca*/Arctostaphylos rubra, continued

|                                   | Avg. | Std Dev. | Percentile |      |      | n |
|-----------------------------------|------|----------|------------|------|------|---|
|                                   |      |          | 10th       | 50th | 90th |   |
| Elevation (m)                     | 85   | 126      | 5          | 15   | 226  | 8 |
| Slope (degrees)                   | 2    | 2        | 0          | 2    | 4    | 8 |
| Surface Organic Thickness (cm)    | 4.0  | 3.9      | 0.0        | 4.1  | 7.9  | 8 |
| Cumul. Org. Thickness (cm)        | 5.0  | 5.1      | 0.0        | 4.6  | 10.5 | 8 |
| Depth to >15% Rock Fragments (cm) | 85   | 100      | 23         | 36   | 167  | 3 |
| Water Table Depth (cm)            | -45  |          | -45        | -45  | -45  | 1 |
| Active Layer Thickness (cm)       | 78   | 27       | 56         | 72   | 104  | 4 |
| Site pH                           | 7.6  | 0.6      | 6.9        | 7.6  | 8.2  | 8 |
| Electrical Conductivity (uS/cm)   | 104  | 79       | 37         | 80   | 223  | 8 |
| Whole Tussock Cover (%)           | 0    | 0        | 0          | 0    | 0    | 4 |

Environmental data summaries for *Salix glauca*/Arctostaphylos rubra.

| Lifeform         | Code   | USDA Scientific Name | Const. | Avg. | Std Dev. | Percentile |      |      |
|------------------|--------|----------------------|--------|------|----------|------------|------|------|
|                  |        |                      |        |      |          | 10th       | 50th | 90th |
| Deciduous Shrubs | ARRU   | Arctostaphylos rubra | 100    | 21.9 | 15.9     | 4.8        | 19.9 | 36.8 |
| Deciduous Shrubs | SAGL   | Salix glauca         | 100    | 28.4 | 12.9     | 16.4       | 27.0 | 45.0 |
| Deciduous Shrubs | SARE2  | Salix reticulata     | 75     | 8.0  | 8.9      | 2.0        | 4.5  | 17.5 |
| Deciduous Shrubs | SARI4  | Salix richardsonii   | 88     | 8.2  | 6.6      | 1.8        | 5.0  | 15.0 |
| Evergreen Shrubs | DRIN4  | Dryas integrifolia   | 63     | 8.3  | 6.5      | 2.0        | 7.0  | 15.0 |
| Forbs            | ASAL7  | Astragalus alpinus   | 63     | 12.7 | 16.1     | 0.1        | 3.0  | 30.8 |
| Forbs            | EUSI13 | Eurybia sibirica     | 63     | 0.1  | 0.4      | 0.1        | 0.1  | 1.0  |
| Ferns & Allies   | EQAR   | Equisetum arvense    | 75     | 1.0  | 0.6      | 0.1        | 1.0  | 1.2  |
| Grasses          | FERU2  | Festuca rubra        | 63     | 1.3  | 1.1      | 0.1        | 1.0  | 2.3  |
| Sedges           | CAKR2  | Carex krausei        | 63     | 0.1  | 0.5      | 0.1        | 0.1  | 1.0  |
| Mosses           | HYSP70 | Hylocomium splendens | 63     | 18.8 | 11.0     | 7.0        | 25.0 | 28.0 |
| Mosses           | TONI70 | Tomentypnum nitens   | 50     | 21.3 | 12.5     | 9.5        | 22.5 | 32.0 |

Constancy and foliar cover data summaries for *Salix glauca*/Arctostaphylos rubra. Constancy/cover summaries limited to taxa occurring in this plant association with a constancy ≥60 and average cover >0, or taxa with a constancy ≥40 and average cover ≥3.

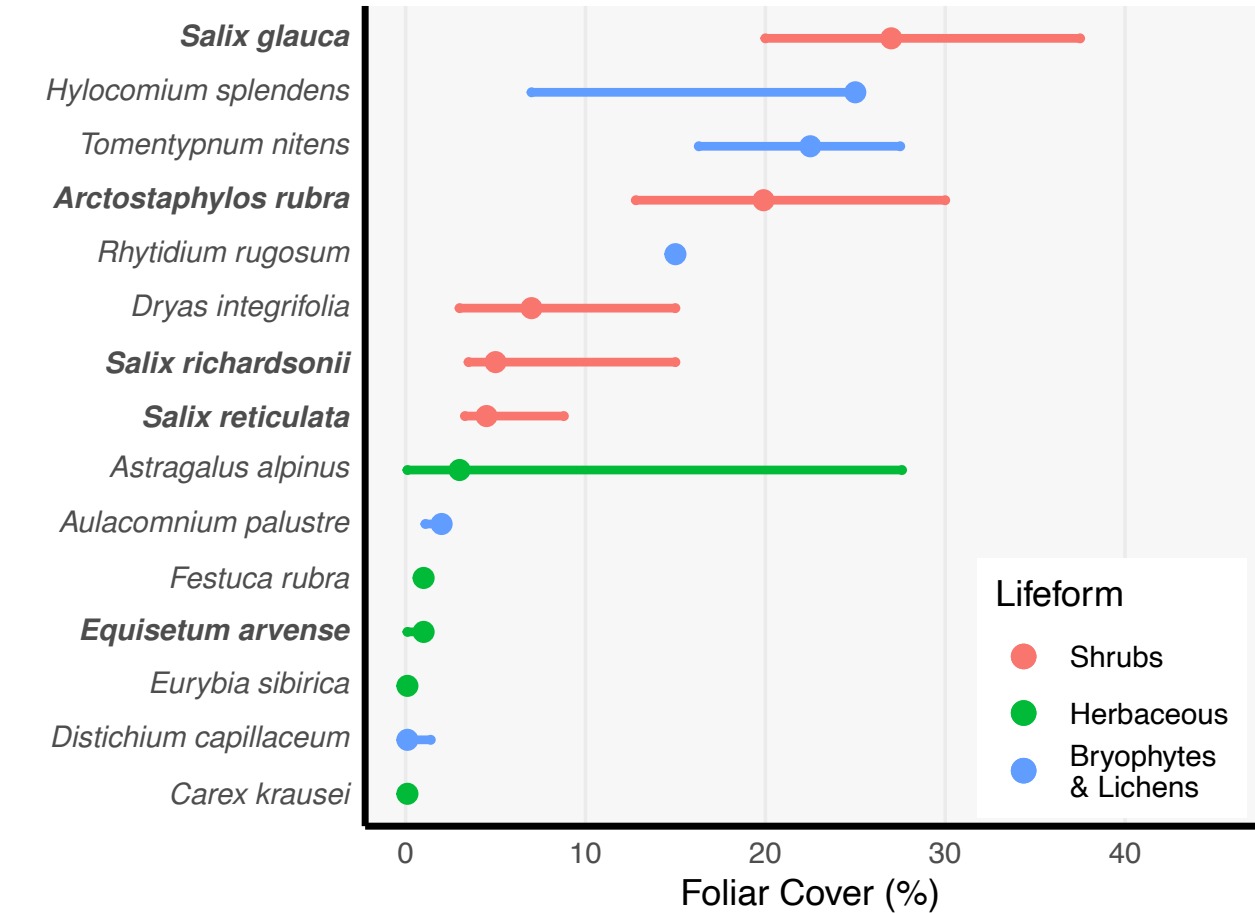

Median and 25th and 75th percentiles of foliar cover for the most common species in 3 lifeform groups in *Salix glauca*/Arctostaphylos rubra. Latin names on y-axis in bold font occur in ≥70% of plots in this plant association.



**SALGLA/DRYINT/CARBIG: *Salix glauca*/*Dryas integrifolia*/*Carex bigelowii* (n = 5)**

A4338: Arctic Nonacidic Low Willow Tundra Alliance

The plant association *Salix glauca*/*Dryas integrifolia*/*Carex bigelowii* occurs in Riverine and Upland physiography most commonly on the following geomorphic units: Delta Inactive Over-bank Deposit; Frozen Upland Silt; and Hillside Colluvium. The average elevation in this plant association is 71m ( $\pm 49$ m), and the slope gradient typically ranges between nearly level and gently sloping. This plant association was associated with the surface form Nonpatterned. Soils are poorly drained to somewhat poorly drained, surface organic thickness typically ranges from very thin to thin, coarse fragments are rare, but when they do occur the average top depth is 0 cm ( $\pm 0$ cm), dominant soil texture in the upper 40 cm is typically Loamy, and permafrost was common with an average active layer thickness of 45cm ( $\pm 19$ cm). Soil pH typically ranges from circumacidic to circumalkaline, and the average electrical conductivity is 214  $\mu$ S/cm ( $\pm 68 \mu$ S/cm). The most common vegetation types include Open Low Willow, Dryas-Forb Dwarf Shrub Tundra, and Moist Sedge-Shrub Tundra. The vegetation is dominated by *Salix glauca*, which typically forms an open low shrub canopy, and *Dryas integrifolia* is the most common and abundant species in the dwarf shrub layer. *Carex bigelowii* is always present at low to moderate cover. Other plant taxa that commonly occur in this plant association at low abundance include, the shrubs *Salix reticulata*, *Cassiope tetragona*, and *Vaccinium uliginosum*; the herbs *Lupinus arcticus*, *Arctagrostis latifolia*, *Pedicularis capitata*, and *Pyrola grandiflora*; and the nonvasculars *Hylocomium splendens*, *Flavocetraria cucullata*, *Aulacomnium turgidum*, *Tomentypnum nitens*, and *Thamnia subuliformis*.

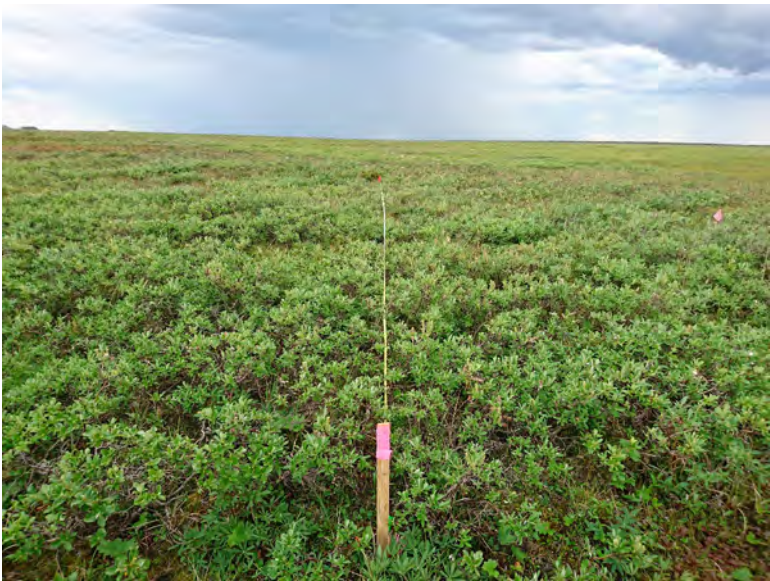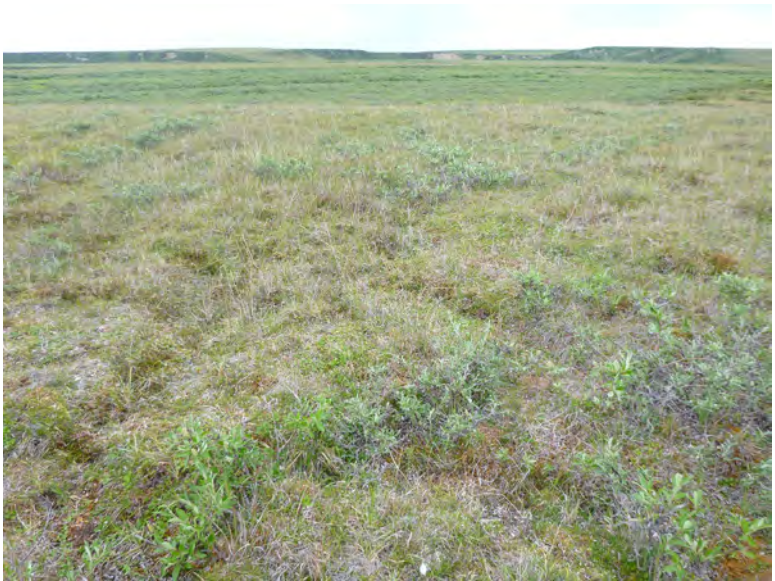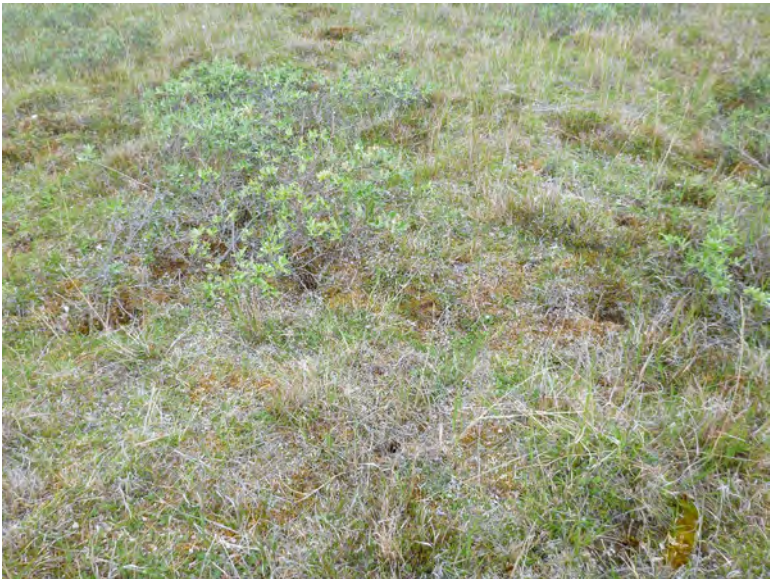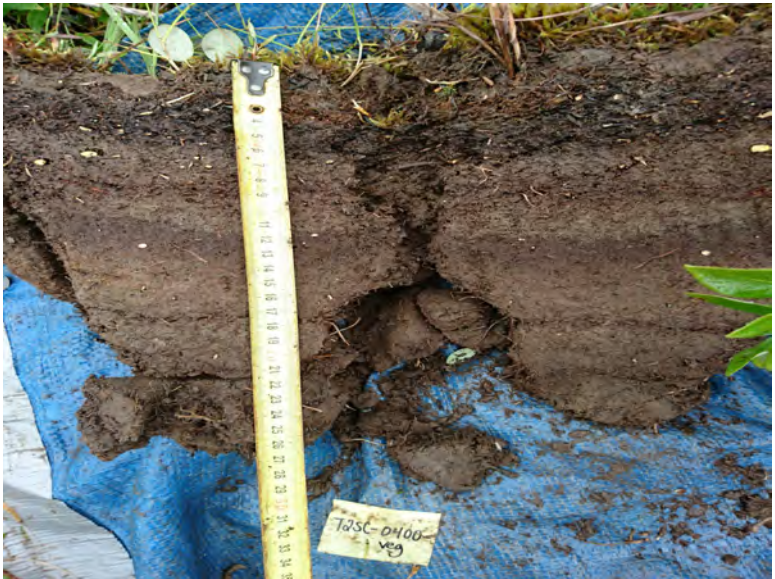

Representative photos (if available) for *Salix glauca*/*Dryas integrifolia*/*Carex bigelowii*. Top row: landscape photos, bottom row: ground photo (left), soil photo (right).

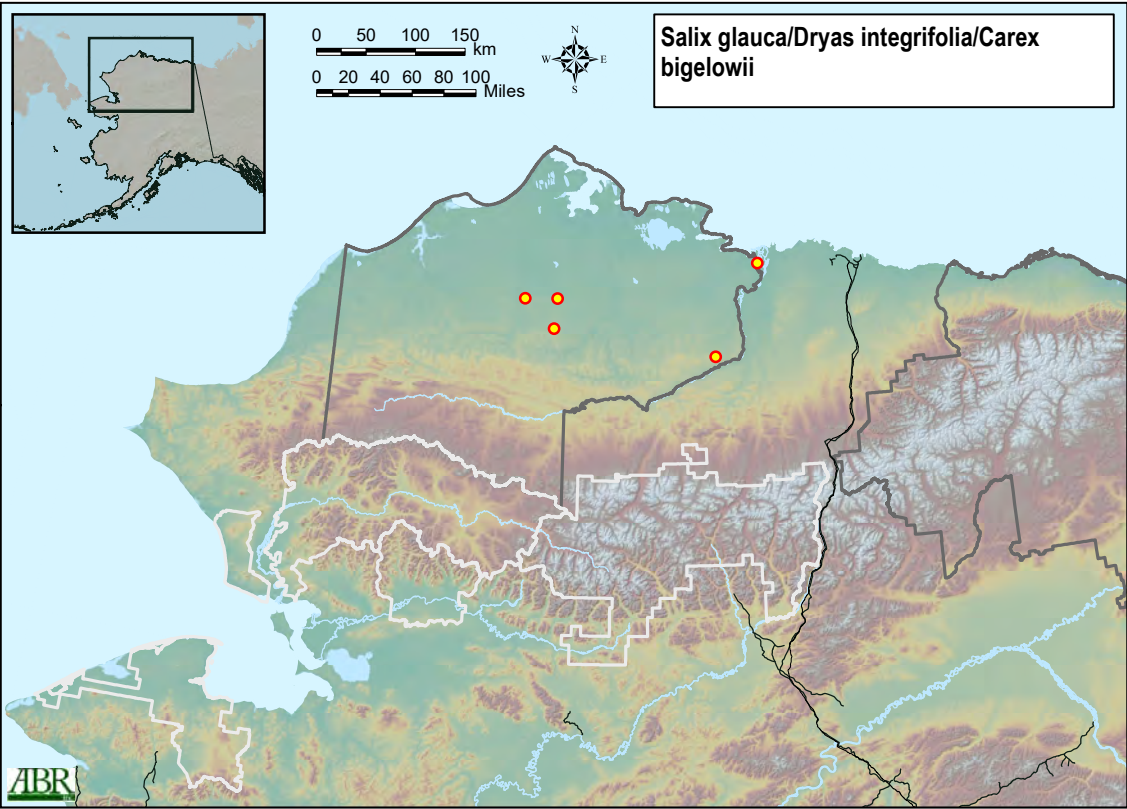

Distribution of *Salix glauca*/*Dryas integrifolia*/*Carex bigelowii* in the study area.



SALGLA/DRYINT/CARBIG: *Salix glauca*/*Dryas integrifolia*/*Carex bigelowii*, continued

|                                   | Avg. | Std Dev. | Percentile |      |      | n |
|-----------------------------------|------|----------|------------|------|------|---|
|                                   |      |          | 10th       | 50th | 90th |   |
| Elevation (m)                     | 71   | 49       | 21         | 74   | 118  | 5 |
| Slope (degrees)                   | 3    | 2        | 0          | 3    | 5    | 5 |
| Surface Organic Thickness (cm)    | 5.4  | 5.0      | 0.8        | 6.0  | 10.2 | 5 |
| Cumul. Org. Thickness (cm)        | 9.0  | 6.4      | 3.6        | 6.0  | 16.0 | 5 |
| Depth to >15% Rock Fragments (cm) | 0    |          | 0          | 0    | 0    | 1 |
| Water Table Depth (cm)            | -39  |          | -39        | -39  | -39  | 1 |
| Active Layer Thickness (cm)       | 45   | 19       | 27         | 49   | 60   | 4 |
| Site pH                           | 6.8  | 0.8      | 5.9        | 7.0  | 7.4  | 5 |
| Electrical Conductivity (uS/cm)   | 214  | 68       | 142        | 240  | 276  | 5 |
| Whole Tussock Cover (%)           | 12   | 16       | 1          | 6    | 27   | 4 |

Environmental data summaries for *Salix glauca*/*Dryas integrifolia*/*Carex bigelowii*.

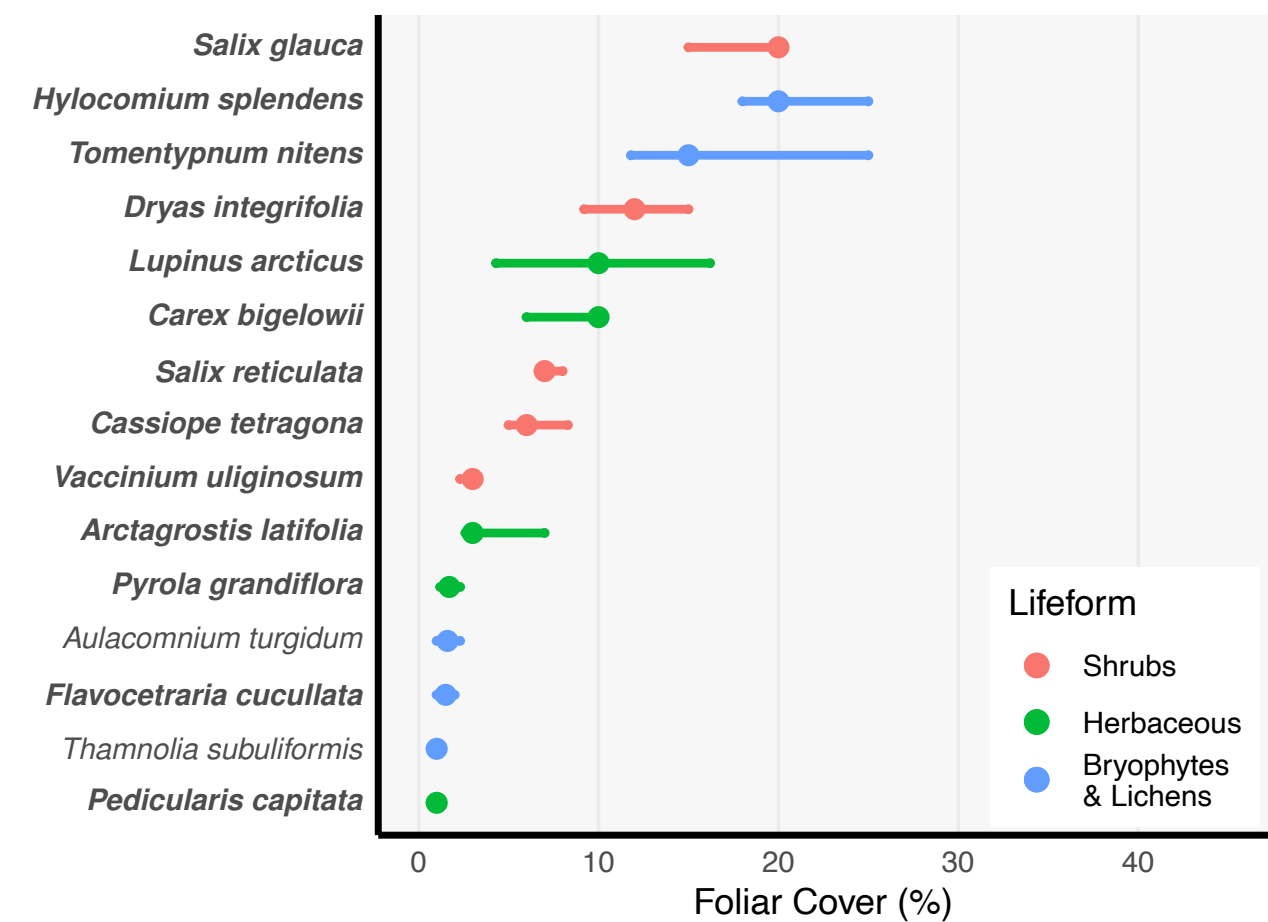

Median and 25th and 75th percentiles of foliar cover for the most common species in 3 lifeform groups in *Salix glauca*/*Dryas integrifolia*/*Carex bigelowii*. Latin names on y-axis in bold font occur in ≥70% of plots in this plant association.

| Lifeform         | Code   | USDA Scientific Name                           | Const. | Avg. | Std Dev. | Percentile |      |      |
|------------------|--------|------------------------------------------------|--------|------|----------|------------|------|------|
|                  |        |                                                |        |      |          | 10th       | 50th | 90th |
| Deciduous Shrubs | ARRU   | <i>Arctostaphylos rubra</i>                    | 60     | 2.9  | 2.0      | 1.3        | 2.6  | 4.5  |
| Deciduous Shrubs | SAGL   | <i>Salix glauca</i>                            | 100    | 20.0 | 8.8      | 12.6       | 20.0 | 28.5 |
| Deciduous Shrubs | SAPU15 | <i>Salix pulchra</i>                           | 40     | 3.0  | 1.4      | 2.2        | 3.0  | 3.8  |
| Deciduous Shrubs | SARE2  | <i>Salix reticulata</i>                        | 100    | 10.3 | 6.8      | 7.0        | 7.0  | 16.6 |
| Deciduous Shrubs | SARI4  | <i>Salix richardsonii</i>                      | 60     | 6.9  | 0.2      | 6.7        | 7.0  | 7.0  |
| Deciduous Shrubs | VAUL   | <i>Vaccinium uliginosum</i>                    | 80     | 2.3  | 1.5      | 1.0        | 3.0  | 3.0  |
| Evergreen Shrubs | CATE11 | <i>Cassiope tetragona</i>                      | 80     | 7.3  | 3.3      | 5.0        | 6.0  | 10.5 |
| Evergreen Shrubs | DRIN4  | <i>Dryas integrifolia</i>                      | 100    | 13.0 | 4.6      | 9.1        | 12.0 | 18.0 |
| Forbs            | LUAR2  | <i>Lupinus arcticus</i>                        | 80     | 10.4 | 8.3      | 2.9        | 10.0 | 18.3 |
| Forbs            | PECA2  | <i>Pedicularis capitata</i>                    | 100    | 1.0  | 0.4      | 0.1        | 1.0  | 1.0  |
| Forbs            | PEFR5  | <i>Petasites frigidus</i>                      | 60     | 4.3  | 1.5      | 3.2        | 4.0  | 5.6  |
| Forbs            | POBIP2 | <i>Polygonum bistorta</i> ssp. <i>plumosum</i> | 60     | 1.0  | 1.0      | 0.1        | 1.0  | 1.8  |
| Forbs            | POVI3  | <i>Polygonum viviparum</i>                     | 80     | 0.1  | 0.5      | 0.1        | 0.1  | 1.0  |
| Forbs            | PYGR   | <i>Pyrola grandiflora</i>                      | 80     | 1.8  | 0.9      | 1.1        | 1.7  | 2.7  |
| Forbs            | SAAN3  | <i>Saussurea angustifolia</i>                  | 80     | 1.0  | 0.8      | 0.1        | 1.0  | 1.7  |
| Forbs            | STLO2  | <i>Stellaria longipes</i>                      | 60     | 0.1  | 0.0      | 0.1        | 0.1  | 0.1  |
| Ferns & Allies   | EQAR   | <i>Equisetum arvense</i>                       | 40     | 5.0  | 2.8      | 3.4        | 5.0  | 6.6  |
| Grasses          | ARLA2  | <i>Arctagrostis latifolia</i>                  | 100    | 4.3  | 2.5      | 2.3        | 3.0  | 7.0  |
| Sedges           | CABI5  | <i>Carex bigelowii</i>                         | 100    | 8.7  | 4.7      | 4.0        | 10.0 | 13.0 |
| Mosses           | HYSP70 | <i>Hylocomium splendens</i>                    | 100    | 20.6 | 10.9     | 10.2       | 20.0 | 31.0 |
| Mosses           | TONI70 | <i>Tomentypnum nitens</i>                      | 100    | 21.4 | 14.4     | 10.7       | 15.0 | 37.0 |
| Lichens          | FLCU   | <i>Flavocetraria cucullata</i>                 | 80     | 1.5  | 0.6      | 1.0        | 1.5  | 2.0  |
| Lichens          | THSU60 | <i>Thamnolia subuliformis</i>                  | 60     | 1.0  | 0.5      | 0.1        | 1.0  | 1.0  |

Constancy and foliar cover data summaries for *Salix glauca*/*Dryas integrifolia*/*Carex bigelowii*. Constancy/cover summaries limited to taxa occurring in this plant association with a constancy ≥60 and average cover >0, or taxa with a constancy ≥40 and average cover ≥3.



**SALGLA/DRYINT/RHYRUG: *Salix glauca*/*Dryas integrifolia*/*Rhytidium rugosum* (n = 5)**

A4338: Arctic Nonacidic Low Willow Tundra Alliance

The plant association *Salix glauca*/*Dryas integrifolia*/*Rhytidium rugosum* occurs in Lowland and Upland physiography most commonly on the following geomorphic units: Eolian Sand Sheet Upland; Frozen Upland Silt; and Hillside Colluvium. The average elevation in this plant association is 53 m ( $\pm 50$  m), and the slope gradient typically ranges between flat and gently sloping. This plant association was associated most commonly with the surface form Hummocks, but is also regularly associated with Nonpatterned and High-centered, High-relief Polygons. Soils are moderately well drained to well drained, surface organic thickness is typically thin, coarse fragments are rare, but when they do occur the average top depth is 48 cm ( $\pm 0$  cm), dominant soil texture in the upper 40 cm is typically Loamy or Organic-rich, and permafrost was common with an average active layer thickness of 58 cm ( $\pm 35$  cm). Soil pH typically ranges from circumacidic to alkaline, and the average electrical conductivity is 165  $\mu$ S/cm ( $\pm 68$   $\mu$ S/cm). The most common vegetation types include Open Low Willow and *Dryas Dwarf* Shrub Tundra. The vegetation is dominated by *Salix glauca*, which typically forms an open low shrub canopy, and *Dryas integrifolia* is the most common and abundant species in the dwarf shrub layer. *Rhytidium rugosum* is always present at low to moderate cover. Other plant taxa that commonly occur in this plant association at low abundance include, the shrubs *Salix reticulata*, *Cassiope tetragona*, and *Arctostaphylos rubra*; the herbs *Saussurea angustifolia*, *Astragalus alpinus*, *Pedicularis capitata*, *Poa arctica*, and *Stellaria longipes*; and the nonvasculars *Hylocomium splendens*, *Flavocetraria cucullata*, *Tomentypnum nitens*, and *Masonhalea richardsonii*.

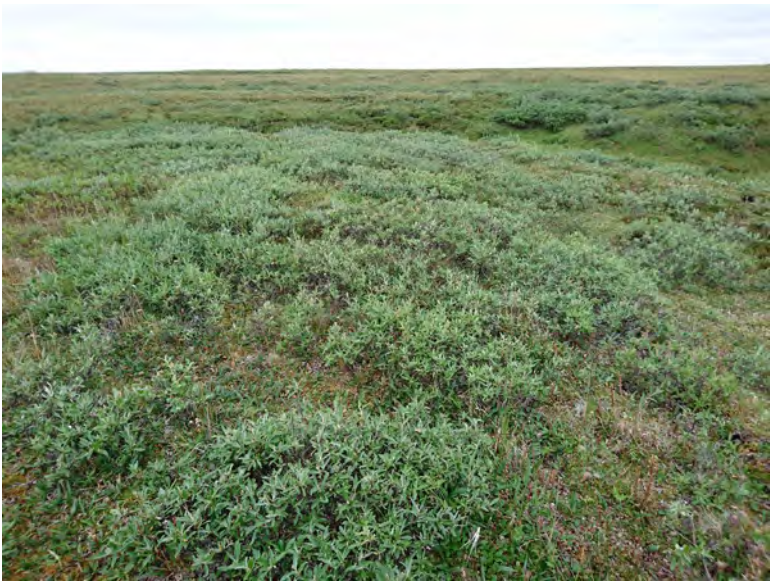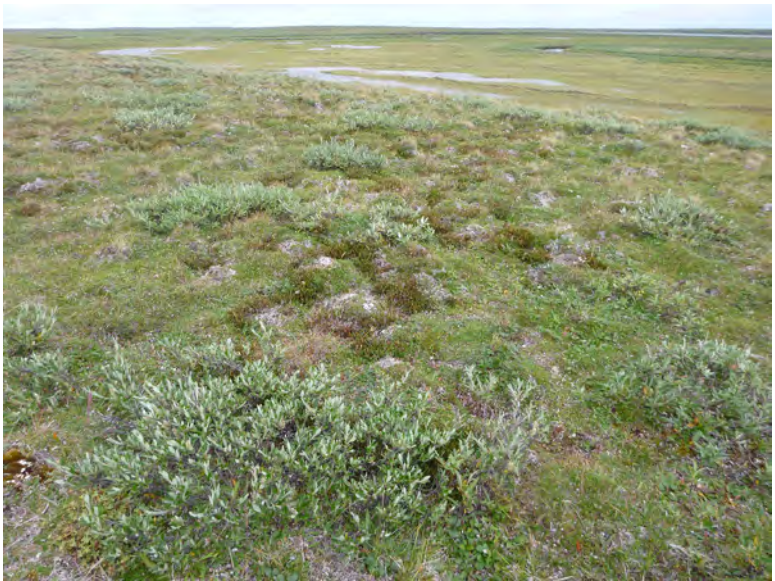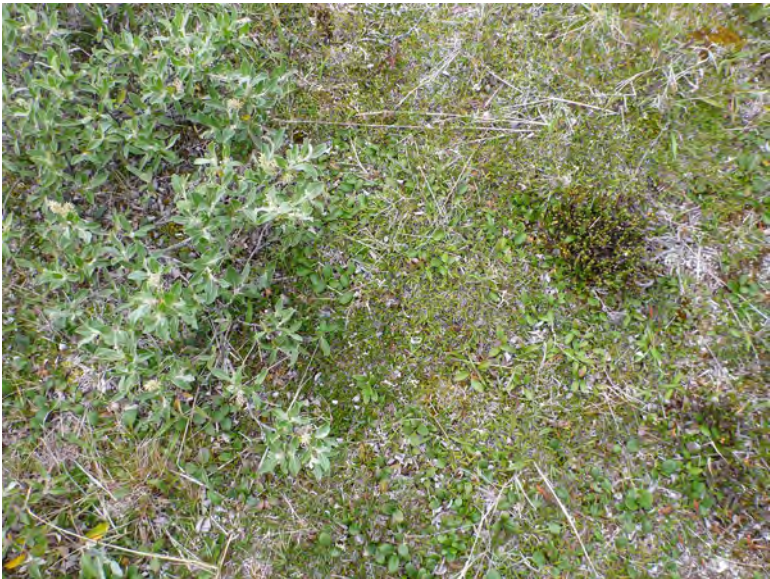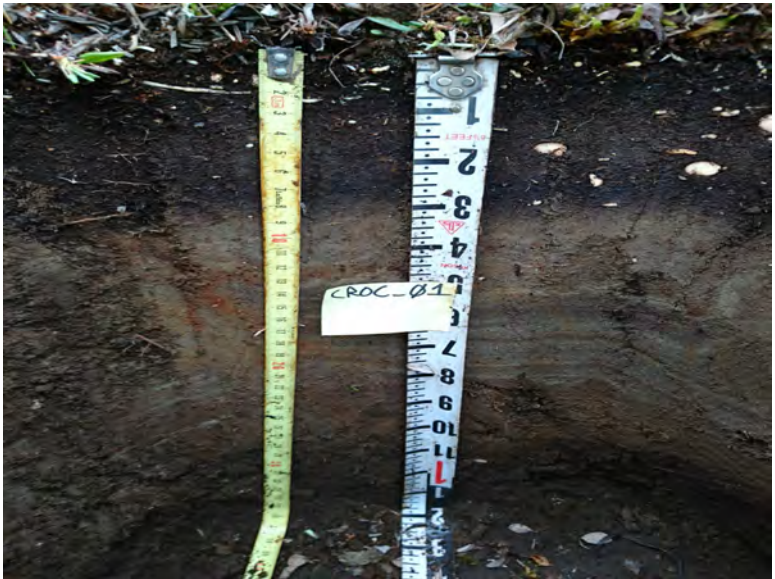

Representative photos (if available) for *Salix glauca*/*Dryas integrifolia*/*Rhytidium rugosum*. Top row: landscape photos, bottom row: ground photo (left), soil photo (right).

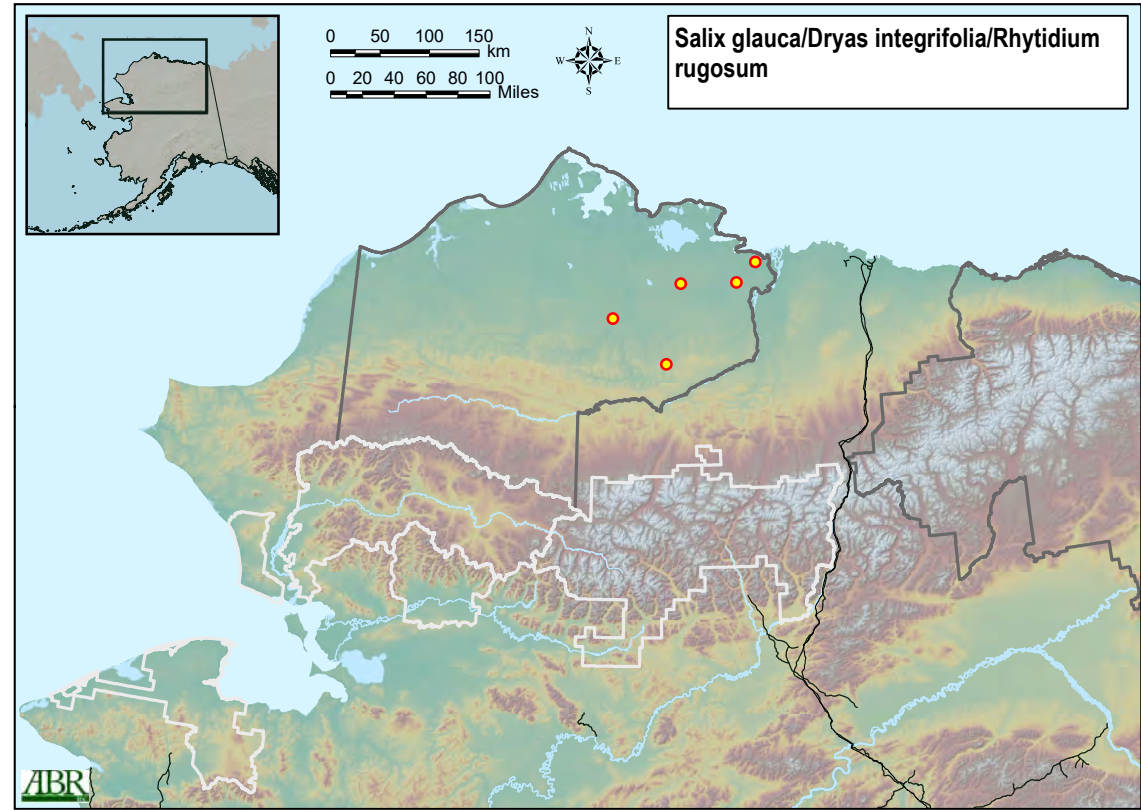

Distribution of *Salix glauca*/*Dryas integrifolia*/*Rhytidium rugosum* in the study area.



SALGLA/DRYINT/RHYRUG: *Salix glauca*/*Dryas integrifolia*/*Rhytidium rugosum*, continued

|                                   | Avg. | Std Dev. | Percentile |      |      | n |
|-----------------------------------|------|----------|------------|------|------|---|
|                                   |      |          | 10th       | 50th | 90th |   |
| Elevation (m)                     | 53   | 50       | 13         | 42   | 104  | 5 |
| Slope (degrees)                   | 6    | 10       | 0          | 3    | 15   | 5 |
| Surface Organic Thickness (cm)    | 8.9  | 4.4      | 4.8        | 7.6  | 13.6 | 5 |
| Cumul. Org. Thickness (cm)        | 13.2 | 7.7      | 5.4        | 14.0 | 20.9 | 5 |
| Depth to >15% Rock Fragments (cm) | 48   |          | 48         | 48   | 48   | 1 |
| Water Table Depth (cm)            | -40  |          | -40        | -40  | -40  | 1 |
| Active Layer Thickness (cm)       | 58   | 35       | 37         | 43   | 91   | 4 |
| Site pH                           | 7.0  | 1.0      | 6.0        | 7.3  | 7.8  | 5 |
| Electrical Conductivity (uS/cm)   | 165  | 68       | 112        | 150  | 230  | 4 |
| Whole Tussock Cover (%)           | 1    | 3        | 0          | 0    | 4    | 4 |

Environmental data summaries for *Salix glauca*/*Dryas integrifolia*/*Rhytidium rugosum*.

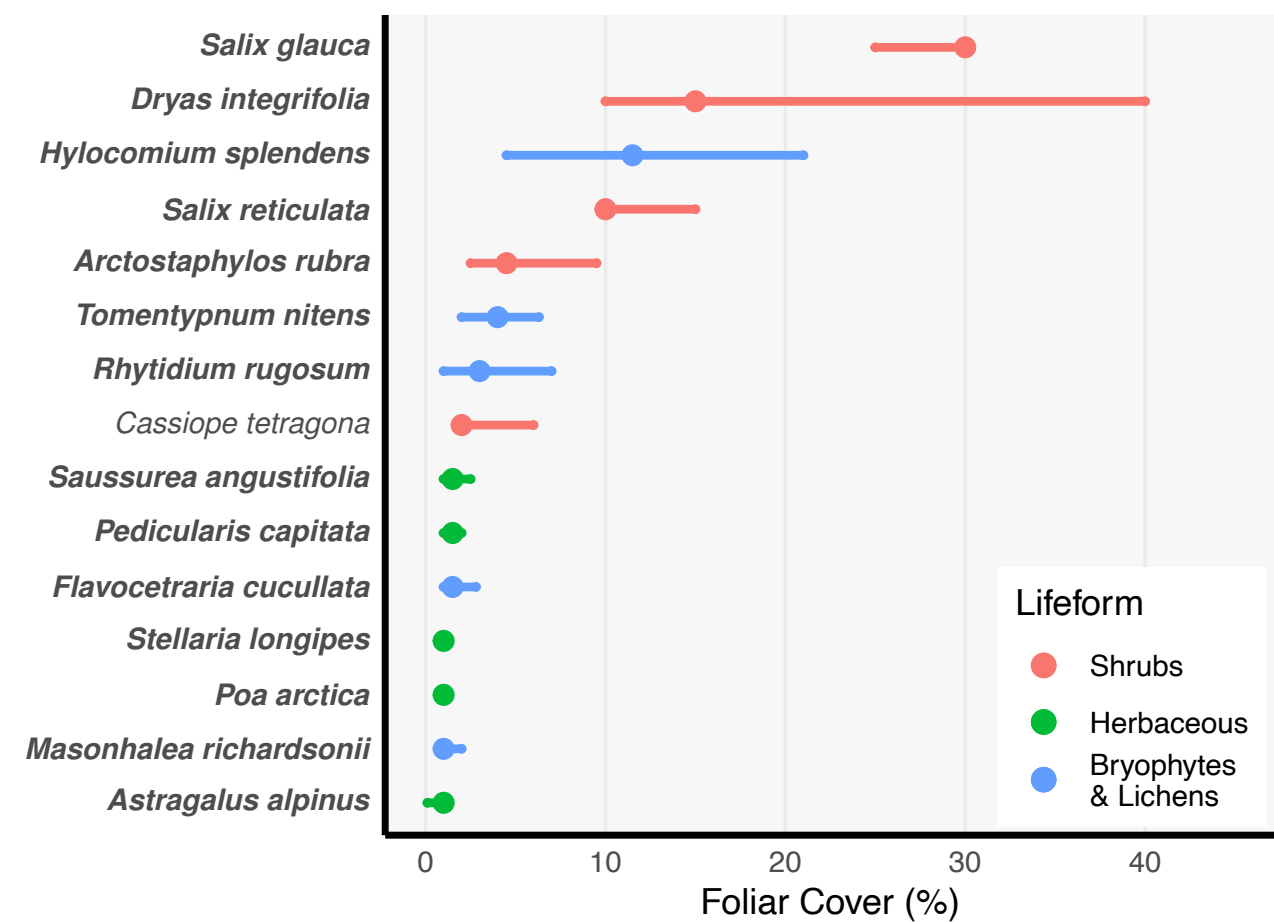

Median and 25th and 75th percentiles of foliar cover for the most common species in 3 lifeform groups in *Salix glauca*/*Dryas integrifolia*/*Rhytidium rugosum*. Latin names on y-axis in bold font occur in ≥70% of plots in this plant association.

| Lifeform         | Code   | USDA Scientific Name                           | Const. | Avg. | Std Dev. | Percentile |      |      |
|------------------|--------|------------------------------------------------|--------|------|----------|------------|------|------|
|                  |        |                                                |        |      |          | 10th       | 50th | 90th |
| Deciduous Shrubs | ARRU   | <i>Arctostaphylos rubra</i>                    | 80     | 7.5  | 8.6      | 1.6        | 4.5  | 15.8 |
| Deciduous Shrubs | BENA   | <i>Betula nana</i>                             | 40     | 3.0  | 0.0      | 3.0        | 3.0  | 3.0  |
| Deciduous Shrubs | SAGL   | <i>Salix glauca</i>                            | 100    | 29.0 | 10.8     | 19.0       | 30.0 | 39.0 |
| Deciduous Shrubs | SARE2  | <i>Salix reticulata</i>                        | 100    | 11.0 | 4.2      | 7.0        | 10.0 | 15.0 |
| Deciduous Shrubs | SARI4  | <i>Salix richardsonii</i>                      | 40     | 5.5  | 6.4      | 1.9        | 5.5  | 9.1  |
| Evergreen Shrubs | CATE11 | <i>Cassiope tetragona</i>                      | 60     | 4.7  | 4.6      | 2.0        | 2.0  | 8.4  |
| Evergreen Shrubs | DRIN4  | <i>Dryas integrifolia</i>                      | 100    | 22.0 | 16.8     | 7.0        | 15.0 | 40.0 |
| Forbs            | ANPA   | <i>Anemone parviflora</i>                      | 60     | 1.0  | 1.0      | 0.1        | 1.0  | 1.8  |
| Forbs            | ASAL7  | <i>Astragalus alpinus</i>                      | 80     | 1.0  | 0.5      | 0.1        | 1.0  | 1.0  |
| Forbs            | ASUM2  | <i>Astragalus umbellatus</i>                   | 40     | 3.0  | 2.8      | 1.4        | 3.0  | 4.6  |
| Forbs            | PECA2  | <i>Pedicularis capitata</i>                    | 80     | 1.3  | 0.9      | 0.1        | 1.5  | 2.0  |
| Forbs            | POBIP2 | <i>Polygonum bistorta</i> ssp. <i>plumosum</i> | 60     | 2.3  | 1.2      | 1.4        | 3.0  | 3.0  |
| Forbs            | PYSE   | <i>Pyrola secunda</i>                          | 60     | 1.3  | 0.6      | 1.0        | 1.0  | 1.8  |
| Forbs            | SAAN3  | <i>Saussurea angustifolia</i>                  | 80     | 2.0  | 1.4      | 1.0        | 1.5  | 3.4  |
| Forbs            | STLO2  | <i>Stellaria longipes</i>                      | 80     | 1.0  | 0.5      | 0.1        | 1.0  | 1.0  |
| Forbs            | VACA3  | <i>Valeriana capitata</i>                      | 60     | 1.4  | 1.5      | 0.1        | 1.0  | 2.6  |
| Grasses          | ARLA2  | <i>Arctagrostis latifolia</i>                  | 60     | 2.3  | 0.6      | 2.0        | 2.0  | 2.8  |
| Grasses          | POAR2  | <i>Poa arctica</i>                             | 80     | 1.0  | 0.0      | 1.0        | 1.0  | 1.0  |
| Sedges           | CASC10 | <i>Carex scirpoidea</i>                        | 60     | 1.0  | 1.0      | 0.1        | 1.0  | 1.8  |
| Mosses           | AUTU70 | <i>Aulacomnium turgidum</i>                    | 40     | 4.5  | 3.5      | 2.5        | 4.5  | 6.5  |
| Mosses           | DICRA8 | <i>Dicranum</i> sp.                            | 40     | 4.0  | 1.4      | 3.2        | 4.0  | 4.8  |
| Mosses           | HYSP70 | <i>Hylocomium splendens</i>                    | 80     | 14.0 | 12.6     | 3.6        | 11.5 | 26.4 |
| Mosses           | RHRU70 | <i>Rhytidium rugosum</i>                       | 100    | 4.4  | 4.0      | 1.0        | 3.0  | 8.8  |
| Mosses           | TONI70 | <i>Tomentypnum nitens</i>                      | 80     | 4.3  | 2.6      | 2.0        | 4.0  | 6.7  |
| Lichens          | DAAR60 | <i>Dactylina arctica</i>                       | 60     | 1.0  | 1.0      | 0.1        | 1.0  | 1.8  |
| Lichens          | FLCU   | <i>Flavocetraria cucullata</i>                 | 80     | 2.3  | 1.9      | 1.0        | 1.5  | 4.1  |
| Lichens          | MARI60 | <i>Masonhalea richardsonii</i>                 | 100    | 1.4  | 0.5      | 1.0        | 1.0  | 2.0  |
| Lichens          | PELT12 | <i>Peltigera</i> sp.                           | 60     | 1.0  | 0.5      | 0.1        | 1.0  | 1.0  |

Constancy and foliar cover data summaries for *Salix glauca*/*Dryas integrifolia*/*Rhytidium rugosum*. Constancy/cover summaries limited to taxa occurring in this plant association with a constancy ≥60 and average cover >0, or taxa with a constancy ≥40 and average cover ≥3.



**SALHAS–SALALA/EQUVAR: *Salix hastata*–*Salix alaxensis*/*Equisetum variegatum* (n = 4)**

A4363p: *Salix alaxensis* River Bar Alliance (proposed)

The plant association *Salix hastata*–*Salix alaxensis*/*Equisetum variegatum* occurs in Riverine physiography most commonly on the following geomorphic units: Braided Coarse Inactive Channel Deposit; Braided Coarse Active Channel Deposit; and Meander Active Overbank Deposit. The average elevation in this plant association is 189 m ( $\pm 94$  m), and the slope gradient is typically flat. This plant association was associated most commonly with the surface form Scour channels-ridges, but is also regularly associated with Nonpatterned and Riverbed Cobbles or Boulders. Soils are well drained, surface organics are typically absent, coarse fragments are common with an average top depth of 33 cm ( $\pm 29$  cm), dominant soil texture in the upper 40 cm is typically Gravelly or Loamy, and permafrost was never encountered in the upper 130 cm of the soil profile. Soil pH is typically alkaline, and the average electrical conductivity is 243  $\mu$ S/cm ( $\pm 119$   $\mu$ S/cm). The most common vegetation types include Open Low Willow and Open Tall Willow. The vegetation is co-dominated by *Salix hastata* and *Salix alaxensis*, and *Equisetum variegatum* is always present at low to moderate cover in the understory. Other plant taxa that commonly occur in this plant association at low abundance include, the shrubs *Salix reticulata*, *Salix glauca*, and *Arctostaphylos rubra*; the herbs *Eurybia sibirica*, *Parnassia kotzebuei*, *Anemone parviflora*, and *Bromus pumpellianus*; and the nonvasculars *Plagiomnium ellipticum*, *Brachythecium mildeanum*, *Abietinella abietina*, *Tomentypnum nitens*, and *Sanionia uncinata*.

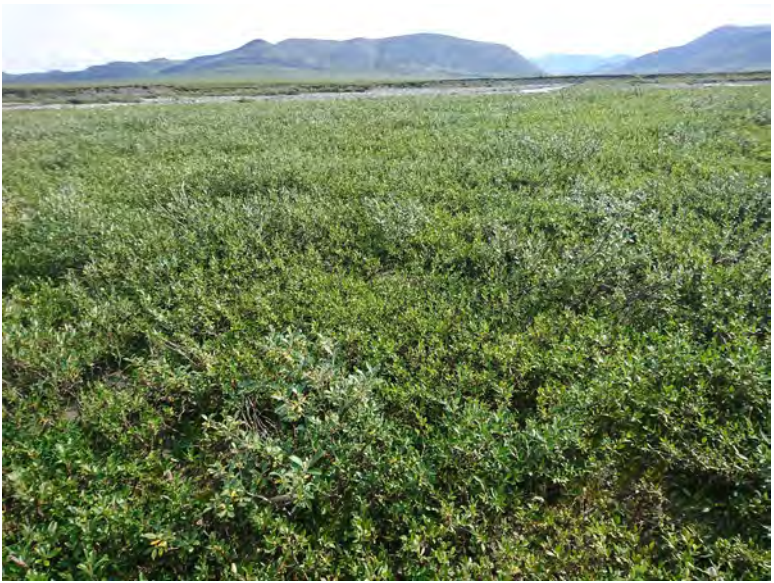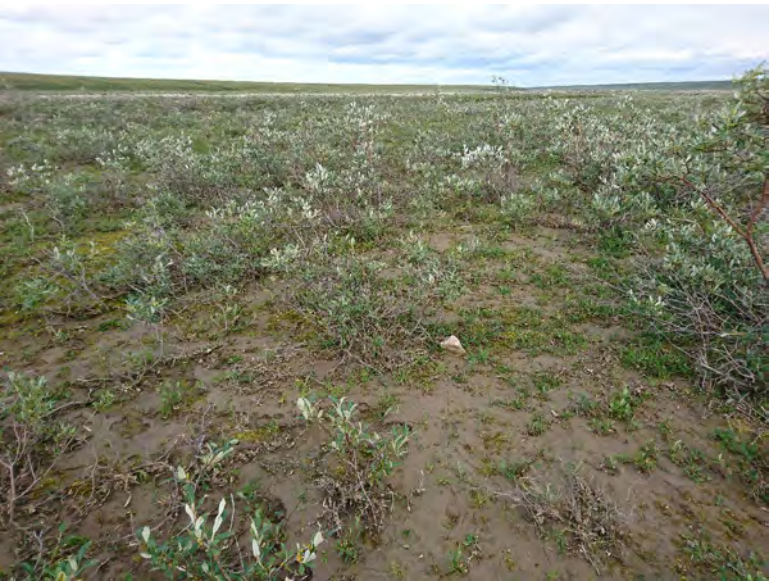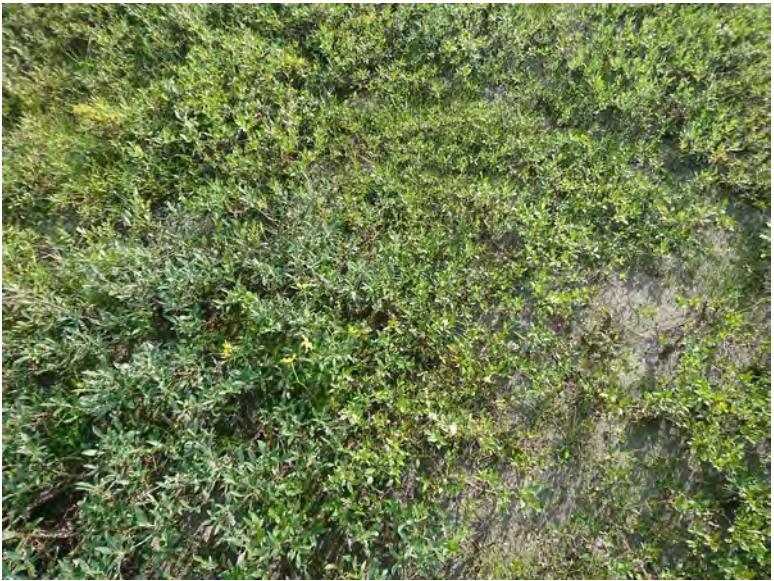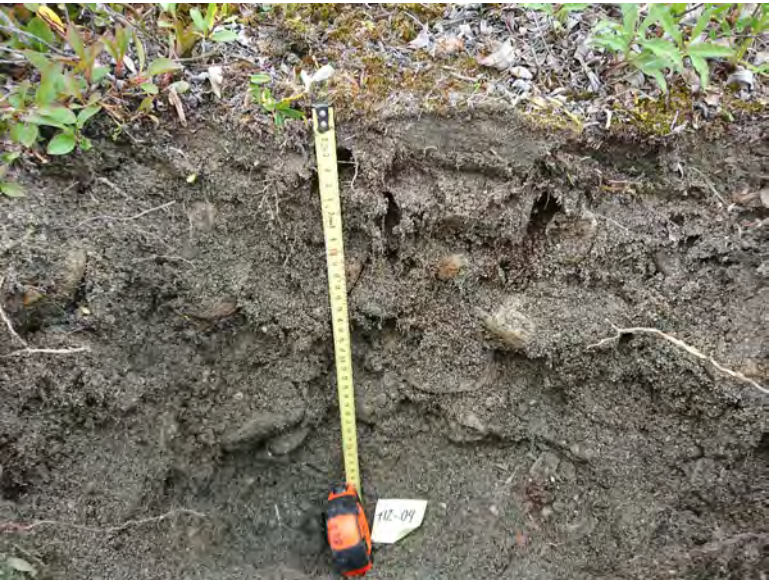

Representative photos (if available) for *Salix hastata*–*Salix alaxensis*/*Equisetum variegatum*. Top row: landscape photos, bottom row: ground photo (left), soil photo (right).

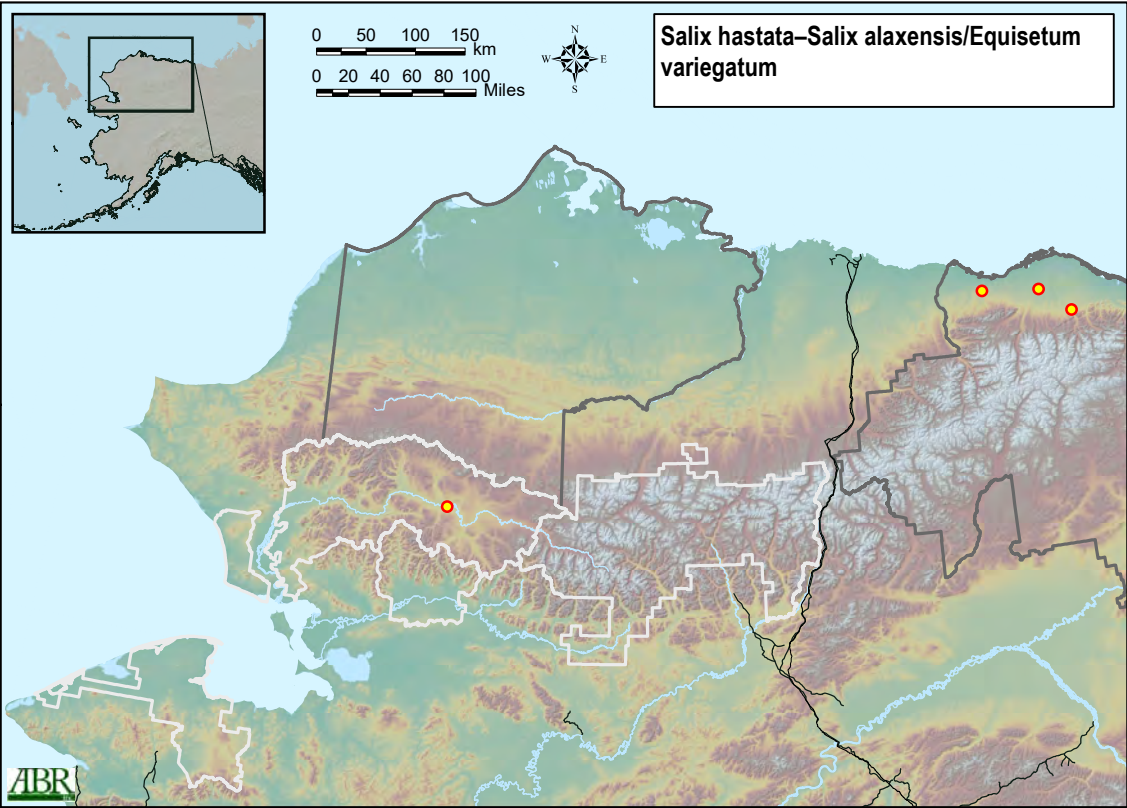

Distribution of *Salix hastata*–*Salix alaxensis*/*Equisetum variegatum* in the study area.



SALHAS–SALALA/EQUVAR: *Salix hastata*–*Salix alaxensis*/*Equisetum variegatum*, continued

|                                   | Avg. | Std Dev. | Percentile |      |      | n |
|-----------------------------------|------|----------|------------|------|------|---|
|                                   |      |          | 10th       | 50th | 90th |   |
| Elevation (m)                     | 189  | 94       | 106        | 184  | 276  | 4 |
| Slope (degrees)                   | 0    | 1        | 0          | 0    | 1    | 4 |
| Surface Organic Thickness (cm)    | 0.3  | 0.5      | 0.0        | 0.0  | 0.7  | 4 |
| Cumul. Org. Thickness (cm)        | 1.6  | 1.1      | 0.7        | 1.5  | 2.7  | 4 |
| Depth to >15% Rock Fragments (cm) | 33   | 29       | 8          | 27   | 61   | 4 |
| Water Table Depth (cm)            |      |          |            |      |      | 4 |
| Soil Thaw Depth (cm)              |      |          |            |      |      | 4 |
| Site pH                           | 7.6  | 0.4      | 7.3        | 7.6  | 8.0  | 4 |
| Electrical Conductivity (uS/cm)   | 243  | 119      | 139        | 240  | 348  | 4 |
| Whole Tussock Cover (%)           | 0    | 0        | 0          | 0    | 0    | 4 |

Environmental data summaries for *Salix hastata*–*Salix alaxensis*/*Equisetum variegatum*.

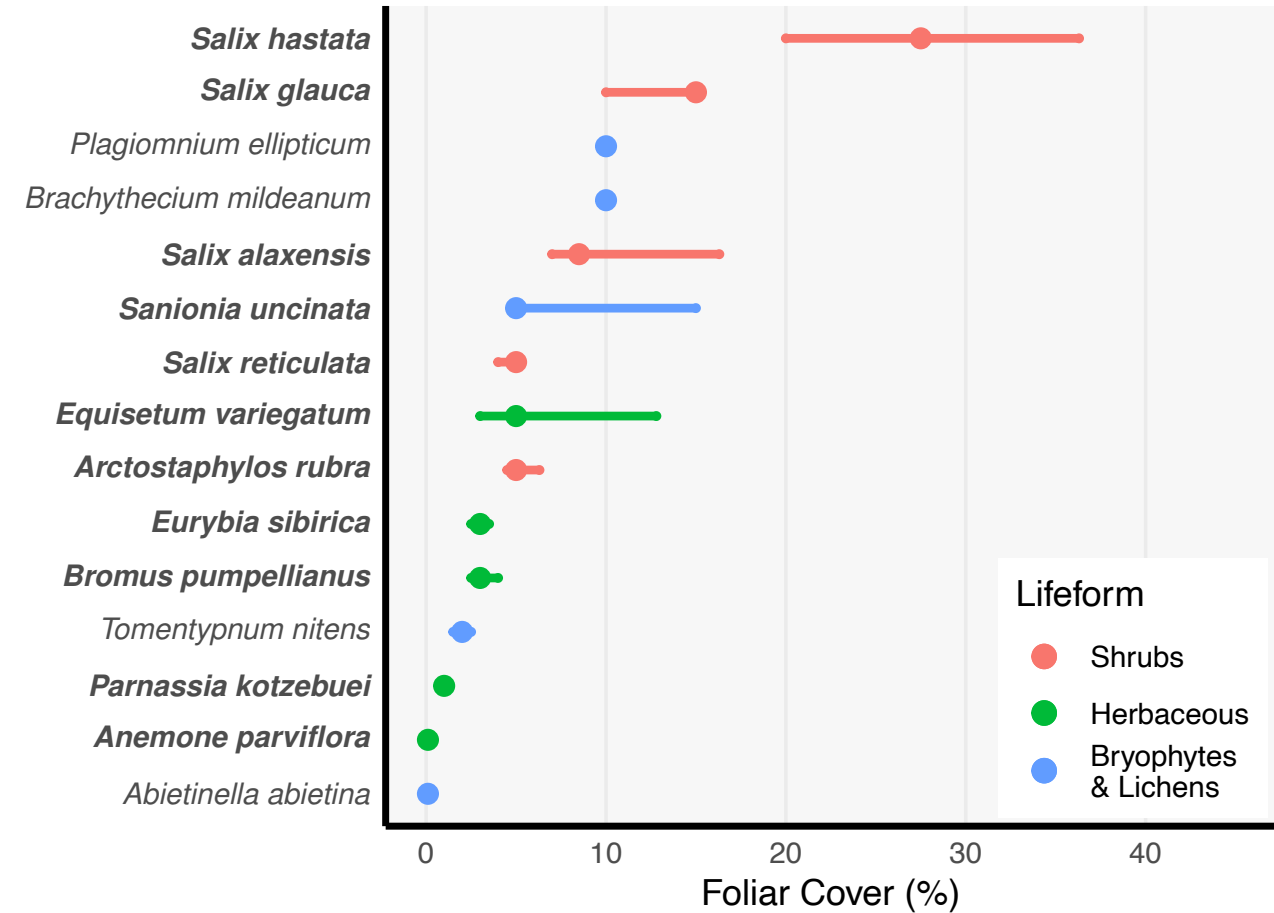

Median and 25th and 75th percentiles of foliar cover for the most common species in 3 lifeform groups in *Salix hastata*–*Salix alaxensis*/*Equisetum variegatum*. Latin names on y-axis in bold font occur in ≥70% of plots in this plant association.

| Lifeform         | Code   | USDA Scientific Name        | Const. | Avg. | Std Dev. | Percentile |      |      |
|------------------|--------|-----------------------------|--------|------|----------|------------|------|------|
|                  |        |                             |        |      |          | 10th       | 50th | 90th |
| Deciduous Shrubs | ARRU   | <i>Arctostaphylos rubra</i> | 100    | 5.8  | 3.0      | 3.6        | 5.0  | 8.5  |
| Deciduous Shrubs | SAAL   | <i>Salix alaxensis</i>      | 100    | 14.8 | 13.6     | 7.0        | 8.5  | 27.5 |
| Deciduous Shrubs | SAAR3  | <i>Salix arbusculoides</i>  | 50     | 5.5  | 6.4      | 1.9        | 5.5  | 9.1  |
| Deciduous Shrubs | SAGL   | <i>Salix glauca</i>         | 75     | 11.7 | 5.8      | 7.0        | 15.0 | 15.0 |
| Deciduous Shrubs | SAHA   | <i>Salix hastata</i>        | 100    | 28.8 | 10.3     | 20.0       | 27.5 | 38.5 |
| Deciduous Shrubs | SARE2  | <i>Salix reticulata</i>     | 75     | 4.3  | 1.2      | 3.4        | 5.0  | 5.0  |
| Deciduous Shrubs | SARI4  | <i>Salix richardsonii</i>   | 50     | 6.5  | 2.1      | 5.3        | 6.5  | 7.7  |
| Evergreen Shrubs | DRIN4  | <i>Dryas integrifolia</i>   | 50     | 5.0  | 2.8      | 3.4        | 5.0  | 6.6  |
| Forbs            | ANPA   | <i>Anemone parviflora</i>   | 100    | 0.1  | 0.5      | 0.1        | 0.1  | 1.0  |
| Forbs            | EUSI13 | <i>Eurybia sibirica</i>     | 100    | 3.0  | 1.6      | 1.6        | 3.0  | 4.4  |
| Forbs            | HEAL   | <i>Hedysarum alpinum</i>    | 50     | 6.0  | 1.4      | 5.2        | 6.0  | 6.8  |
| Forbs            | PAKO3  | <i>Parnassia kotzebuei</i>  | 100    | 1.0  | 0.5      | 0.1        | 1.0  | 1.0  |
| Ferns & Allies   | EQVA   | <i>Equisetum variegatum</i> | 100    | 10.8 | 13.0     | 3.0        | 5.0  | 23.1 |
| Grasses          | BRPU3  | <i>Bromus pumpellianus</i>  | 75     | 3.3  | 1.5      | 2.2        | 3.0  | 4.6  |
| Grasses          | FERU2  | <i>Festuca rubra</i>        | 75     | 3.0  | 2.0      | 1.4        | 3.0  | 4.6  |
| Sedges           | CAKR2  | <i>Carex krausei</i>        | 75     | 0.1  | 0.5      | 0.1        | 0.1  | 1.0  |
| Mosses           | SAUN8  | <i>Sanionia uncinata</i>    | 75     | 11.7 | 11.5     | 5.0        | 5.0  | 21.0 |

Constancy and foliar cover data summaries for *Salix hastata*–*Salix alaxensis*/*Equisetum variegatum*. Constancy/cover summaries limited to taxa occurring in this plant association with a constancy ≥60 and average cover >0, or taxa with a constancy ≥40 and average cover ≥3.



**SALNIP1–SALALA/ARCRUB1: *Salix niphoclada*–*Salix alaxensis*/*Arctous rubra* (n = 4)**

A4365p: *Salix alaxensis* - *Salix niphoclada* River Bar & Dune Alliance (proposed)

The plant association *Salix niphoclada*–*Salix alaxensis*/*Arctous rubra* occurs in Riverine and Upland physiography most commonly on the following geomorphic units: Meander Active Overbank Deposit; Braided Inactive Overbank Deposit; and Eolian Active Sand Dune. The average elevation in this plant association is 51 m ( $\pm 68$  m), and the slope gradient typically ranges between flat and nearly level. This plant association was associated most commonly with the surface forms Small dunes and Nonpatterned. Soils are well drained to somewhat excessively drained, surface organics are typically absent, coarse fragments are uncommon, but when they do occur the average top depth is 100 cm ( $\pm 141$  cm), dominant soil texture in the upper 40 cm is typically Sandy or Bouldery, and permafrost was common with an average active layer thickness of 140 cm ( $\pm 21$  cm). Soil pH is typically alkaline, and the average electrical conductivity is 35  $\mu$ S/cm ( $\pm 35$   $\mu$ S/cm). The most common vegetation types include Open Low Willow, Moist Sedge-Grass Meadow Tundra, and Open Tall Willow. The vegetation is co-dominated by *Salix niphoclada* and *Salix alaxensis*, and *Arctostaphylos rubra* is always present at low to moderate cover in the understory. Other plant taxa that commonly occur in this plant association at low abundance include, the shrubs *Salix glauca* and *Dryas integrifolia*; the herbs *Chamerion latifolium*, *Equisetum arvense*, *Eurybia sibirica*, *Equisetum variegatum*, and *Festuca rubra*; and the nonvasculars *Flavocetraria cucullata*, *Abietinella abietina*, *Ditrichum flexicaule*, *Bryum caespiticium*, and *Pohlia* sp.

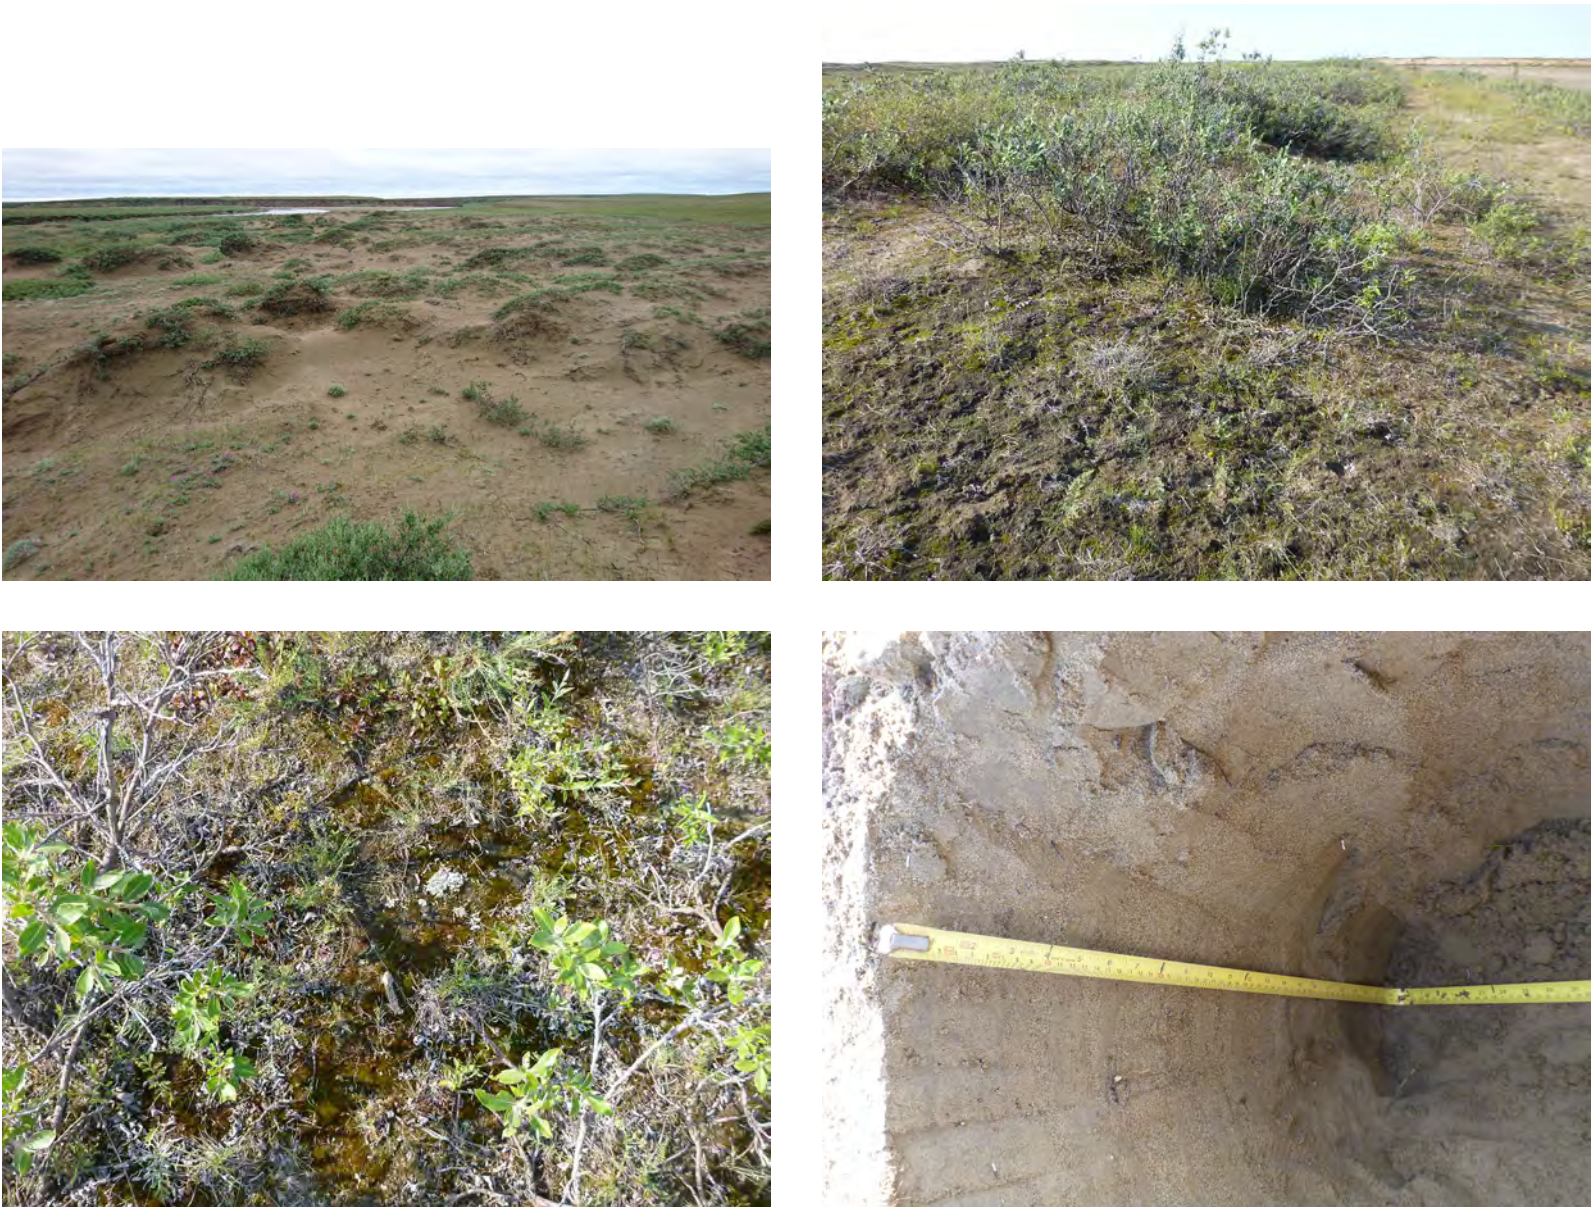

Representative photos (if available) for *Salix niphoclada*–*Salix alaxensis*/*Arctous rubra*. Top row: landscape photos, bottom row: ground photo (left), soil photo (right).

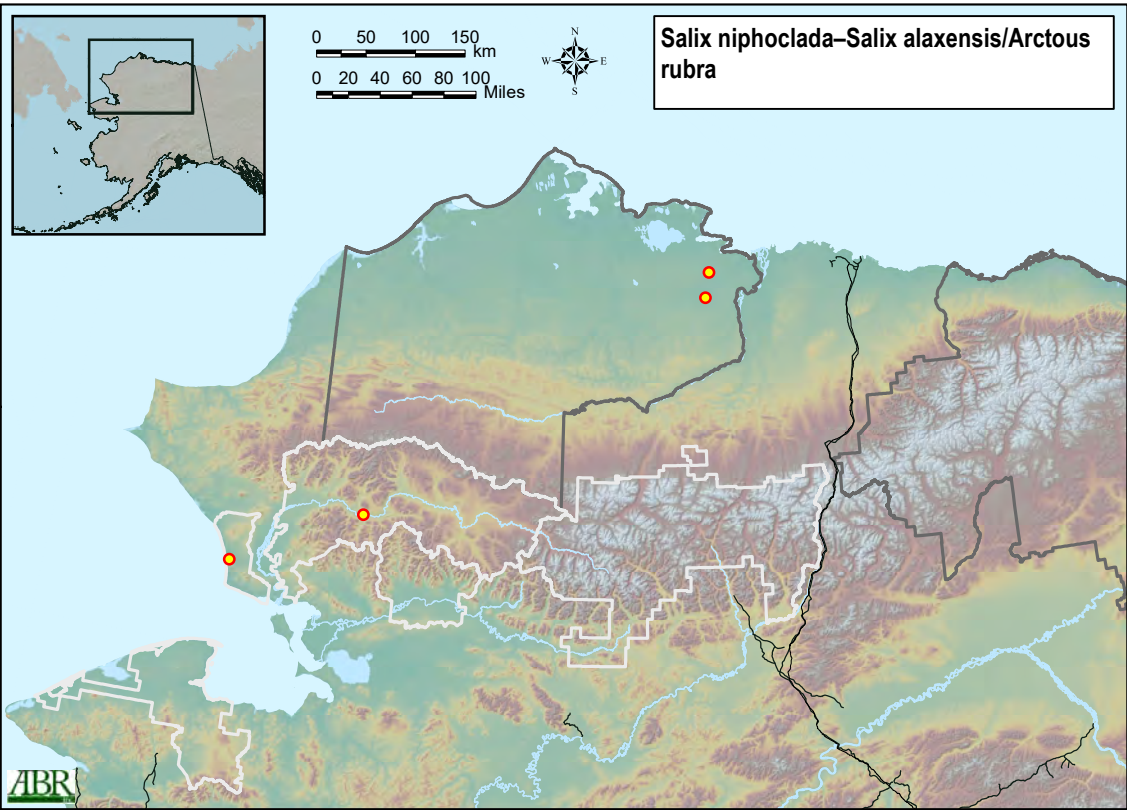

Distribution of *Salix niphoclada*–*Salix alaxensis*/*Arctous rubra* in the study area.



SALNIP1–SALALA/ARCRUB1: *Salix niphoclada*–*Salix alaxensis*/*Arctous rubra*, continued

|                                   | Avg. | Std Dev. | Percentile |      |      | n |
|-----------------------------------|------|----------|------------|------|------|---|
|                                   |      |          | 10th       | 50th | 90th |   |
| Elevation (m)                     | 51   | 68       | 9          | 22   | 115  | 4 |
| Slope (degrees)                   | 1    | 3        | 0          | 0    | 4    | 4 |
| Surface Organic Thickness (cm)    | 0.0  | 0.0      | 0.0        | 0.0  | 0.0  | 3 |
| Cumul. Org. Thickness (cm)        | 0.0  | 0.0      | 0.0        | 0.0  | 0.0  | 3 |
| Depth to >15% Rock Fragments (cm) | 100  | 141      | 20         | 100  | 180  | 2 |
| Water Table Depth (cm)            |      |          |            |      |      | 4 |
| Active Layer Thickness (cm)       | 140  | 21       | 128        | 140  | 152  | 2 |
| Site pH                           | 8.0  | 0.3      | 7.8        | 7.9  | 8.3  | 3 |
| Electrical Conductivity (uS/cm)   | 35   | 35       | 15         | 35   | 55   | 2 |
| Whole Tussock Cover (%)           | 0    | 0        | 0          | 0    | 0    | 4 |

Environmental data summaries for *Salix niphoclada*–*Salix alaxensis*/*Arctous rubra*.

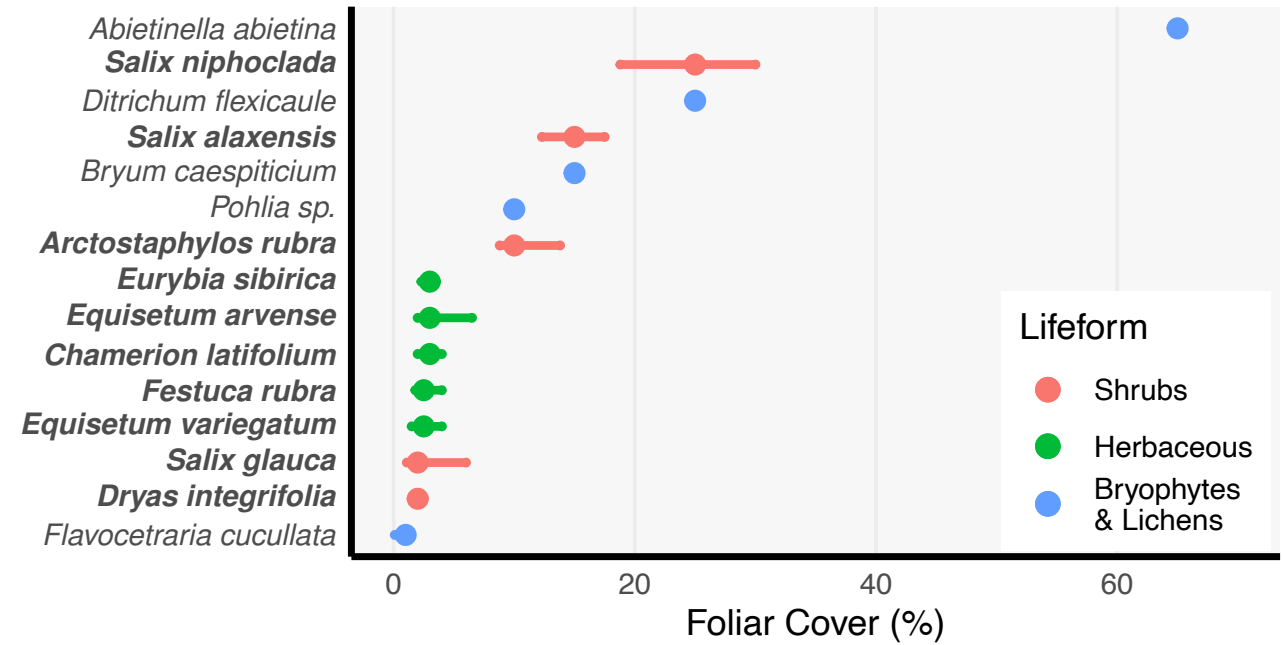

Median and 25th and 75th percentiles of foliar cover for the most common species in 3 lifeform groups in *Salix niphoclada*–*Salix alaxensis*/*Arctous rubra*. Latin names on y-axis in bold font occur in ≥70% of plots in this plant association.

| Lifeform         | Code   | USDA Scientific Name                                       | Const. | Percentile |          |                |
|------------------|--------|------------------------------------------------------------|--------|------------|----------|----------------|
|                  |        |                                                            |        | Avg.       | Std Dev. | 10th 50th 90th |
| Deciduous Shrubs | ARRU   | <i>Arctostaphylos rubra</i>                                | 100    | 12.5       | 8.7      | 6.5 10.0 20.5  |
| Deciduous Shrubs | DAFR6  | <i>Dasiphora fruticosa</i>                                 | 50     | 3.6        | 4.9      | 1.0 3.6 6.3    |
| Deciduous Shrubs | SAAL   | <i>Salix alaxensis</i>                                     | 100    | 14.8       | 8.6      | 7.3 15.0 22.0  |
| Deciduous Shrubs | SAGL   | <i>Salix glauca</i>                                        | 75     | 4.0        | 5.3      | 0.1 2.0 8.4    |
| Deciduous Shrubs | SANI10 | <i>Salix niphoclada</i>                                    | 100    | 23.8       | 7.5      | 16.5 25.0 30.0 |
| Evergreen Shrubs | DRIN4  | <i>Dryas integrifolia</i>                                  | 75     | 2.0        | 1.0      | 1.2 2.0 2.8    |
| Forbs            | ANPA   | <i>Anemone parviflora</i>                                  | 75     | 1.0        | 1.0      | 0.1 1.0 1.8    |
| Forbs            | ASAL7  | <i>Astragalus alpinus</i>                                  | 50     | 3.0        | 0.0      | 3.0 3.0 3.0    |
| Forbs            | CHLA13 | <i>Chamerion latifolium</i>                                | 75     | 3.0        | 2.0      | 1.4 3.0 4.6    |
| Forbs            | EUSI13 | <i>Eurybia sibirica</i>                                    | 100    | 2.8        | 2.0      | 1.0 3.0 4.4    |
| Forbs            | GABO2  | <i>Galium boreale</i>                                      | 50     | 4.0        | 4.2      | 1.6 4.0 6.4    |
| Forbs            | PAPA8  | <i>Parnassia palustris</i>                                 | 75     | 1.4        | 1.1      | 0.1 2.0 2.0    |
| Forbs            | TABIB  | <i>Tanacetum bipinnatum</i> ssp. <i>bipinnatum</i>         | 50     | 4.5        | 3.5      | 2.5 4.5 6.5    |
| Ferns & Allies   | EQAR   | <i>Equisetum arvense</i>                                   | 75     | 4.7        | 4.7      | 1.4 3.0 8.6    |
| Ferns & Allies   | EQVA   | <i>Equisetum variegatum</i>                                | 100    | 3.0        | 2.9      | 1.0 2.5 5.8    |
| Grasses          | n/a    | <i>Calamagrostis purpurascens</i> ssp. <i>purpurascens</i> | 50     | 3.0        | 2.8      | 1.4 3.0 4.6    |
| Grasses          | FERU2  | <i>Festuca rubra</i>                                       | 100    | 3.3        | 2.6      | 1.3 2.5 5.8    |
| Grasses          | KOAS   | <i>Koeleria asiatica</i>                                   | 50     | 3.5        | 2.1      | 2.3 3.5 4.7    |

Constancy and foliar cover data summaries for *Salix niphoclada*–*Salix alaxensis*/*Arctous rubra*. Constancy/cover summaries limited to taxa occurring in this plant association with a constancy ≥60 and average cover >0, or taxa with a constancy ≥40 and average cover ≥3.



**SALPUL1/CARAU1-ERIAN1: *Salix pulchra*/*Carex aquatilis*-*Eriophorum angustifolium* (n = 4)**

The plant association *Salix pulchra*/*Carex aquatilis*-*Eriophorum angustifolium* occurs in Low-land physiography most commonly on the following geomorphic units: Channel Fen; Delta Thaw Basin, ice-rich; and Emerged Estuarine Marine Deposit. The average elevation in this plant association is 33 m ( $\pm 66$  m), and the slope gradient is typically flat. This plant association was associated most commonly with the surface form High-centered, Low-relief Polygons, but is also regularly associated with Nonpatterned and Water tracks (non-incised drainages). Soils are flooded to very poorly drained, surface organic thickness typically ranges from thin to moderately thick, coarse fragments are absent, and permafrost was common with an average active layer thickness of 44 cm ( $\pm 9$  cm). Water pH is typically circumacidic, and the average electrical conductivity is 425  $\mu\text{S}/\text{cm}$  ( $\pm 390$   $\mu\text{S}/\text{cm}$ ). The most common vegetation types include Open Low Willow and Open Low Willow-Sedge Shrub Tundra. The vegetation is dominated by *Salix pulchra*, which typically forms an open low shrub canopy, and *Carex aquatilis* and *Eriophorum angustifolium* co-dominate in the herbaceous layer. Other plant taxa that commonly occur in this plant association at low abundance include, the shrubs *Salix arctica*, *Dryas integrifolia*, *Salix reticulata*, and *Salix glauca*; the herbs *Carex bigelowii*, *Eriophorum vaginatum*, and *Poa arctica*; and the nonvasculars *Aulacomnium palustre*, *Polytrichum* sp., *Tomentypnum nitens*, *Sphagnum tundrae*, and *Hylocomium splendens*. The soils in this plant association range from wet to flooded, and dwarf shrubs are generally limited to moist micro-highs.

A4366p: Arctic Ombrotrophic Wet Low Shrublands (proposed)

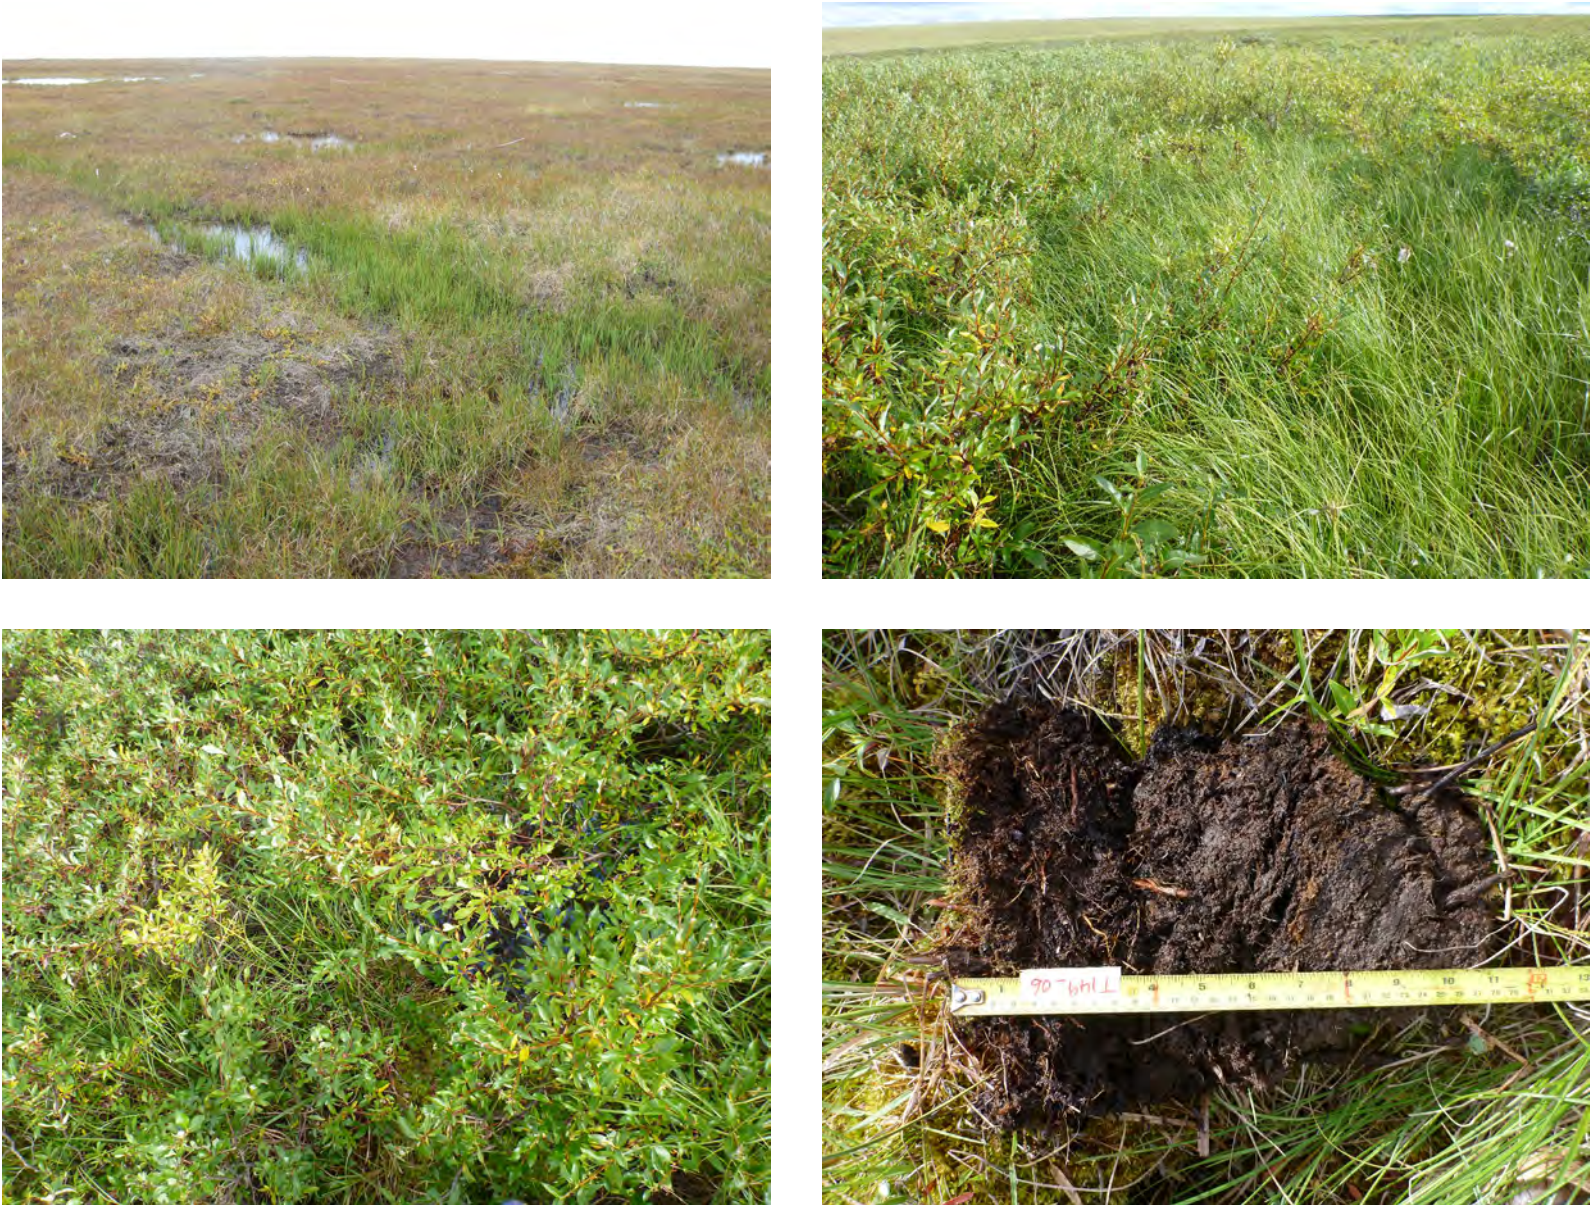

Representative photos (if available) for *Salix pulchra*/*Carex aquatilis*-*Eriophorum angustifolium*. Top row: landscape photos, bottom row: ground photo (left), soil photo (right).

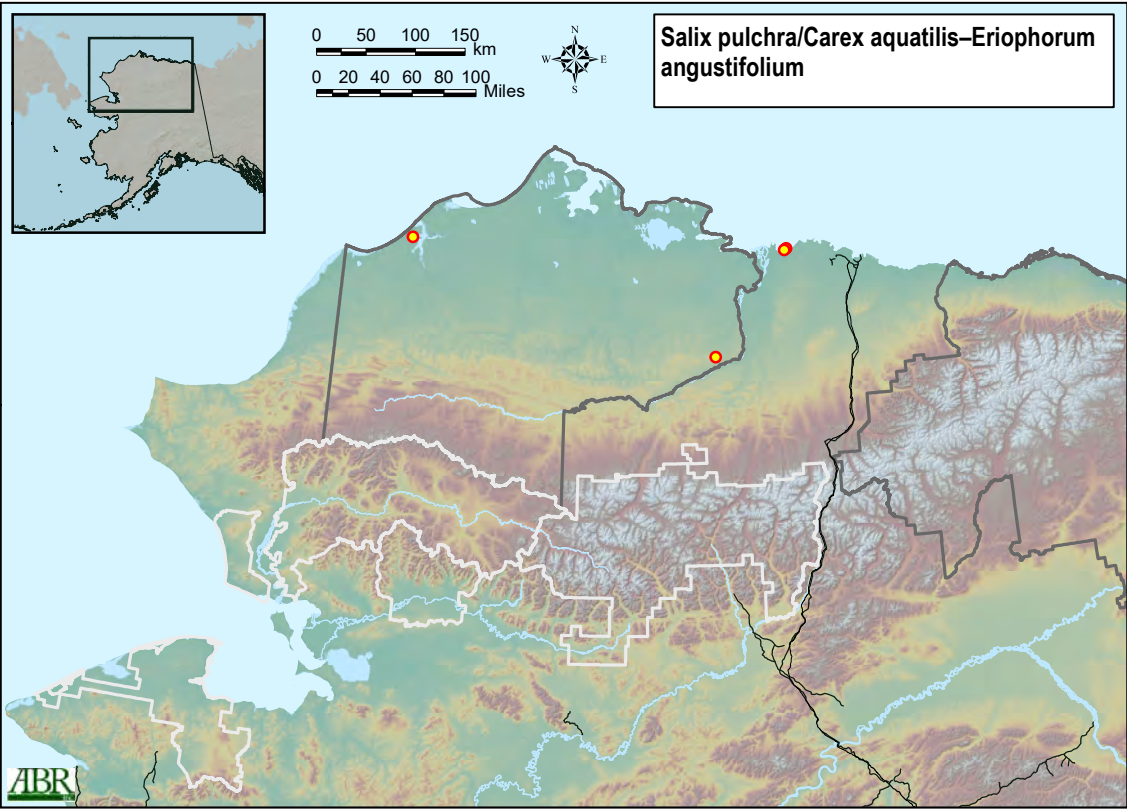

Distribution of *Salix pulchra*/*Carex aquatilis*-*Eriophorum angustifolium* in the study area.



SALPUL1/CARAQU1–ERIAN1: *Salix pulchra*/*Carex aquatilis*–*Eriophorum angustifolium*, continued

|                                   | Avg. | Std Dev. | Percentile |      |      | n |
|-----------------------------------|------|----------|------------|------|------|---|
|                                   |      |          | 10th       | 50th | 90th |   |
| Elevation (m)                     | 33   | 66       | -4         | 3    | 94   | 4 |
| Slope (degrees)                   | 0    | 0        | 0          | 0    | 0    | 4 |
| Surface Organic Thickness (cm)    | 25.3 | 14.3     | 12.6       | 24.5 | 38.5 | 4 |
| Cumul. Org. Thickness (cm)        | 28.0 | 11.7     | 16.7       | 29.0 | 38.5 | 4 |
| Depth to >15% Rock Fragments (cm) |      |          |            |      |      | 4 |
| Water Table Depth (cm)            | -7   | 8        | -13        | -8   | 1    | 4 |
| Active Layer Thickness (cm)       | 44   | 9        | 35         | 46   | 51   | 4 |
| Site pH                           | 6.4  | 0.3      | 6.2        | 6.4  | 6.7  | 4 |
| Electrical Conductivity (uS/cm)   | 425  | 390      | 118        | 325  | 812  | 4 |
| Whole Tussock Cover (%)           | 0    | 0        | 0          | 0    | 1    | 4 |

Environmental data summaries for *Salix pulchra*/*Carex aquatilis*–*Eriophorum angustifolium*.

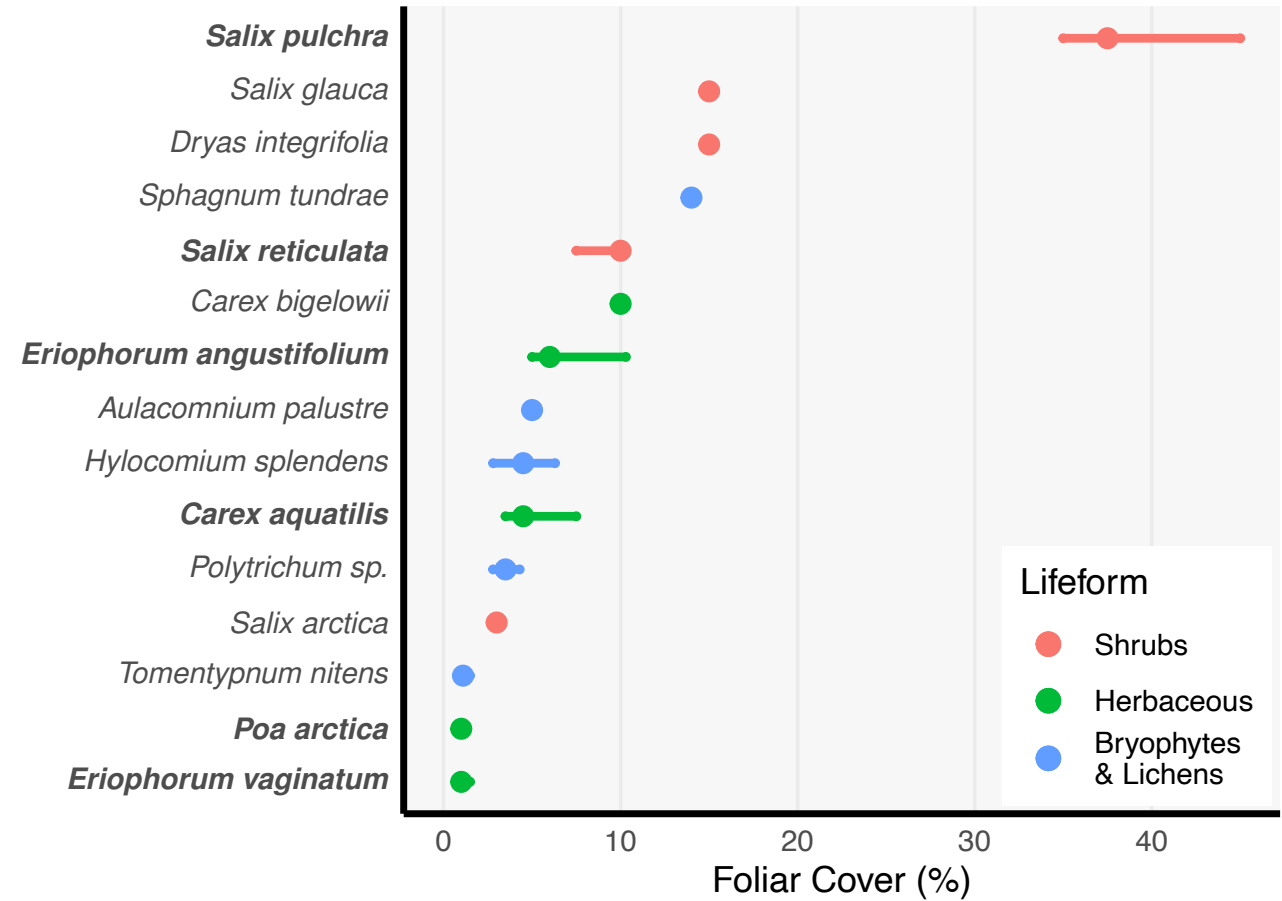

Median and 25th and 75th percentiles of foliar cover for the most common species in 3 lifeform groups in *Salix pulchra*/*Carex aquatilis*–*Eriophorum angustifolium*. Latin names on y-axis in bold font occur in ≥70% of plots in this plant association.

| Lifeform         | Code   | USDA Scientific Name            | Const. | Avg. | Std Dev. | Percentile |      |      |
|------------------|--------|---------------------------------|--------|------|----------|------------|------|------|
|                  |        |                                 |        |      |          | 10th       | 50th | 90th |
| Deciduous Shrubs | SAPU15 | <i>Salix pulchra</i>            | 100    | 42.5 | 11.9     | 35.0       | 37.5 | 54.0 |
| Deciduous Shrubs | SARE2  | <i>Salix reticulata</i>         | 75     | 8.3  | 2.9      | 6.0        | 10.0 | 10.0 |
| Grasses          | POAR2  | <i>Poa arctica</i>              | 75     | 1.0  | 0.5      | 0.1        | 1.0  | 1.0  |
| Sedges           | CAAQ   | <i>Carex aquatilis</i>          | 100    | 6.5  | 5.8      | 2.6        | 4.5  | 12.0 |
| Sedges           | CABI5  | <i>Carex bigelowii</i>          | 50     | 10.0 | 0.0      | 10.0       | 10.0 | 10.0 |
| Sedges           | CAME4  | <i>Carex membranacea</i>        | 50     | 8.5  | 9.2      | 3.3        | 8.5  | 13.7 |
| Sedges           | ERAN6  | <i>Eriophorum angustifolium</i> | 100    | 9.3  | 7.2      | 5.0        | 6.0  | 16.1 |
| Sedges           | ERVA4  | <i>Eriophorum vaginatum</i>     | 75     | 1.3  | 0.6      | 1.0        | 1.0  | 1.8  |
| Mosses           | HYSP70 | <i>Hylocomium splendens</i>     | 50     | 4.5  | 4.9      | 1.7        | 4.5  | 7.3  |
| Mosses           | POLYT5 | <i>Polytrichum sp.</i>          | 50     | 3.5  | 2.1      | 2.3        | 3.5  | 4.7  |

Constancy and foliar cover data summaries for *Salix pulchra*/*Carex aquatilis*–*Eriophorum angustifolium*. Constancy/cover summaries limited to taxa occurring in this plant association with a constancy ≥60 and average cover >0, or taxa with a constancy ≥40 and average cover ≥3.



**SALPUL1/CARAQU1-ERIANG1/SPHAG: *Salix pulchra*/*Carex aquatilis*-*Eriophorum angustifolium*/*Sphagnum* (n = 10)**

A4366p: Arctic Ombrotrophic Wet Low Shrublands (proposed)

The plant association *Salix pulchra*/*Carex aquatilis*-*Eriophorum angustifolium*/*Sphagnum* occurs in Lacustrine and Lowland physiography most commonly on the following geomorphic units: Lowland Retransported Deposit; Hillside Colluvium; and Lacustrine Deposit. The average elevation in this plant association is 273 m ( $\pm 329$  m), and the slope gradient typically ranges between flat and gently sloping. This plant association was associated most commonly with the surface form Nonpatterned, but is also regularly associated with Water tracks (non-incised drainages); Low-centered, Low-relief, High-density Polygons; and Undifferentiated mounds. Soils are very poorly drained to poorly drained, surface organic thickness typically ranges from thin to moderately thick, coarse fragments are uncommon, but when they do occur the average top depth is 32 cm ( $\pm 12$  cm), and permafrost was common with an average active layer thickness of 40 cm ( $\pm 19$  cm). Water pH typically ranges from acidic to circumacidic, and the average electrical conductivity is 175  $\mu$ S/cm ( $\pm 244$   $\mu$ S/cm). The most common vegetation types include Open Low Willow-Sedge Shrub Tundra, Open Low Willow, and Closed Low Willow. The vegetation is dominated by *Salix pulchra*, which typically forms an open low shrub canopy, and *Carex aquatilis* and *Eriophorum angustifolium* co-dominate in the herbaceous layer. *Sphagnum* is always present at moderate to high cover. Other plant taxa that commonly occur in this plant association at low abundance include, the shrubs *Ledum palustre* ssp. *decumbens*, *Vaccinium uliginosum*, *Salix fuscescens*, and *Betula nana*; the herbs *Rubus chamaemorus*, *Petasites frigidus*, and *Potentilla palustris*; and the nonvasculars *Aulacomnium turgidum*, *Tomentypnum nitens*, *Aulacomnium palustre*, *Sphagnum squarrosum*, and *Hylocomium splendens*. The soils in this plant association range from wet to flooded, and dwarf shrubs, with the exception of *Salix fuscescens*, are generally limited to moist micro-highs.

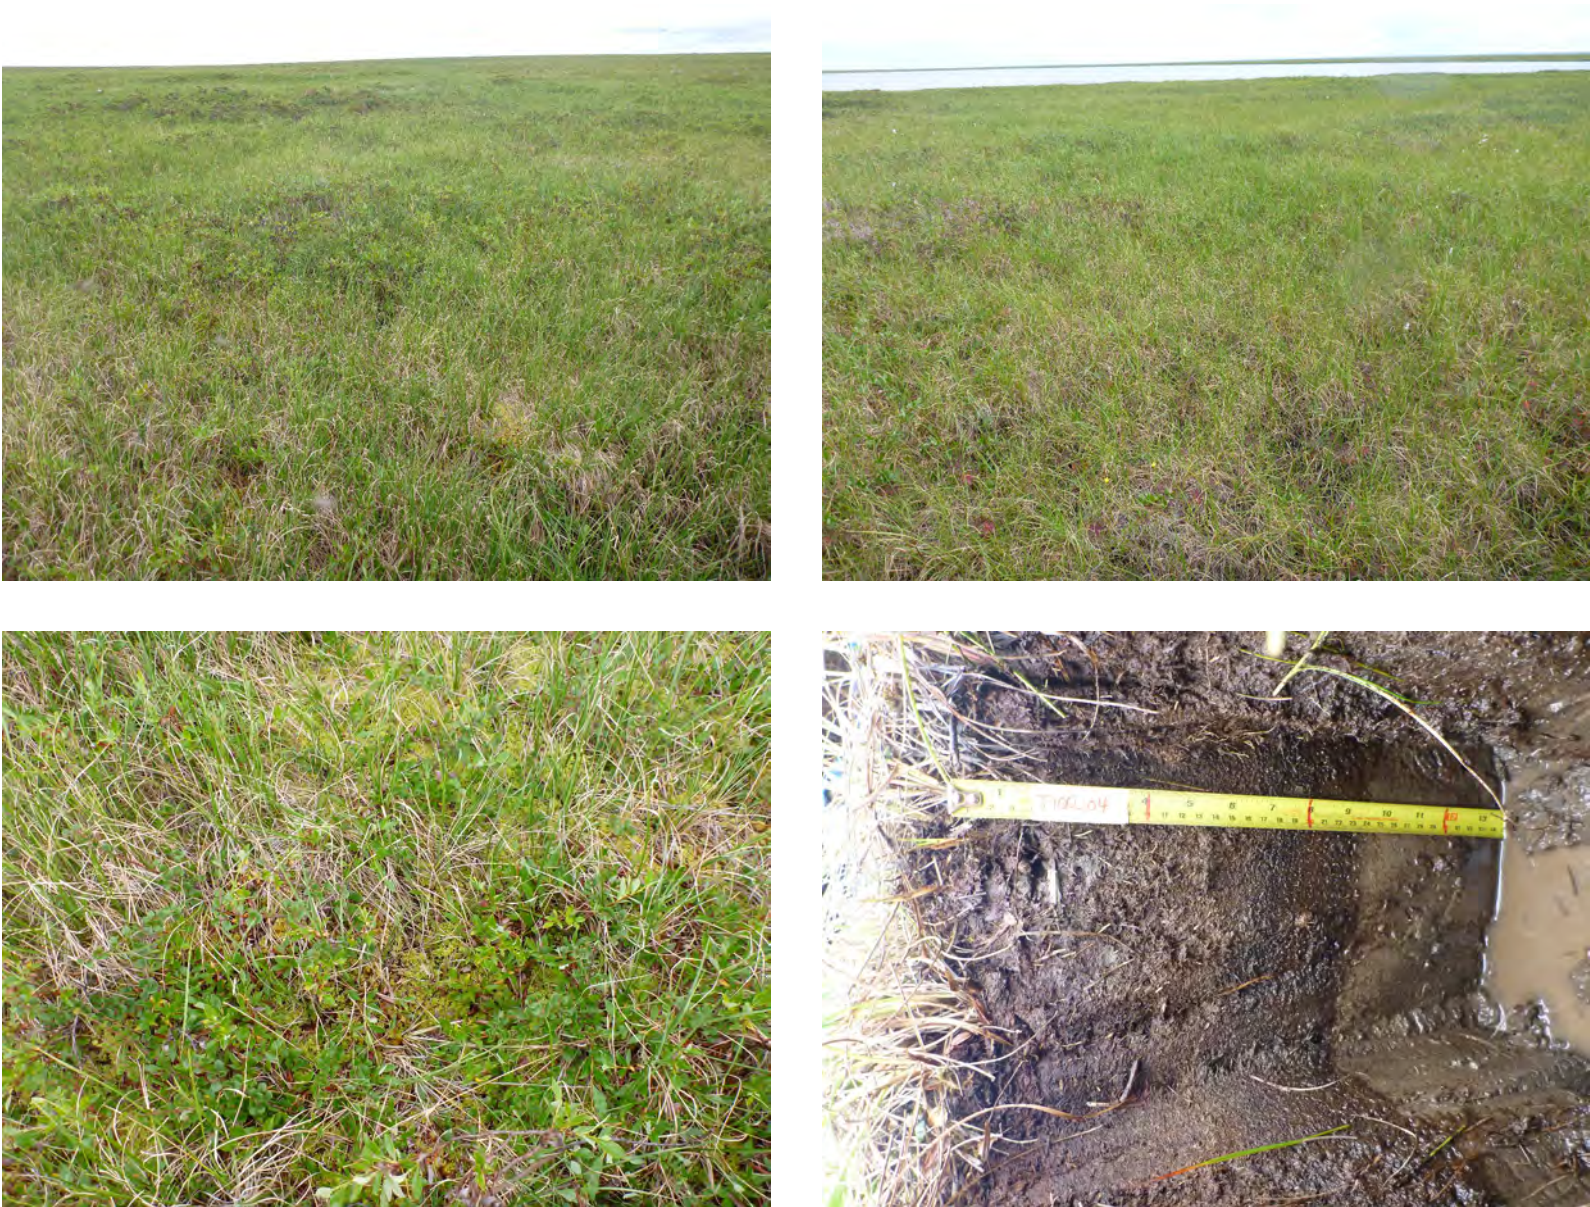

Representative photos (if available) for *Salix pulchra*/*Carex aquatilis*-*Eriophorum angustifolium*/*Sphagnum*. Top row: landscape photos, bottom row: ground photo (left), soil photo (right).

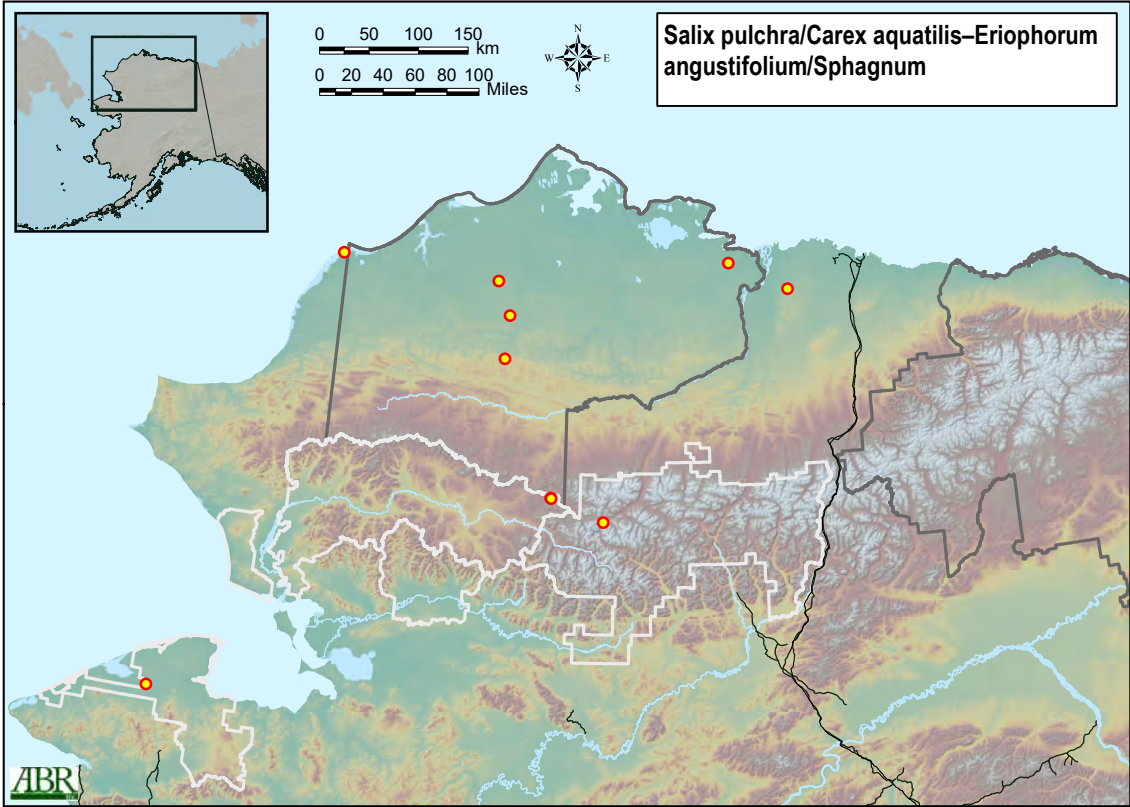

Distribution of *Salix pulchra*/*Carex aquatilis*-*Eriophorum angustifolium*/*Sphagnum* in the study area.



SALPUL1/CARAQU1-ERIANG1/SPHAG: *Salix pulchra*/*Carex aquatilis*-*Eriophorum angustifolium*/*Sphagnum*, continued

|                                   | Avg. | Std Dev. | Percentile |      |      | n  |
|-----------------------------------|------|----------|------------|------|------|----|
|                                   |      |          | 10th       | 50th | 90th |    |
| Elevation (m)                     | 273  | 329      | 6          | 84   | 675  | 10 |
| Slope (degrees)                   | 2    | 2        | 0          | 2    | 4    | 10 |
| Surface Organic Thickness (cm)    | 20.5 | 10.2     | 5.9        | 22.5 | 30.3 | 10 |
| Cumul. Org. Thickness (cm)        | 20.6 | 10.0     | 6.8        | 22.5 | 30.3 | 10 |
| Depth to >15% Rock Fragments (cm) | 32   | 12       | 21         | 35   | 41   | 3  |
| Water Table Depth (cm)            | -11  | 14       | -31        | -4   | 0    | 8  |
| Active Layer Thickness (cm)       | 40   | 19       | 26         | 36   | 55   | 8  |
| Site pH                           | 5.6  | 0.6      | 4.8        | 5.7  | 6.1  | 10 |
| Electrical Conductivity (uS/cm)   | 175  | 244      | 28         | 85   | 379  | 10 |
| Whole Tussock Cover (%)           | 0    | 0        | 0          | 0    | 0    | 9  |

Environmental data summaries for *Salix pulchra*/*Carex aquatilis*-*Eriophorum angustifolium*/*Sphagnum*.

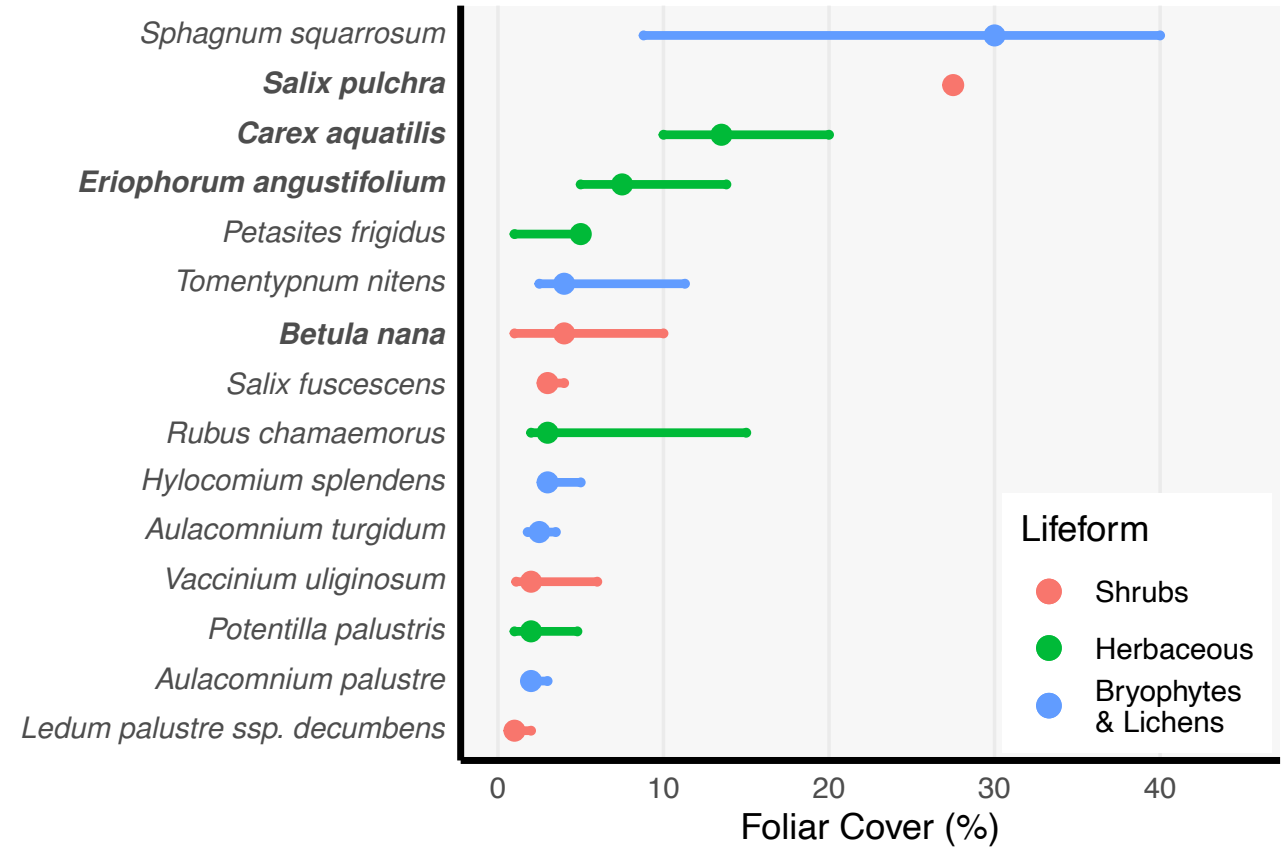

Median and 25th and 75th percentiles of foliar cover for the most common species in 3 lifeform groups in *Salix pulchra*/*Carex aquatilis*-*Eriophorum angustifolium*/*Sphagnum*. Latin names on y-axis in bold font occur in ≥70% of plots in this plant association.

| Lifeform         | Code   | USDA Scientific Name            | Const. | Avg. | Std Dev. | Percentile |      |      |
|------------------|--------|---------------------------------|--------|------|----------|------------|------|------|
|                  |        |                                 |        |      |          | 10th       | 50th | 90th |
| Deciduous Shrubs | BENA   | <i>Betula nana</i>              | 80     | 5.0  | 4.4      | 1.0        | 4.0  | 10.0 |
| Deciduous Shrubs | SAFU   | <i>Salix fuscescens</i>         | 40     | 3.8  | 2.2      | 2.3        | 3.0  | 5.8  |
| Deciduous Shrubs | SAPU15 | <i>Salix pulchra</i>            | 100    | 38.3 | 21.0     | 20.0       | 27.5 | 73.2 |
| Forbs            | PEFR5  | <i>Petasites frigidus</i>       | 50     | 4.0  | 3.0      | 1.0        | 5.0  | 6.8  |
| Forbs            | POPA14 | <i>Potentilla palustris</i>     | 40     | 3.5  | 4.5      | 0.1        | 2.0  | 7.9  |
| Forbs            | RUCH   | <i>Rubus chamaemorus</i>        | 50     | 9.2  | 10.5     | 1.4        | 3.0  | 21.0 |
| Sedges           | CAAQ   | <i>Carex aquatilis</i>          | 100    | 15.7 | 10.3     | 5.0        | 13.5 | 22.0 |
| Sedges           | ERAN6  | <i>Eriophorum angustifolium</i> | 100    | 10.0 | 6.2      | 5.0        | 7.5  | 20.0 |
| Mosses           | HYSP70 | <i>Hylocomium splendens</i>     | 50     | 4.4  | 3.4      | 1.8        | 3.0  | 8.0  |
| Mosses           | SPSQ70 | <i>Sphagnum squarrosum</i>      | 60     | 28.0 | 22.5     | 4.0        | 30.0 | 50.0 |
| Mosses           | TONI70 | <i>Tomentypnum nitens</i>       | 40     | 9.8  | 13.6     | 1.6        | 4.0  | 22.5 |

Constancy and foliar cover data summaries for *Salix pulchra*/*Carex aquatilis*-*Eriophorum angustifolium*/*Sphagnum*. Constancy/cover summaries limited to taxa occurring in this plant association with a constancy ≥60 and average cover >0, or taxa with a constancy ≥40 and average cover ≥3.



**SALPUL1/CARAQU1-ERIANG1-SAXHIR: *Salix pulchra*/*Carex aquatilis*-*Eriophorum angustifolium*-*Saxifraga hirculus* (n = 9)**

A4366p: Arctic Ombrotrophic Wet Low Shrublands (proposed)

The plant association *Salix pulchra*/*Carex aquatilis*-*Eriophorum angustifolium*-*Saxifraga hirculus* occurs in Lacustrine, Lowland, and Riverine physiography most commonly on the following geomorphic units: Delta Inactive Overbank Deposit; Drained Lake Basin, ice-poor margin; and Drained Lake Basin, ice-rich margin. The average elevation in this plant association is 29m ( $\pm 26$ m), and the slope gradient typically ranges between flat and nearly level. This plant association was associated most commonly with the surface form Nonpatterned, but is also regularly associated with Low-centered, Low-relief, Low-density Polygons; Undifferentiated mounds; and Water tracks (non-incised drainages). Soils are very poorly drained to poorly drained, surface organic thickness is typically moderately thick, coarse fragments are absent, and permafrost was common with an average active layer thickness of 41 cm ( $\pm 12$  cm). Water pH typically ranges from circumacidic to circumalkaline, and the average electrical conductivity is 344  $\mu$ S/cm ( $\pm 348$   $\mu$ S/cm). The most common vegetation types include Open Low Willow-Sedge Shrub Tundra and Open Low Willow. The vegetation is dominated by *Salix pulchra*, which typically forms an open low shrub canopy, and *Carex aquatilis* and *Eriophorum angustifolium* co-dominate in the herbaceous layer. *Saxifraga hirculus* is always present at low cover. Other plant taxa that commonly occur in this plant association at low abundance include, the shrubs *Salix richardsonii*, *Salix reticulata*, *Betula nana*, and *Dryas integrifolia*; the herbs *Polygonum viviparum* and *Potentilla palustris*; and the nonvasculars *Drepanocladus* sp., *Limprichtia revolvens*, *Hylocomium splendens*, *Aulacomnium palustre*, and *Tomentypnum nitens*. The soils in this plant association range from wet to flooded, and dwarf shrubs are generally limited to moist micro-highs.

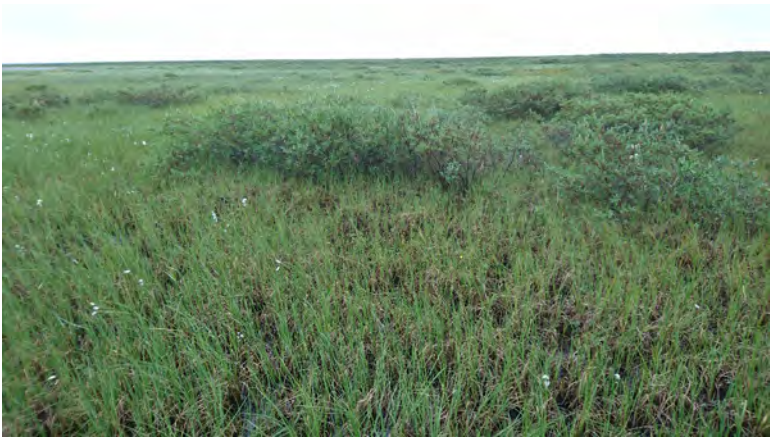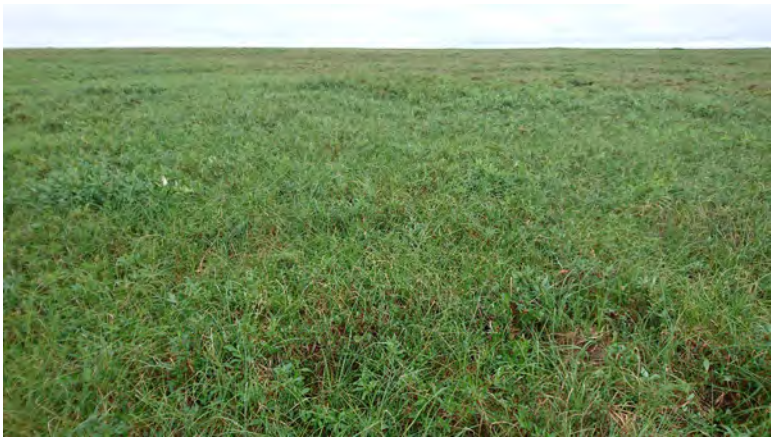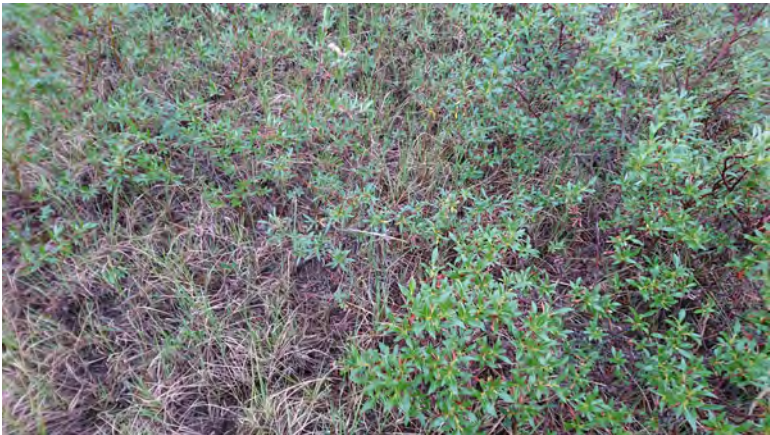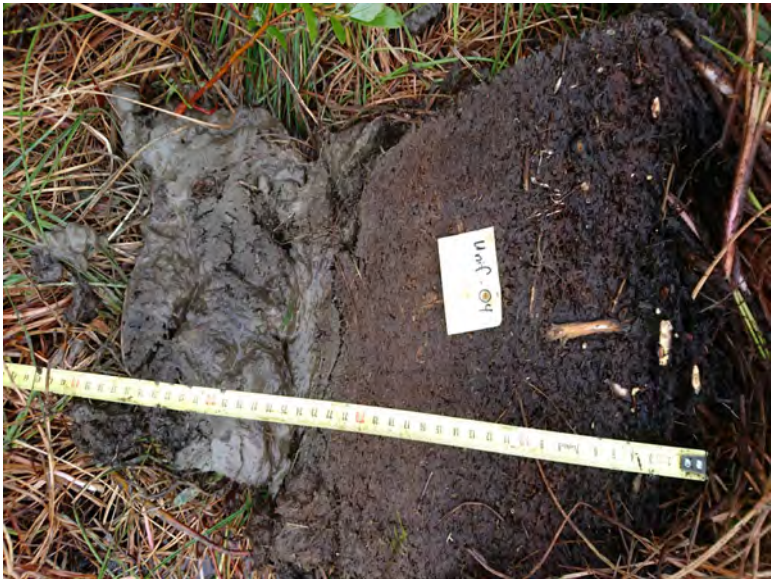

Representative photos (if available) for *Salix pulchra*/*Carex aquatilis*-*Eriophorum angustifolium*-*Saxifraga hirculus*.  
Top row: landscape photos, bottom row: ground photo (left), soil photo (right).

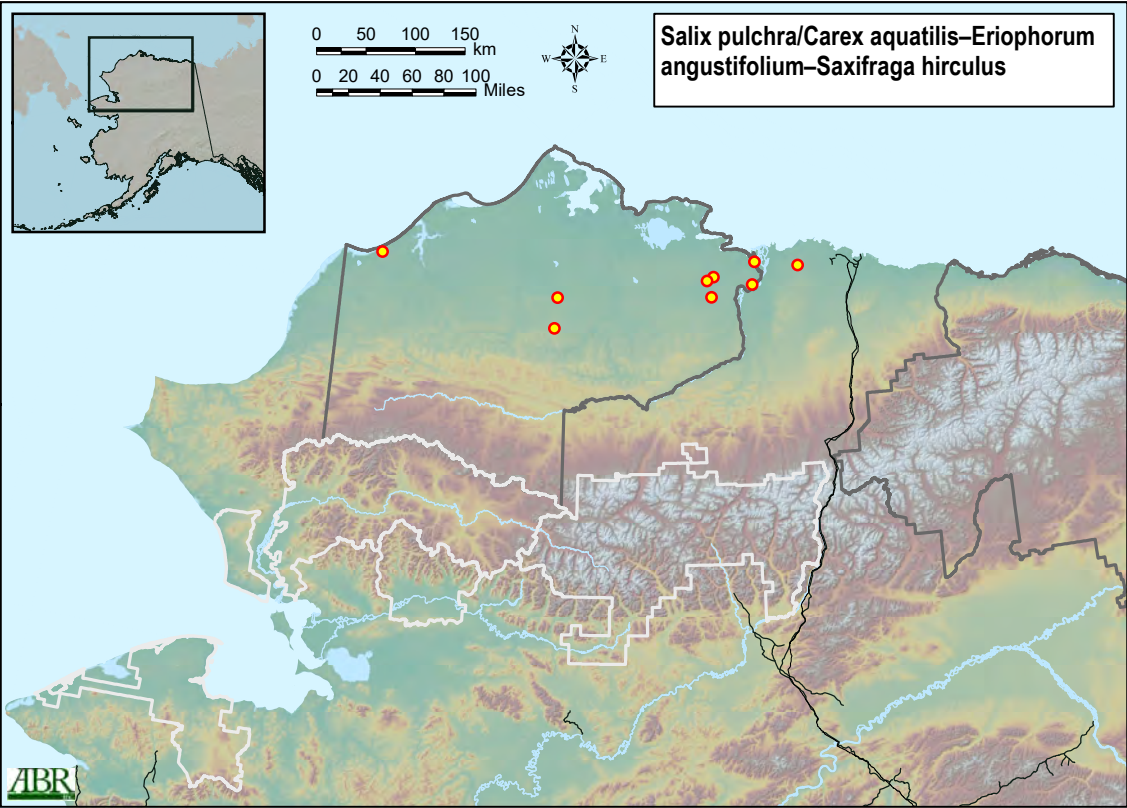

Distribution of *Salix pulchra*/*Carex aquatilis*-*Eriophorum angustifolium*-*Saxifraga hirculus* in the study area.



SALPUL1/CARAQU1-ERiang1-SAXHIR: *Salix pulchra*/*Carex aquatilis*-*Eriophorum angustifolium*-*Saxifraga hirculus*, continued

|                                   | Avg. | Std Dev. | Percentile |      |      | n |
|-----------------------------------|------|----------|------------|------|------|---|
|                                   |      |          | 10th       | 50th | 90th |   |
| Elevation (m)                     | 29   | 26       | 3          | 25   | 54   | 9 |
| Slope (degrees)                   | 1    | 1        | 0          | 0    | 2    | 9 |
| Surface Organic Thickness (cm)    | 23.6 | 7.7      | 17.4       | 23.0 | 34.3 | 9 |
| Cumul. Org. Thickness (cm)        | 26.8 | 6.6      | 18.6       | 25.4 | 34.3 | 9 |
| Depth to >15% Rock Fragments (cm) |      |          |            |      |      | 9 |
| Water Table Depth (cm)            | -12  | 13       | -26        | -13  | 0    | 7 |
| Active Layer Thickness (cm)       | 41   | 12       | 31         | 41   | 52   | 9 |
| Site pH                           | 6.2  | 0.5      | 5.7        | 6.1  | 6.8  | 9 |
| Electrical Conductivity (uS/cm)   | 344  | 348      | 76         | 210  | 918  | 9 |
| Whole Tussock Cover (%)           | 1    | 2        | 0          | 0    | 3    | 7 |

Environmental data summaries for *Salix pulchra*/*Carex aquatilis*-*Eriophorum angustifolium*-*Saxifraga hirculus*.

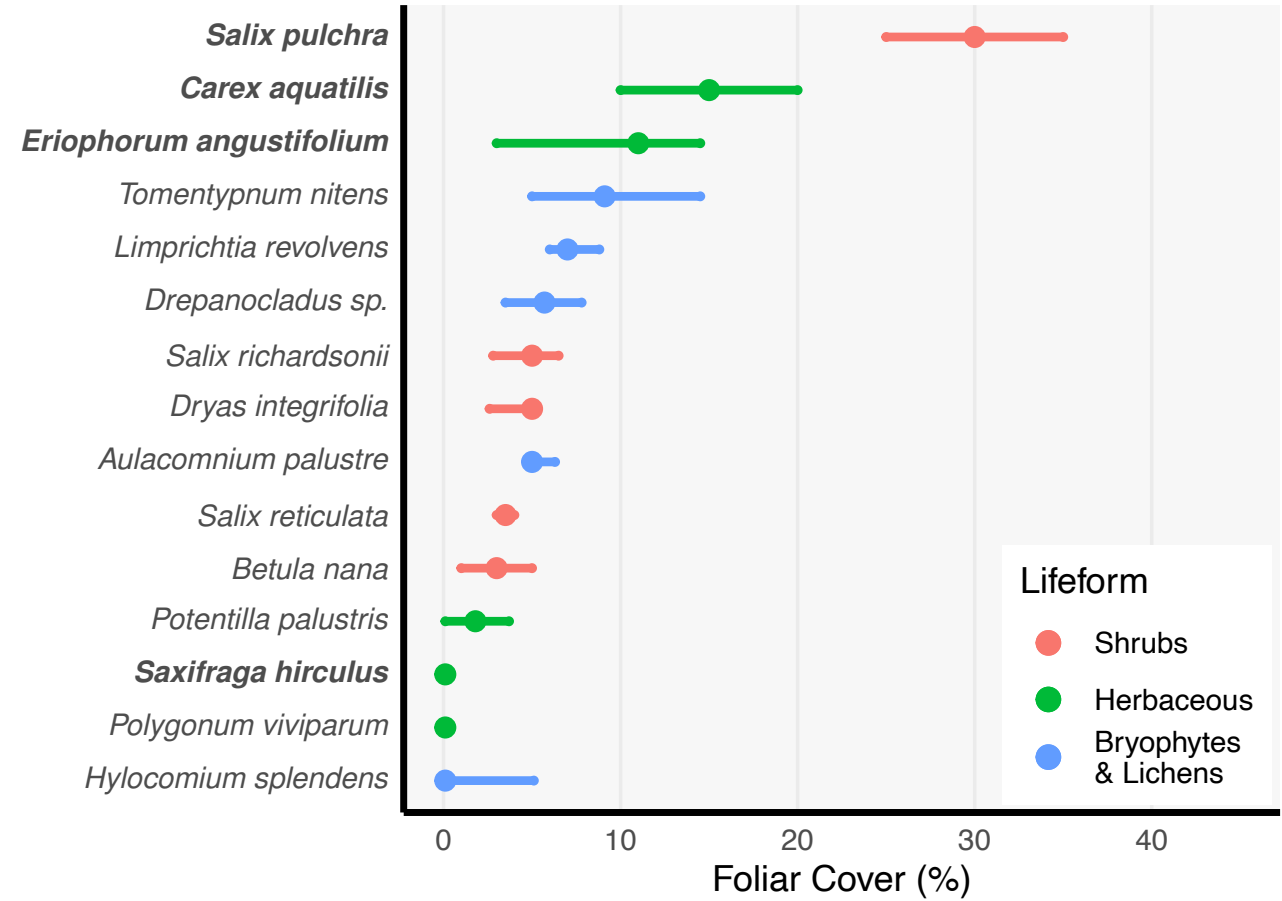

Median and 25th and 75th percentiles of foliar cover for the most common species in 3 lifeform groups in *Salix pulchra*/*Carex aquatilis*-*Eriophorum angustifolium*-*Saxifraga hirculus*. Latin names on y-axis in bold font occur in ≥70% of plots in this plant association.

| Lifeform         | Code   | USDA Scientific Name            | Const. | Avg. | Std Dev. | Percentile |      |      |
|------------------|--------|---------------------------------|--------|------|----------|------------|------|------|
|                  |        |                                 |        |      |          | 10th       | 50th | 90th |
| Deciduous Shrubs | BENA   | <i>Betula nana</i>              | 56     | 3.8  | 3.9      | 0.1        | 3.0  | 8.0  |
| Deciduous Shrubs | SAPU15 | <i>Salix pulchra</i>            | 100    | 31.2 | 12.1     | 19.8       | 30.0 | 50.0 |
| Deciduous Shrubs | SARE2  | <i>Salix reticulata</i>         | 67     | 3.3  | 1.4      | 2.0        | 3.5  | 4.5  |
| Deciduous Shrubs | SARI4  | <i>Salix richardsonii</i>       | 67     | 5.7  | 5.2      | 1.1        | 5.0  | 11.0 |
| Forbs            | POVI3  | <i>Polygonum viviparum</i>      | 67     | 0.1  | 0.4      | 0.1        | 0.1  | 1.0  |
| Forbs            | POPA14 | <i>Potentilla palustris</i>     | 67     | 4.6  | 7.7      | 0.1        | 1.8  | 12.0 |
| Forbs            | SAHI3  | <i>Saxifraga hirculus</i>       | 100    | 0.1  | 0.7      | 0.1        | 0.1  | 1.2  |
| Sedges           | CAAQ   | <i>Carex aquatilis</i>          | 100    | 17.3 | 13.2     | 7.6        | 15.0 | 26.0 |
| Sedges           | ERAN6  | <i>Eriophorum angustifolium</i> | 100    | 9.8  | 6.6      | 1.8        | 11.0 | 16.0 |
| Mosses           | AUPA70 | <i>Aulacomnium palustre</i>     | 44     | 6.0  | 2.7      | 4.3        | 5.0  | 8.5  |
| Mosses           | TONI70 | <i>Tomentypnum nitens</i>       | 67     | 10.9 | 8.6      | 3.5        | 9.1  | 20.0 |

Constancy and foliar cover data summaries for *Salix pulchra*/*Carex aquatilis*-*Eriophorum angustifolium*-*Saxifraga hirculus*. Constancy/cover summaries limited to taxa occurring in this plant association with a constancy ≥60 and average cover >0, or taxa with a constancy ≥40 and average cover ≥3.



**SALPUL1/CARBIG: *Salix pulchra*/*Carex bigelowii* (n = 9)**

The plant association *Salix pulchra*/*Carex bigelowii* occurs in Lowland, Riverine, and Upland physiography most commonly on the following geomorphic units: Hillside Colluvium; Loess; and Lowland Headwater Floodplain Overbank Deposit. The average elevation in this plant association is 368 m ( $\pm 406$  m), and the slope gradient typically ranges between flat and strongly sloping. This plant association was associated most commonly with the surface form Non-patterned, but is also regularly associated with Hummocks; Non-sorted Circles, boils and scars; and Water tracks (non-incised drainages). Soils are somewhat poorly drained to moderately well drained, surface organic thickness typically ranges from thin to moderately thick, coarse fragments are uncommon, but when they do occur the average top depth is 68 cm ( $\pm 77$  cm), dominant soil texture in the upper 40 cm is typically Loamy or Organic-rich, and permafrost was common with an average active layer thickness of 37 cm ( $\pm 14$  cm). Soil pH typically ranges from acidic to circumacidic, and the average electrical conductivity is 80  $\mu$ S/cm ( $\pm 64$   $\mu$ S/cm). The most common vegetation types include Open Low Willow and Closed Low Willow. The vegetation is dominated by *Salix pulchra*, and *Carex bigelowii* is always present in the understory at moderate to high cover. Other plant taxa that commonly occur in this plant association at low abundance include, the shrubs *Vaccinium uliginosum*, *Salix reticulata*, *Ledum palustre* ssp. *decumbens*, and *Betula nana*; the herbs *Petasites frigidus*, *Eriophorum angustifolium*, *Carex aquatilis*, and *Poa arctica*; and the nonvasculars *Tomentypnum nitens*, *Aulacomnium palustre*, *Hylocomium splendens*, *Aulacomnium turgidum*, and *Polytrichum strictum*.

A4337: Arctic Acidic Low Willow Tundra Alliance

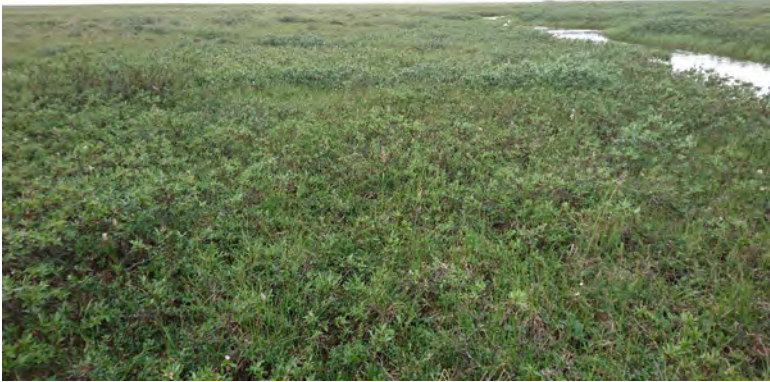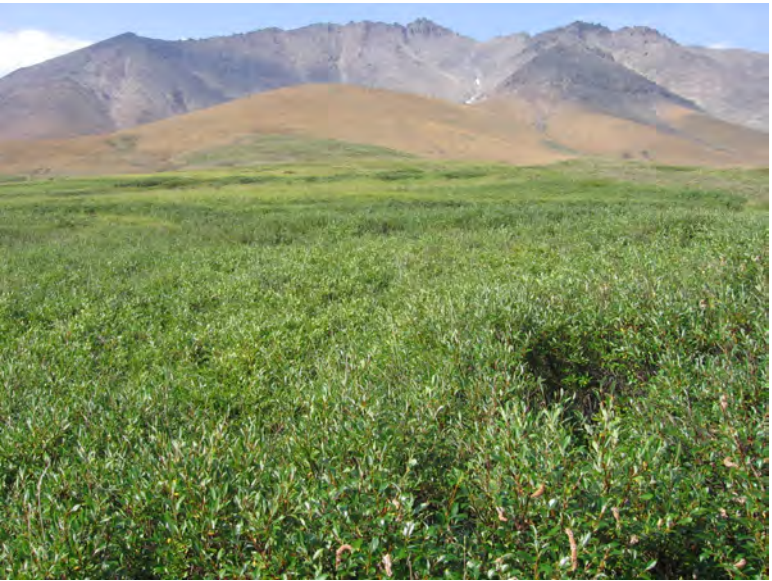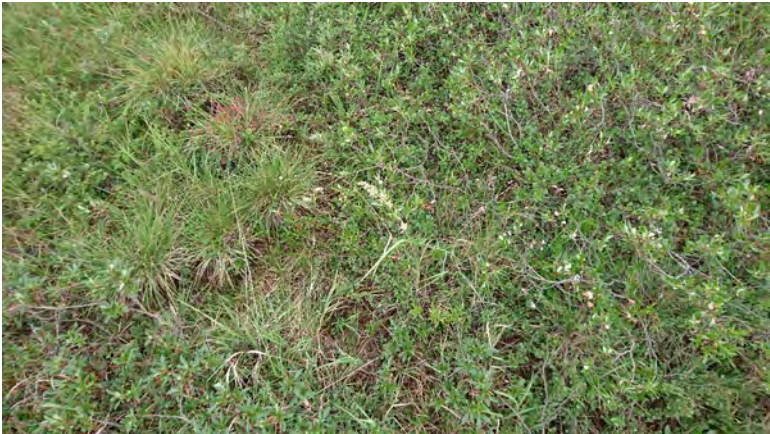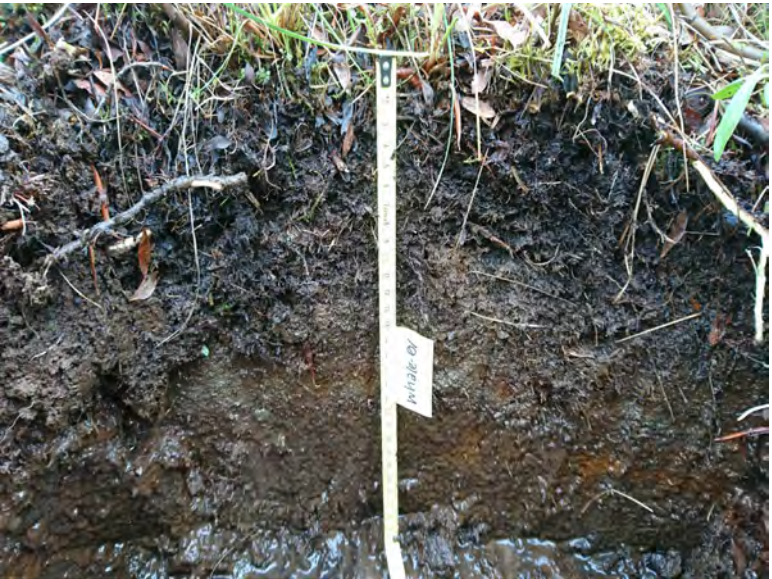

Representative photos (if available) for *Salix pulchra*/*Carex bigelowii*. Top row: landscape photos, bottom row: ground photo (left), soil photo (right).

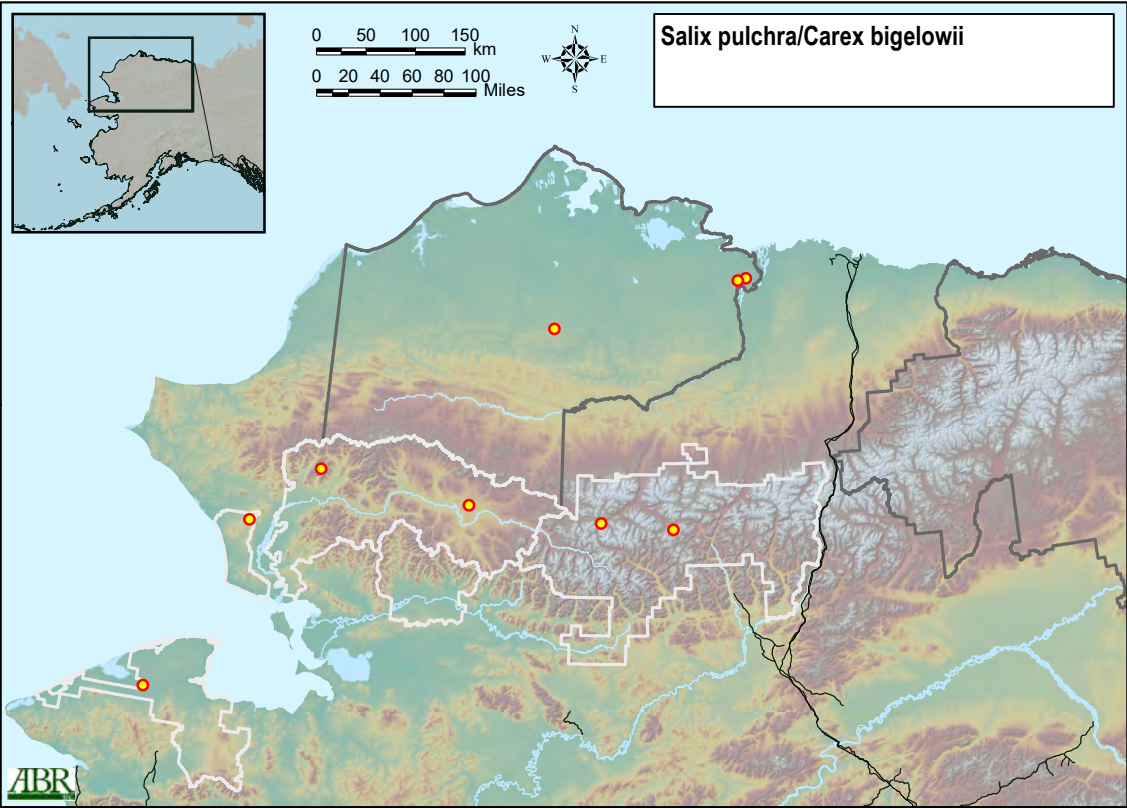

Distribution of *Salix pulchra*/*Carex bigelowii* in the study area.



SALPUL1/CARBIG: *Salix pulchra*/*Carex bigelowii*, continued

|                                   | Avg. | Std Dev. | Percentile |      |      | n |
|-----------------------------------|------|----------|------------|------|------|---|
|                                   |      |          | 10th       | 50th | 90th |   |
| Elevation (m)                     | 368  | 406      | 15         | 237  | 943  | 9 |
| Slope (degrees)                   | 3    | 3        | 0          | 3    | 6    | 9 |
| Surface Organic Thickness (cm)    | 15.8 | 8.1      | 6.6        | 15.0 | 25.2 | 9 |
| Cumul. Org. Thickness (cm)        | 16.8 | 9.5      | 6.6        | 18.0 | 26.4 | 9 |
| Depth to >15% Rock Fragments (cm) | 68   | 77       | 20         | 26   | 150  | 5 |
| Water Table Depth (cm)            | -20  | 12       | -33        | -18  | -9   | 5 |
| Active Layer Thickness (cm)       | 37   | 14       | 26         | 34   | 51   | 6 |
| Site pH                           | 5.8  | 0.4      | 5.5        | 5.7  | 6.2  | 9 |
| Electrical Conductivity (uS/cm)   | 80   | 64       | 30         | 50   | 182  | 9 |
| Whole Tussock Cover (%)           | 2    | 3        | 0          | 1    | 4    | 9 |

Environmental data summaries for *Salix pulchra*/*Carex bigelowii*.

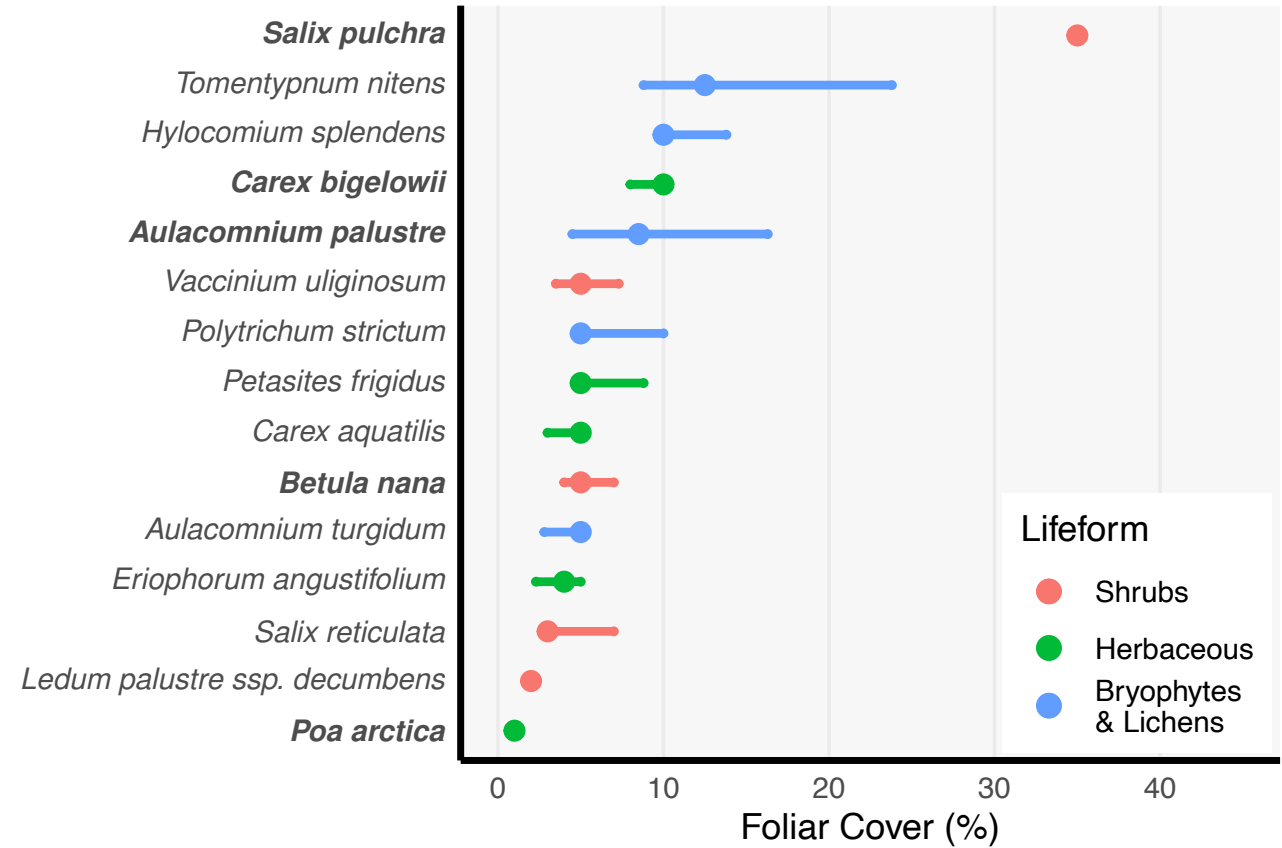

Median and 25th and 75th percentiles of foliar cover for the most common species in 3 lifeform groups in *Salix pulchra*/*Carex bigelowii*. Latin names on y-axis in bold font occur in ≥70% of plots in this plant association.

| Lifeform         | Code   | USDA Scientific Name            | Const. | Avg. | Std Dev. | Percentile |      |      |
|------------------|--------|---------------------------------|--------|------|----------|------------|------|------|
|                  |        |                                 |        |      |          | 10th       | 50th | 90th |
| Deciduous Shrubs | BENA   | <i>Betula nana</i>              | 78     | 5.7  | 2.5      | 3.0        | 5.0  | 8.2  |
| Deciduous Shrubs | SAPU15 | <i>Salix pulchra</i>            | 100    | 43.0 | 22.6     | 19.0       | 35.0 | 76.0 |
| Deciduous Shrubs | SARE2  | <i>Salix reticulata</i>         | 56     | 5.0  | 3.4      | 2.4        | 3.0  | 8.8  |
| Deciduous Shrubs | VAUL   | <i>Vaccinium uliginosum</i>     | 67     | 7.3  | 6.5      | 3.0        | 5.0  | 14.0 |
| Forbs            | PEFR5  | <i>Petasites frigidus</i>       | 67     | 6.7  | 5.1      | 2.6        | 5.0  | 12.5 |
| Ferns & Allies   | EQAR   | <i>Equisetum arvense</i>        | 44     | 5.0  | 3.6      | 2.3        | 4.0  | 8.5  |
| Grasses          | ARLA2  | <i>Arctagrostis latifolia</i>   | 56     | 3.8  | 2.8      | 1.4        | 3.0  | 6.8  |
| Grasses          | POAR2  | <i>Poa arctica</i>              | 89     | 1.0  | 0.5      | 1.0        | 1.0  | 1.3  |
| Sedges           | CAAQ   | <i>Carex aquatilis</i>          | 56     | 4.0  | 1.4      | 2.4        | 5.0  | 5.0  |
| Sedges           | CABI5  | <i>Carex bigelowii</i>          | 100    | 10.2 | 4.2      | 6.6        | 10.0 | 13.6 |
| Sedges           | ERAN6  | <i>Eriophorum angustifolium</i> | 67     | 3.7  | 1.5      | 2.0        | 4.0  | 5.0  |
| Sedges           | ERVA4  | <i>Eriophorum vaginatum</i>     | 44     | 3.5  | 4.4      | 1.0        | 1.5  | 7.6  |
| Mosses           | AUPA70 | <i>Aulacomnium palustre</i>     | 89     | 12.9 | 12.5     | 3.0        | 8.5  | 26.0 |
| Mosses           | AUTU70 | <i>Aulacomnium turgidum</i>     | 67     | 4.2  | 2.8      | 1.1        | 5.0  | 6.5  |
| Mosses           | HYSP70 | <i>Hylocomium splendens</i>     | 67     | 12.0 | 7.6      | 6.0        | 10.0 | 20.0 |
| Mosses           | POST70 | <i>Polytrichum strictum</i>     | 56     | 11.6 | 13.3     | 3.8        | 5.0  | 25.0 |
| Mosses           | TONI70 | <i>Tomentypnum nitens</i>       | 44     | 20.0 | 20.4     | 6.5        | 12.5 | 39.5 |

Constancy and foliar cover data summaries for *Salix pulchra*/*Carex bigelowii*. Constancy/cover summaries limited to taxa occurring in this plant association with a constancy ≥60 and average cover >0, or taxa with a constancy ≥40 and average cover ≥3.



**SALPUL1/ERIANG1: *Salix pulchra*/*Eriophorum angustifolium* (n = 6)**

The plant association *Salix pulchra*/*Eriophorum angustifolium* occurs in Lowland physiography most commonly on the following geomorphic units: Alluvial-Marine Deposit; Headwater Stream or Floodplain; and Lowland Headwater Floodplain Overbank Deposit. The average elevation in this plant association is 107 m ( $\pm 116$  m), and the slope gradient typically ranges between nearly level and gently sloping. This plant association was associated most commonly with the surface form Nonpatterned, but is also regularly associated with Water tracks (non-incised drainages); High-centered, Low-relief Polygons; and Mixed pits and polygons. Soils are very poorly drained to poorly drained, surface organic thickness is typically moderately thick, coarse fragments are rare, but when they do occur the average top depth is 37 cm ( $\pm 0$  cm), and permafrost was common with an average active layer thickness of 52 cm ( $\pm 14$  cm). Water pH typically ranges from acidic to circumacidic, and the average electrical conductivity is 189  $\mu$ S/cm ( $\pm 241$   $\mu$ S/cm). The most common vegetation types include Open Low Willow-Sedge Shrub Tundra, Open Low Willow, and Wet Sedge-Willow Tundra. The vegetation is dominated by *Salix pulchra*, and *Eriophorum angustifolium* is always present in the understory at moderate to high cover. Other plant taxa that commonly occur in this plant association at low abundance include, the shrubs *Salix reticulata*, *Dryas integrifolia*, *Betula nana*, and *Salix arctica*; the herbs *Petasites frigidus*, *Carex bigelowii*, *Valeriana capitata*, and *Poa arctica*; and the nonvasculars *Hylocomium splendens*, *Aulacomnium palustre*, *Ditrichum flexicaule*, *Peltigera aphthosa*, and *Sphagnum squarrosum*. The soils in this plant association range from wet to flooded, and dwarf shrubs are generally limited to moist micro-highs.

A4366p: Arctic Ombrotrophic Wet Low Shrublands (proposed)

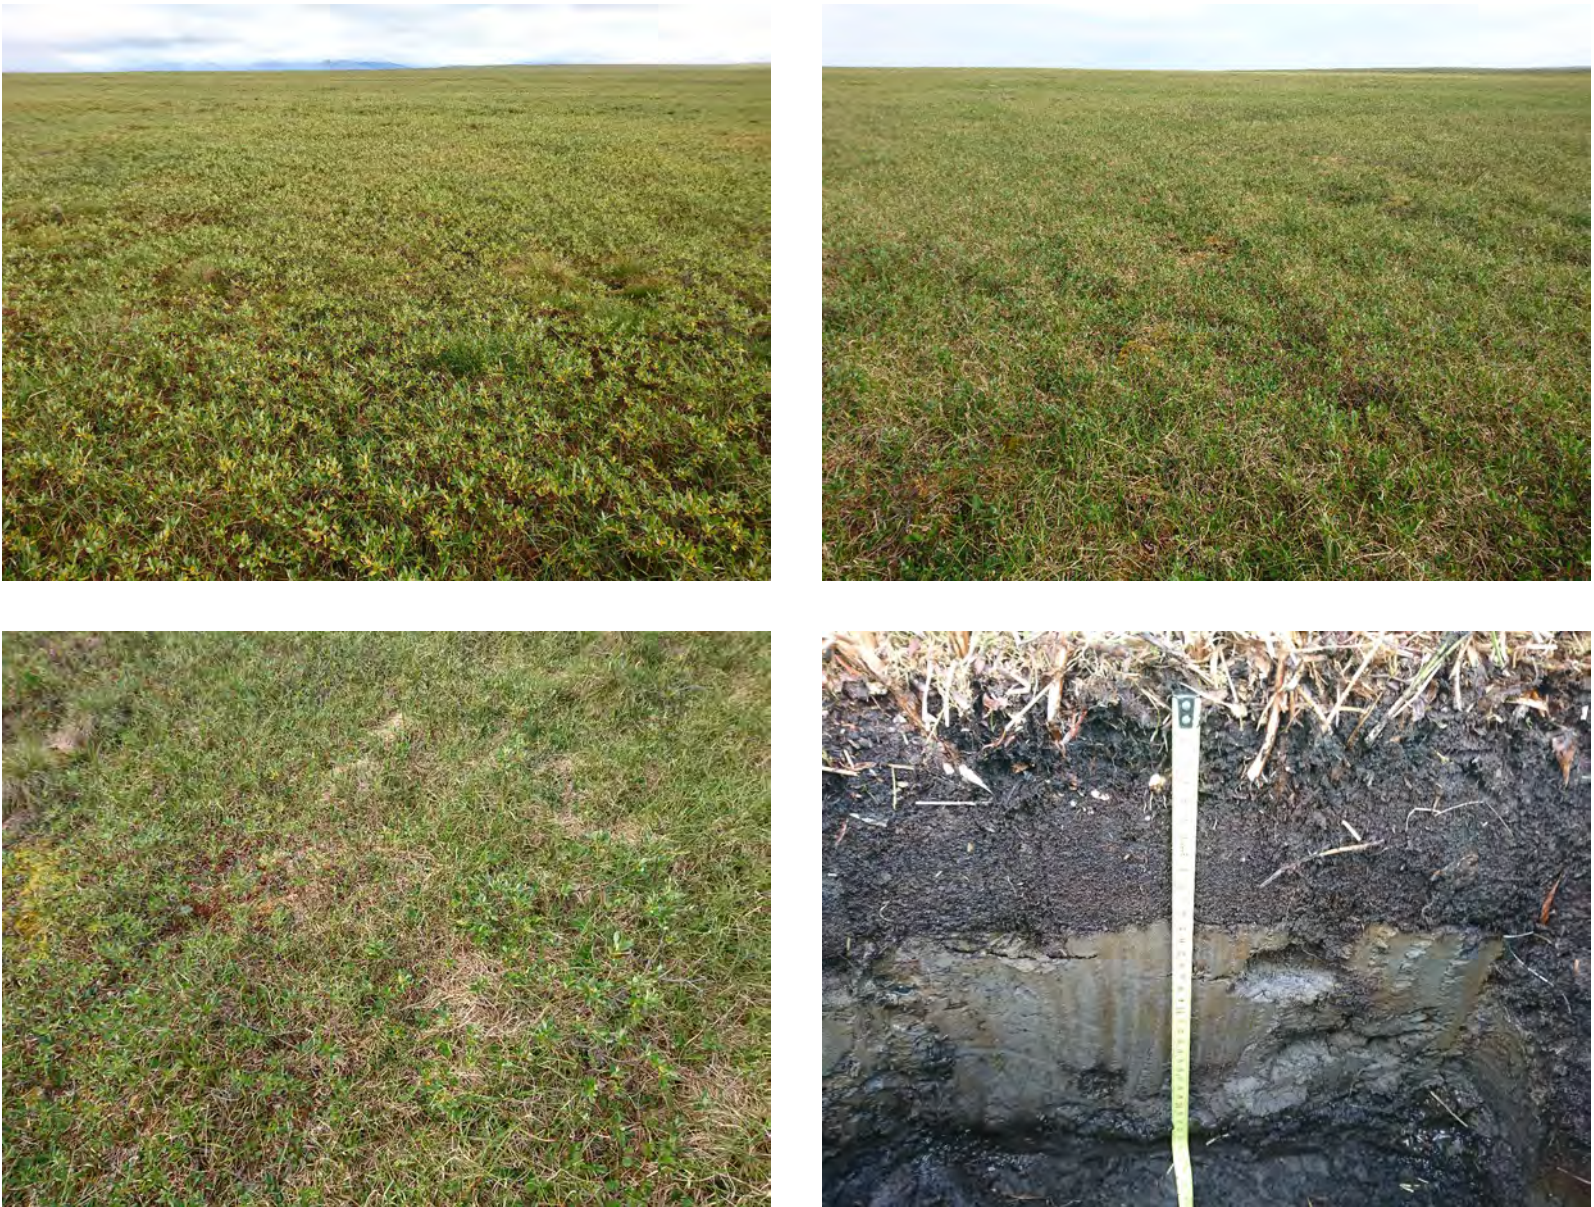

Representative photos (if available) for *Salix pulchra*/*Eriophorum angustifolium*. Top row: landscape photos, bottom row: ground photo (left), soil photo (right).

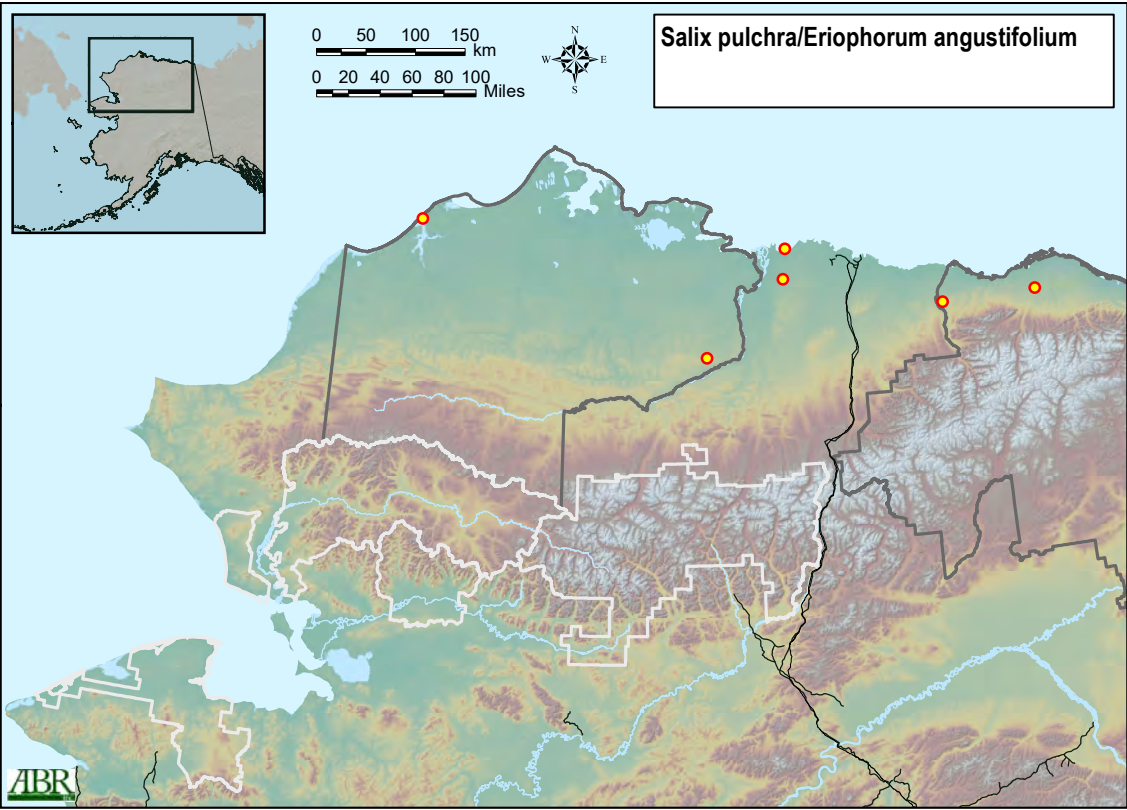

Distribution of *Salix pulchra*/*Eriophorum angustifolium* in the study area.



SALPUL1/ERIANG1: *Salix pulchra*/*Eriophorum angustifolium*, continued

|                                   | Avg. | Std Dev. | Percentile |      |      | n |
|-----------------------------------|------|----------|------------|------|------|---|
|                                   |      |          | 10th       | 50th | 90th |   |
| Elevation (m)                     | 107  | 116      | -3         | 78   | 247  | 6 |
| Slope (degrees)                   | 2    | 2        | 0          | 2    | 4    | 6 |
| Surface Organic Thickness (cm)    | 17.5 | 3.2      | 14.5       | 17.0 | 21.0 | 6 |
| Cumul. Org. Thickness (cm)        | 20.5 | 3.2      | 17.0       | 21.0 | 23.5 | 6 |
| Depth to >15% Rock Fragments (cm) | 37   |          | 37         | 37   | 37   | 1 |
| Water Table Depth (cm)            | -12  | 15       | -26        | -8   | -1   | 5 |
| Active Layer Thickness (cm)       | 52   | 14       | 38         | 55   | 63   | 4 |
| Site pH                           | 5.9  | 0.7      | 5.3        | 5.9  | 6.6  | 6 |
| Electrical Conductivity (uS/cm)   | 189  | 241      | 45         | 80   | 441  | 6 |
| Whole Tussock Cover (%)           | 1    | 1        | 0          | 0    | 3    | 5 |

Environmental data summaries for *Salix pulchra*/*Eriophorum angustifolium*.

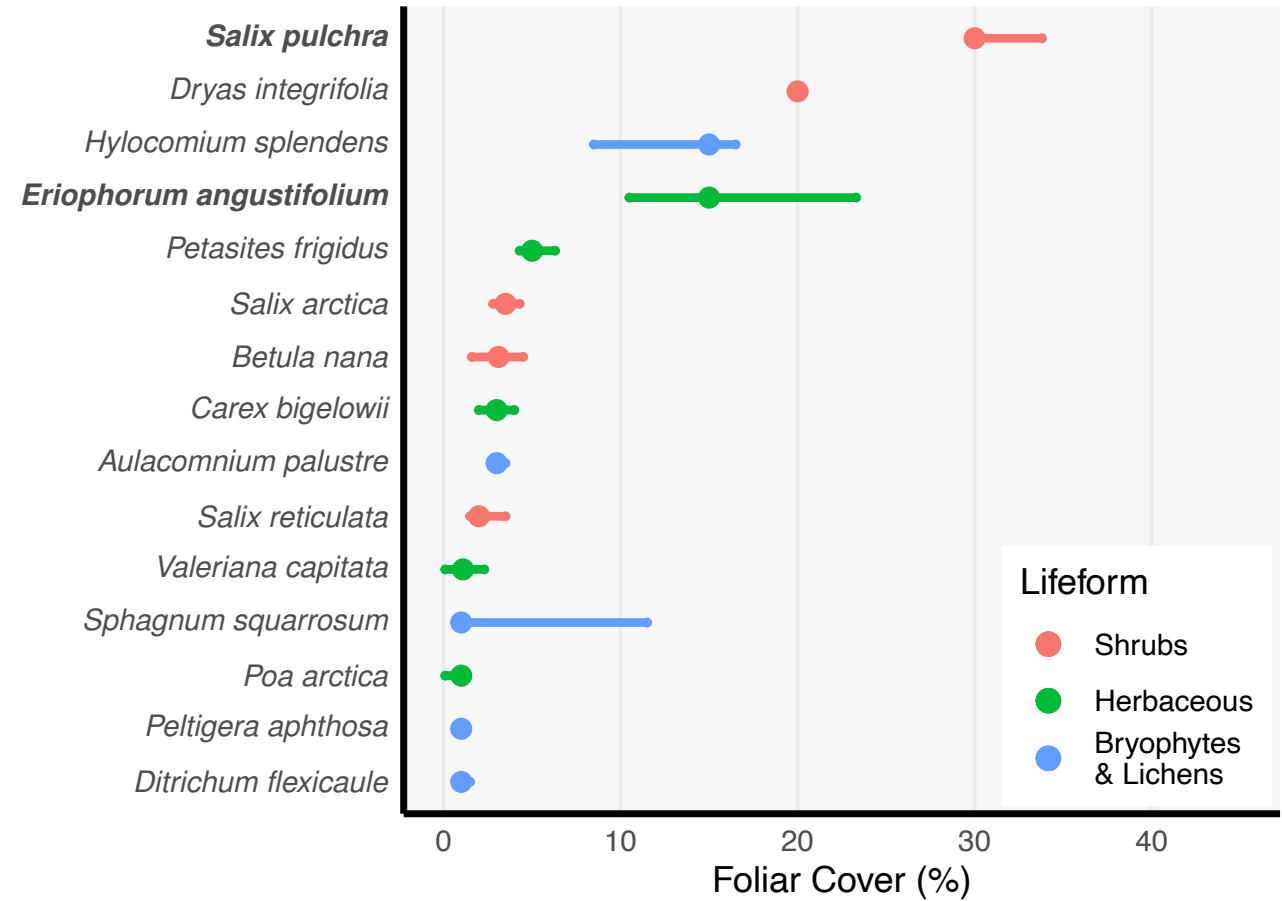

Median and 25th and 75th percentiles of foliar cover for the most common species in 3 lifeform groups in *Salix pulchra*/*Eriophorum angustifolium*. Latin names on y-axis in bold font occur in ≥70% of plots in this plant association.

| Lifeform         | Code   | USDA Scientific Name            | Const. | Avg. | Std Dev. | Percentile |      |      |
|------------------|--------|---------------------------------|--------|------|----------|------------|------|------|
|                  |        |                                 |        |      |          | 10th       | 50th | 90th |
| Deciduous Shrubs | SAPU15 | <i>Salix pulchra</i>            | 100    | 33.3 | 6.1      | 30.0       | 30.0 | 40.0 |
| Forbs            | PEFR5  | <i>Petasites frigidus</i>       | 67     | 5.5  | 3.3      | 2.9        | 5.0  | 8.5  |
| Forbs            | VACA3  | <i>Valeriana capitata</i>       | 67     | 1.3  | 1.4      | 0.1        | 1.1  | 2.7  |
| Grasses          | POAR2  | <i>Poa arctica</i>              | 67     | 1.0  | 0.5      | 0.1        | 1.0  | 1.0  |
| Sedges           | CABI5  | <i>Carex bigelowii</i>          | 50     | 3.0  | 2.0      | 1.4        | 3.0  | 4.6  |
| Sedges           | ERAN6  | <i>Eriophorum angustifolium</i> | 100    | 17.5 | 8.4      | 10.0       | 15.0 | 27.5 |
| Mosses           | AUPA70 | <i>Aulacomnium palustre</i>     | 50     | 3.3  | 0.6      | 3.0        | 3.0  | 3.8  |
| Mosses           | HYSP70 | <i>Hylocomium splendens</i>     | 50     | 11.7 | 8.5      | 4.6        | 15.0 | 17.4 |
| Mosses           | SPSQ70 | <i>Sphagnum squarrosum</i>      | 50     | 7.7  | 12.4     | 0.1        | 1.0  | 17.8 |

Constancy and foliar cover data summaries for *Salix pulchra*/*Eriophorum angustifolium*. Constancy/cover summaries limited to taxa occurring in this plant association with a constancy ≥60 and average cover >0, or taxa with a constancy ≥40 and average cover ≥3.



**SALPUL1/ERIVAG: *Salix pulchra*/*Eriophorum vaginatum* (n = 27)**

A4345p: Arctic Nonacidic Shrub Tussock Tundra Alliance (proposed)

The plant association *Salix pulchra*/*Eriophorum vaginatum* occurs in Upland physiography most commonly on the following geomorphic units: Eolian Sand Sheet Upland; Alluvial-Marine Deposit; and Upland Loess. The average elevation in this plant association is 34 m ( $\pm 48$  m), and the slope gradient typically ranges between flat and nearly level. This plant association was associated most commonly with the surface form High-centered, Low-relief Polygons, but is also regularly associated with Nonpatterned; Mixed pits and polygons; and Low-centered, High-relief, High-density Polygons. Soils are poorly drained to somewhat poorly drained, surface organic thickness typically ranges from thin to moderately thick, coarse fragments are uncommon, but when they do occur the average top depth is 23 cm ( $\pm 8$  cm), dominant soil texture in the upper 40 cm is typically Loamy or Organic-rich, and permafrost was common with an average active layer thickness of 33 cm ( $\pm 7$  cm). Soil pH is typically circumacidic, and the average electrical conductivity is 147  $\mu$ S/cm ( $\pm 131$   $\mu$ S/cm). The most common vegetation type is Open Mixed Low Shrub-Sedge Tussock Tundra. The vegetation is dominated by *Salix pulchra* which typically forms an open low shrub canopy, and *Eriophorum vaginatum* forms conspicuous tussocks with a cover of whole tussocks of at least 25%. Other plant taxa that commonly occur in this plant association at low abundance include, the shrubs *Vaccinium vitis-idaea*, *Cassiope tetragona*, *Ledum palustre* ssp. *decumbens*, and *Salix reticulata*; the herbs *Arctagrostis latifolia*, *Polygonum bistorta*, *Saussurea angustifolia*, and *Carex bigelowii*; and the nonvasculars *Aulacomnium turgidum*, *Hylocomium splendens*, *Dactylina arctica*, *Thamnia vermicularis*, and *Flavocetraria cucullata*.

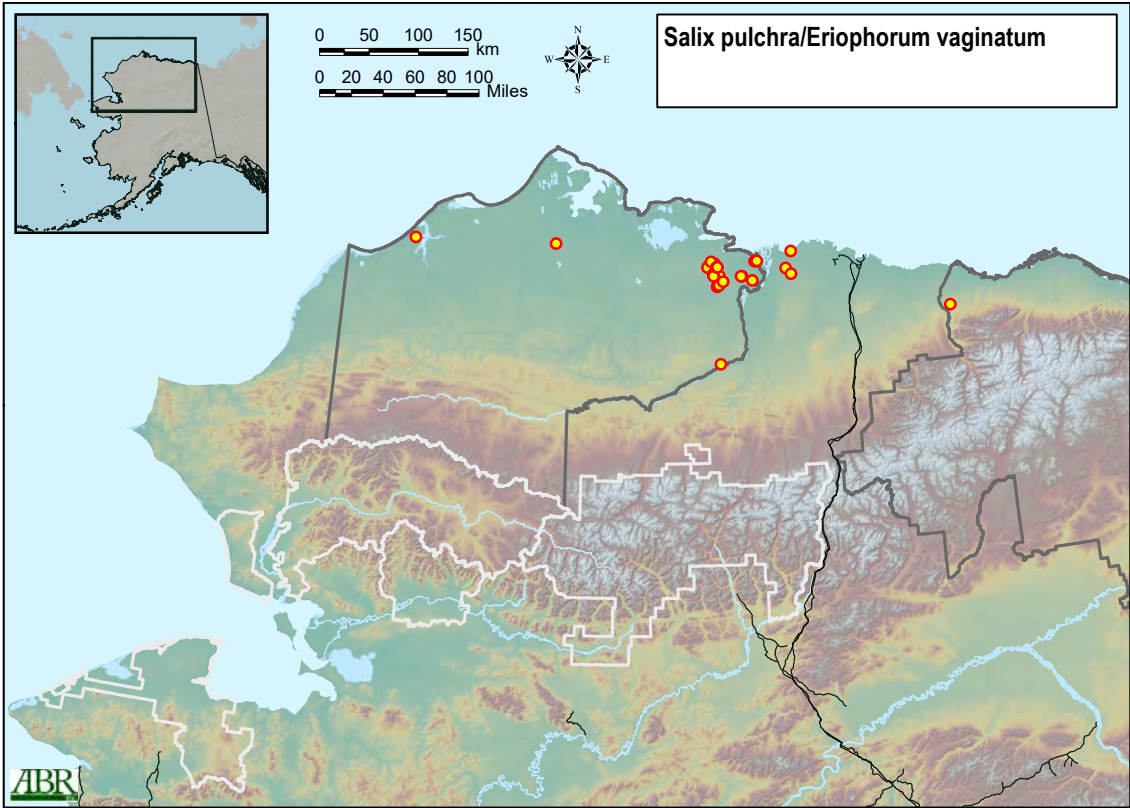

Distribution of *Salix pulchra*/*Eriophorum vaginatum* in the study area.

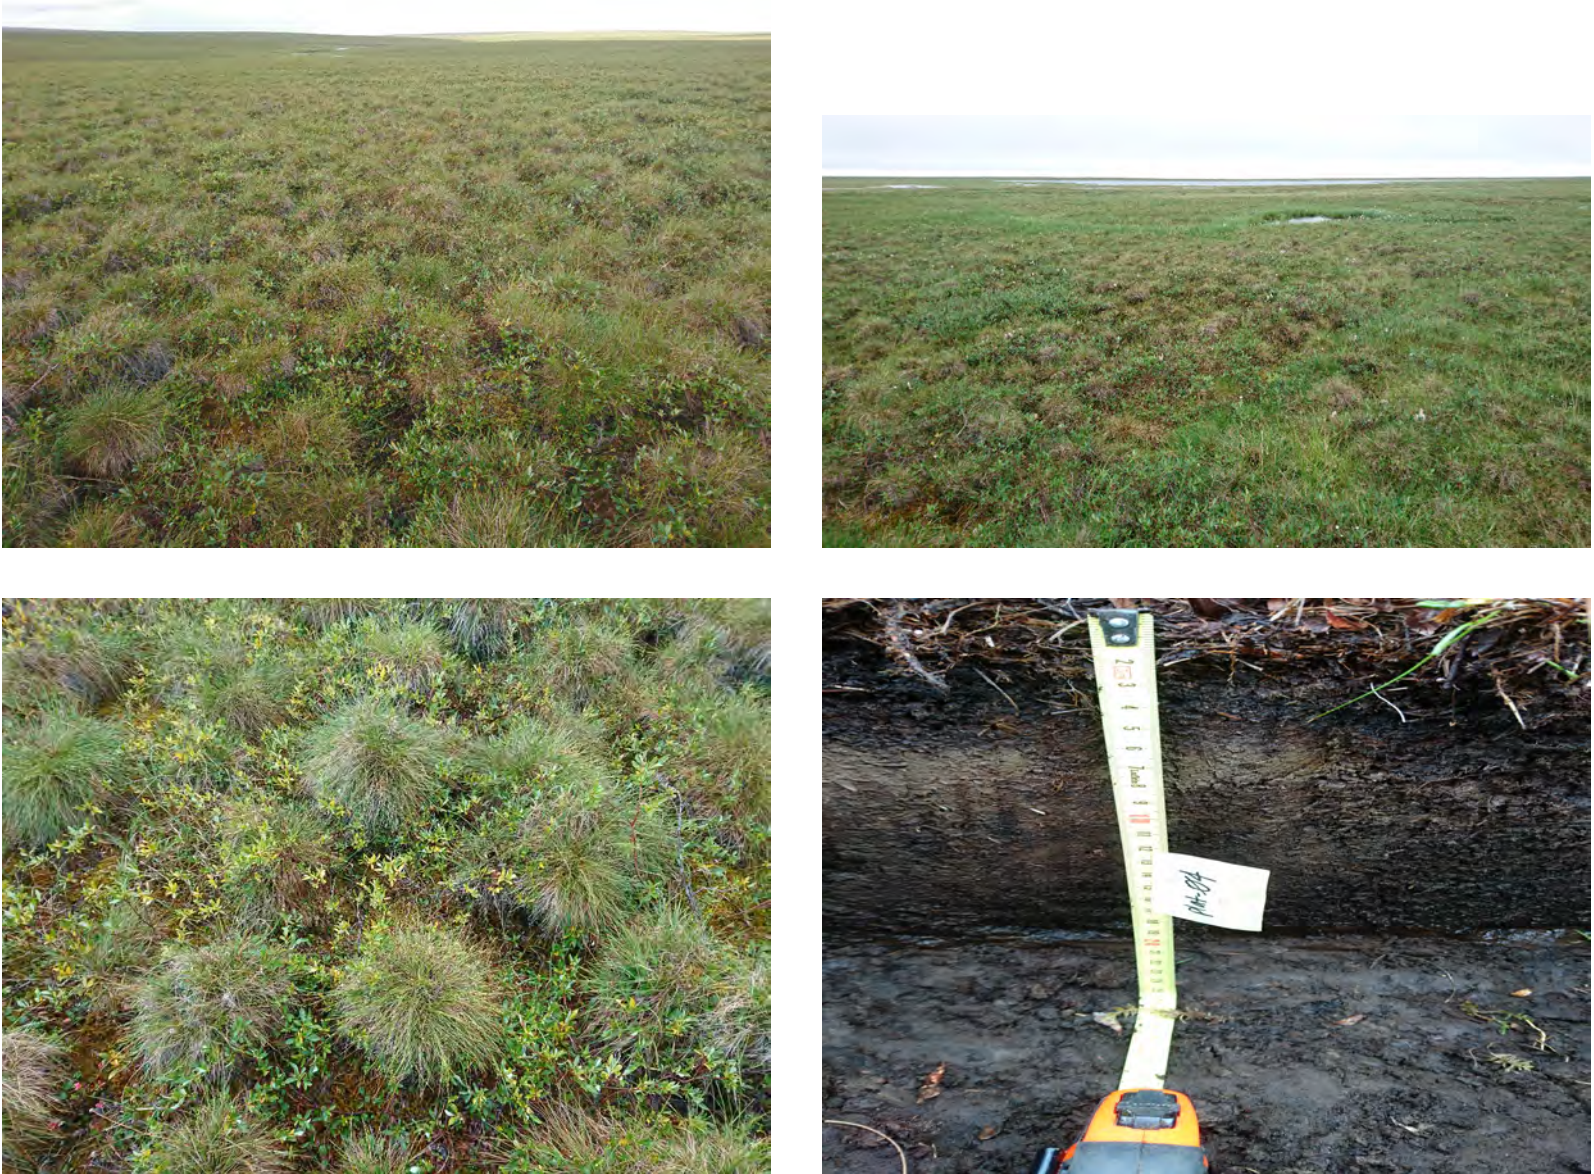

Representative photos (if available) for *Salix pulchra*/*Eriophorum vaginatum*. Top row: landscape photos, bottom row: ground photo (left), soil photo (right).



SALPUL1/ERIVAG: *Salix pulchra*/*Eriophorum vaginatum*, continued

|                                   | Avg. | Std Dev. | Percentile |      |      | n  |
|-----------------------------------|------|----------|------------|------|------|----|
|                                   |      |          | 10th       | 50th | 90th |    |
| Elevation (m)                     | 34   | 48       | 11         | 24   | 31   | 25 |
| Slope (degrees)                   | 2    | 1        | 0          | 2    | 3    | 25 |
| Surface Organic Thickness (cm)    | 11.1 | 6.6      | 6.0        | 10.2 | 22.0 | 27 |
| Cumul. Org. Thickness (cm)        | 14.3 | 6.7      | 8.2        | 10.2 | 23.0 | 25 |
| Depth to >15% Rock Fragments (cm) | 23   | 8        | 14         | 22   | 32   | 7  |
| Water Table Depth (cm)            | -26  | 9        | -34        | -25  | -21  | 15 |
| Active Layer Thickness (cm)       | 33   | 7        | 25         | 33   | 44   | 20 |
| Site pH                           | 6.0  | 0.7      | 5.3        | 5.9  | 6.9  | 25 |
| Electrical Conductivity (uS/cm)   | 147  | 131      | 53         | 110  | 273  | 24 |
| Whole Tussock Cover (%)           | 41   | 17       | 20         | 35   | 64   | 14 |

Environmental data summaries for *Salix pulchra*/*Eriophorum vaginatum*.

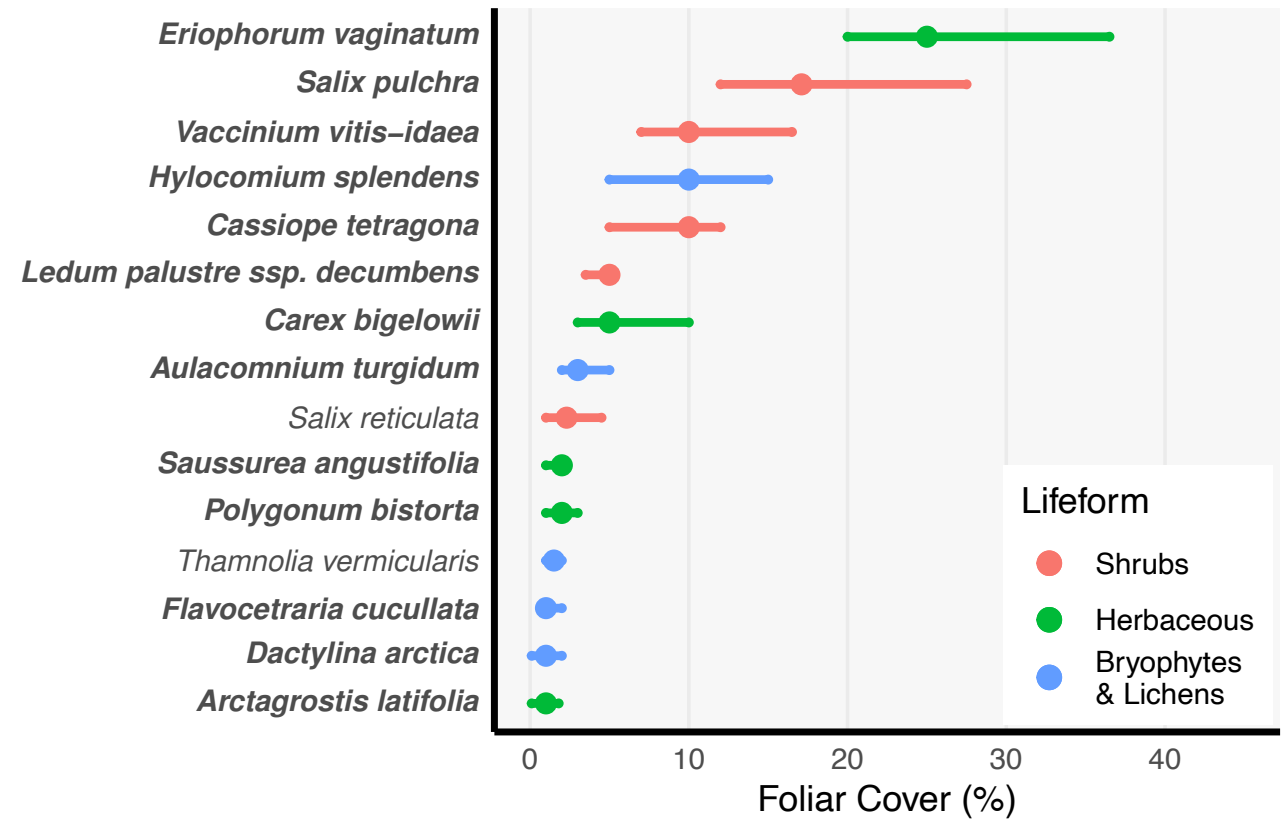

Median and 25th and 75th percentiles of foliar cover for the most common species in 3 lifeform groups in *Salix pulchra*/*Eriophorum vaginatum*. Latin names on y-axis in bold font occur in ≥70% of plots in this plant association.

| Lifeform         | Code   | USDA Scientific Name                    | Const. | Avg. | Std Dev. | Percentile |      |      |
|------------------|--------|-----------------------------------------|--------|------|----------|------------|------|------|
|                  |        |                                         |        |      |          | 10th       | 50th | 90th |
| Deciduous Shrubs | BENA   | <i>Betula nana</i>                      | 48     | 3.9  | 2.5      | 2.0        | 3.0  | 6.6  |
| Deciduous Shrubs | SAPH   | <i>Salix phlebophylla</i>               | 41     | 5.1  | 5.7      | 1.0        | 3.0  | 10.0 |
| Deciduous Shrubs | SAPU15 | <i>Salix pulchra</i>                    | 100    | 20.2 | 10.5     | 10.0       | 17.1 | 35.4 |
| Deciduous Shrubs | SARE2  | <i>Salix reticulata</i>                 | 67     | 3.1  | 2.7      | 0.1        | 2.3  | 7.0  |
| Evergreen Shrubs | CATE11 | <i>Cassiope tetragona</i>               | 93     | 9.7  | 6.4      | 3.4        | 10.0 | 15.6 |
| Evergreen Shrubs | DRIN4  | <i>Dryas integrifolia</i>               | 63     | 4.5  | 5.3      | 1.0        | 2.0  | 12.0 |
| Evergreen Shrubs | LEPAD  | <i>Ledum palustre ssp. decumbens</i>    | 85     | 5.0  | 2.6      | 2.0        | 5.0  | 9.6  |
| Evergreen Shrubs | VAVI   | <i>Vaccinium vitis-idaea</i>            | 100    | 11.4 | 7.2      | 4.2        | 10.0 | 20.0 |
| Forbs            | POBIP2 | <i>Polygonum bistorta ssp. plumosum</i> | 78     | 3.2  | 3.5      | 1.0        | 2.0  | 8.0  |
| Forbs            | SAAN3  | <i>Saussurea angustifolia</i>           | 78     | 2.5  | 2.6      | 1.0        | 2.0  | 6.0  |
| Forbs            | SEAT2  | <i>Senecio atropurpureus</i>            | 74     | 1.0  | 0.9      | 0.1        | 1.0  | 2.0  |
| Grasses          | ARLA2  | <i>Arctagrostis latifolia</i>           | 81     | 1.4  | 1.7      | 0.1        | 1.0  | 3.0  |
| Grasses          | POAR2  | <i>Poa arctica</i>                      | 78     | 0.1  | 0.4      | 0.1        | 0.1  | 1.0  |
| Sedges           | CABI5  | <i>Carex bigelowii</i>                  | 100    | 6.4  | 4.7      | 1.6        | 5.0  | 10.8 |
| Sedges           | ERAN6  | <i>Eriophorum angustifolium</i>         | 44     | 3.8  | 3.6      | 0.1        | 2.5  | 9.1  |
| Sedges           | ERVA4  | <i>Eriophorum vaginatum</i>             | 100    | 29.5 | 12.9     | 16.8       | 25.0 | 50.0 |
| Mosses           | AUPA70 | <i>Aulacomnium palustre</i>             | 52     | 3.1  | 3.3      | 0.1        | 2.0  | 8.5  |
| Mosses           | AUTU70 | <i>Aulacomnium turgidum</i>             | 78     | 4.3  | 4.5      | 0.1        | 3.0  | 8.0  |
| Mosses           | HYSP70 | <i>Hylocomium splendens</i>             | 74     | 11.7 | 12.2     | 1.9        | 10.0 | 20.5 |
| Mosses           | TONI70 | <i>Tomentypnum nitens</i>               | 56     | 5.4  | 4.1      | 2.0        | 5.0  | 10.0 |
| Liverworts       | PTCI   | <i>Ptilidium ciliare</i>                | 52     | 3.7  | 4.0      | 1.0        | 2.0  | 8.5  |
| Lichens          | DAAR60 | <i>Dactylina arctica</i>                | 74     | 1.5  | 2.0      | 0.1        | 1.0  | 4.1  |
| Lichens          | FLCU   | <i>Flavocetraria cucullata</i>          | 85     | 1.8  | 2.1      | 0.1        | 1.0  | 4.6  |

Constancy and foliar cover data summaries for *Salix pulchra*/*Eriophorum vaginatum*. Constancy/cover summaries limited to taxa occurring in this plant association with a constancy ≥60 and average cover >0, or taxa with a constancy ≥40 and average cover ≥3.



**SALPUL1/PETFRI: *Salix pulchra*/*Petasites frigidus* (n = 7)**

A4337: Arctic Acidic Low Willow Tundra Alliance

The plant association *Salix pulchra*/*Petasites frigidus* occurs in Lowland and Riverine physiography most commonly on the following geomorphic units: Hillside Colluvium; Lowland Headwater Floodplain Overbank Deposit; and Meander Abandoned Overbank Deposit. The average elevation in this plant association is 114 m ( $\pm 150$  m), and the slope gradient typically ranges between flat and nearly level. This plant association was associated most commonly with the surface form Nonpatterned, but is also regularly associated with Hummocks; Undifferentiated mounds; and Water tracks (non-incised drainages). Soils are somewhat poorly drained to moderately well drained, surface organic thickness typically ranges from thin to moderately thick, coarse fragments are absent, dominant soil texture in the upper 40 cm is typically Loamy or Organic-rich, and permafrost was common with an average active layer thickness of 48 cm ( $\pm 20$  cm). Soil pH typically ranges from acidic to circumacidic, and the average electrical conductivity is  $49 \mu\text{S}/\text{cm}$  ( $\pm 32 \mu\text{S}/\text{cm}$ ). The most common vegetation types include Closed Low Willow, Open Low Willow, and Open Tall Willow. The vegetation is dominated by *Salix pulchra*, and *Petasites frigidus* is always present in the understory at moderate to high cover. Other plant taxa that commonly occur in this plant association at low abundance include, the shrubs *Vaccinium uliginosum*, *Vaccinium vitis-idaea*, *Salix richardsonii*, and *Betula nana*; the herbs *Carex aquatilis*, *Calamagrostis canadensis*, *Arctagrostis latifolia*, and *Carex bigelowii*; and the nonvasculars *Hylocomium splendens*, *Dicranum* sp., *Peltigera aphthosa*, *Tomentypnum nitens*, and *Aulacomnium palustre*.

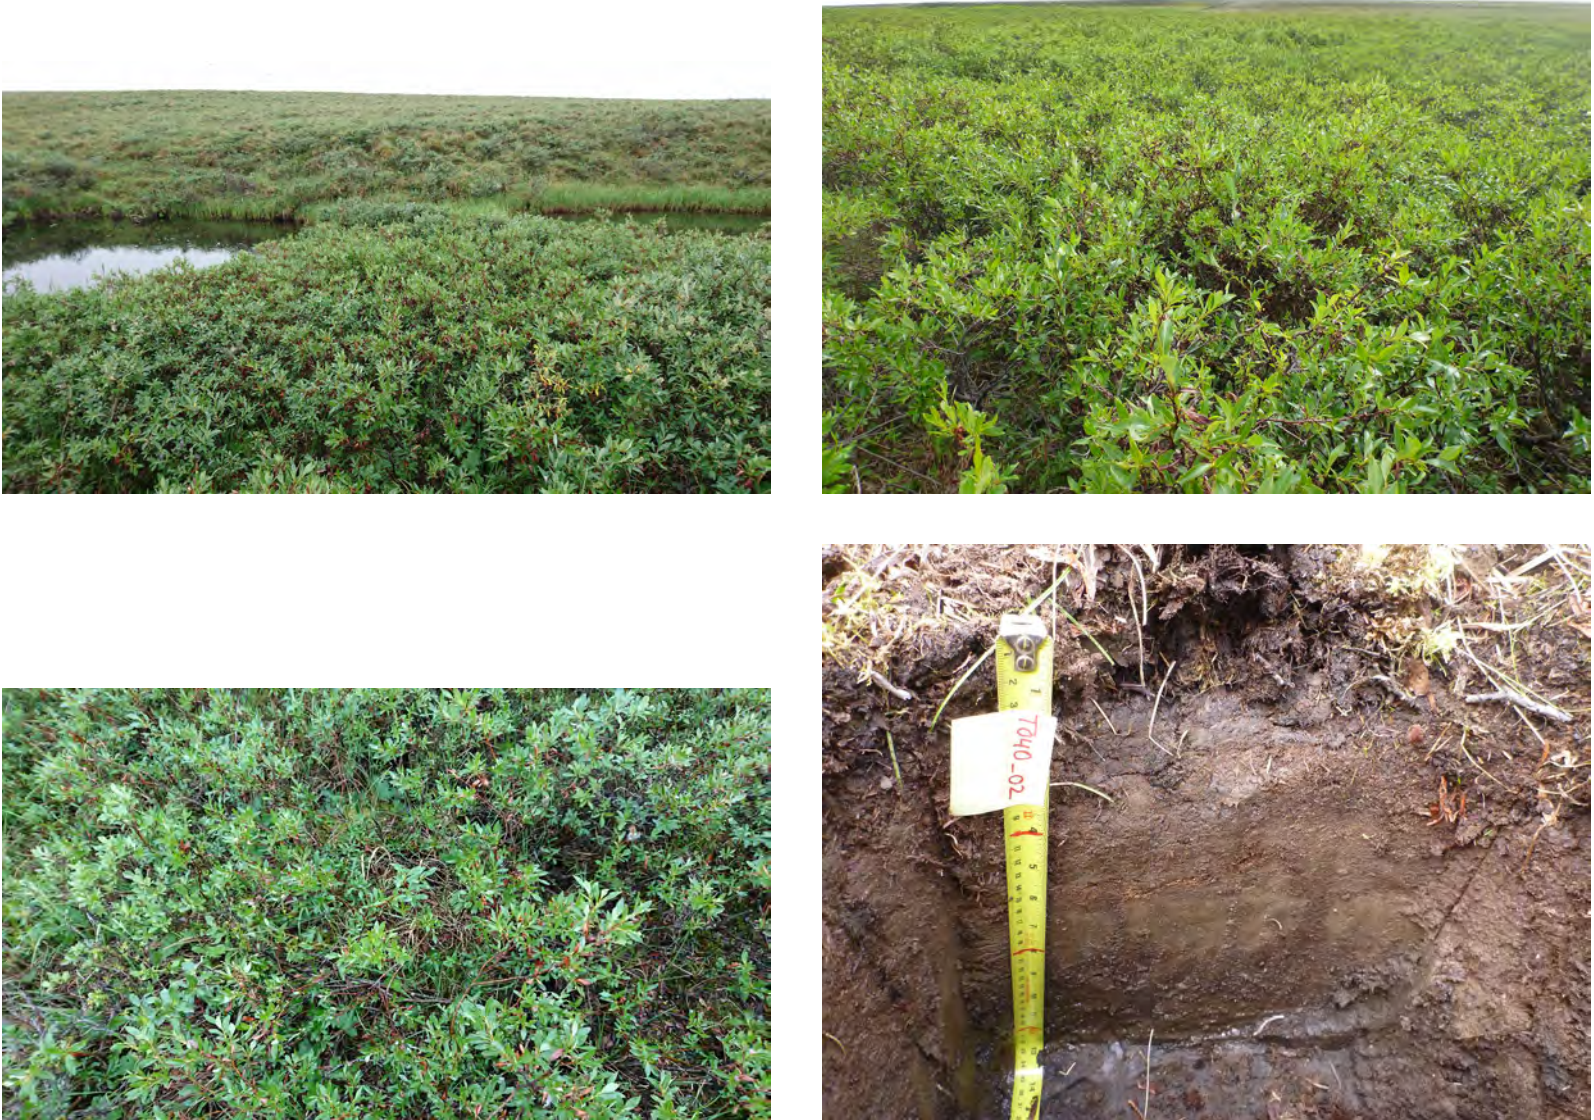

Representative photos (if available) for *Salix pulchra*/*Petasites frigidus*. Top row: landscape photos, bottom row: ground photo (left), soil photo (right).

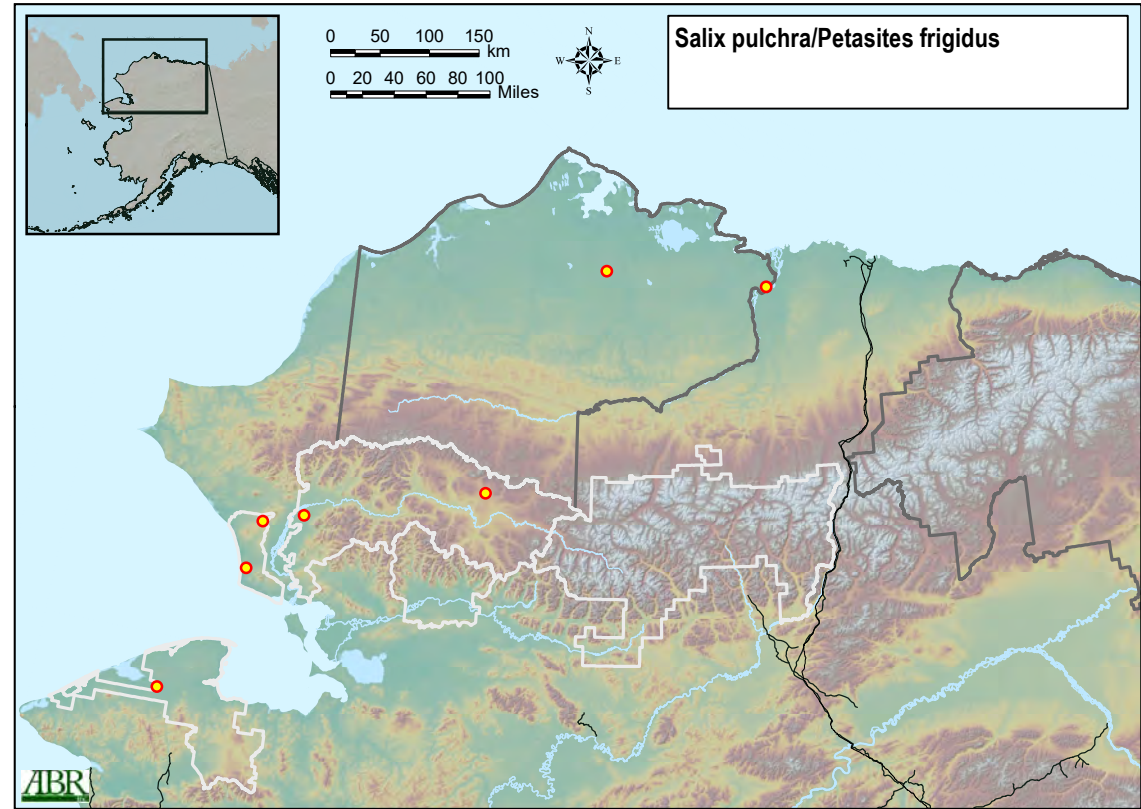

Distribution of *Salix pulchra*/*Petasites frigidus* in the study area.



SALPUL1/PETFRI: *Salix pulchra*/*Petasites frigidus*, continued

|                                   | Avg. | Std Dev. | Percentile |      |      | n |
|-----------------------------------|------|----------|------------|------|------|---|
|                                   |      |          | 10th       | 50th | 90th |   |
| Elevation (m)                     | 114  | 150      | 6          | 49   | 283  | 7 |
| Slope (degrees)                   | 2    | 4        | 0          | 1    | 5    | 7 |
| Surface Organic Thickness (cm)    | 13.9 | 10.7     | 4.0        | 13.0 | 24.2 | 7 |
| Cumul. Org. Thickness (cm)        | 16.1 | 10.9     | 6.4        | 13.0 | 29.6 | 7 |
| Depth to >15% Rock Fragments (cm) | 200  | 0        | 200        | 200  | 200  | 2 |
| Water Table Depth (cm)            | -22  | 14       | -31        | -29  | -9   | 4 |
| Active Layer Thickness (cm)       | 48   | 20       | 30         | 40   | 73   | 7 |
| Site pH                           | 5.5  | 0.4      | 5.1        | 5.6  | 5.7  | 7 |
| Electrical Conductivity (uS/cm)   | 49   | 32       | 20         | 30   | 88   | 7 |
| Whole Tussock Cover (%)           | 0    | 0        | 0          | 0    | 0    | 7 |

Environmental data summaries for *Salix pulchra*/*Petasites frigidus*.

| Lifeform         | Code   | USDA Scientific Name            | Const. | Avg. | Std Dev. | Percentile |      |      |
|------------------|--------|---------------------------------|--------|------|----------|------------|------|------|
|                  |        |                                 |        |      |          | 10th       | 50th | 90th |
| Deciduous Shrubs | BENA   | <i>Betula nana</i>              | 43     | 4.7  | 4.7      | 1.4        | 3.0  | 8.6  |
| Deciduous Shrubs | SAPU15 | <i>Salix pulchra</i>            | 100    | 67.9 | 13.2     | 53.0       | 70.0 | 82.0 |
| Deciduous Shrubs | VAUL   | <i>Vaccinium uliginosum</i>     | 57     | 5.8  | 4.9      | 1.3        | 6.0  | 10.0 |
| Forbs            | ANRI   | <i>Anemone richardsonii</i>     | 43     | 3.7  | 3.1      | 1.4        | 3.0  | 6.2  |
| Forbs            | PEFR5  | <i>Petasites frigidus</i>       | 100    | 30.3 | 27.5     | 8.8        | 20.0 | 65.0 |
| Forbs            | RUCH   | <i>Rubus chamaemorus</i>        | 43     | 5.0  | 5.0      | 1.1        | 5.0  | 9.0  |
| Grasses          | ARLA2  | <i>Arctagrostis latifolia</i>   | 57     | 5.5  | 3.7      | 2.3        | 5.0  | 9.1  |
| Grasses          | CACA4  | <i>Calamagrostis canadensis</i> | 57     | 6.5  | 6.8      | 1.0        | 5.5  | 13.2 |
| Sedges           | CABI5  | <i>Carex bigelowii</i>          | 57     | 4.8  | 6.8      | 1.0        | 1.5  | 11.1 |
| Mosses           | AUPA70 | <i>Aulacomnium palustre</i>     | 71     | 7.2  | 8.0      | 1.3        | 3.0  | 16.0 |
| Mosses           | AUTU70 | <i>Aulacomnium turgidum</i>     | 43     | 5.3  | 2.5      | 3.4        | 5.0  | 7.4  |
| Mosses           | DICRA8 | <i>Dicranum</i> sp.             | 43     | 7.7  | 4.0      | 4.4        | 10.0 | 10.0 |
| Mosses           | HYSP70 | <i>Hylocomium splendens</i>     | 86     | 16.7 | 22.9     | 2.6        | 5.0  | 42.5 |
| Mosses           | TONI70 | <i>Tomentypnum nitens</i>       | 57     | 9.3  | 6.8      | 2.9        | 10.0 | 15.0 |

Constancy and foliar cover data summaries for *Salix pulchra*/*Petasites frigidus*. Constancy/cover summaries limited to taxa occurring in this plant association with a constancy  $\geq 60$  and average cover  $> 0$ , or taxa with a constancy  $\geq 40$  and average cover  $\geq 3$ .

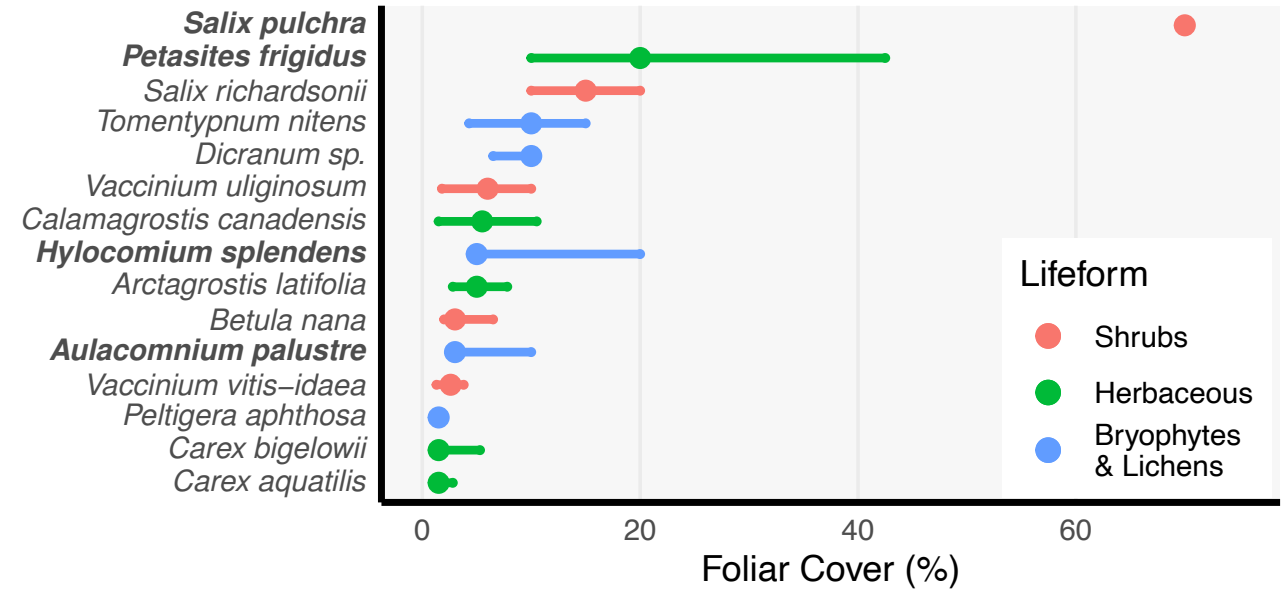

Median and 25th and 75th percentiles of foliar cover for the most common species in 3 lifeform groups in *Salix pulchra*/*Petasites frigidus*. Latin names on y-axis in bold font occur in  $\geq 70\%$  of plots in this plant association.



**SALRIC1/ARCRUB1: *Salix richardsonii*/Arctostaphylos rubra (n = 16)**

A4338: Arctic Nonacidic Low Willow Tundra Alliance

The plant association *Salix richardsonii*/Arctostaphylos rubra occurs in Lacustrine, Riverine, and Upland physiography most commonly on the following geomorphic units: Meander Active Overbank Deposit; Meander Inactive Overbank Deposit; and Delta Active Channel Deposit. The average elevation in this plant association is 78 m ( $\pm 129$  m), and the slope gradient is typically flat. This plant association was associated most commonly with the surface form Nonpatterned, but is also regularly associated with Gelifluction lobes; Scour channels-ridges; and Small dunes. Soils are somewhat poorly drained to moderately well drained, surface organic thickness typically ranges from absent to very thin, coarse fragments are uncommon, but when they do occur the average top depth is 81 cm ( $\pm 85$  cm), dominant soil texture in the upper 40 cm is typically Sandy or Loamy, and permafrost was common with an average active layer thickness of 74 cm ( $\pm 21$  cm). Soil pH typically ranges from circumalkaline to alkaline, and the average electrical conductivity is 335  $\mu$ S/cm ( $\pm 363$   $\mu$ S/cm). The most common vegetation types include Open Low Willow and Closed Low Willow. The vegetation is dominated by *Salix richardsonii*, and *Arctostaphylos rubra* is always present in the understory at moderate to high cover. Other plant taxa that commonly occur in this plant association at low abundance include, the shrubs *Salix glauca*, *Salix reticulata*, and *Dryas integrifolia*; the herbs *Polygonum viviparum*, *Valeriana capitata*, *Eurybia sibirica*, *Equisetum arvense*, and *Equisetum variegatum*; and the nonvasculars *Sanionia uncinata*, *Tomentypnum nitens*, *Campylium stellatum*, *Distichium capillaceum*, and *Catoscopium nigrum*.

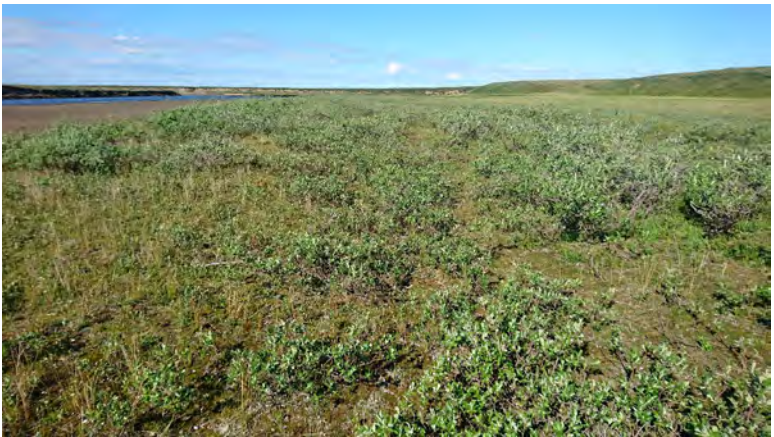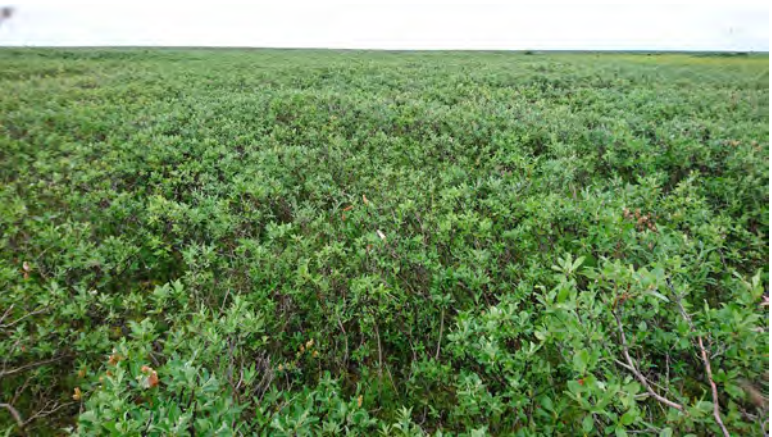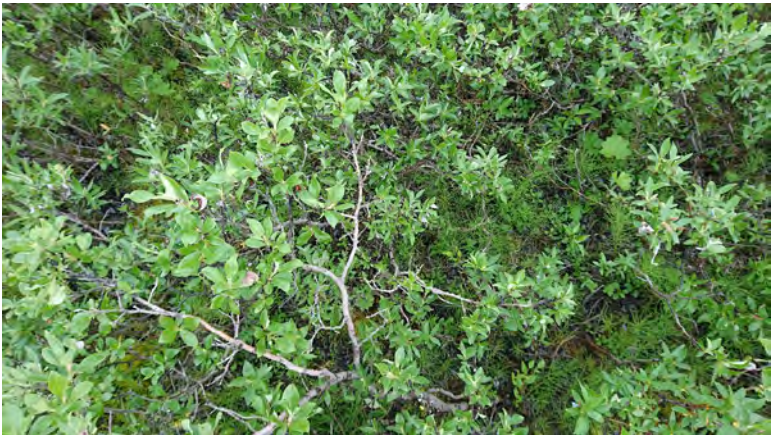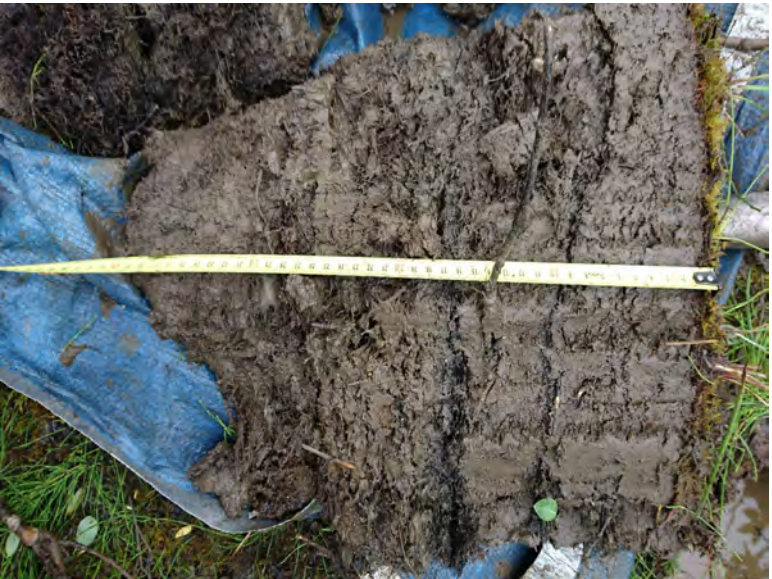

Representative photos (if available) for *Salix richardsonii*/Arctostaphylos rubra. Top row: landscape photos, bottom row: ground photo (left), soil photo (right).

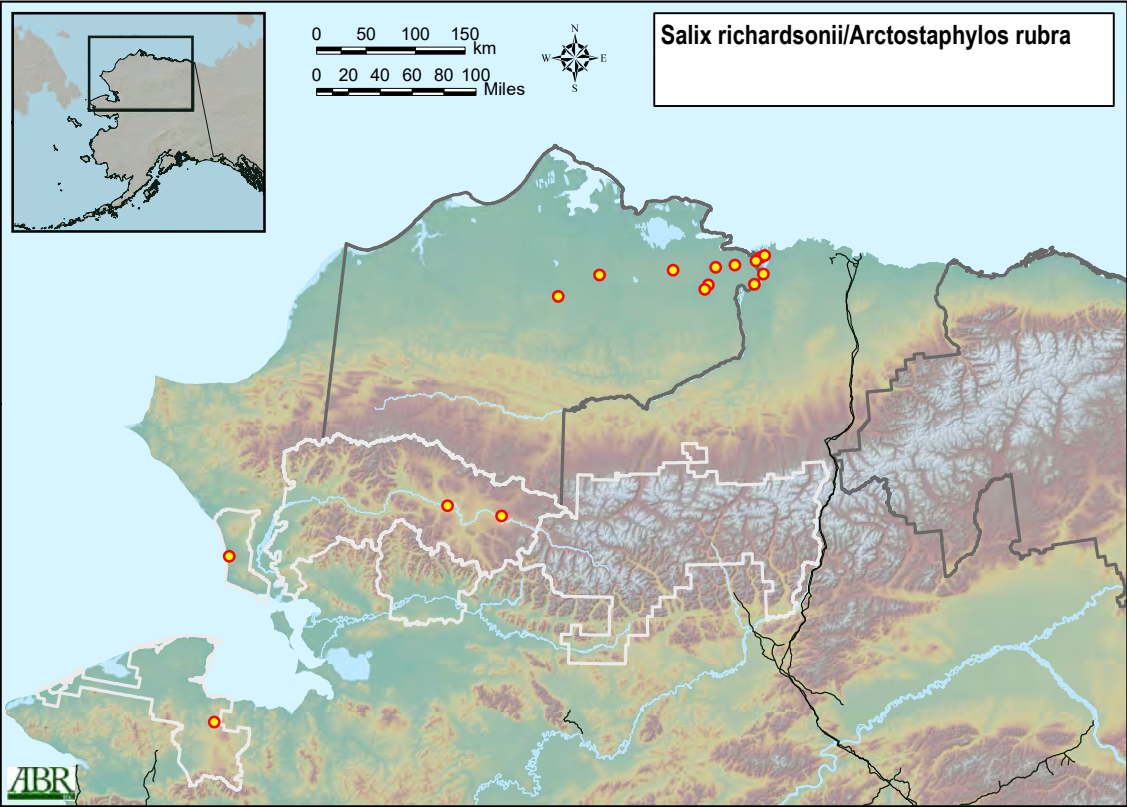

Distribution of *Salix richardsonii*/Arctostaphylos rubra in the study area.



SALRIC1/ARCRUB1: *Salix richardsonii*/Arctostaphylos rubra, continued

|                                   | Avg. | Std Dev. | Percentile |      |      | n  |
|-----------------------------------|------|----------|------------|------|------|----|
|                                   |      |          | 10th       | 50th | 90th |    |
| Elevation (m)                     | 78   | 129      | 6          | 15   | 236  | 13 |
| Slope (degrees)                   | 1    | 3        | 0          | 0    | 1    | 12 |
| Surface Organic Thickness (cm)    | 2.5  | 2.8      | 0.0        | 1.3  | 5.0  | 16 |
| Cumul. Org. Thickness (cm)        | 5.7  | 4.3      | 1.0        | 5.0  | 11.6 | 13 |
| Depth to >15% Rock Fragments (cm) | 81   | 85       | 20         | 51   | 165  | 4  |
| Water Table Depth (cm)            | -27  | 6        | -31        | -28  | -21  | 6  |
| Active Layer Thickness (cm)       | 74   | 21       | 47         | 77   | 99   | 10 |
| Site pH                           | 7.5  | 0.3      | 7.2        | 7.5  | 7.9  | 15 |
| Electrical Conductivity (uS/cm)   | 335  | 363      | 84         | 200  | 924  | 15 |
| Whole Tussock Cover (%)           | 0    | 0        | 0          | 0    | 0    | 11 |

Environmental data summaries for *Salix richardsonii*/Arctostaphylos rubra.

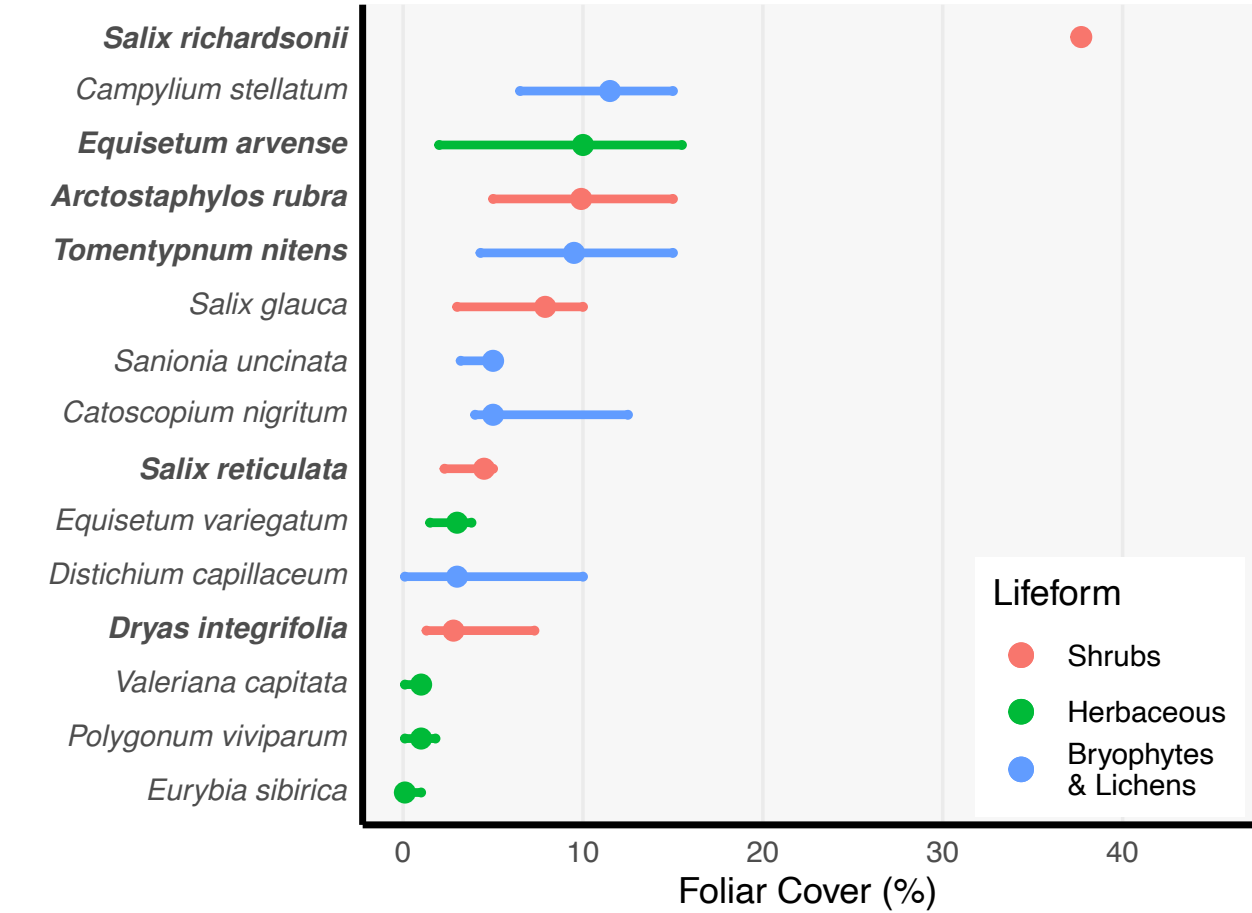

Median and 25th and 75th percentiles of foliar cover for the most common species in 3 lifeform groups in *Salix richardsonii*/Arctostaphylos rubra. Latin names on y-axis in bold font occur in ≥70% of plots in this plant association.

| Lifeform         | Code   | USDA Scientific Name         | Const. | Avg. | Std Dev. | Percentile |      |      |
|------------------|--------|------------------------------|--------|------|----------|------------|------|------|
|                  |        |                              |        |      |          | 10th       | 50th | 90th |
| Deciduous Shrubs | ARRU   | <i>Arctostaphylos rubra</i>  | 100    | 13.2 | 13.9     | 3.5        | 9.9  | 21.0 |
| Deciduous Shrubs | SAGL   | <i>Salix glauca</i>          | 56     | 7.4  | 4.3      | 2.8        | 7.9  | 11.0 |
| Deciduous Shrubs | SARE2  | <i>Salix reticulata</i>      | 88     | 9.6  | 15.9     | 1.0        | 4.5  | 22.0 |
| Deciduous Shrubs | SARI4  | <i>Salix richardsonii</i>    | 100    | 41.1 | 16.7     | 22.5       | 37.7 | 57.5 |
| Evergreen Shrubs | DRIN4  | <i>Dryas integrifolia</i>    | 88     | 4.8  | 5.5      | 0.1        | 2.8  | 10.0 |
| Forbs            | ASAL7  | <i>Astragalus alpinus</i>    | 44     | 4.1  | 4.9      | 1.0        | 2.0  | 8.8  |
| Forbs            | ASUM2  | <i>Astragalus umbellatus</i> | 56     | 3.8  | 7.1      | 0.1        | 1.0  | 9.2  |
| Forbs            | EUSI13 | <i>Eurybia sibirica</i>      | 63     | 1.0  | 0.9      | 0.1        | 0.1  | 1.2  |
| Forbs            | POVI3  | <i>Polygonum viviparum</i>   | 63     | 1.3  | 1.5      | 0.1        | 1.0  | 4.0  |
| Forbs            | VACA3  | <i>Valeriana capitata</i>    | 63     | 1.0  | 0.6      | 0.1        | 1.0  | 1.1  |
| Ferns & Allies   | EQAR   | <i>Equisetum arvense</i>     | 75     | 9.6  | 7.3      | 1.1        | 10.0 | 17.9 |
| Ferns & Allies   | EQVA   | <i>Equisetum variegatum</i>  | 63     | 3.4  | 3.0      | 1.0        | 3.0  | 5.6  |
| Mosses           | TONI70 | <i>Tomentypnum nitens</i>    | 75     | 13.2 | 14.6     | 1.1        | 9.5  | 37.5 |

Constancy and foliar cover data summaries for *Salix richardsonii*/Arctostaphylos rubra. Constancy/cover summaries limited to taxa occurring in this plant association with a constancy ≥60 and average cover >0, or taxa with a constancy ≥40 and average cover ≥3.



**SALRIC1/CARAQU1–ERIAN1: *Salix richardsonii*/*Carex aquatilis*–*Eriophorum angustifolium* (n = 23)**

The plant association *Salix richardsonii*/*Carex aquatilis*–*Eriophorum angustifolium* occurs in Lacustrine, Lowland, and Riverine physiography most commonly on the following geomorphic units: Delta Inactive Overbank Deposit; Meander Inactive Overbank Deposit; and Delta Active Overbank Deposit. The average elevation in this plant association is 12m ( $\pm 10$ m), and the slope gradient is typically flat. This plant association was associated most commonly with the surface form Disjunct Polygon Rims, but is also regularly associated with Nonpatterned; Low-centered, Low-relief, Low-density Polygons; and Hummocks. Soils are very poorly drained to somewhat poorly drained, surface organic thickness typically ranges from very thin to moderately thick, coarse fragments are uncommon, but when they do occur the average top depth is 82 cm ( $\pm 73$ cm), and permafrost was common with an average active layer thickness of 50 cm ( $\pm 11$ cm). Water pH typically ranges from circumacidic to circumalkaline, and the average electrical conductivity is 550  $\mu$ S/cm ( $\pm 480$   $\mu$ S/cm). The most common vegetation types include Open Low Willow-Sedge Shrub Tundra, Open Low Willow, and Wet Sedge-Willow Tundra. The vegetation is dominated by *Salix richardsonii*, which typically forms an open low shrub canopy, and *Carex aquatilis* and *Eriophorum angustifolium* co-dominate in the herbaceous layer. Other plant taxa that commonly occur in this plant association at low abundance include, the shrubs *Dryas integrifolia*, *Salix reticulata*, *Salix pulchra*, and *Arctostaphylos rubra*; the herbs *Saxifraga hirculus*, *Poa arctica*, and *Polygonum viviparum*; and the non-vasculars *Tomentypnum nitens*, *Campylium stellatum*, *Hylocomium splendens*, *Aulacomnium turgidum*, and *Aulacomnium palustre*. The soils in this plant association range from wet to flooded, and dwarf shrubs are generally limited to moist micro-highs.

A4367p: Arctic Minerotrophic Wet Low Shrublands (proposed)

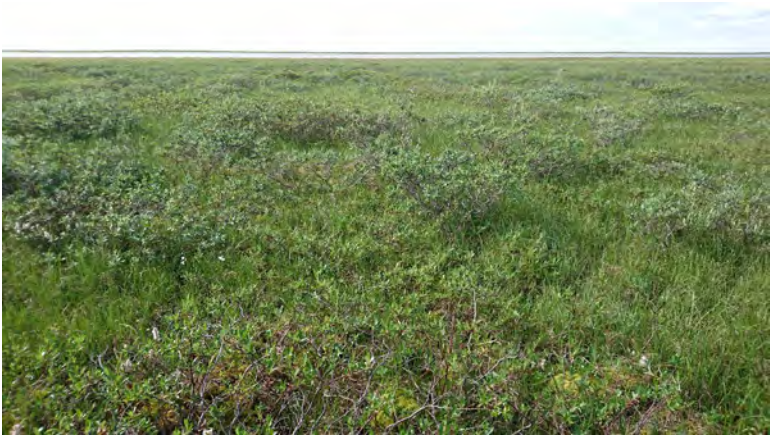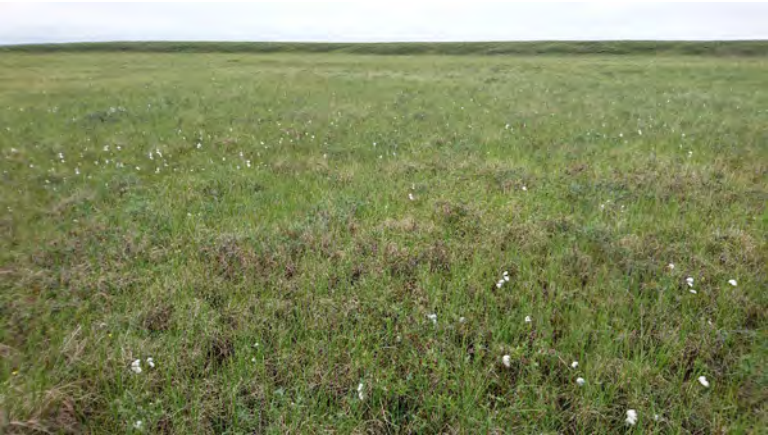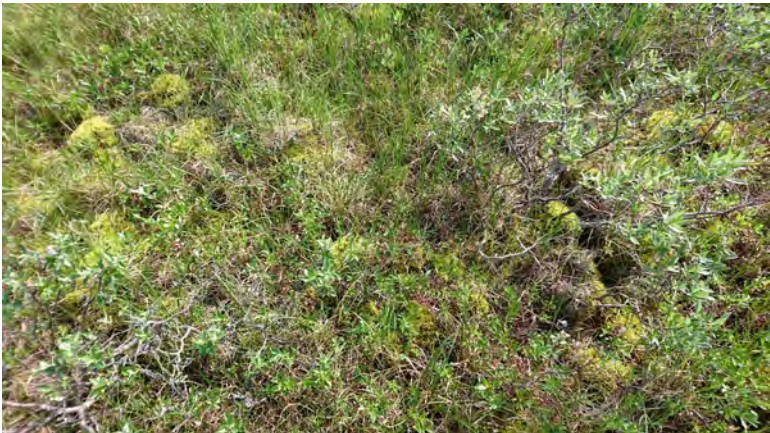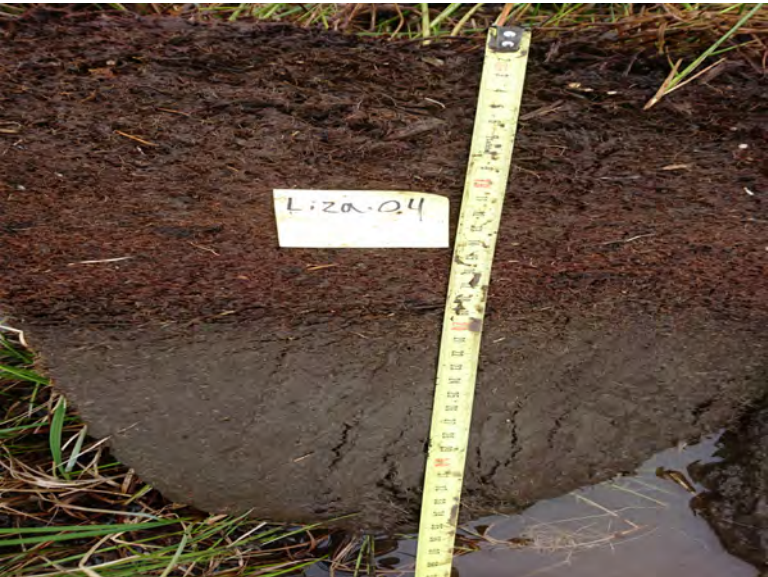

Representative photos (if available) for *Salix richardsonii*/*Carex aquatilis*–*Eriophorum angustifolium*. Top row: landscape photos, bottom row: ground photo (left), soil photo (right).

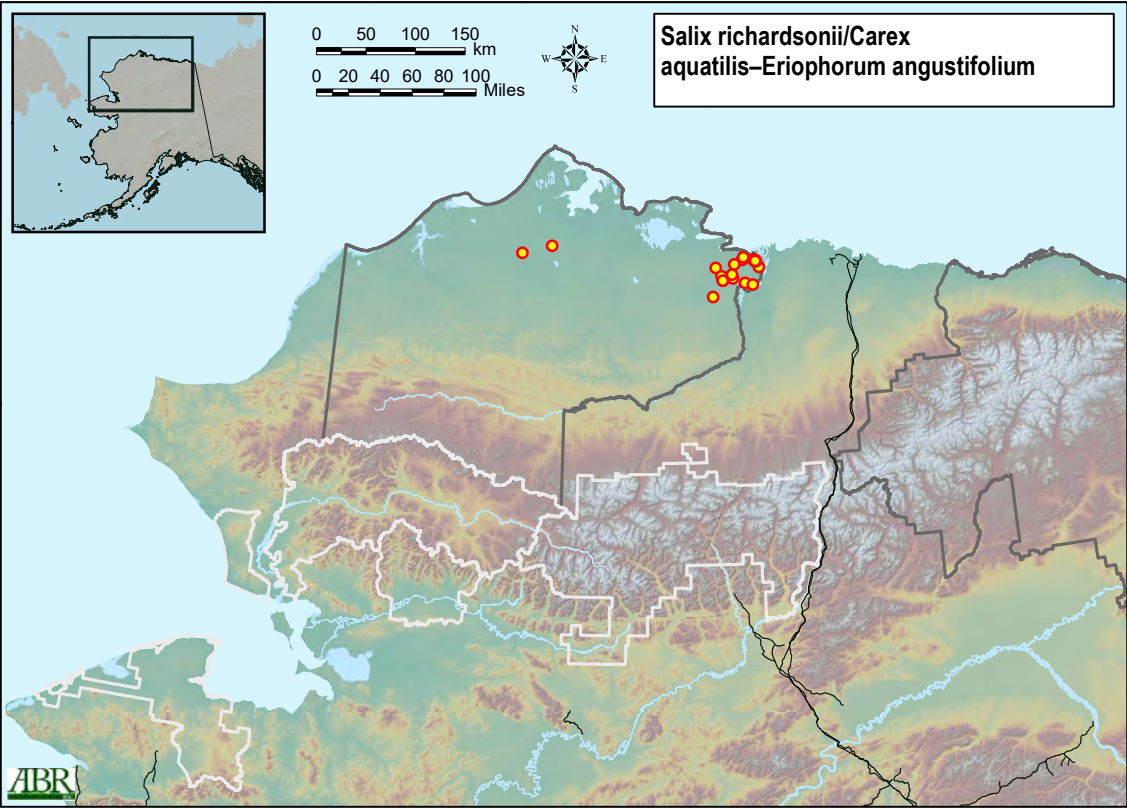

Distribution of *Salix richardsonii*/*Carex aquatilis*–*Eriophorum angustifolium* in the study area.



SALRIC1/CARAQU1–ERIAN1: *Salix richardsonii*/*Carex aquatilis*–*Eriophorum angustifolium*, continued

|                                   | Avg. | Std Dev. | Percentile |      |      | n  |
|-----------------------------------|------|----------|------------|------|------|----|
|                                   |      |          | 10th       | 50th | 90th |    |
| Elevation (m)                     | 12   | 10       | 1          | 9    | 27   | 23 |
| Slope (degrees)                   | 0    | 1        | 0          | 0    | 1    | 23 |
| Surface Organic Thickness (cm)    | 12.2 | 12.1     | 0.0        | 12.0 | 30.0 | 23 |
| Cumul. Org. Thickness (cm)        | 17.7 | 11.6     | 5.2        | 15.0 | 33.0 | 23 |
| Depth to >15% Rock Fragments (cm) | 82   | 73       | 33         | 59   | 154  | 6  |
| Water Table Depth (cm)            | -19  | 13       | -37        | -20  | 0    | 17 |
| Active Layer Thickness (cm)       | 50   | 11       | 37         | 51   | 61   | 15 |
| Site pH                           | 6.5  | 0.4      | 5.8        | 6.6  | 7.1  | 23 |
| Electrical Conductivity (uS/cm)   | 550  | 480      | 140        | 460  | 988  | 23 |
| Whole Tussock Cover (%)           | 0    | 1        | 0          | 0    | 1    | 12 |

Environmental data summaries for *Salix richardsonii*/*Carex aquatilis*–*Eriophorum angustifolium*.

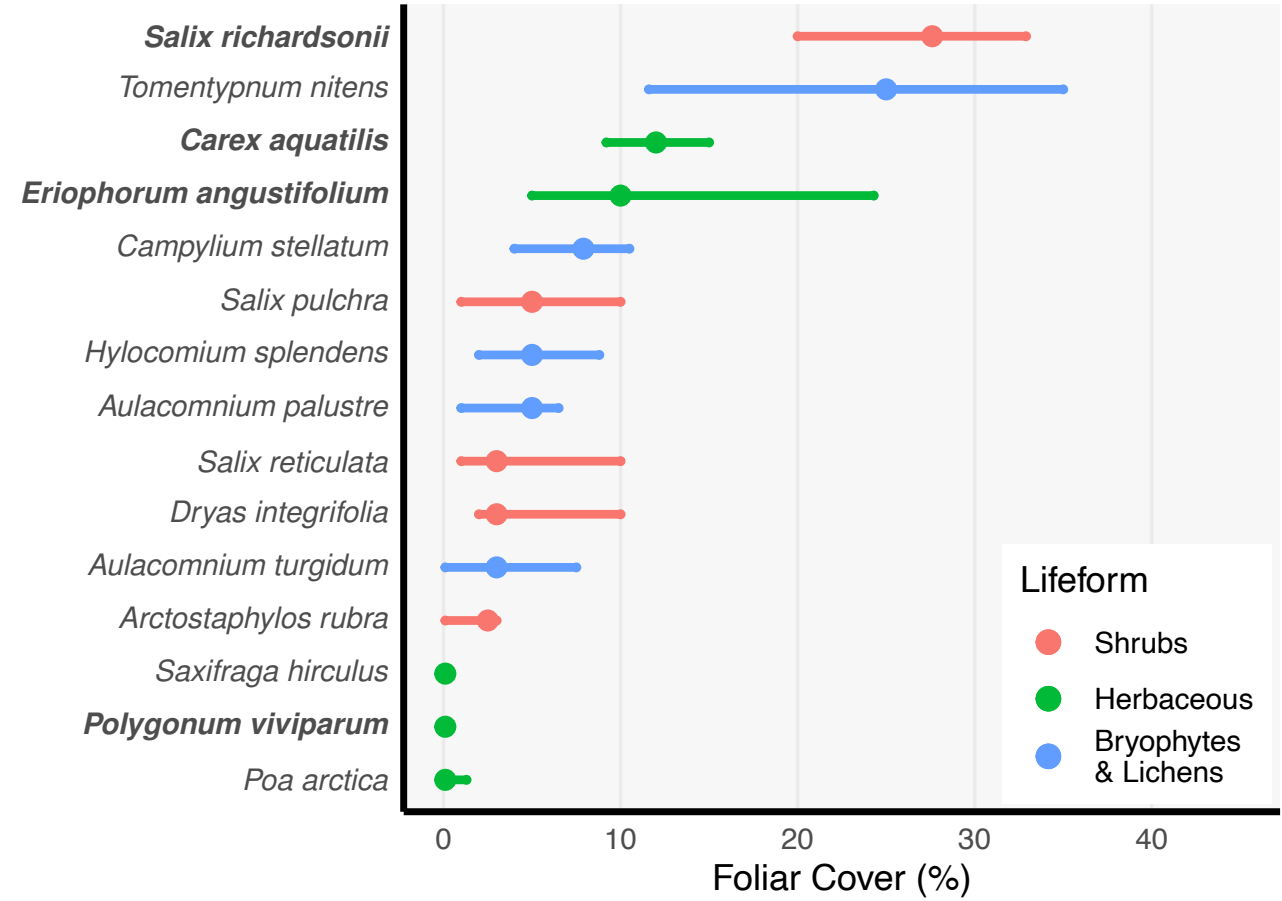

Median and 25th and 75th percentiles of foliar cover for the most common species in 3 lifeform groups in *Salix richardsonii*/*Carex aquatilis*–*Eriophorum angustifolium*. Latin names on y-axis in bold font occur in ≥70% of plots in this plant association.

| Lifeform         | Code   | USDA Scientific Name            | Const. | Avg. | Std Dev. | Percentile |      |      |
|------------------|--------|---------------------------------|--------|------|----------|------------|------|------|
|                  |        |                                 |        |      |          | 10th       | 50th | 90th |
| Deciduous Shrubs | SAPU15 | <i>Salix pulchra</i>            | 43     | 7.1  | 7.7      | 0.1        | 5.0  | 15.9 |
| Deciduous Shrubs | SARE2  | <i>Salix reticulata</i>         | 70     | 4.9  | 4.7      | 1.0        | 3.0  | 10.0 |
| Deciduous Shrubs | SARI4  | <i>Salix richardsonii</i>       | 100    | 28.0 | 7.5      | 20.0       | 27.6 | 38.7 |
| Evergreen Shrubs | DRIN4  | <i>Dryas integrifolia</i>       | 57     | 7.5  | 8.7      | 0.1        | 3.0  | 17.2 |
| Forbs            | POVI3  | <i>Polygonum viviparum</i>      | 74     | 0.1  | 0.3      | 0.1        | 0.1  | 0.1  |
| Forbs            | SAHI3  | <i>Saxifraga hirculus</i>       | 70     | 0.1  | 0.8      | 0.1        | 0.1  | 1.3  |
| Ferns & Allies   | EQVA   | <i>Equisetum variegatum</i>     | 43     | 5.7  | 6.6      | 1.0        | 2.6  | 11.2 |
| Sedges           | CAAQ   | <i>Carex aquatilis</i>          | 100    | 15.0 | 11.2     | 5.2        | 12.0 | 33.0 |
| Sedges           | ERAN6  | <i>Eriophorum angustifolium</i> | 100    | 16.0 | 12.7     | 3.4        | 10.0 | 35.8 |
| Mosses           | AUPA70 | <i>Aulacomnium palustre</i>     | 48     | 11.0 | 22.0     | 0.1        | 5.0  | 20.0 |
| Mosses           | AUTU70 | <i>Aulacomnium turgidum</i>     | 48     | 4.6  | 5.1      | 0.1        | 3.0  | 10.0 |
| Mosses           | HYSP70 | <i>Hylocomium splendens</i>     | 43     | 5.1  | 3.7      | 1.3        | 5.0  | 10.0 |
| Mosses           | TONI70 | <i>Tomentypnum nitens</i>       | 65     | 26.2 | 19.6     | 5.0        | 25.0 | 56.0 |

Constancy and foliar cover data summaries for *Salix richardsonii*/*Carex aquatilis*–*Eriophorum angustifolium*. Constancy/cover summaries limited to taxa occurring in this plant association with a constancy ≥60 and average cover >0, or taxa with a constancy ≥40 and average cover ≥3.



**SALRIC1/EQUARV–FESALT: *Salix richardsonii*/*Equisetum arvense*–*Festuca altaica* (n = 5)**

A4338: Arctic Nonacidic Low Willow Tundra Alliance

The plant association *Salix richardsonii*/*Equisetum arvense*–*Festuca altaica* occurs in Upland physiography on the following geomorphic unit: Hillside Colluvium. The average elevation in this plant association is 358 m ( $\pm 230$  m), and the slope gradient typically ranges between gently sloping and strongly sloping. This plant association was associated most commonly with the surface form Gelifluction lobes, but is also regularly associated with Hummocks; Mounds caused by wildlife; and Stripes (non-sorted, sorted). Soils are somewhat poorly drained to moderately well drained, surface organic thickness typically ranges from very thin to thin, coarse fragments are common with an average top depth of 81 cm ( $\pm 68$  cm), dominant soil texture in the upper 40 cm is typically Loamy, and permafrost was common with an average active layer thickness of 44 cm ( $\pm 6$  cm). Soil pH typically ranges from circumalkaline to alkaline, and the average electrical conductivity is 236  $\mu\text{S}/\text{cm}$  ( $\pm 157 \mu\text{S}/\text{cm}$ ). The most common vegetation types include Open Low Willow and Open Tall Willow. The vegetation is dominated by *Salix richardsonii*, which typically forms an open low shrub canopy. *Equisetum arvense* dominates the forb layer, with *Festuca altaica* always present at low to moderate cover. Other plant taxa that commonly occur in this plant association at low abundance include, the shrubs *Vaccinium uliginosum*, *Salix reticulata*, *Salix pulchra*, and *Cassiope tetragona*; the herbs *Polemonium acutiflorum*, *Trisetum spicatum*, and *Valeriana capitata*; and the nonvasculars *Hylacomium splendens*, *Cladonia* sp., *Aulacomnium palustre*, *Dicranum* sp., and *Tomentypnum nitens*.

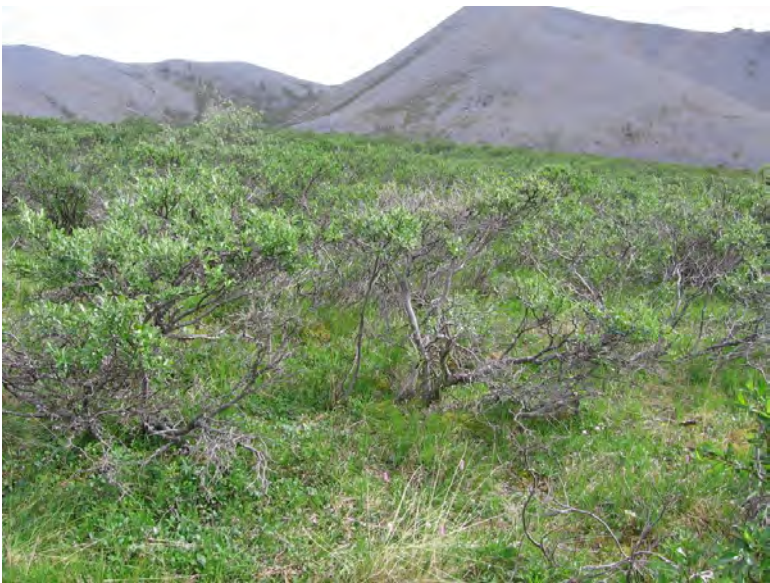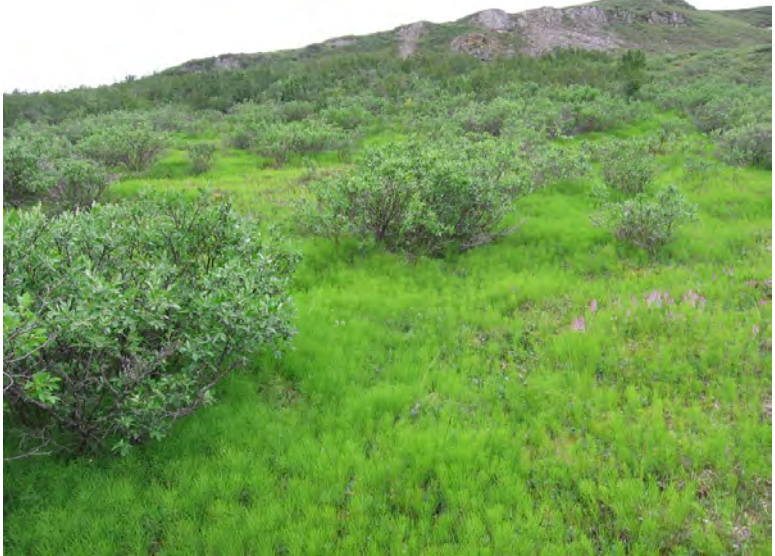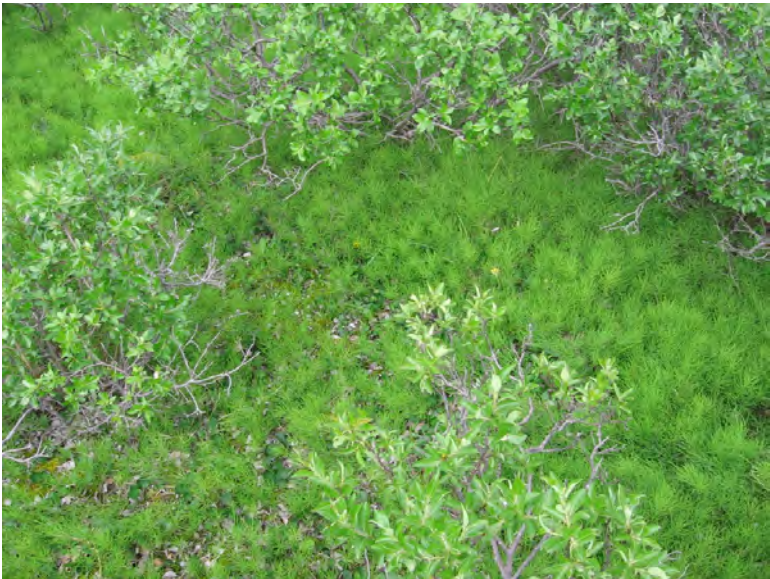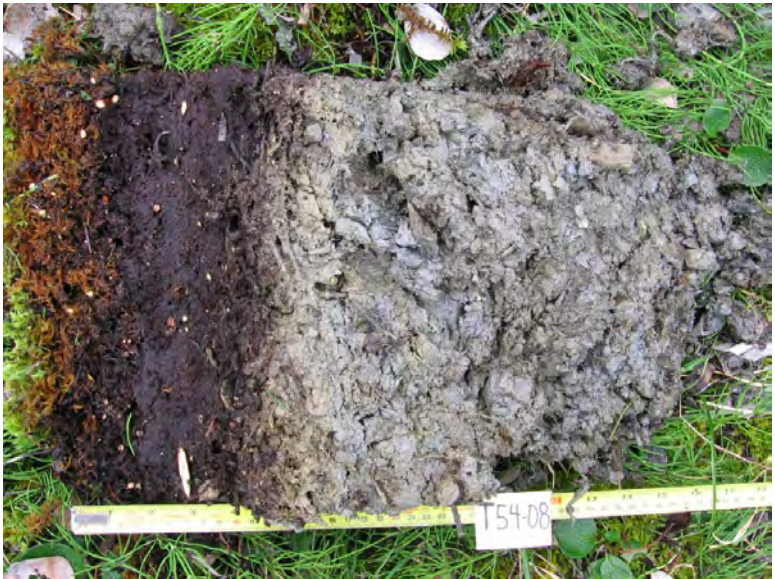

Representative photos (if available) for *Salix richardsonii*/*Equisetum arvense*–*Festuca altaica*. Top row: landscape photos, bottom row: ground photo (left), soil photo (right).

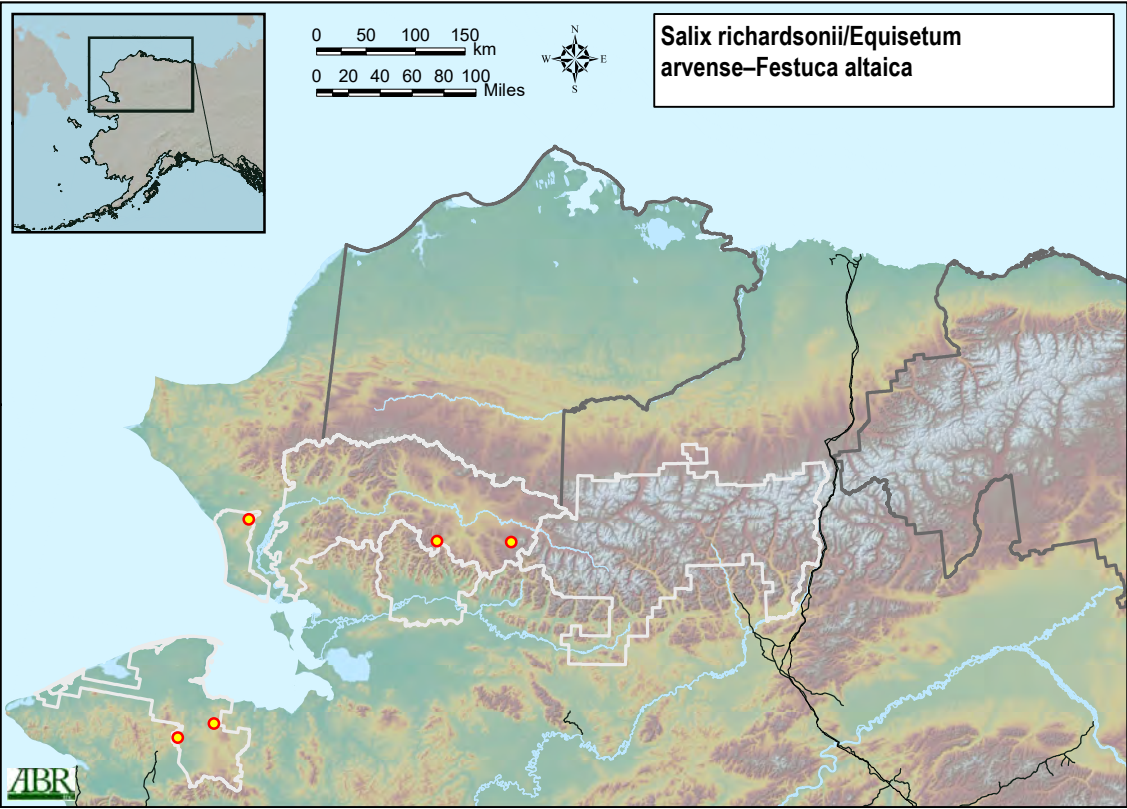

Distribution of *Salix richardsonii*/*Equisetum arvense*–*Festuca altaica* in the study area.



SALRIC1/EQUARV–FESALT: *Salix richardsonii*/*Equisetum arvense*–*Festuca altaica*, continued

|                                   | Avg. | Std Dev. | Percentile |      |      | n |
|-----------------------------------|------|----------|------------|------|------|---|
|                                   |      |          | 10th       | 50th | 90th |   |
| Elevation (m)                     | 358  | 230      | 171        | 274  | 611  | 5 |
| Slope (degrees)                   | 8    | 3        | 4          | 10   | 11   | 5 |
| Surface Organic Thickness (cm)    | 6.0  | 3.2      | 3.4        | 5.0  | 9.4  | 5 |
| Cumul. Org. Thickness (cm)        | 7.6  | 2.9      | 4.8        | 7.0  | 10.6 | 5 |
| Depth to >15% Rock Fragments (cm) | 81   | 68       | 37         | 64   | 146  | 5 |
| Water Table Depth (cm)            | -21  | 16       | -35        | -14  | -11  | 3 |
| Active Layer Thickness (cm)       | 44   | 6        | 41         | 44   | 47   | 2 |
| Site pH                           | 7.2  | 0.5      | 6.7        | 7.2  | 7.7  | 5 |
| Electrical Conductivity (uS/cm)   | 236  | 157      | 92         | 200  | 404  | 5 |
| Whole Tussock Cover (%)           | 0    | 0        | 0          | 0    | 0    | 5 |

Environmental data summaries for *Salix richardsonii*/*Equisetum arvense*–*Festuca altaica*.

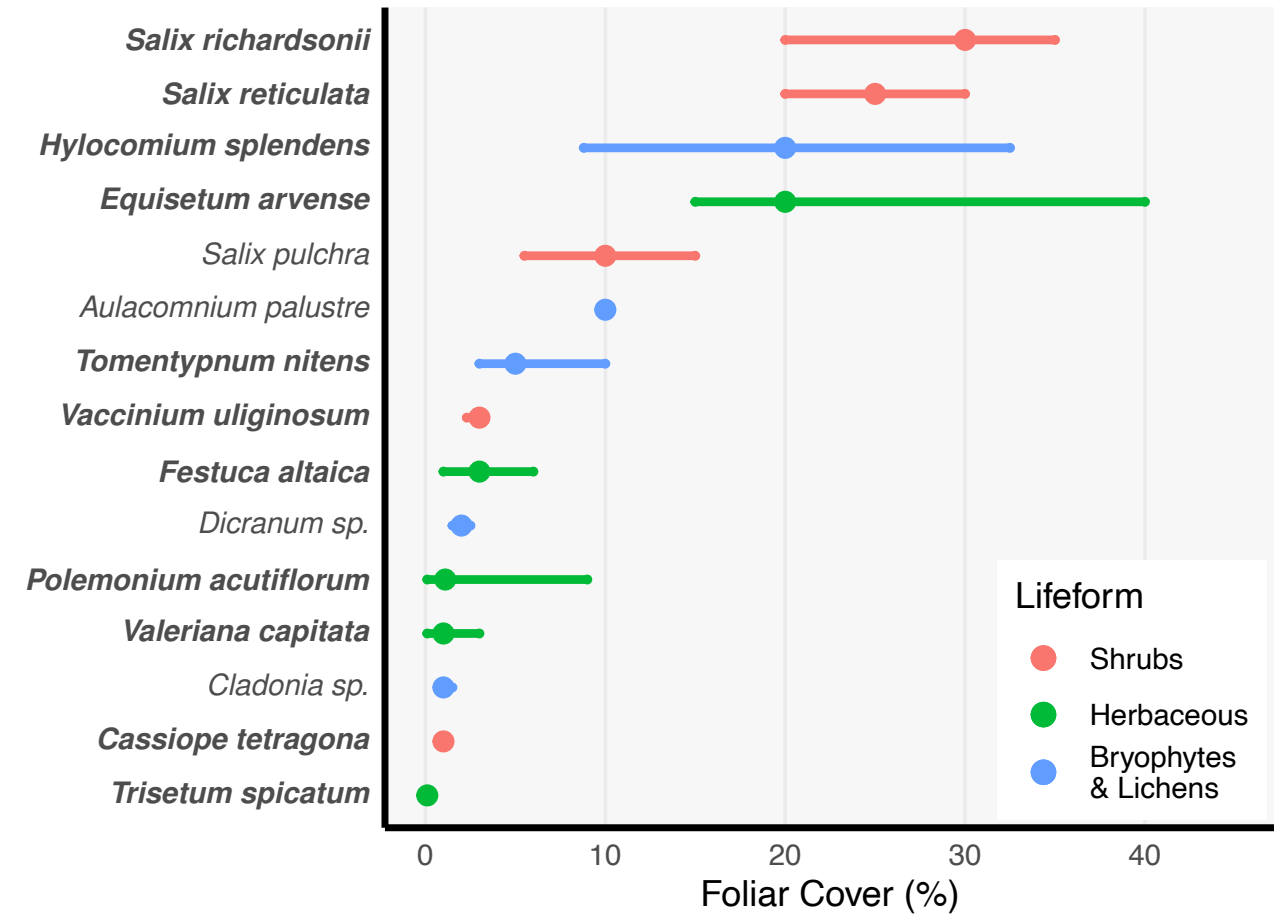

Median and 25th and 75th percentiles of foliar cover for the most common species in 3 lifeform groups in *Salix richardsonii*/*Equisetum arvense*–*Festuca altaica*. Latin names on y-axis in bold font occur in ≥70% of plots in this plant association.

| Lifeform         | Code   | USDA Scientific Name          | Const. | Avg. | Std Dev. | Percentile |      |      |
|------------------|--------|-------------------------------|--------|------|----------|------------|------|------|
|                  |        |                               |        |      |          | 10th       | 50th | 90th |
| Deciduous Shrubs | ARRU   | <i>Arctostaphylos rubra</i>   | 60     | 4.0  | 1.7      | 2.6        | 5.0  | 5.0  |
| Deciduous Shrubs | BENA   | <i>Betula nana</i>            | 40     | 3.0  | 2.8      | 1.4        | 3.0  | 4.6  |
| Deciduous Shrubs | SAGL   | <i>Salix glauca</i>           | 40     | 17.5 | 10.6     | 11.5       | 17.5 | 23.5 |
| Deciduous Shrubs | SAPU15 | <i>Salix pulchra</i>          | 60     | 10.3 | 9.5      | 2.8        | 10.0 | 18.0 |
| Deciduous Shrubs | SARE2  | <i>Salix reticulata</i>       | 100    | 26.0 | 9.6      | 17.0       | 25.0 | 36.0 |
| Deciduous Shrubs | SARI4  | <i>Salix richardsonii</i>     | 100    | 33.0 | 16.4     | 20.0       | 30.0 | 50.0 |
| Deciduous Shrubs | VAUL   | <i>Vaccinium uliginosum</i>   | 80     | 2.5  | 1.7      | 1.0        | 3.0  | 3.7  |
| Evergreen Shrubs | CATE11 | <i>Cassiope tetragona</i>     | 80     | 1.0  | 0.5      | 0.1        | 1.0  | 1.0  |
| Evergreen Shrubs | DRIN4  | <i>Dryas integrifolia</i>     | 40     | 17.5 | 3.5      | 15.5       | 17.5 | 19.5 |
| Evergreen Shrubs | DROC   | <i>Dryas octopetala</i>       | 40     | 10.0 | 7.1      | 6.0        | 10.0 | 14.0 |
| Forbs            | ANPA   | <i>Anemone parviflora</i>     | 60     | 4.0  | 5.2      | 1.0        | 1.0  | 8.2  |
| Forbs            | DOFR   | <i>Dodecatheon frigidum</i>   | 60     | 4.0  | 2.6      | 1.8        | 5.0  | 5.8  |
| Forbs            | HEAL   | <i>Hedysarum alpinum</i>      | 40     | 4.5  | 4.9      | 1.7        | 4.5  | 7.3  |
| Forbs            | PEFR5  | <i>Petasites frigidus</i>     | 40     | 5.1  | 7.0      | 1.1        | 5.1  | 9.0  |
| Forbs            | POAC   | <i>Polemonium acutiflorum</i> | 80     | 8.1  | 14.7     | 0.1        | 1.1  | 21.6 |
| Forbs            | POVI3  | <i>Polygonum viviparum</i>    | 60     | 0.1  | 0.5      | 0.1        | 0.1  | 1.0  |
| Forbs            | VACA3  | <i>Valeriana capitata</i>     | 100    | 2.8  | 4.2      | 0.1        | 1.0  | 7.2  |
| Ferns & Allies   | EQAR   | <i>Equisetum arvense</i>      | 100    | 35.0 | 29.8     | 15.0       | 20.0 | 67.0 |
| Ferns & Allies   | EQSC   | <i>Equisetum scirpoides</i>   | 60     | 0.1  | 0.5      | 0.1        | 0.1  | 1.0  |
| Grasses          | FEAL   | <i>Festuca altaica</i>        | 100    | 9.2  | 14.6     | 1.0        | 3.0  | 23.4 |
| Grasses          | TRSP2  | <i>Trisetum spicatum</i>      | 80     | 0.1  | 0.5      | 0.1        | 0.1  | 1.0  |
| Sedges           | CABI5  | <i>Carex bigelowii</i>        | 60     | 3.7  | 1.5      | 2.4        | 4.0  | 4.8  |
| Sedges           | CASC10 | <i>Carex scirpoidea</i>       | 60     | 1.0  | 1.0      | 0.1        | 1.0  | 1.8  |
| Mosses           | AUPA70 | <i>Aulacomnium palustre</i>   | 40     | 10.0 | 0.0      | 10.0       | 10.0 | 10.0 |
| Mosses           | HYSP70 | <i>Hylocomium splendens</i>   | 80     | 21.3 | 16.5     | 6.5        | 20.0 | 37.0 |
| Mosses           | TONI70 | <i>Tomentypnum nitens</i>     | 100    | 12.0 | 16.0     | 2.4        | 5.0  | 28.0 |
| Lichens          | CLADO3 | <i>Cladonia sp.</i>           | 60     | 1.0  | 1.0      | 0.1        | 1.0  | 1.8  |

Constancy and foliar cover data summaries for *Salix richardsonii*/*Equisetum arvense*–*Festuca altaica*. Constancy/cover summaries limited to taxa occurring in this plant association with a constancy ≥60 and average cover >0, or taxa with a constancy ≥40 and average cover ≥3.



**SALRIC1/EQUARV–PETFRI: *Salix richardsonii*/*Equisetum arvense*–*Petasites frigidus* (n = 13)**

A4338: Arctic Nonacidic Low Willow Tundra Alliance

The plant association *Salix richardsonii*/*Equisetum arvense*–*Petasites frigidus* occurs in Riverine and Upland physiography most commonly on the following geomorphic units: Delta Active Overbank Deposit; Delta Active Channel Deposit; and Lowland Headwater Floodplain Channel Deposit. The average elevation in this plant association is 143 m ( $\pm 183$  m), and the slope gradient typically ranges between flat and gently sloping. This plant association was associated most commonly with the surface form Nonpatterned, but is also regularly associated with Hummocks and Scour channels-ridges. Soils are somewhat poorly drained to moderately well drained, surface organic thickness typically ranges from absent to thin, coarse fragments are uncommon, but when they do occur the average top depth is 29 cm ( $\pm 23$  cm), dominant soil texture in the upper 40 cm is typically Loamy or Gravelly, and permafrost was common with an average active layer thickness of 85 cm ( $\pm 23$  cm). Soil pH typically ranges from circumalkaline to alkaline, and the average electrical conductivity is 240  $\mu$ S/cm ( $\pm 159$   $\mu$ S/cm). The most common vegetation types include Open Low Willow, Closed Tall Willow, and Closed Low Willow. The vegetation is dominated by *Salix richardsonii*, which typically forms an open low shrub canopy. *Equisetum arvense* dominates the forb layer, with *Petasites frigidus* always present at low to moderate cover. Other plant taxa that commonly occur in this plant association at low abundance include, the shrubs *Salix alaxensis*, *Salix pulchra*, *Arctostaphylos rubra*, and *Salix reticulata*; the herbs *Polygonum viviparum*, *Arctagrostis latifolia*, and *Valeriana capitata*; and the nonvasculars *Hylocomium splendens*, *Sanionia uncinata*, *Brachythecium* sp., *Tomentypnum nitens*, and *Campylium stellatum*.

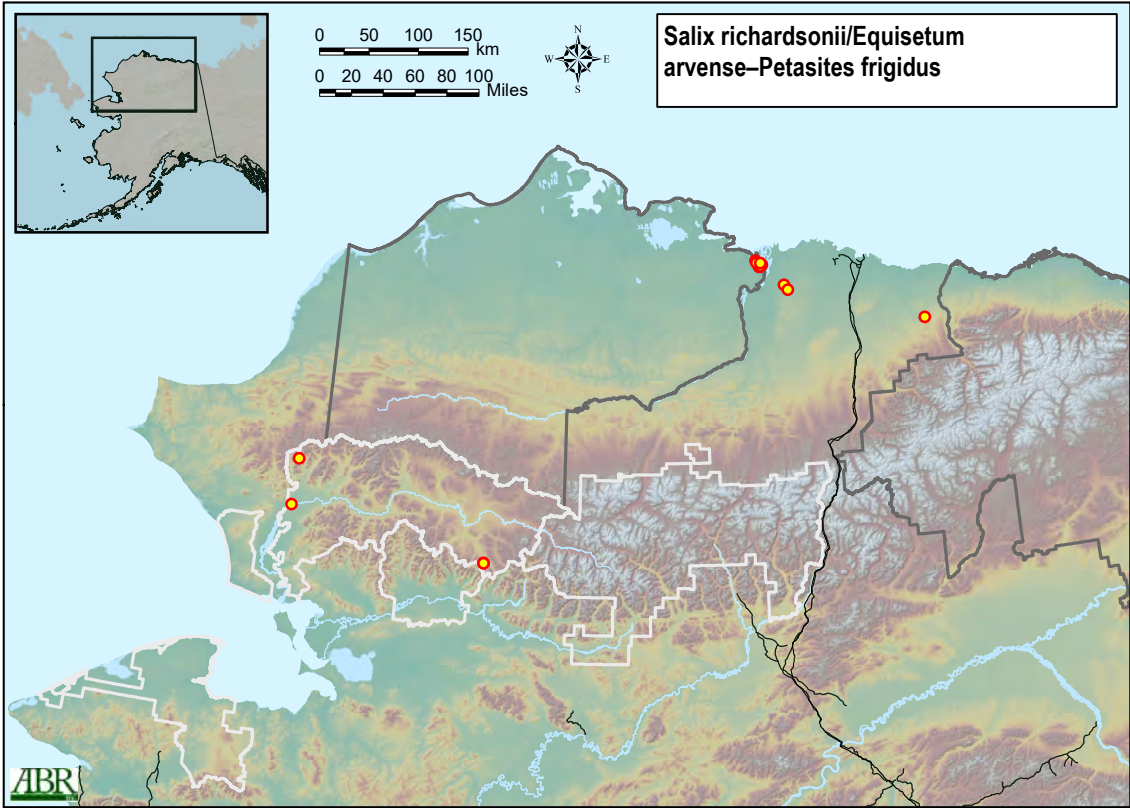

Distribution of *Salix richardsonii*/*Equisetum arvense*–*Petasites frigidus* in the study area.

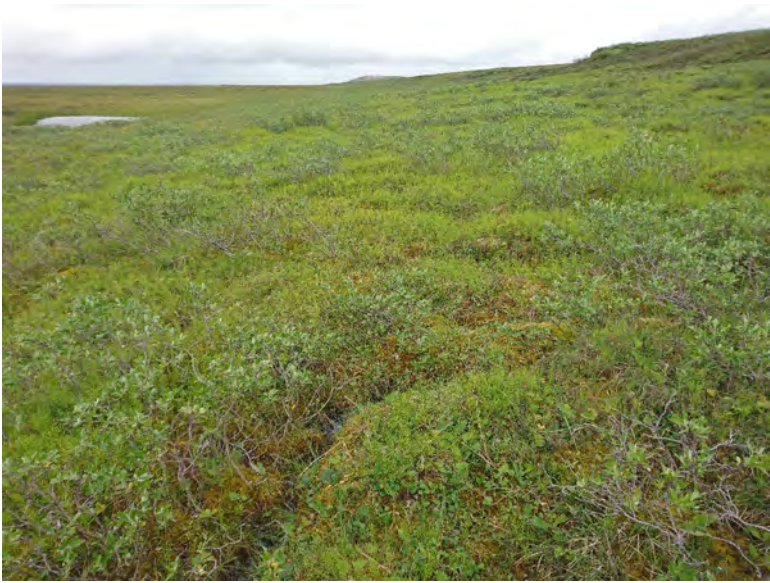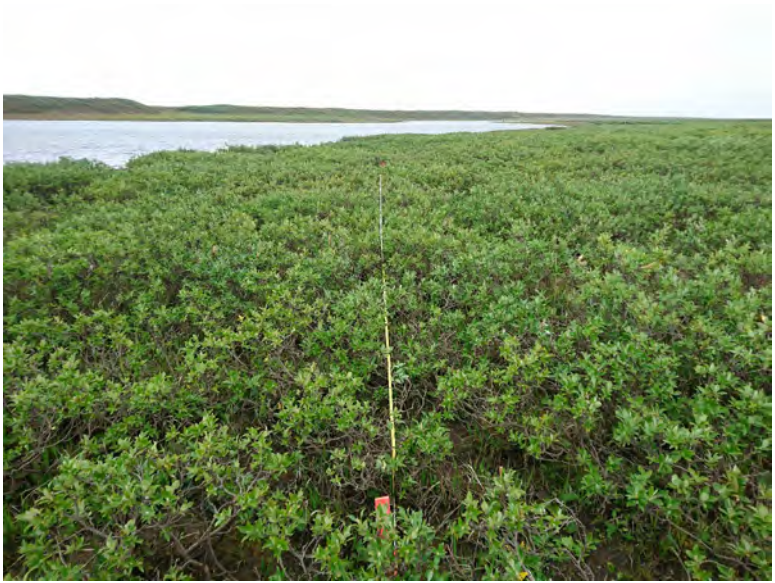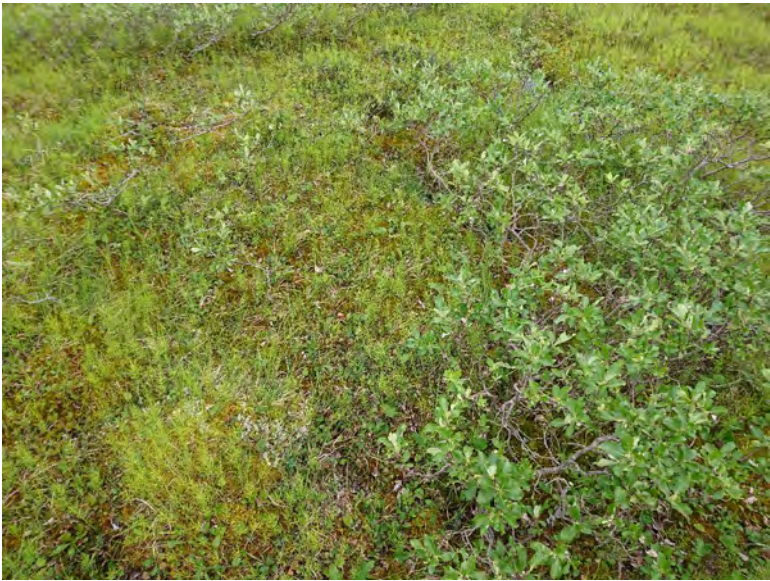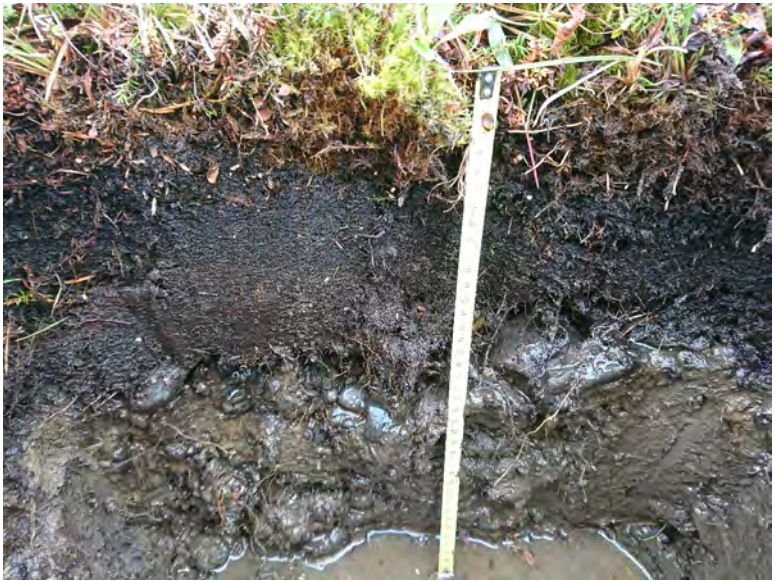

Representative photos (if available) for *Salix richardsonii*/*Equisetum arvense*–*Petasites frigidus*. Top row: landscape photos, bottom row: ground photo (left), soil photo (right).



SALRIC1/EQUARV–PETFRI: *Salix richardsonii*/*Equisetum arvense*–*Petasites frigidus*, continued

|                                   | Avg. | Std Dev. | Percentile |      |      | n  |
|-----------------------------------|------|----------|------------|------|------|----|
|                                   |      |          | 10th       | 50th | 90th |    |
| Elevation (m)                     | 143  | 183      | 2          | 51   | 419  | 11 |
| Slope (degrees)                   | 2    | 2        | 0          | 0    | 3    | 11 |
| Surface Organic Thickness (cm)    | 3.8  | 5.7      | 0.0        | 3.0  | 8.4  | 13 |
| Cumul. Org. Thickness (cm)        | 7.2  | 6.5      | 0.0        | 6.0  | 12.0 | 11 |
| Depth to >15% Rock Fragments (cm) | 29   | 23       | 9          | 21   | 58   | 6  |
| Water Table Depth (cm)            | -25  |          | -25        | -25  | -25  | 1  |
| Active Layer Thickness (cm)       | 85   | 23       | 66         | 82   | 106  | 4  |
| Site pH                           | 7.5  | 0.5      | 6.9        | 7.7  | 7.9  | 11 |
| Electrical Conductivity (uS/cm)   | 240  | 159      | 100        | 170  | 450  | 11 |
| Whole Tussock Cover (%)           | 0    | 0        | 0          | 0    | 0    | 4  |

Environmental data summaries for *Salix richardsonii*/*Equisetum arvense*–*Petasites frigidus*.

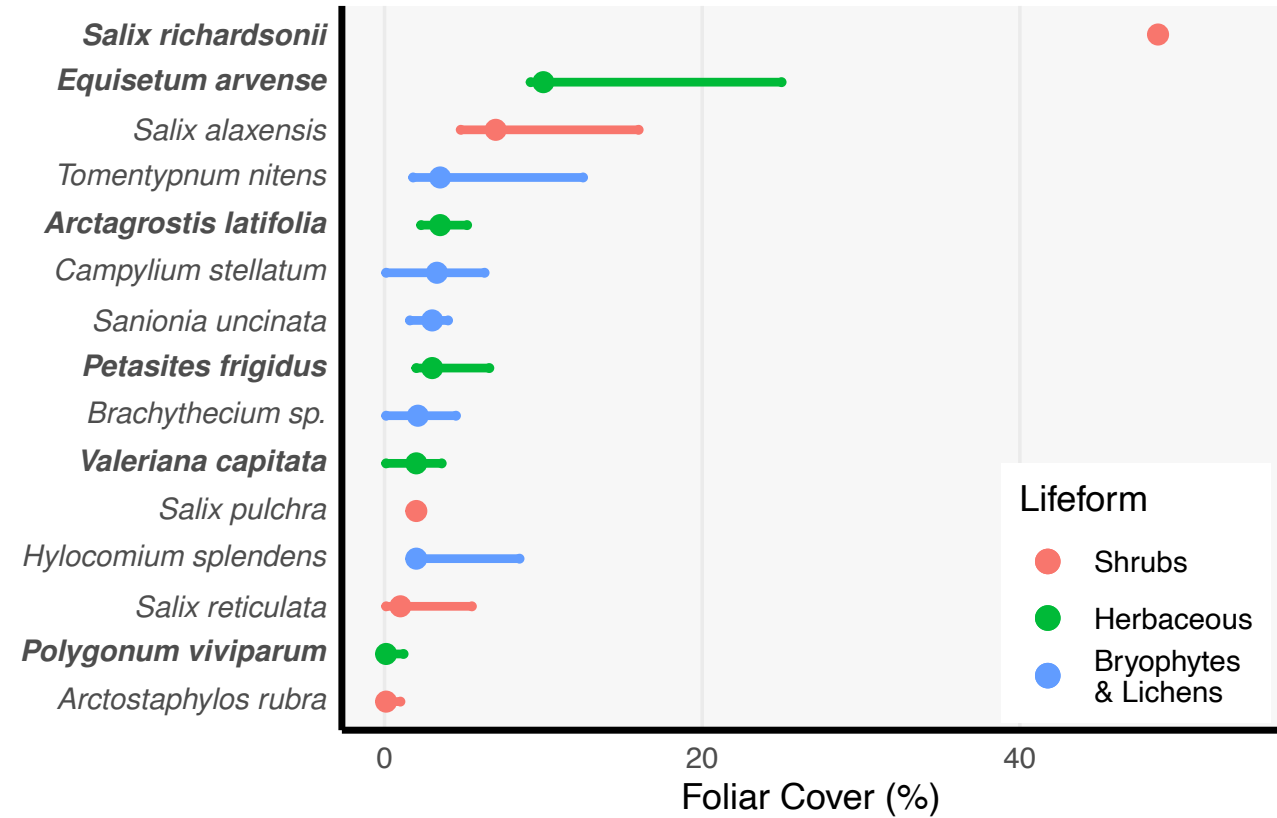

Median and 25th and 75th percentiles of foliar cover for the most common species in 3 lifeform groups in *Salix richardsonii*/*Equisetum arvense*–*Petasites frigidus*. Latin names on y-axis in bold font occur in ≥70% of plots in this plant association.

| Lifeform         | Code   | USDA Scientific Name          | Const. | Avg. | Std Dev. | Percentile |      |      |
|------------------|--------|-------------------------------|--------|------|----------|------------|------|------|
|                  |        |                               |        |      |          | 10th       | 50th | 90th |
| Deciduous Shrubs | SARE2  | <i>Salix reticulata</i>       | 54     | 7.5  | 14.6     | 0.1        | 1.0  | 20.8 |
| Deciduous Shrubs | SARI4  | <i>Salix richardsonii</i>     | 100    | 51.5 | 18.9     | 33.3       | 48.7 | 73.2 |
| Forbs            | ASAL7  | <i>Astragalus alpinus</i>     | 69     | 2.5  | 5.3      | 0.1        | 0.1  | 7.4  |
| Forbs            | PEFR5  | <i>Petasites frigidus</i>     | 100    | 4.2  | 3.6      | 1.3        | 3.0  | 9.3  |
| Forbs            | POVI3  | <i>Polygonum viviparum</i>    | 77     | 1.0  | 1.5      | 0.1        | 0.1  | 1.7  |
| Forbs            | VACA3  | <i>Valeriana capitata</i>     | 77     | 2.7  | 2.9      | 0.1        | 2.0  | 6.3  |
| Ferns & Allies   | EQAR   | <i>Equisetum arvense</i>      | 100    | 15.6 | 11.0     | 5.6        | 10.0 | 32.4 |
| Ferns & Allies   | EQVA   | <i>Equisetum variegatum</i>   | 62     | 4.2  | 3.8      | 1.0        | 2.6  | 8.9  |
| Grasses          | ARLA2  | <i>Arctagrostis latifolia</i> | 77     | 4.1  | 3.0      | 1.2        | 3.5  | 7.7  |
| Mosses           | CAST51 | <i>Campylium stellatum</i>    | 46     | 4.2  | 4.6      | 0.1        | 3.3  | 9.2  |

Constancy and foliar cover data summaries for *Salix richardsonii*/*Equisetum arvense*–*Petasites frigidus*. Constancy/cover summaries limited to taxa occurring in this plant association with a constancy ≥60 and average cover >0, or taxa with a constancy ≥40 and average cover ≥3.



**SALRIC1/EQUVAR: *Salix richardsonii*/*Equisetum variegatum* (n = 9)**

The plant association *Salix richardsonii*/*Equisetum variegatum* occurs in Riverine physiography on the following geomorphic units: Delta Inactive Overbank Deposit and Meander Active Overbank Deposit. The average elevation in this plant association is 4m ( $\pm 2$ m), and the slope gradient is typically flat. This plant association was associated most commonly with the surface form Disjunct Polygon Rims, but is also regularly associated with Low-centered, Low-relief, Low-density Polygons; Nonpatterned; and Low-centered, High-relief, Low-density Polygons. Soils are very poorly drained to moderately well drained, surface organic thickness typically ranges from absent to very thin, coarse fragments are rare, but when they do occur the average top depth is 94cm ( $\pm 0$ cm), dominant soil texture in the upper 40 cm is typically Loamy or Organic-rich, and permafrost was common with an average active layer thickness of 49cm ( $\pm 11$ cm). Water pH typically ranges from circumacidic to alkaline, and the average electrical conductivity is 279  $\mu$ S/cm ( $\pm 183$   $\mu$ S/cm). The most common vegetation types include Open Low Willow, Open Low Willow-Sedge Shrub Tundra, and Moist Sedge-Willow Tundra. The vegetation is dominated by *Salix richardsonii*, and *Equisetum variegatum* is always present in the understory at moderate to high cover. Other plant taxa that commonly occur in this plant association at low abundance include, the shrubs *Salix reticulata*, *Arctostaphylos rubra*, *Salix ovalifolia*, and *Dryas integrifolia*; the herbs *Eriophorum angustifolium*, *Polygonum viviparum*, *Astragalus alpinus*, and *Carex aquatilis*; and the nonvasculars *Distichium capillaceum*, *Tomentypnum nitens*, *Calliergon richardsonii*, *Limprichtia revolvens*, and *Campylium stellatum*.

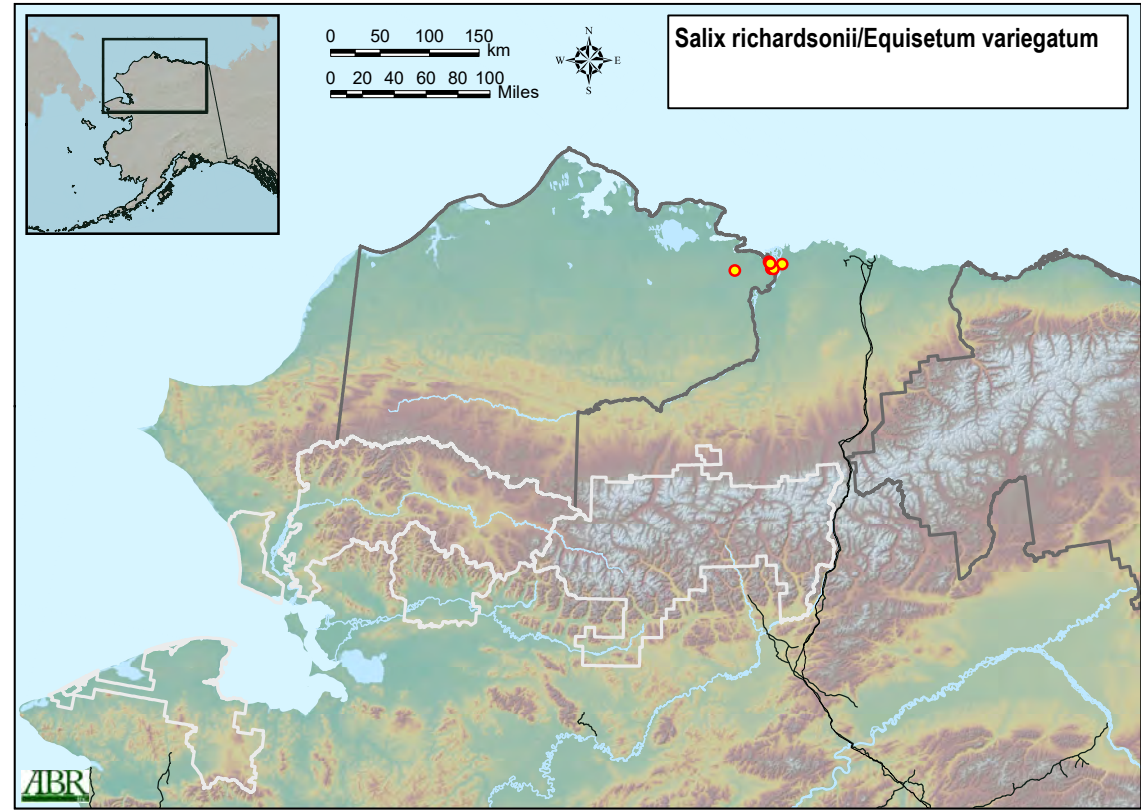

Distribution of *Salix richardsonii*/*Equisetum variegatum* in the study area.

A4367p: Arctic Minerotrophic Wet Low Shrublands (proposed)

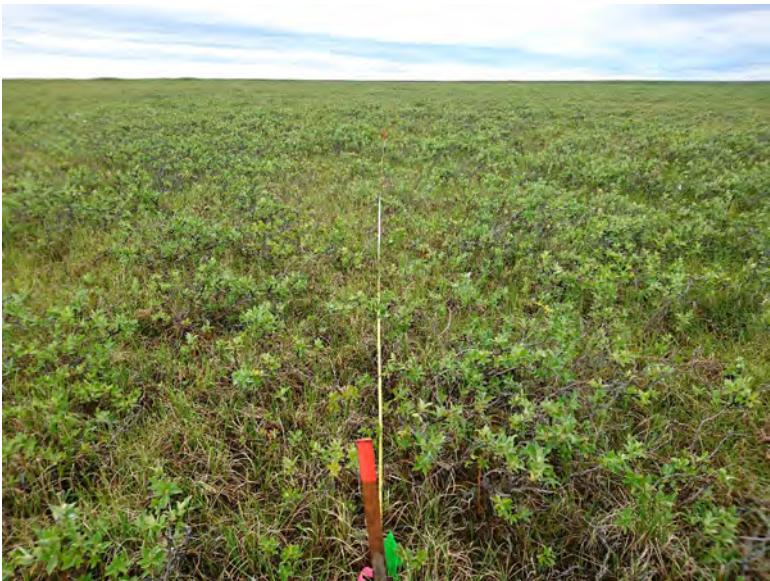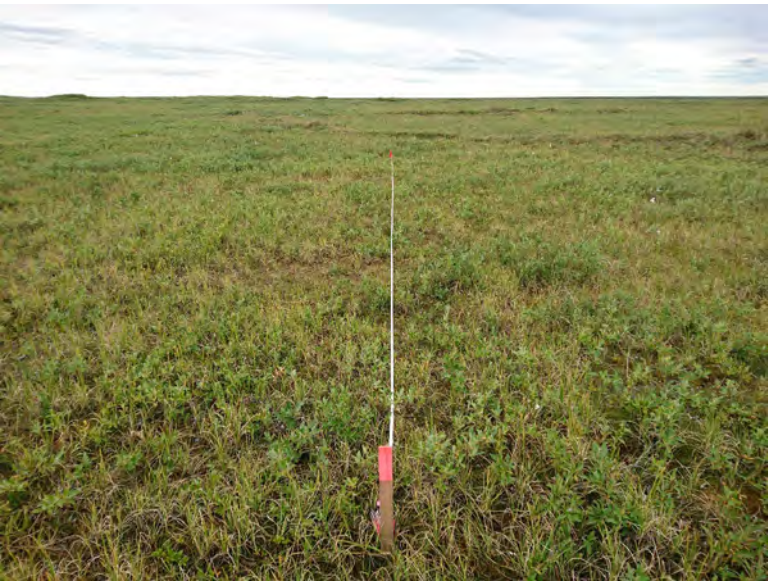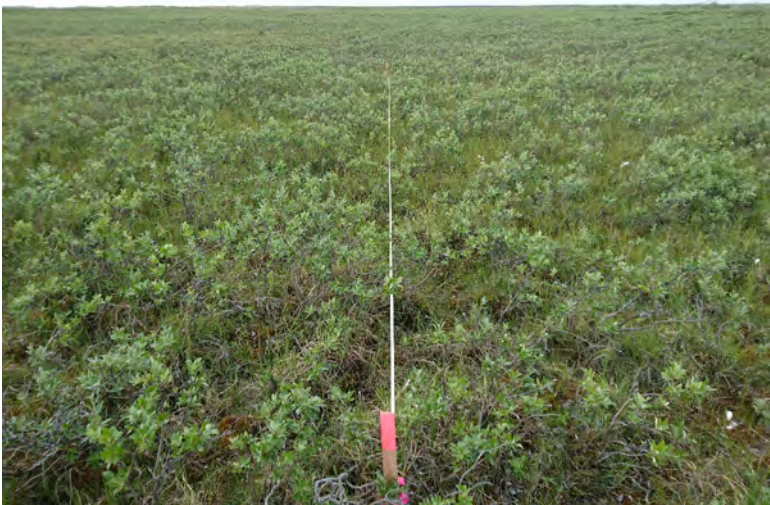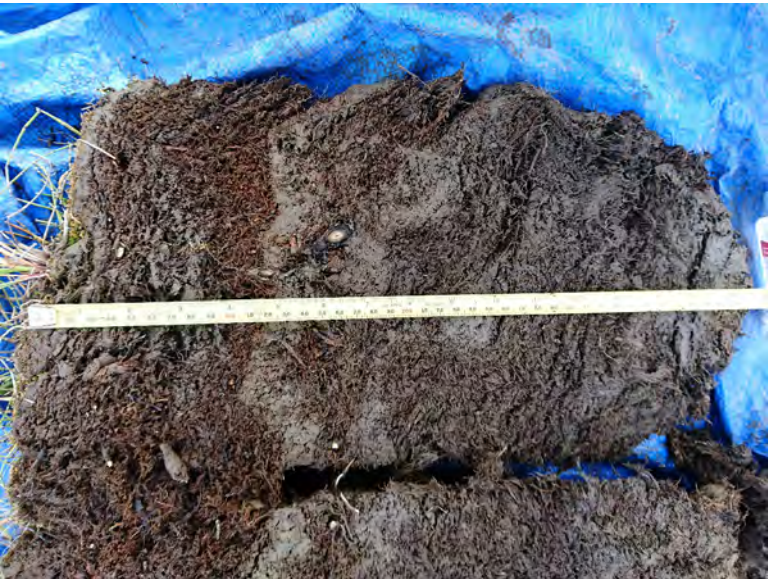

Representative photos (if available) for *Salix richardsonii*/*Equisetum variegatum*. Top row: landscape photos, bottom row: ground photo (left), soil photo (right).



SALRIC1/EQUVAR: *Salix richardsonii*/*Equisetum variegatum*, continued

|                                   | Avg. | Std Dev. | Percentile |      |      | n |
|-----------------------------------|------|----------|------------|------|------|---|
|                                   |      |          | 10th       | 50th | 90th |   |
| Elevation (m)                     | 4    | 2        | 3          | 3    | 6    | 8 |
| Slope (degrees)                   | 0    | 1        | 0          | 0    | 1    | 8 |
| Surface Organic Thickness (cm)    | 1.4  | 2.1      | 0.0        | 1.0  | 5.0  | 9 |
| Cumul. Org. Thickness (cm)        | 13.1 | 11.8     | 4.4        | 8.8  | 30.1 | 8 |
| Depth to >15% Rock Fragments (cm) | 94   |          | 94         | 94   | 94   | 1 |
| Water Table Depth (cm)            | -46  | 11       | -56        | -41  | -40  | 4 |
| Active Layer Thickness (cm)       | 49   | 11       | 42         | 45   | 60   | 6 |
| Site pH                           | 6.8  | 0.6      | 6.1        | 6.9  | 7.6  | 8 |
| Electrical Conductivity (uS/cm)   | 279  | 183      | 135        | 225  | 488  | 8 |
| Whole Tussock Cover (%)           | 0    |          | 0          | 0    | 0    | 1 |

Environmental data summaries for *Salix richardsonii*/*Equisetum variegatum*.

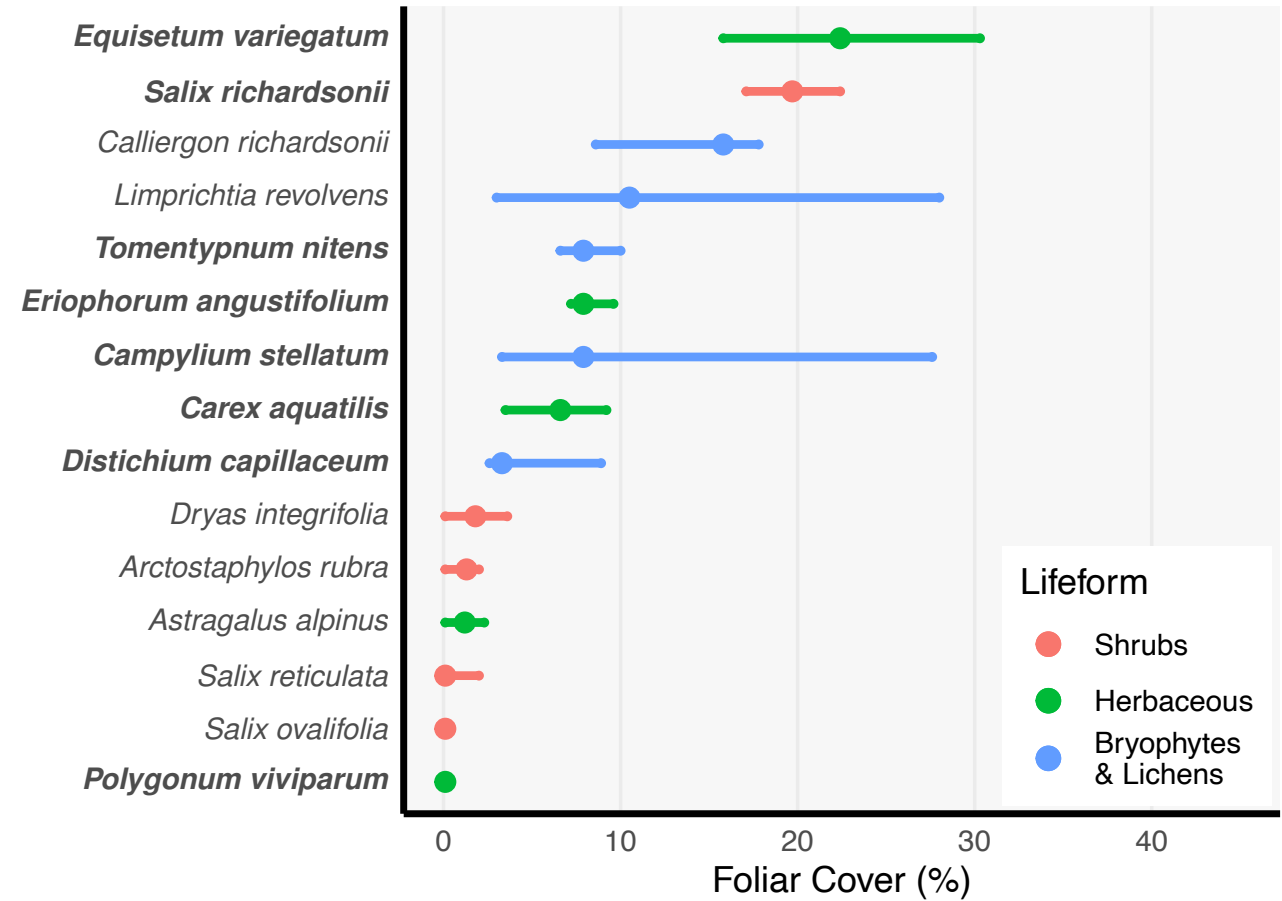

Median and 25th and 75th percentiles of foliar cover for the most common species in 3 lifeform groups in *Salix richardsonii*/*Equisetum variegatum*. Latin names on y-axis in bold font occur in ≥70% of plots in this plant association.

| Lifeform         | Code   | USDA Scientific Name            | Const. | Avg. | Std Dev. | Percentile |      |      |
|------------------|--------|---------------------------------|--------|------|----------|------------|------|------|
|                  |        |                                 |        |      |          | 10th       | 50th | 90th |
| Deciduous Shrubs | SARE2  | <i>Salix reticulata</i>         | 67     | 1.2  | 1.7      | 0.1        | 0.1  | 3.3  |
| Deciduous Shrubs | SARI4  | <i>Salix richardsonii</i>       | 100    | 24.4 | 12.6     | 15.5       | 19.7 | 38.8 |
| Evergreen Shrubs | DRIN4  | <i>Dryas integrifolia</i>       | 67     | 2.4  | 2.5      | 0.1        | 1.8  | 5.3  |
| Forbs            | ASAL7  | <i>Astragalus alpinus</i>       | 67     | 1.5  | 1.5      | 0.1        | 1.2  | 3.3  |
| Forbs            | PESU   | <i>Pedicularis sudetica</i>     | 67     | 1.0  | 0.6      | 0.1        | 0.1  | 1.3  |
| Forbs            | POVI3  | <i>Polygonum viviparum</i>      | 78     | 0.1  | 0.5      | 0.1        | 0.1  | 1.0  |
| Ferns & Allies   | EQSC   | <i>Equisetum scirpoides</i>     | 56     | 11.8 | 7.9      | 2.9        | 17.1 | 17.9 |
| Ferns & Allies   | EQVA   | <i>Equisetum variegatum</i>     | 100    | 22.4 | 9.0      | 12.4       | 22.4 | 34.0 |
| Sedges           | CAAQ   | <i>Carex aquatilis</i>          | 89     | 6.7  | 4.3      | 2.0        | 6.6  | 10.8 |
| Sedges           | ERAN6  | <i>Eriophorum angustifolium</i> | 78     | 9.1  | 6.7      | 4.0        | 7.9  | 14.9 |
| Mosses           | CAST51 | <i>Campylium stellatum</i>      | 78     | 16.4 | 17.1     | 2.1        | 7.9  | 38.7 |
| Mosses           | DICA29 | <i>Distichium capillaceum</i>   | 89     | 6.6  | 6.4      | 2.2        | 3.3  | 14.3 |
| Mosses           | LIRE13 | <i>Limprichtia revolvens</i>    | 67     | 15.8 | 16.0     | 2.0        | 10.5 | 34.9 |
| Mosses           | TONI70 | <i>Tomentypnum nitens</i>       | 100    | 9.6  | 7.7      | 4.0        | 7.9  | 16.1 |

Constancy and foliar cover data summaries for *Salix richardsonii*/*Equisetum variegatum*. Constancy/cover summaries limited to taxa occurring in this plant association with a constancy ≥60 and average cover >0, or taxa with a constancy ≥40 and average cover ≥3.
